# Supplementary material for: Sputum Proteome Signatures of Mechanically Ventilated Intensive Care Unit Patients Distinguish Samples with or without Anti-pneumococcal Activity
Source: PubMed Central journal article supplement (PMC8546979; doi:10.1128/msystems.00702-20), 2021-03-02
Supplement: msystems.00702-20-sf005.pdf [file msystems.00702-20-sf005.pdf]

A

# AdcA2

unpaired wilcoxon test

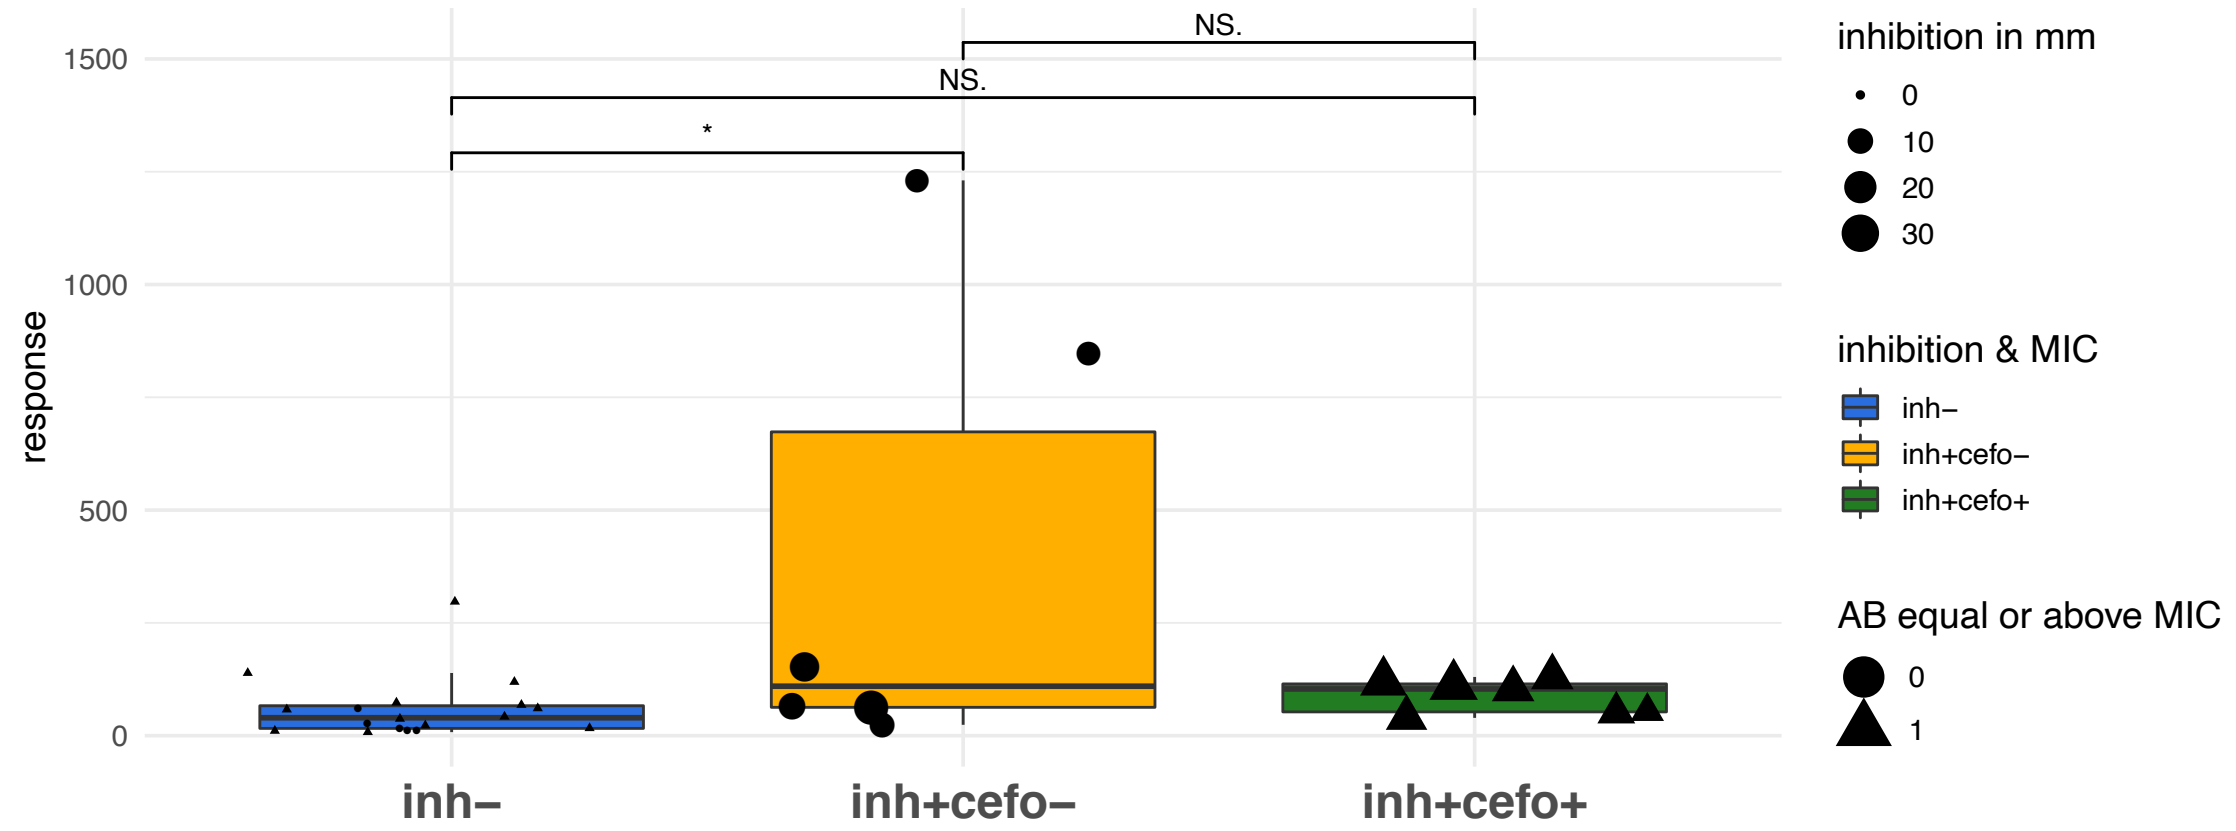

NS >0.05, \* <0.05, \*\* < 0.01, \*\*\* <0.001

B

# AdcA2

y-axis = log<sub>10</sub>-scale

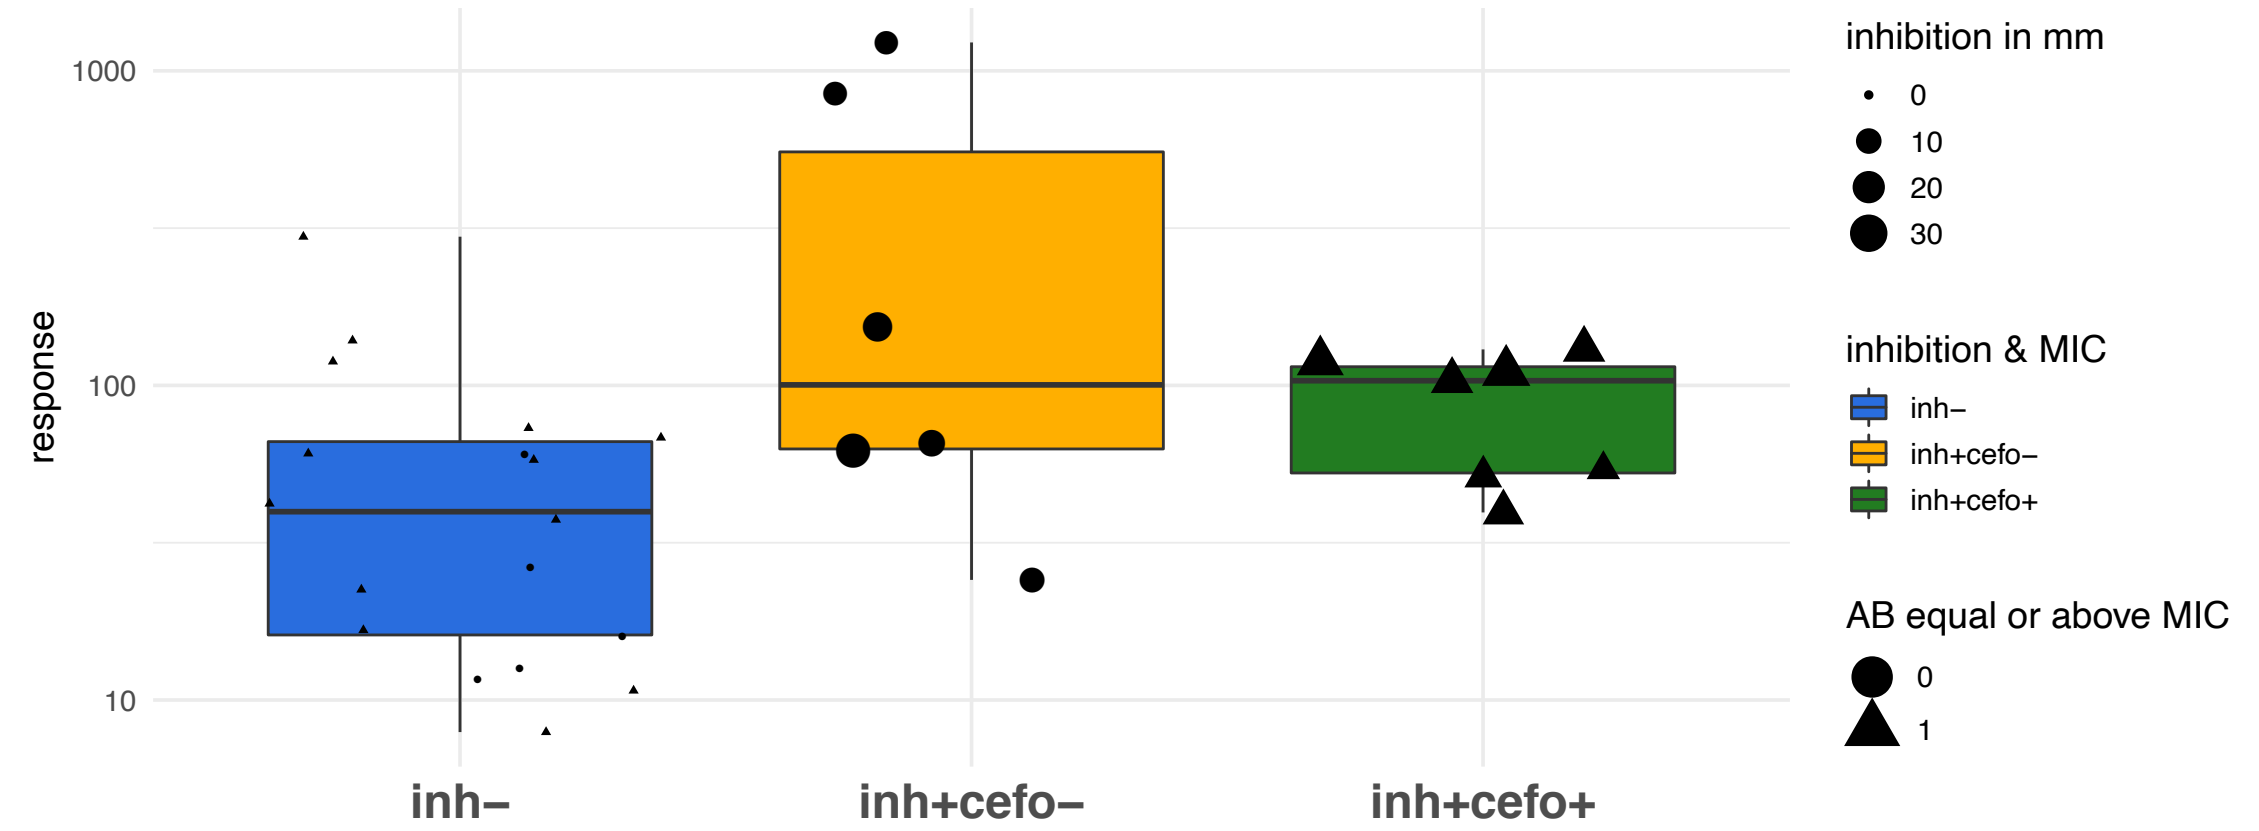

A

## AliA

unpaired wilcoxon test

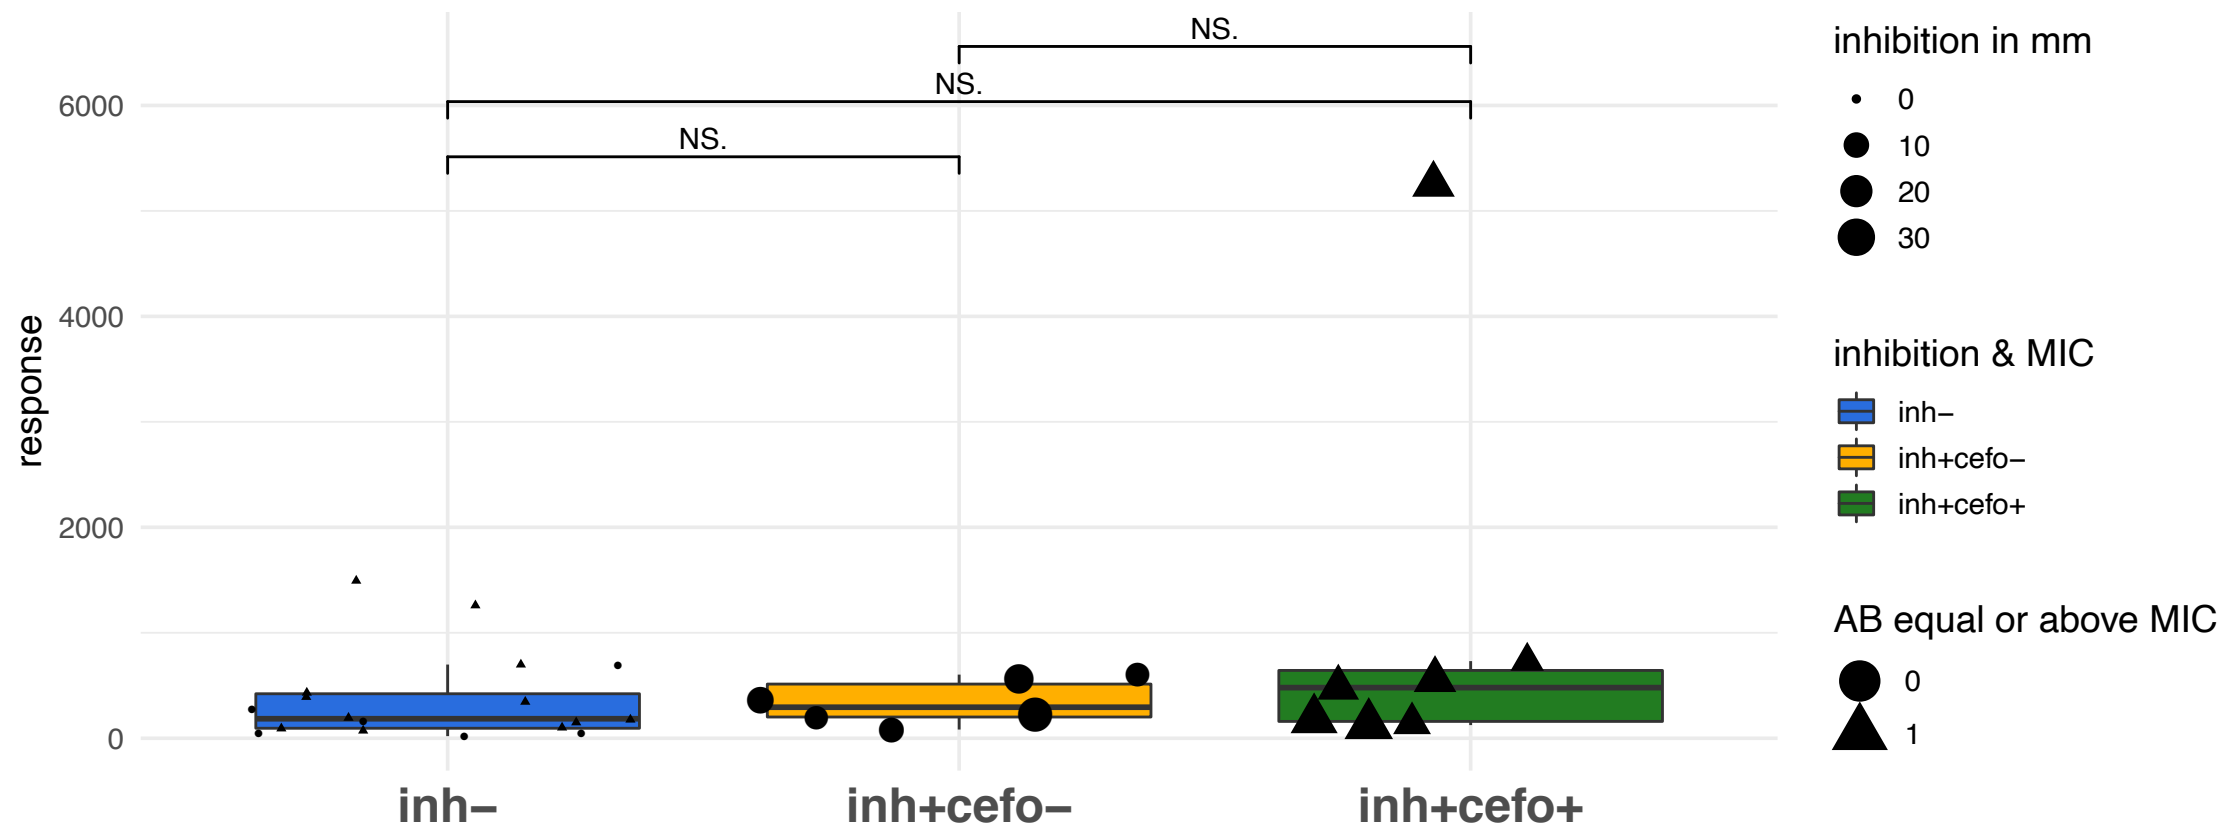

NS &gt;0.05, \* &lt;0.05, \*\* &lt;0.01, \*\*\* &lt;0.001

B

## AliA

y-axis = log<sub>10</sub>-scale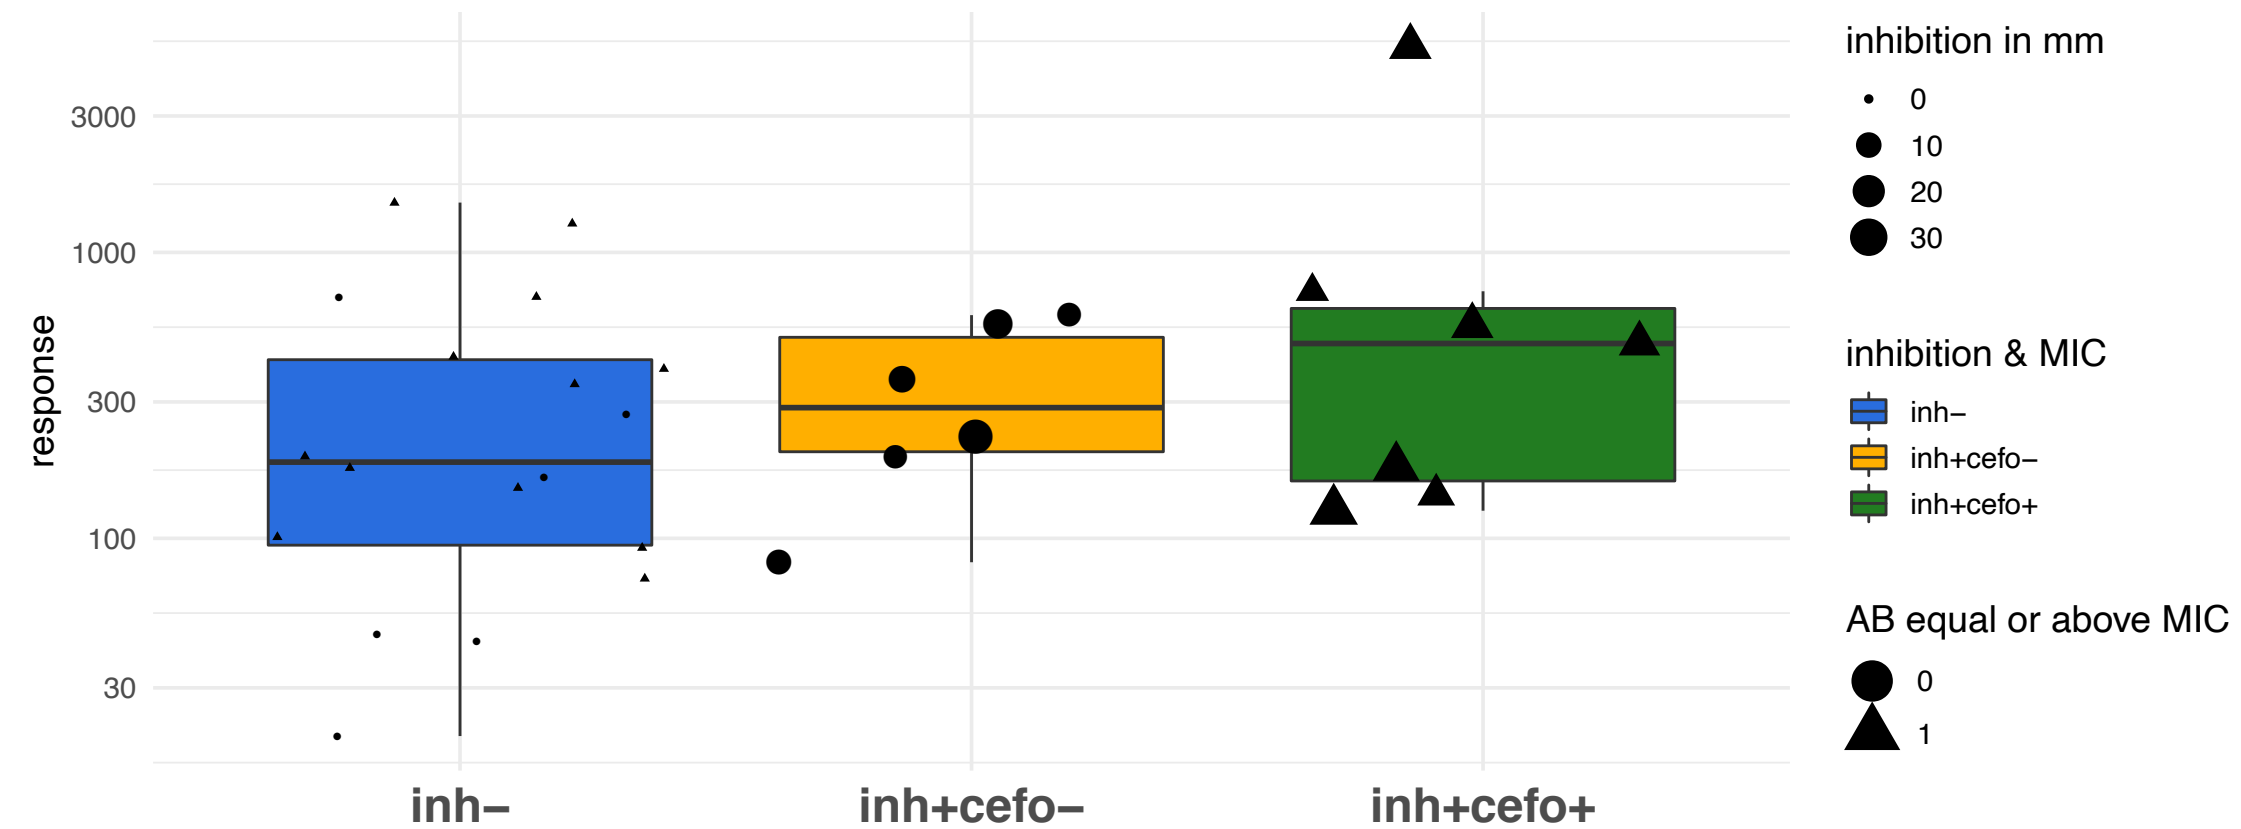

A

## AlIB

unpaired wilcoxon test

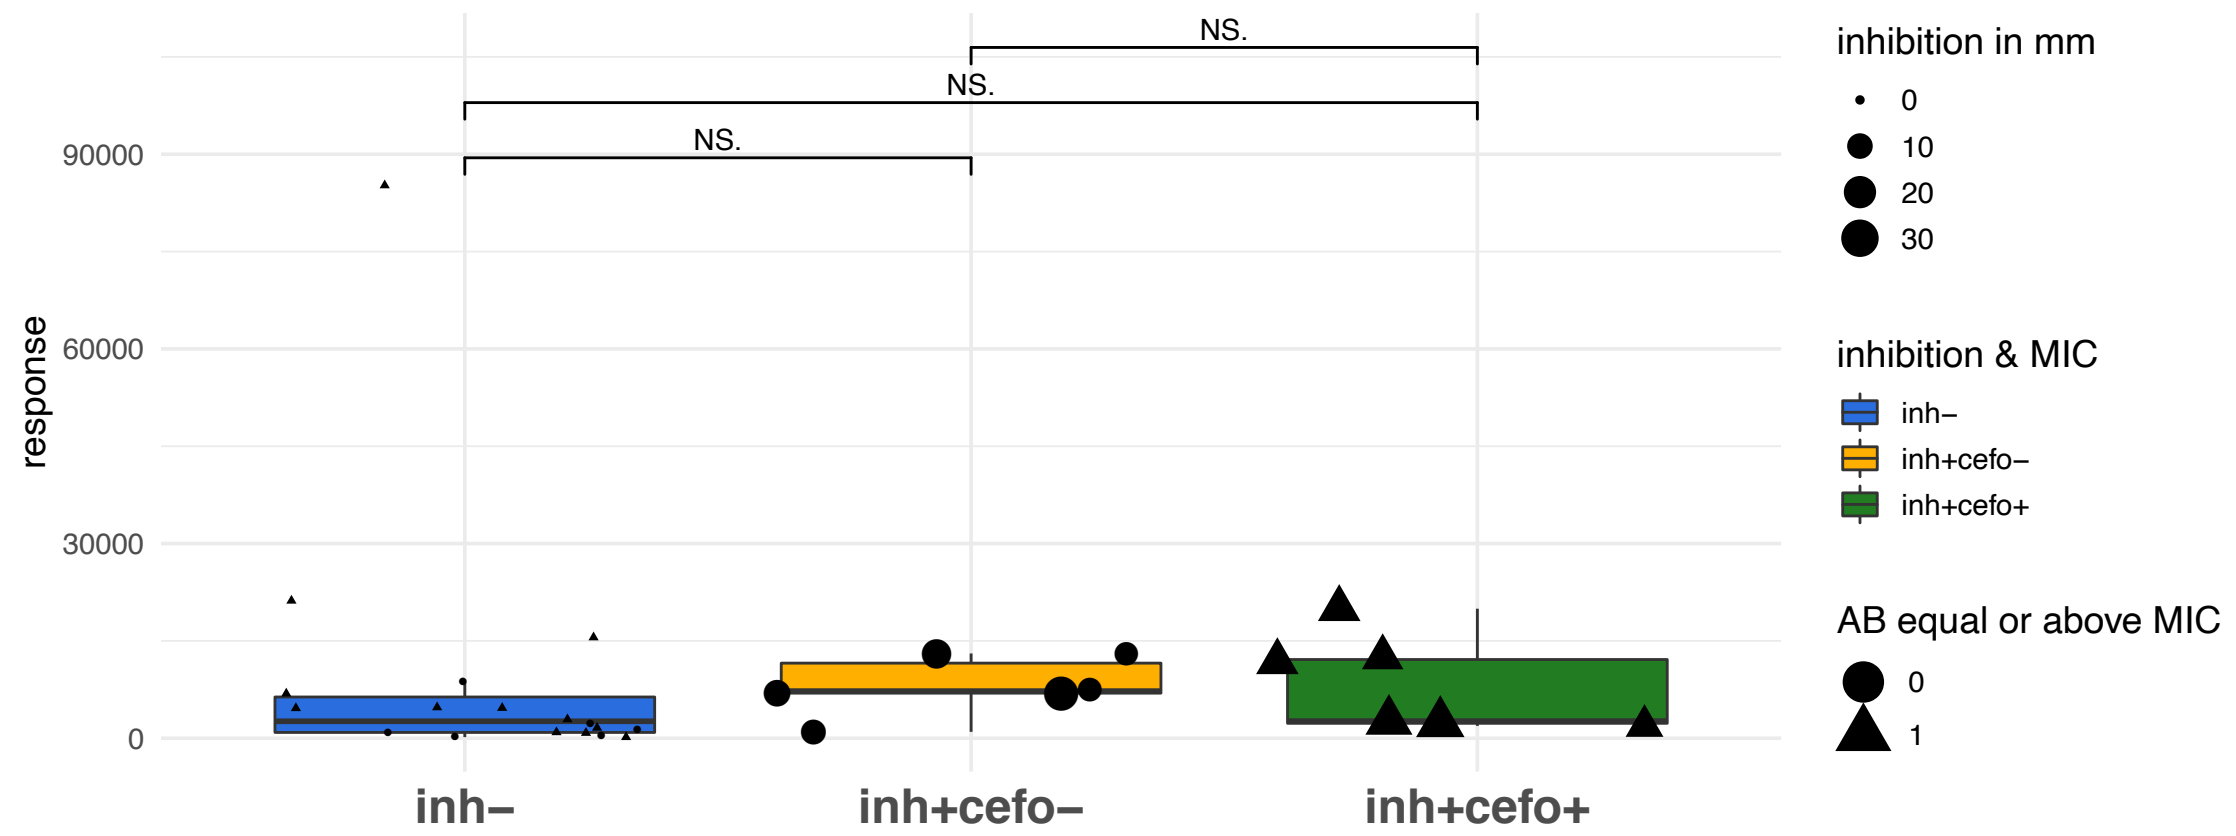

NS &gt;0.05, \* &lt;0.05, \*\* &lt;0.01, \*\*\* &lt;0.001

B

## AlIB

y-axis = log<sub>10</sub>-scale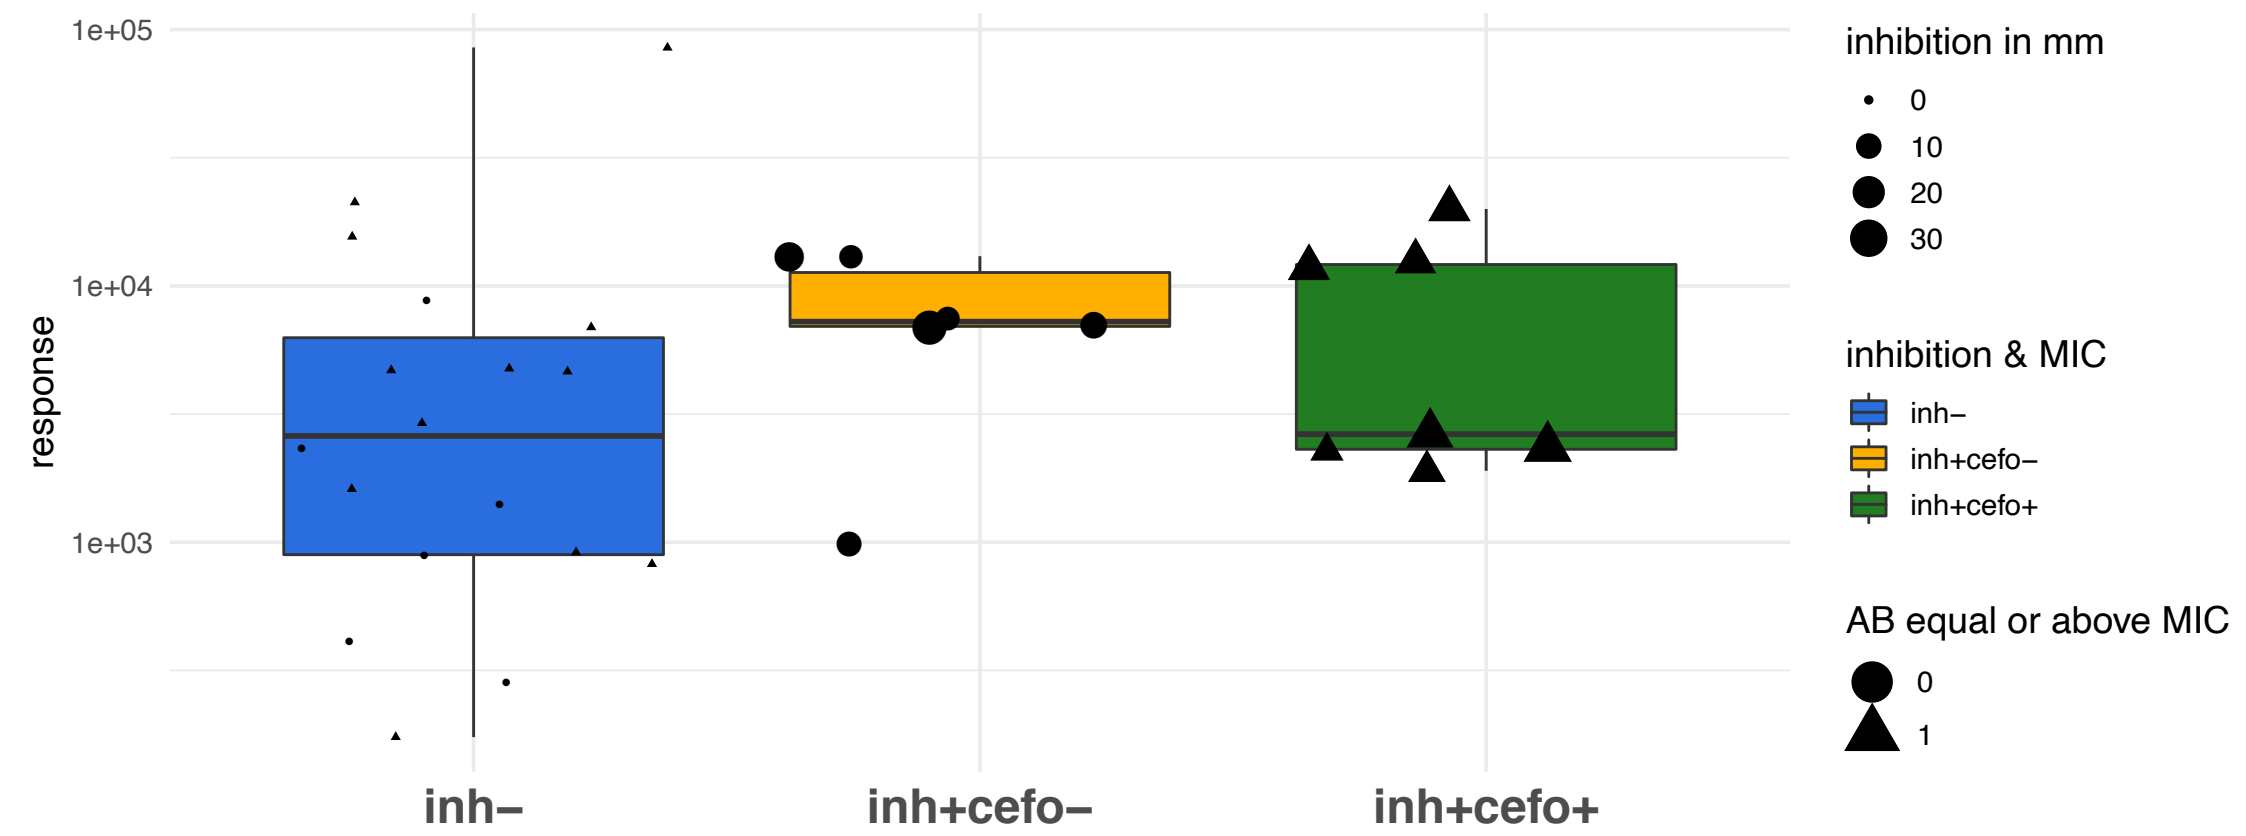

A

# AliC

unpaired wilcoxon test

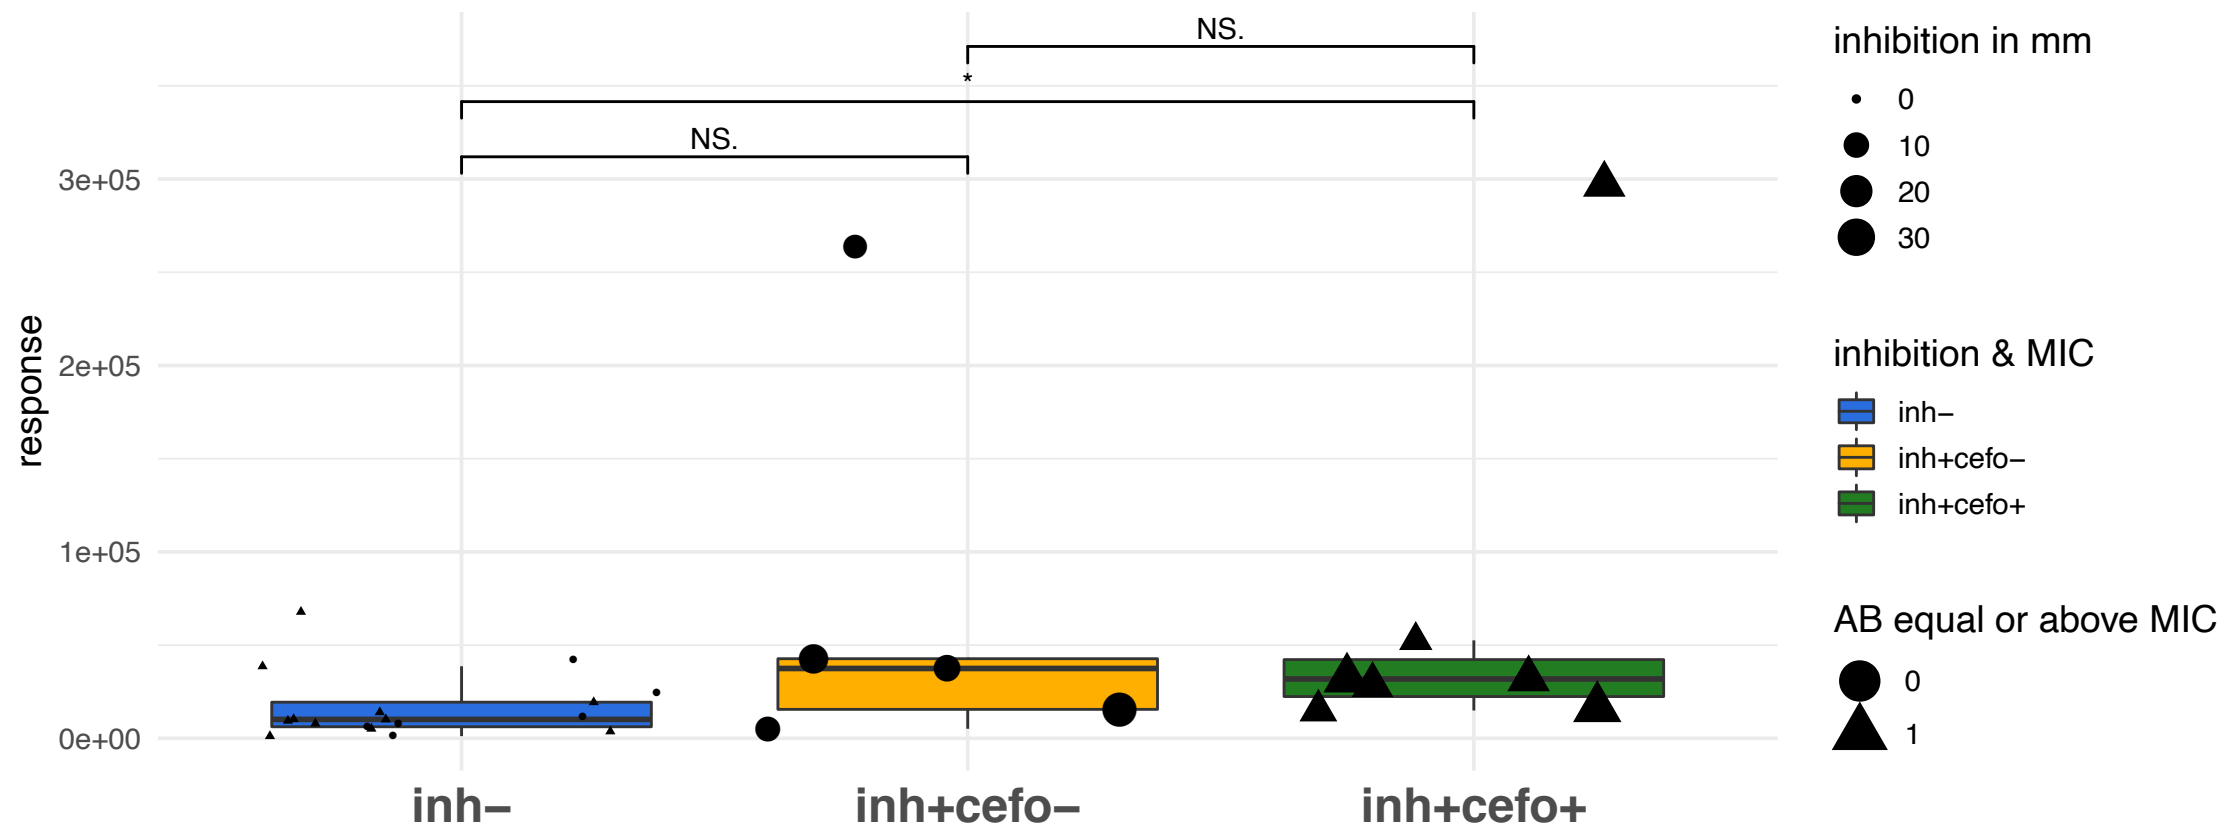

NS >0.05, \* <0.05, \*\* <0.01, \*\*\* <0.001

B

# AliC

y-axis = log<sub>10</sub>-scale

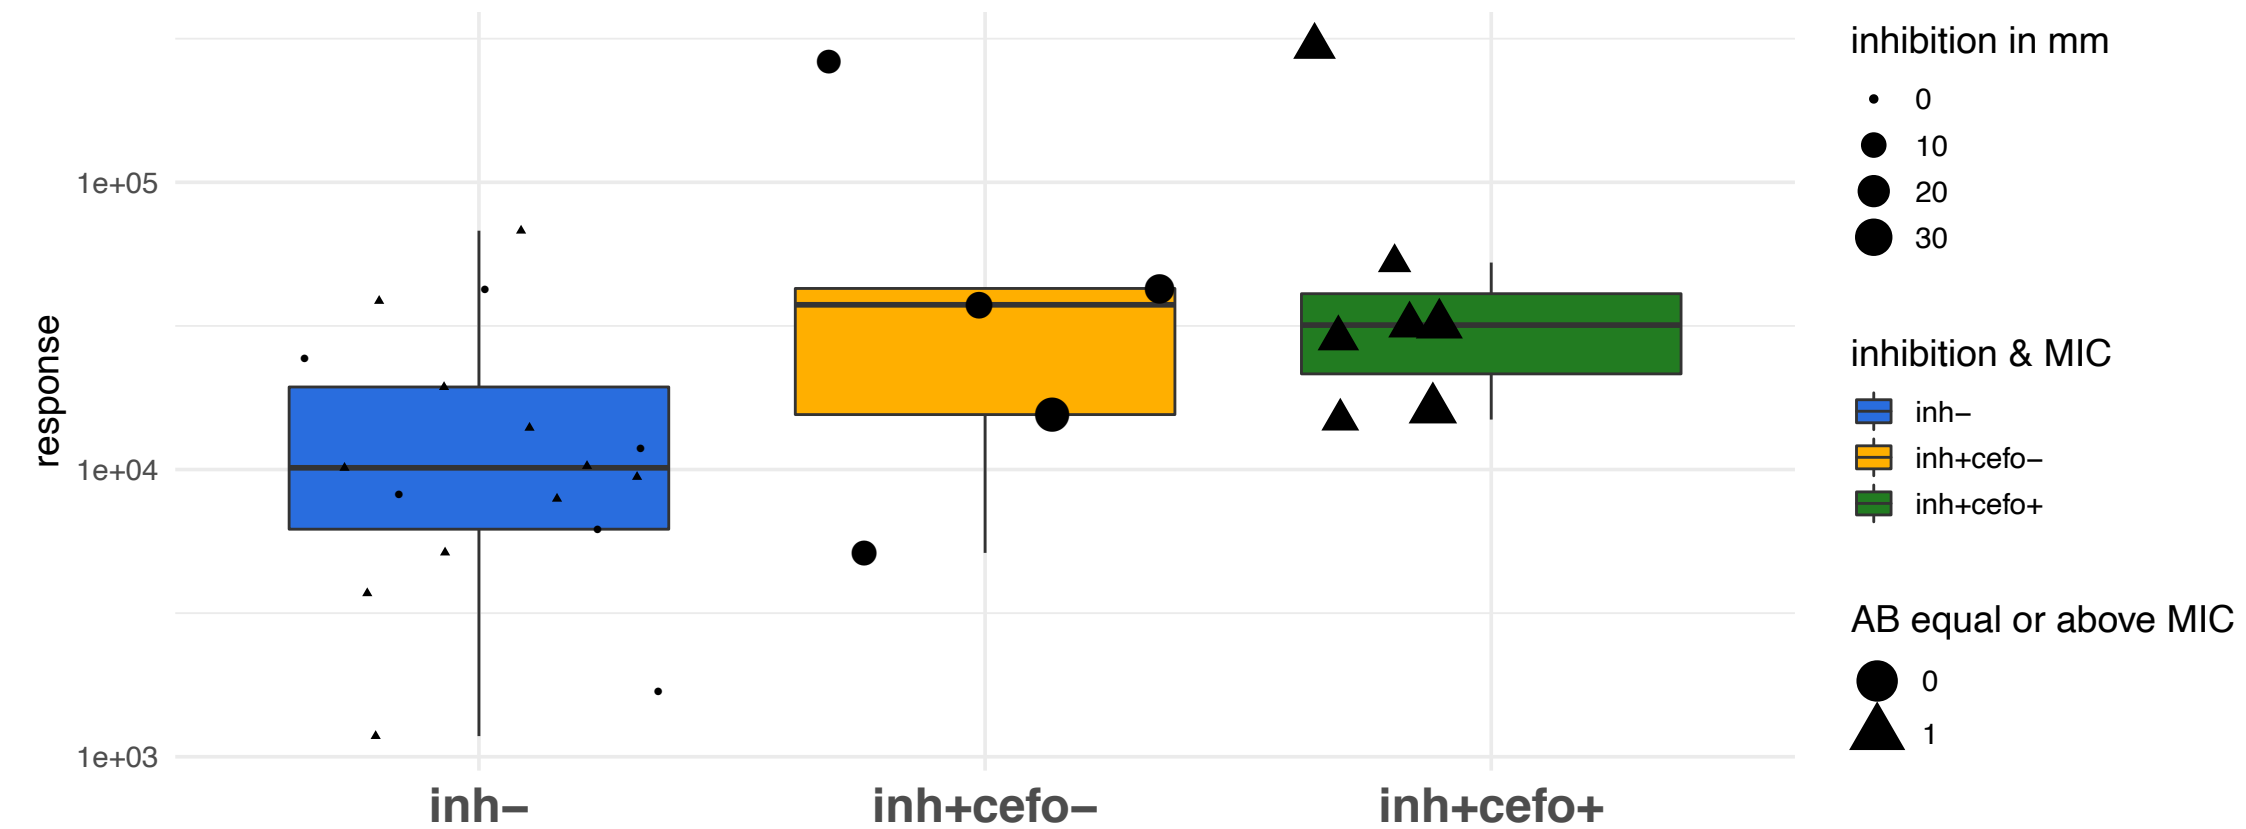

A

# AIiD

unpaired wilcoxon test

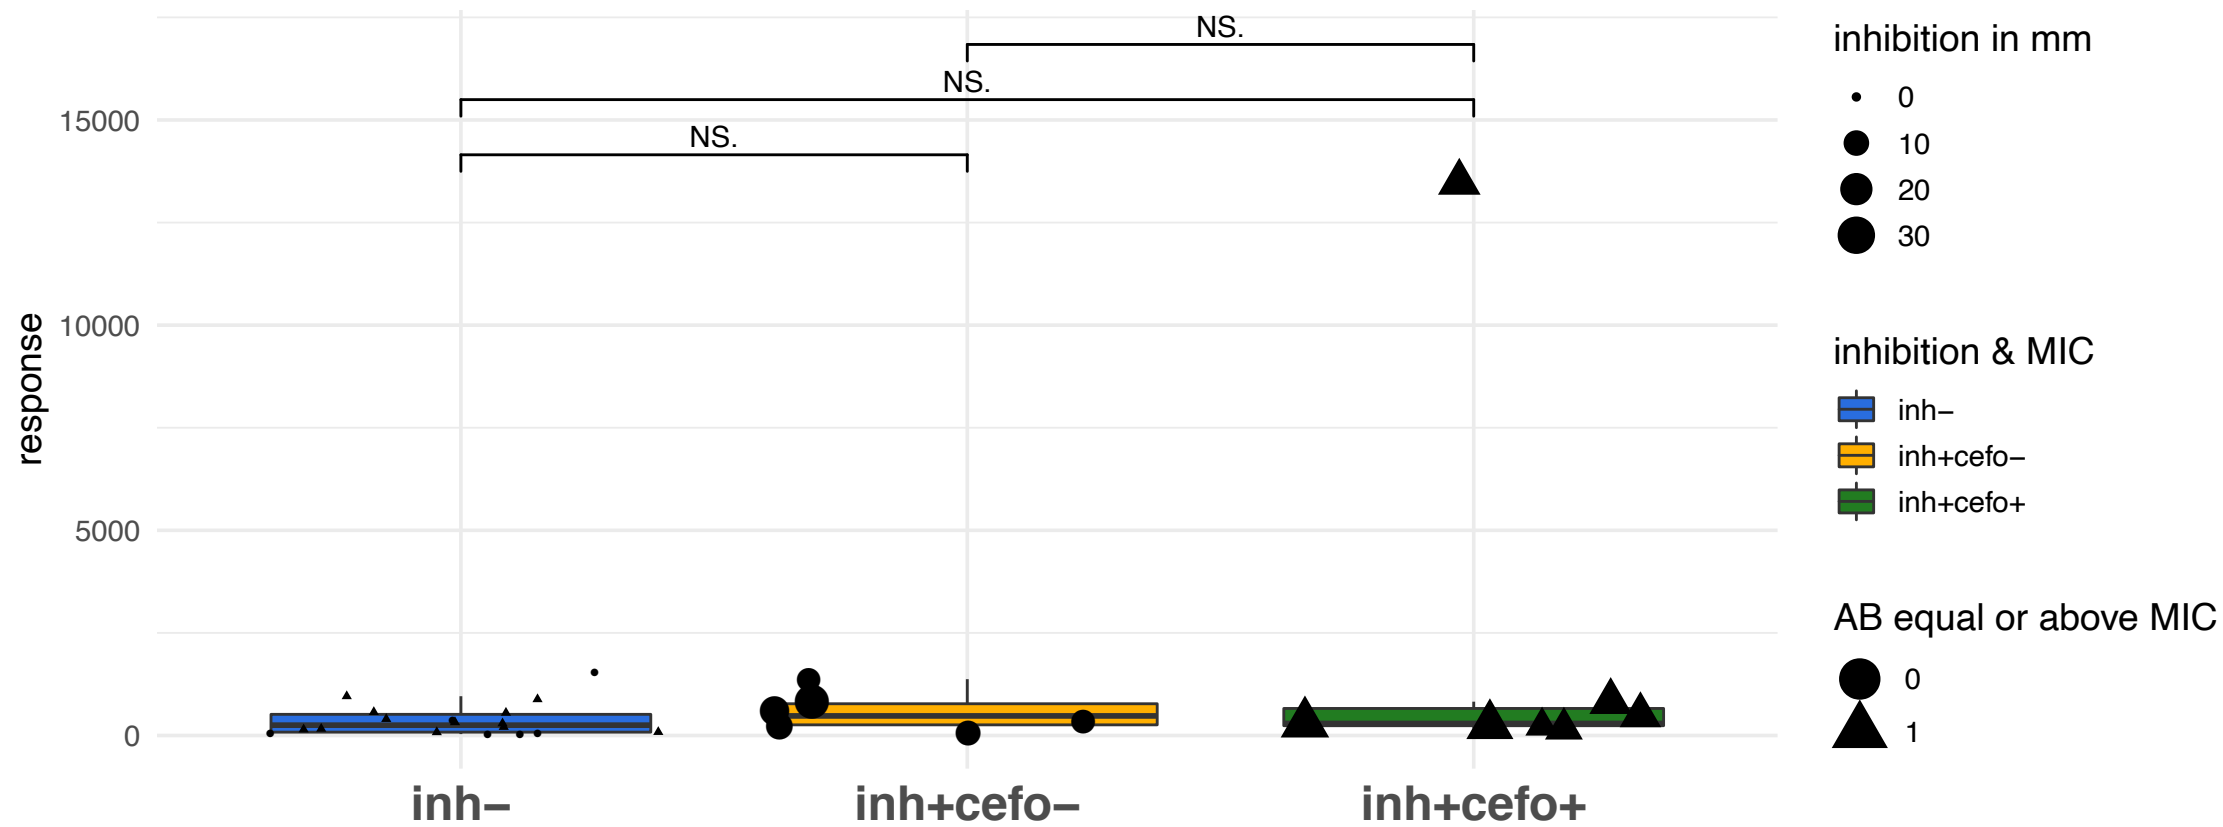

NS >0.05, \* <0.05, \*\* <0.01, \*\*\* <0.001

B

# AIiD

y-axis = log<sub>10</sub>-scale

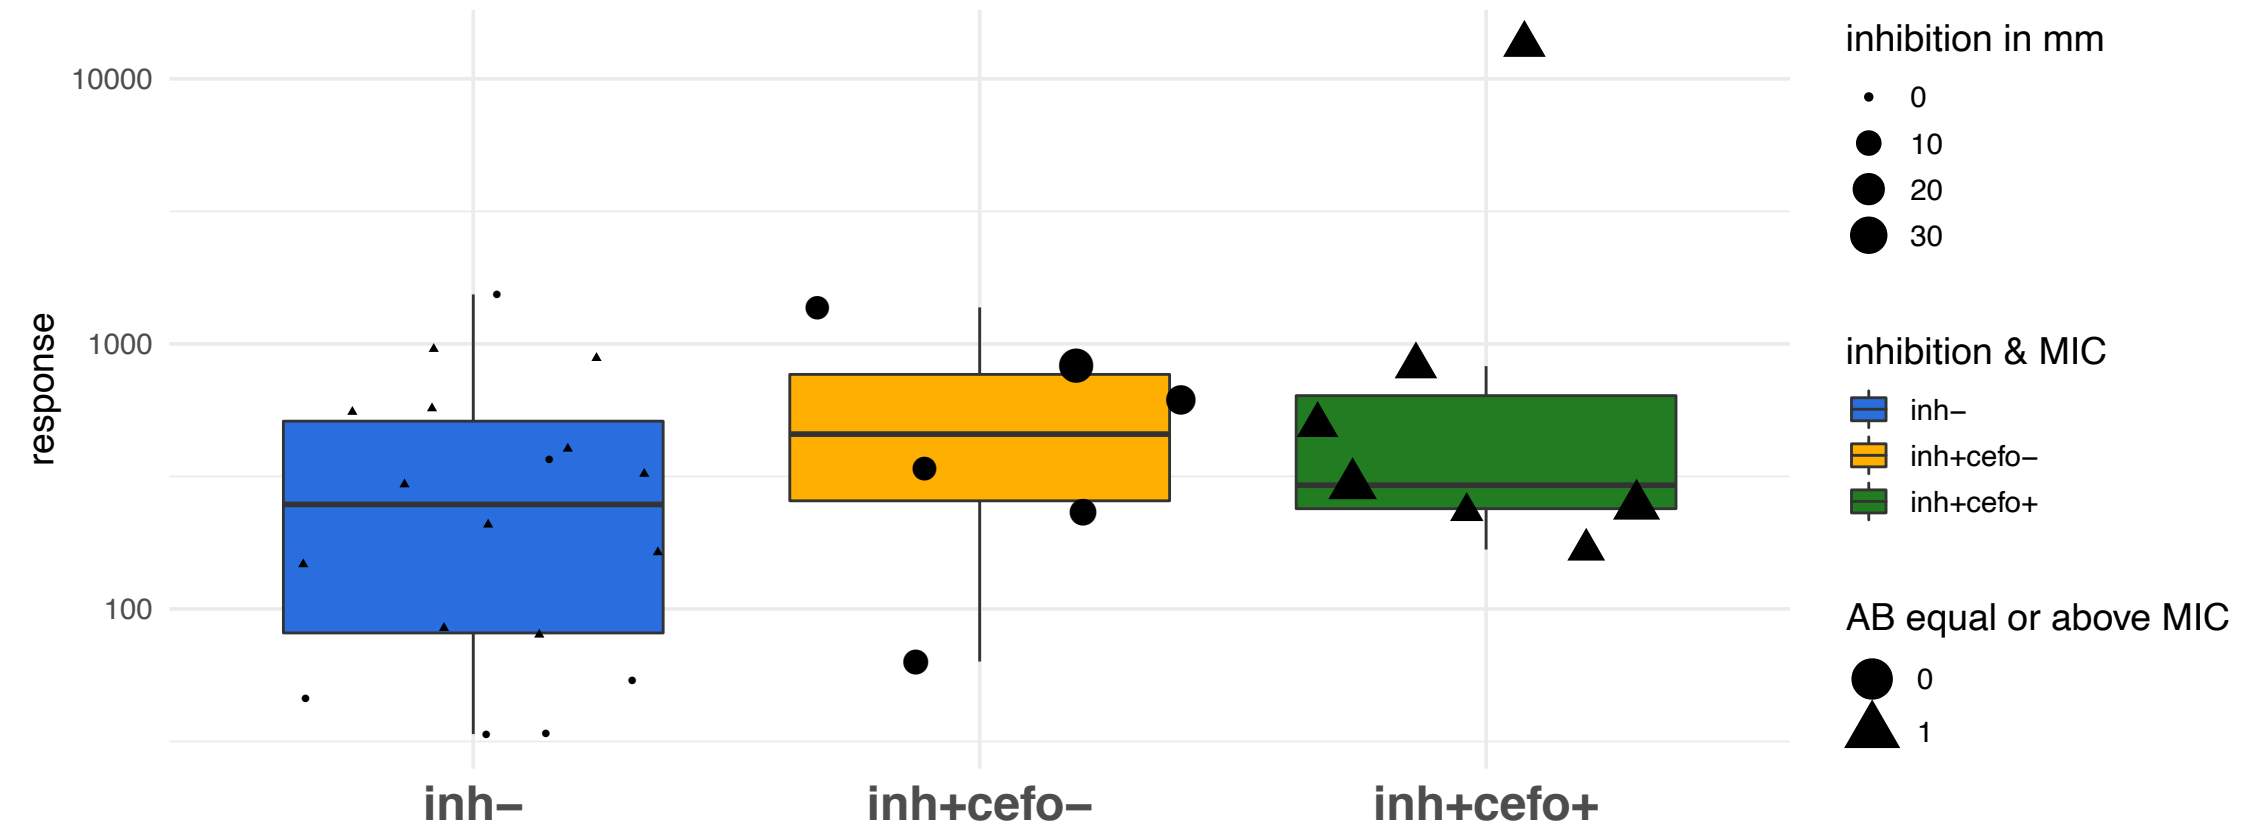

A

## AmiA

unpaired wilcoxon test

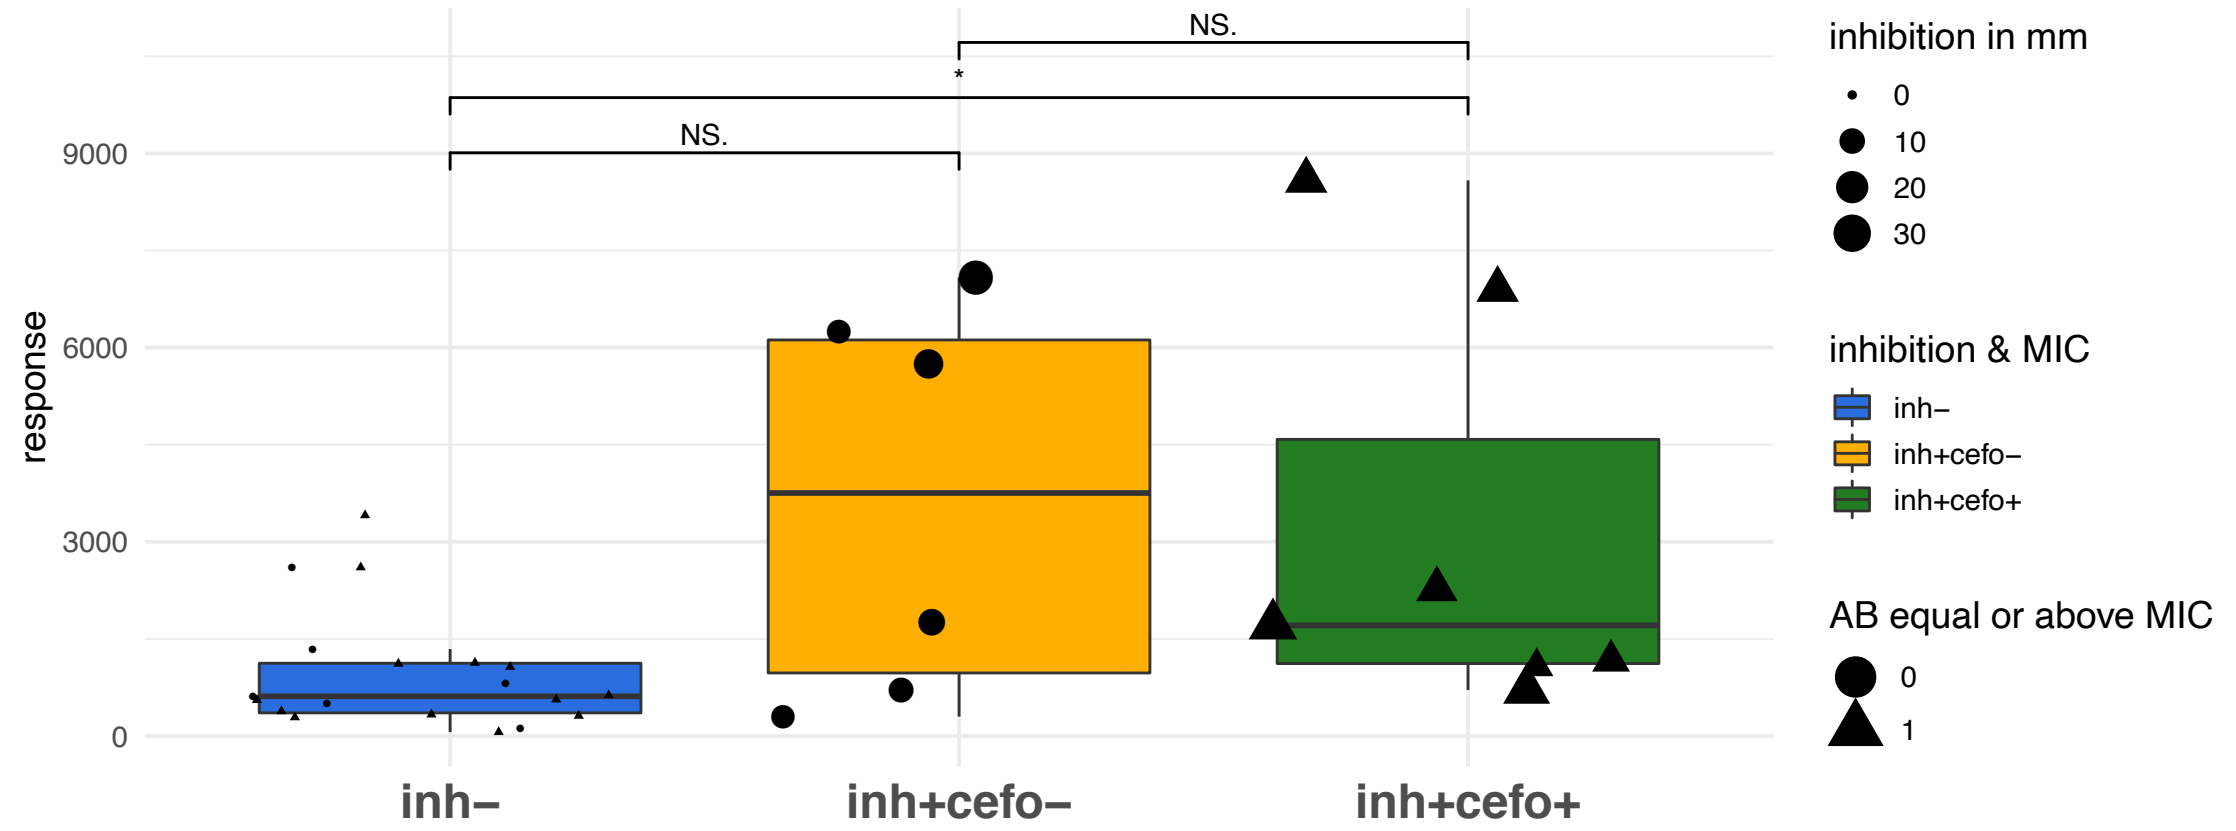

NS &gt;0.05, \* &lt;0.05, \*\* &lt;0.01, \*\*\* &lt;0.001

B

## AmiA

y-axis = log10-scale

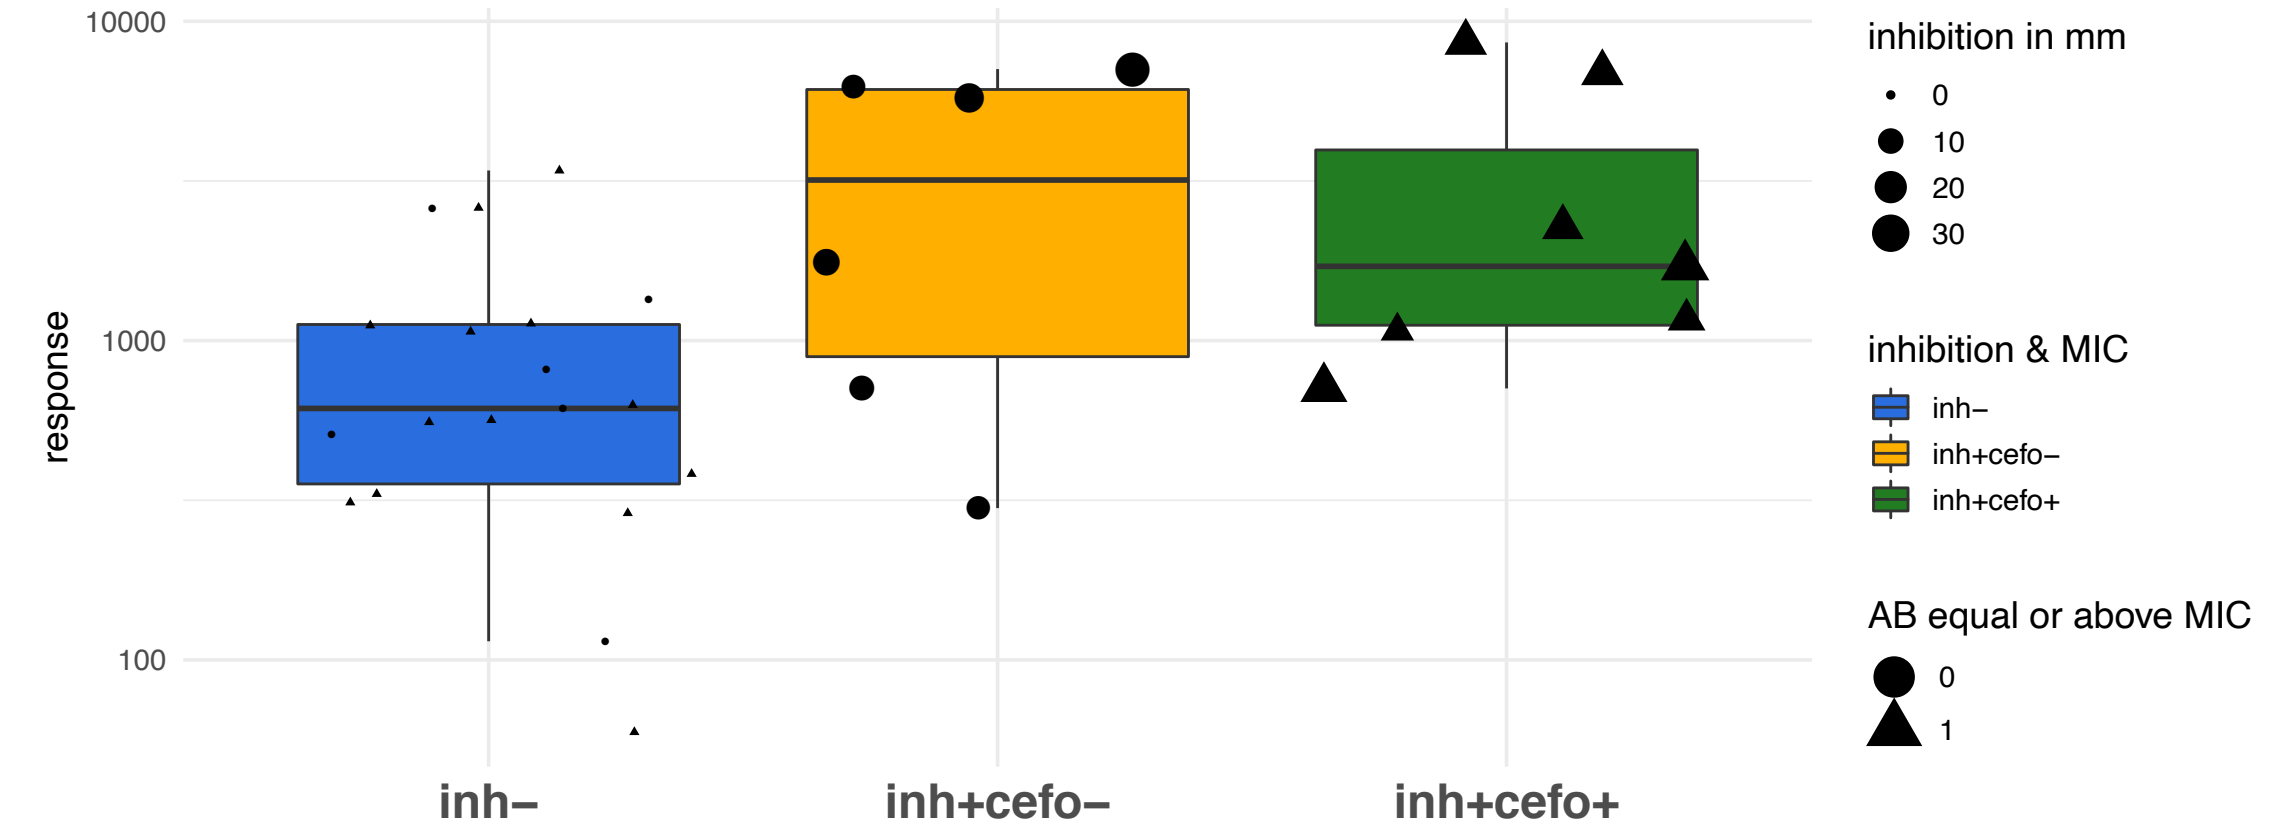

A

## Cbpc

unpaired wilcoxon test

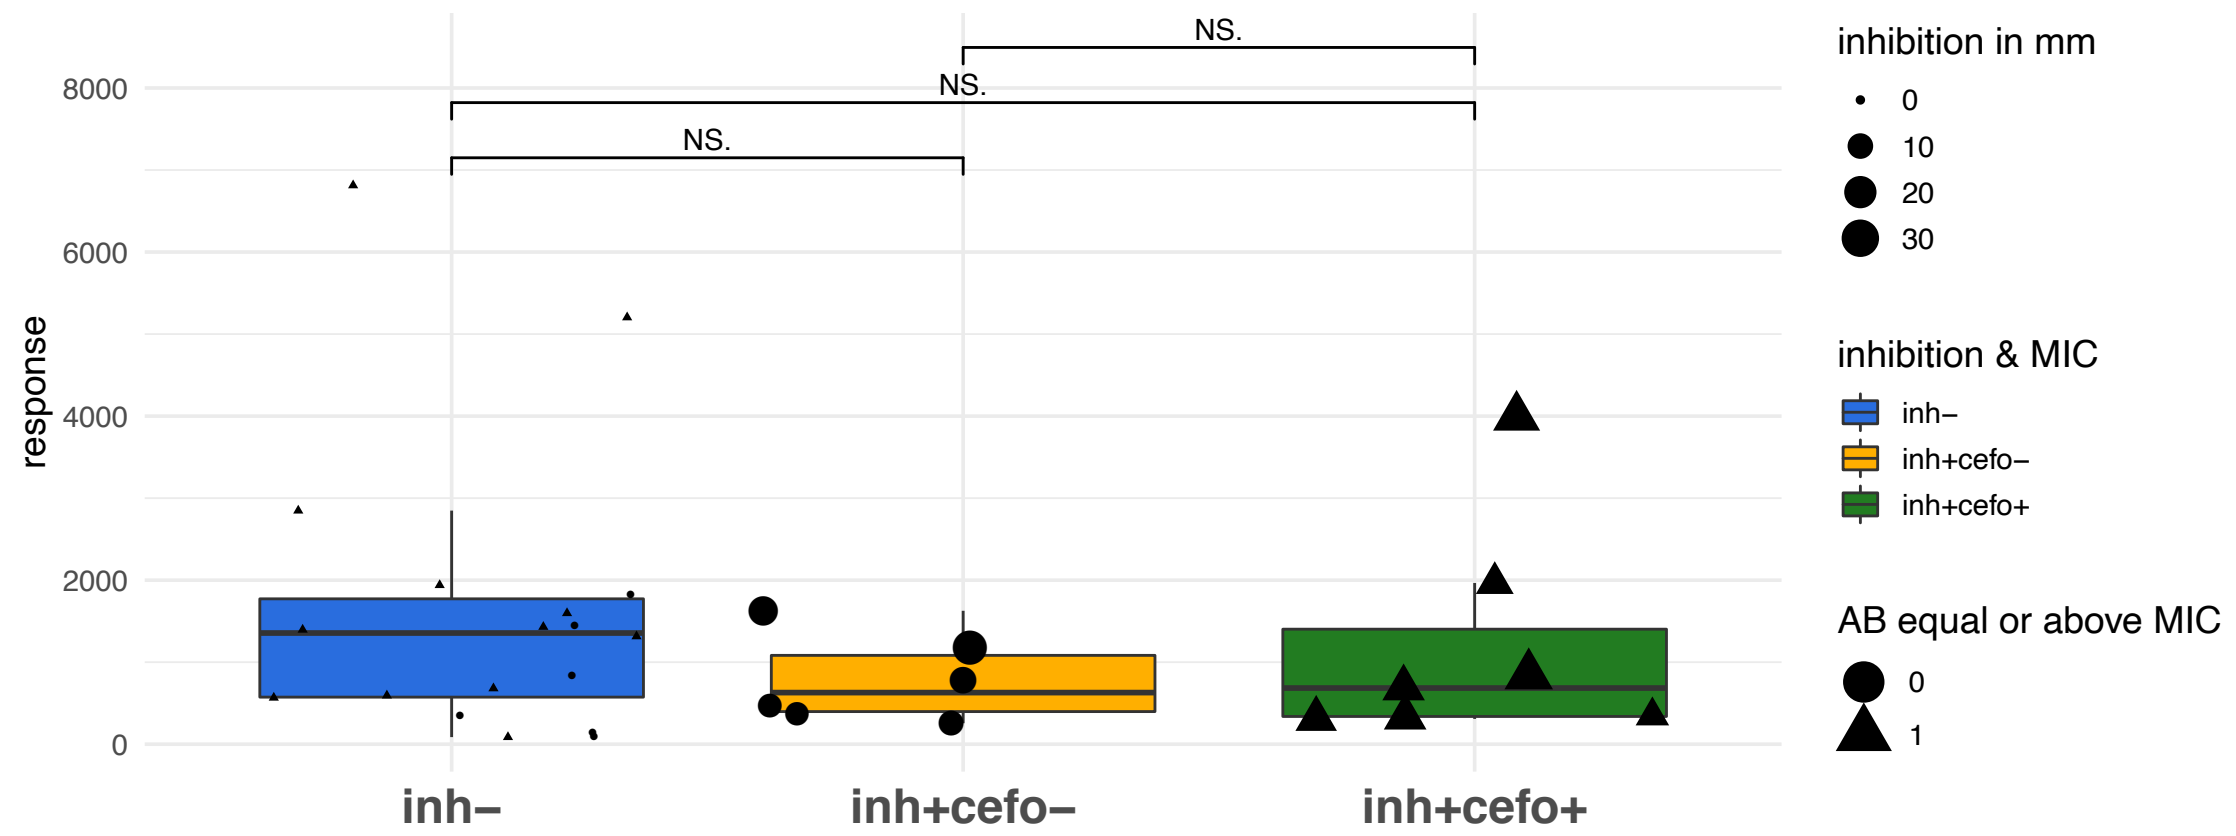

NS &gt;0.05, \* &lt;0.05, \*\* &lt;0.01, \*\*\* &lt;0.001

B

## Cbpc

y-axis = log10-scale

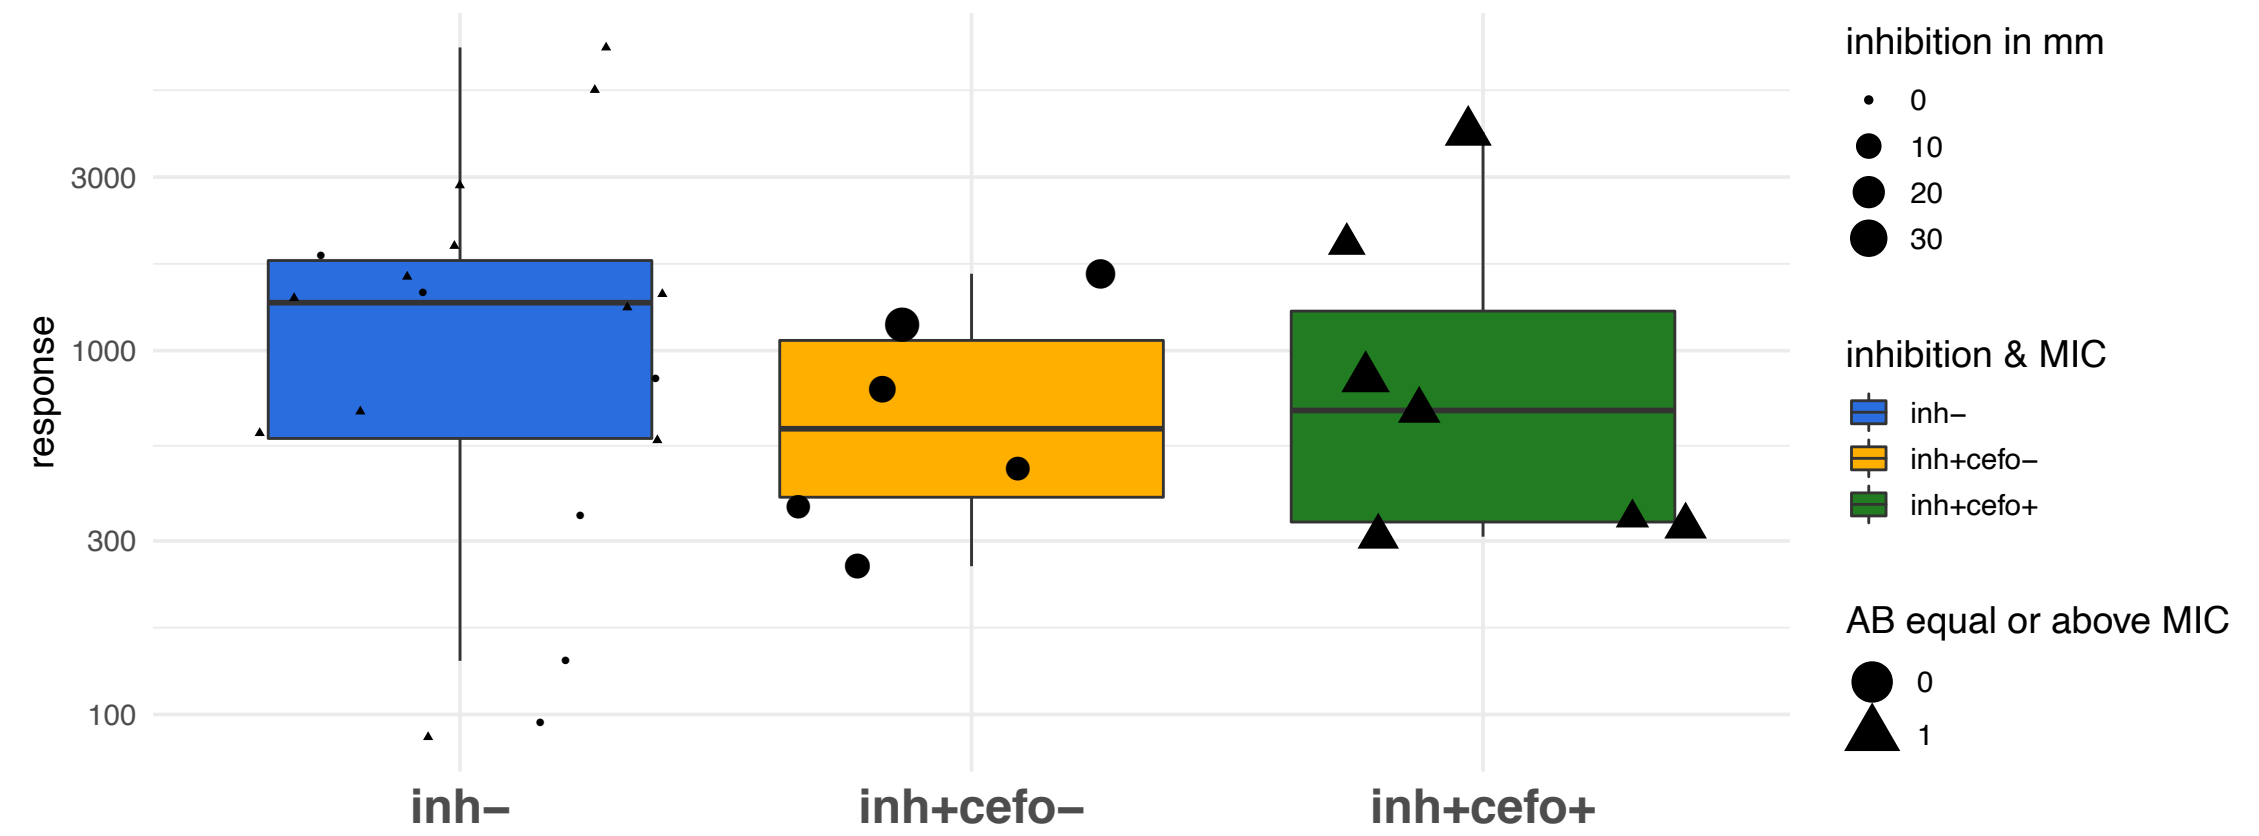

A

## Cbpe

unpaired wilcoxon test

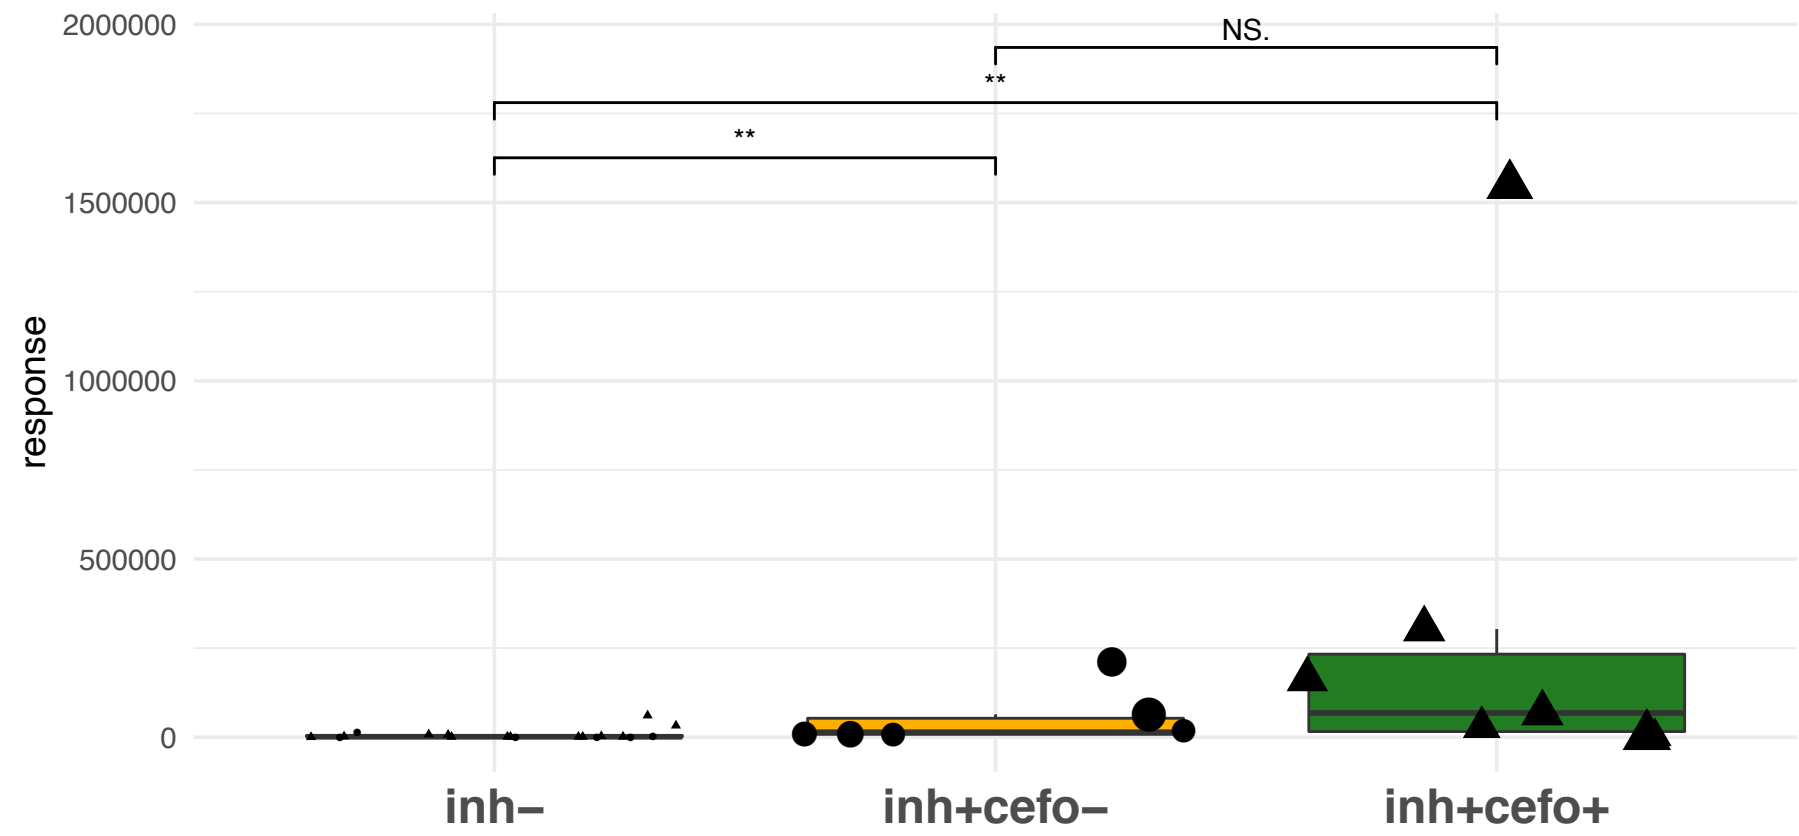

NS &gt;0.05, \* &lt;0.05, \*\* &lt;0.01, \*\*\* &lt;0.001

B

## Cbpe

y-axis = log10-scale

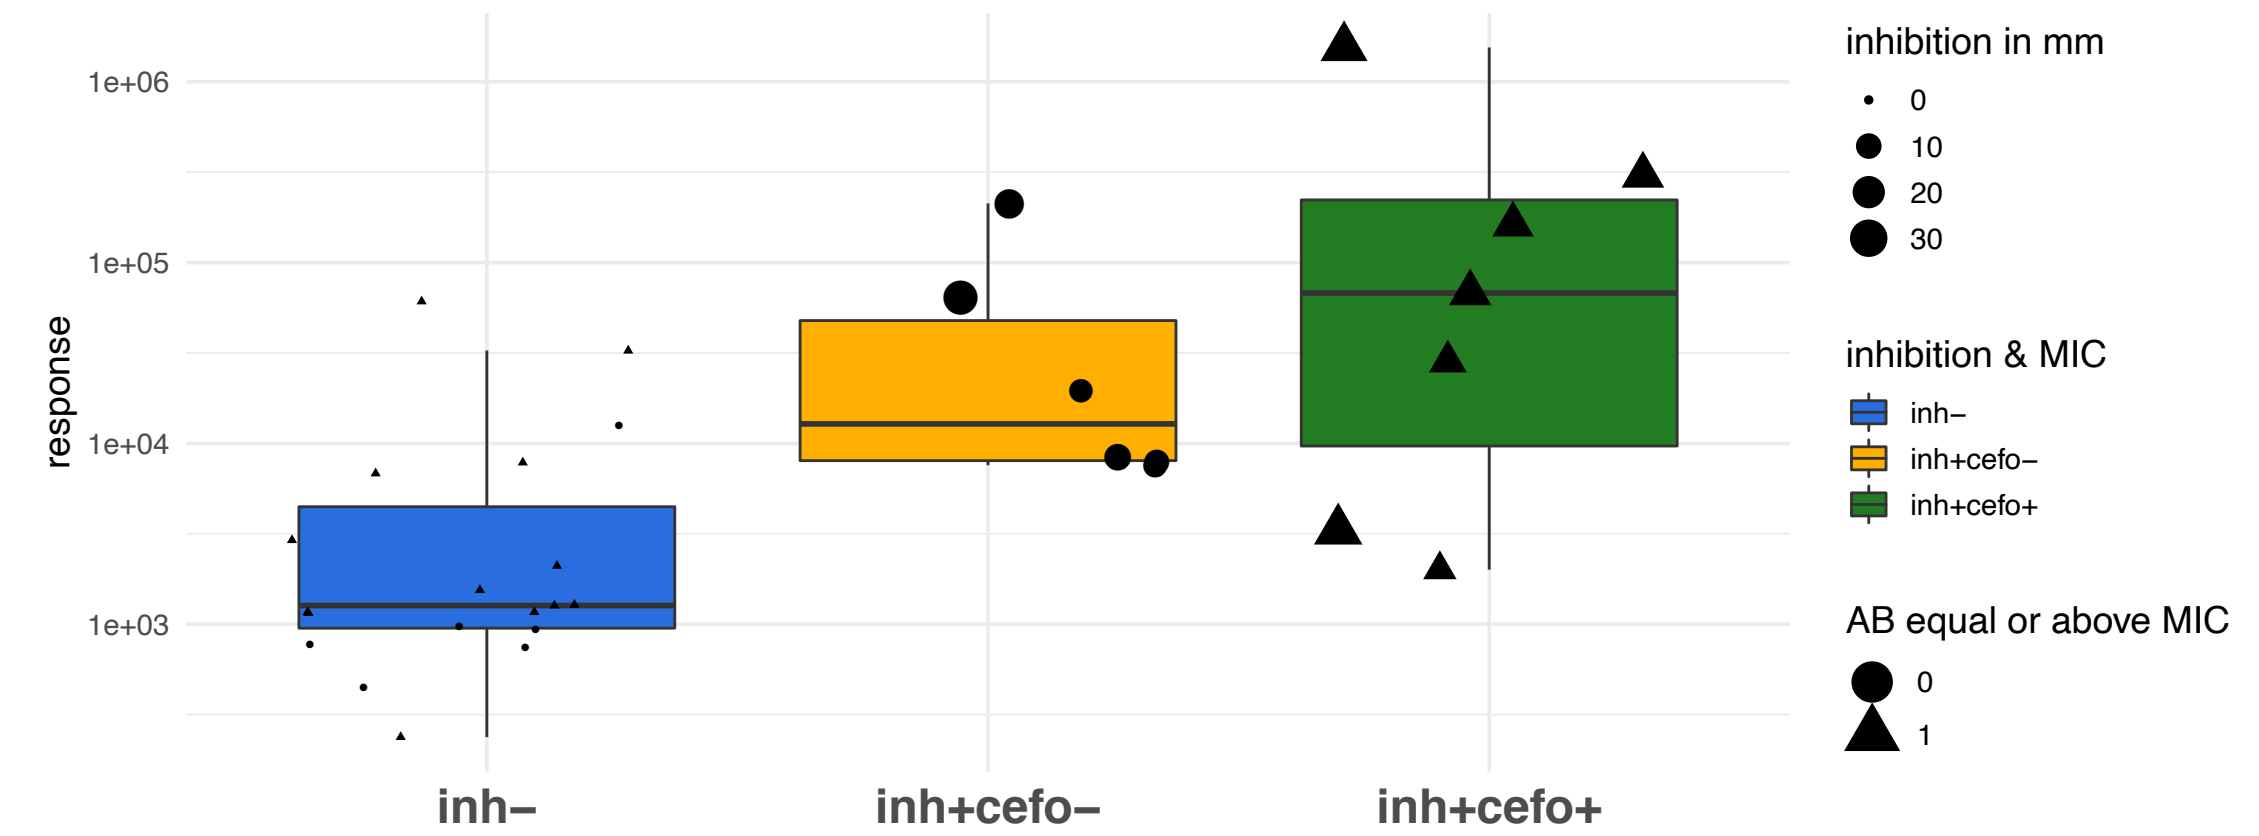



A

## CbpF

unpaired wilcoxon test

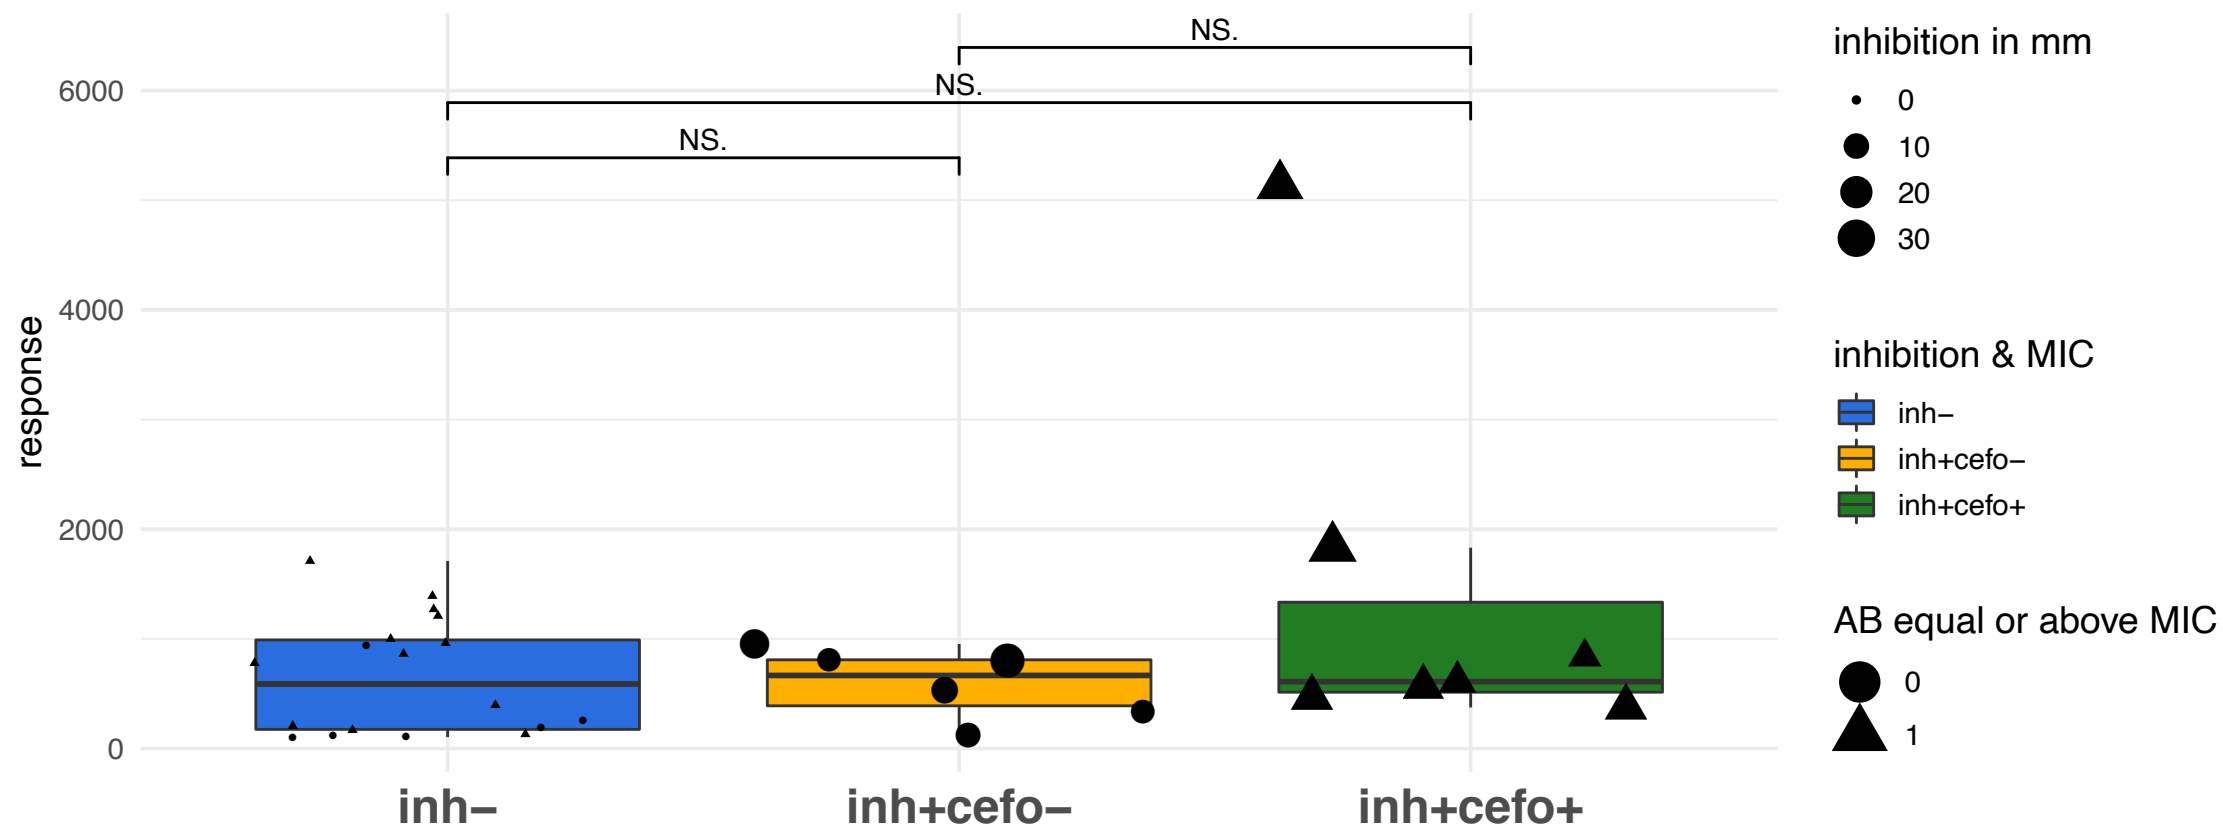

NS &gt;0.05, \* &lt;0.05, \*\* &lt;0.01, \*\*\* &lt;0.001

B

## CbpF

y-axis = log<sub>10</sub>-scale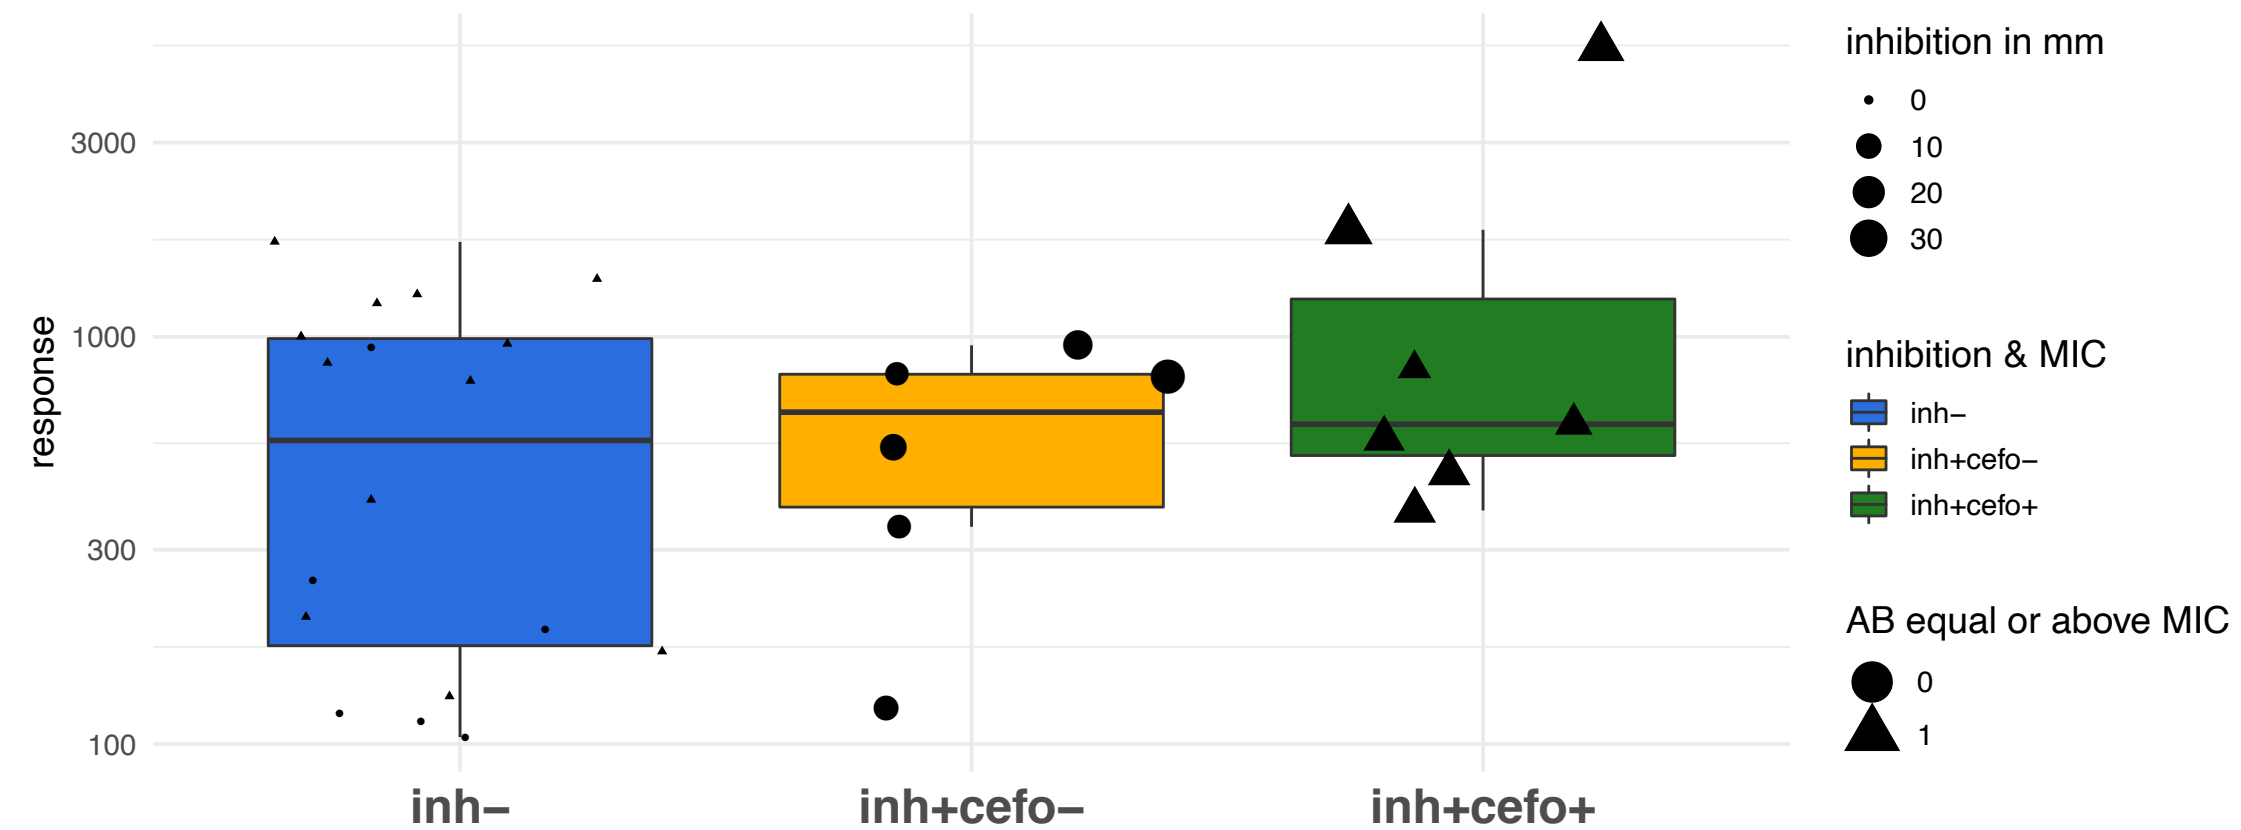

A

## CbpL

unpaired wilcoxon test

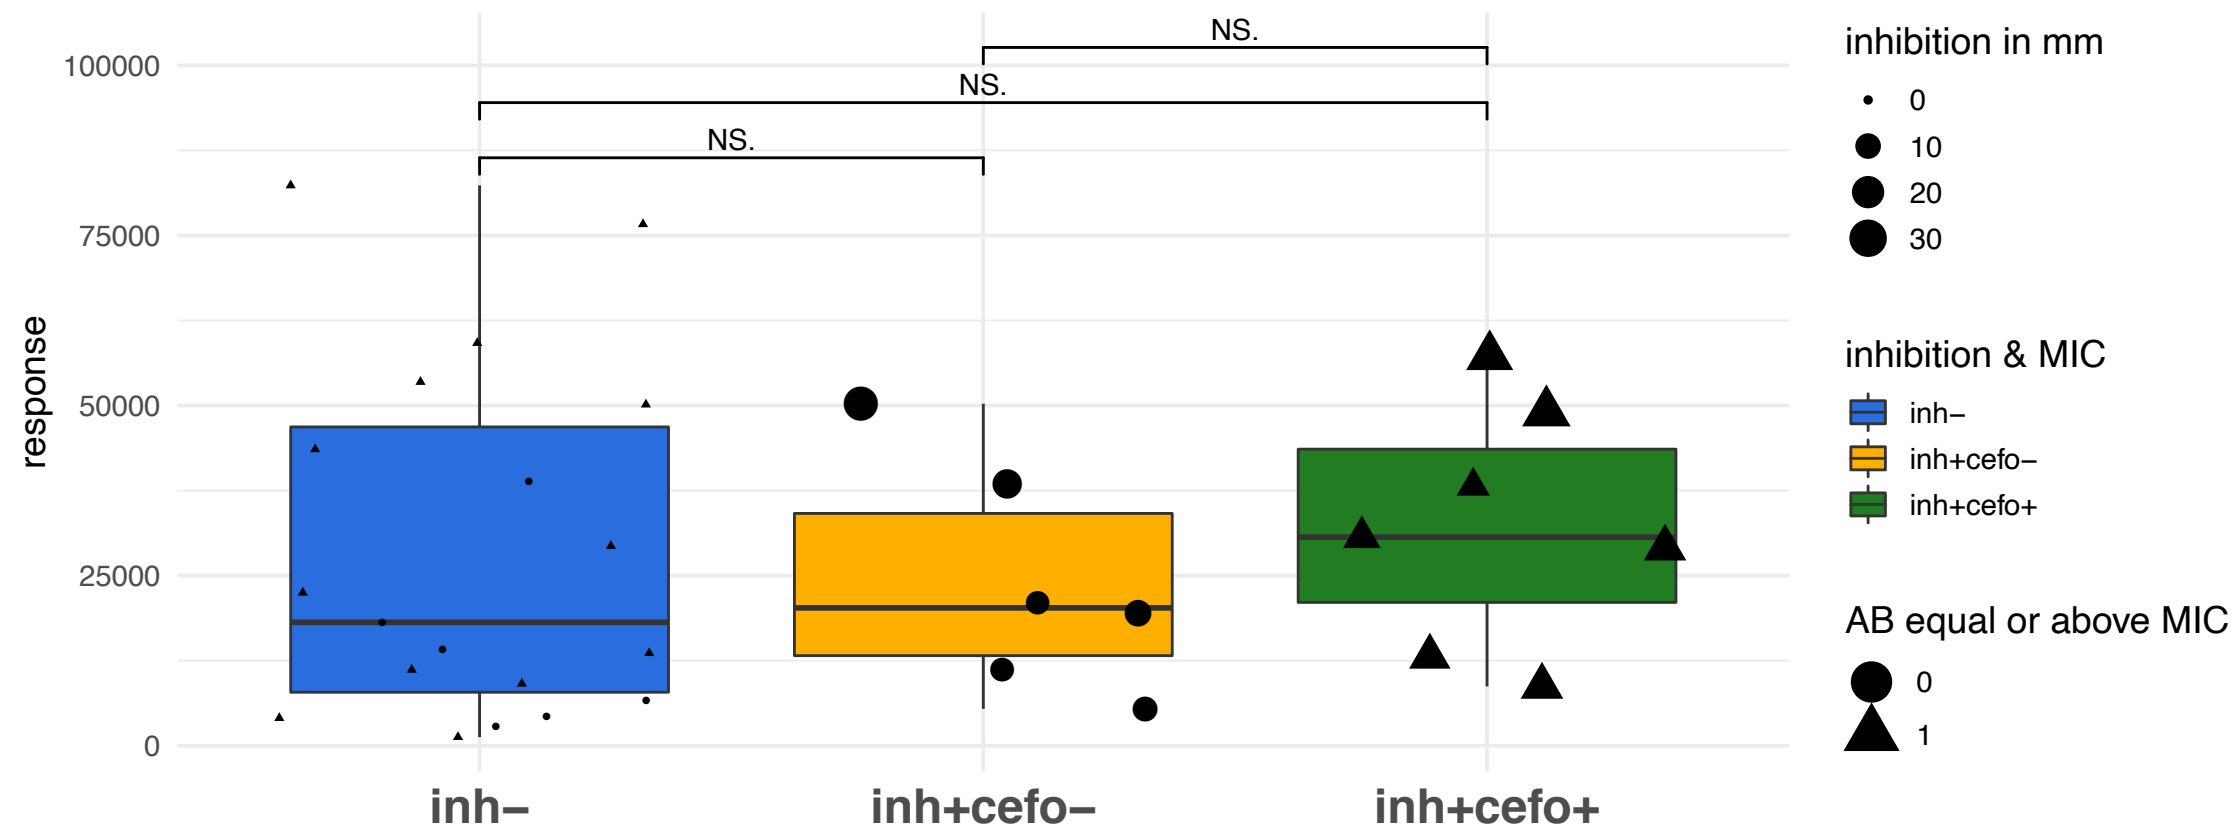

NS &gt;0.05, \* &lt;0.05, \*\* &lt;0.01, \*\*\* &lt;0.001

B

## CbpL

y-axis = log<sub>10</sub>-scale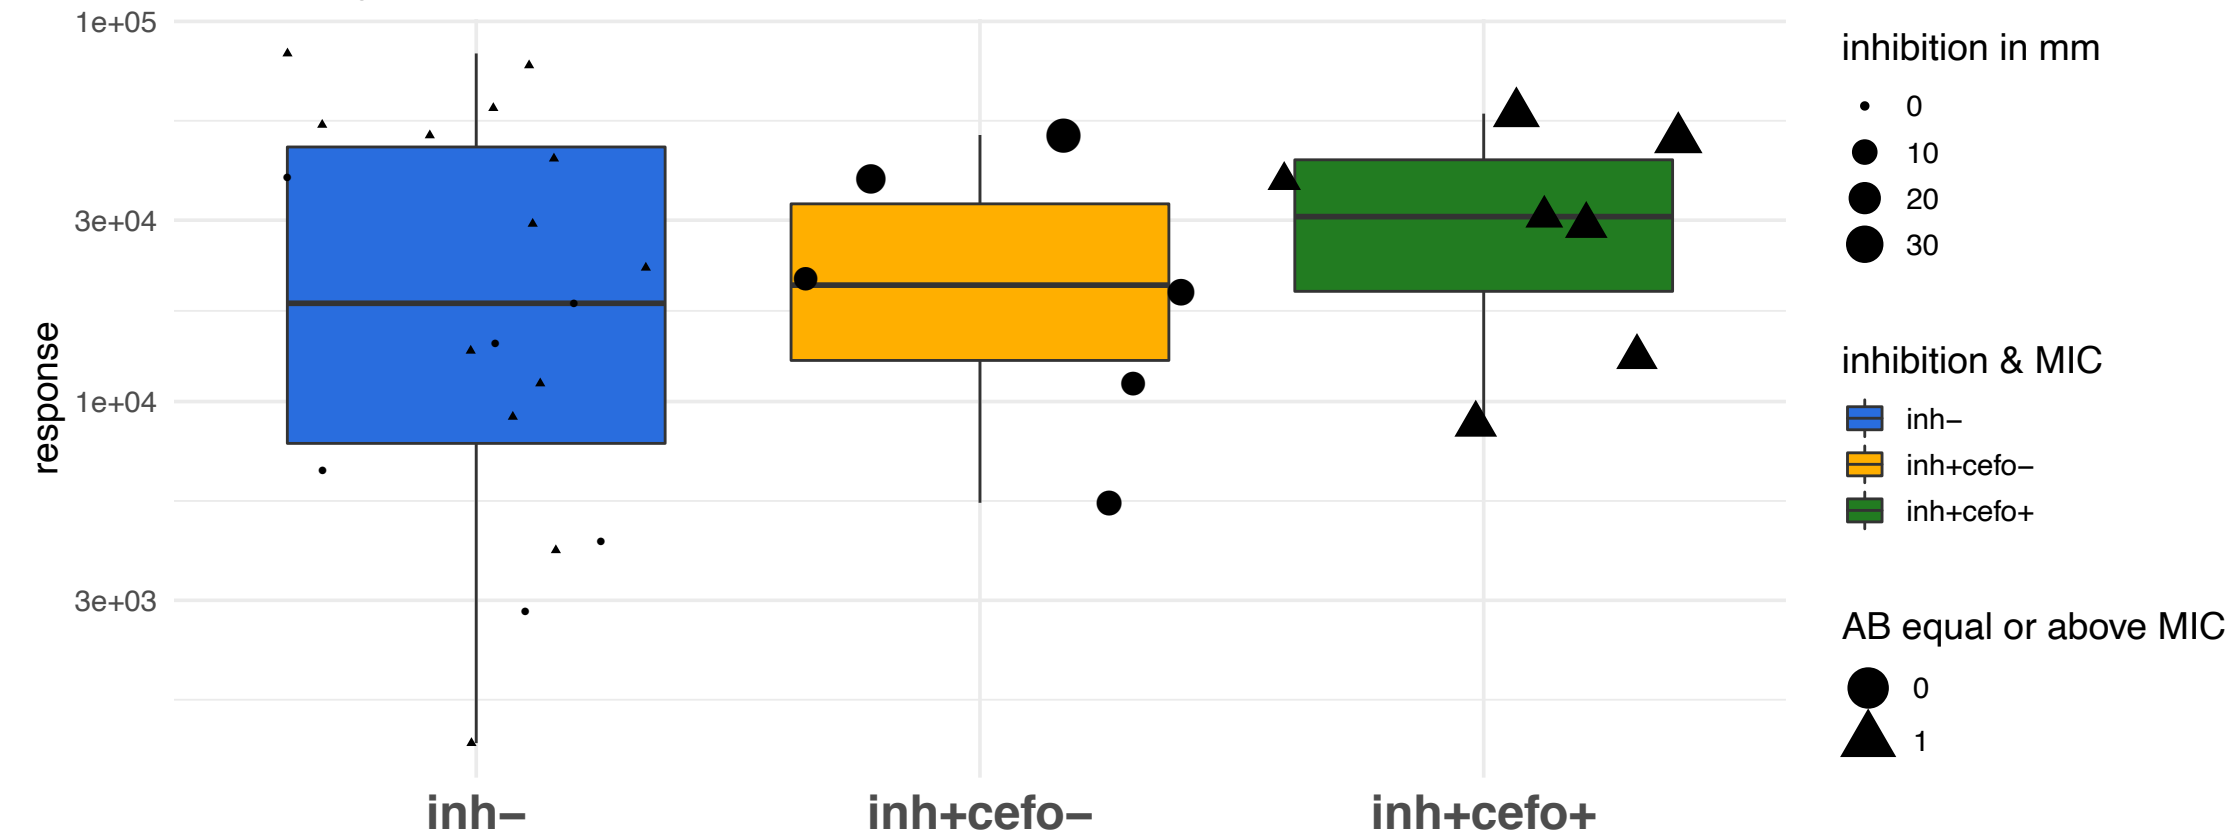

A

# Chimeric\_\_PspA\_PspC

unpaired wilcoxon test

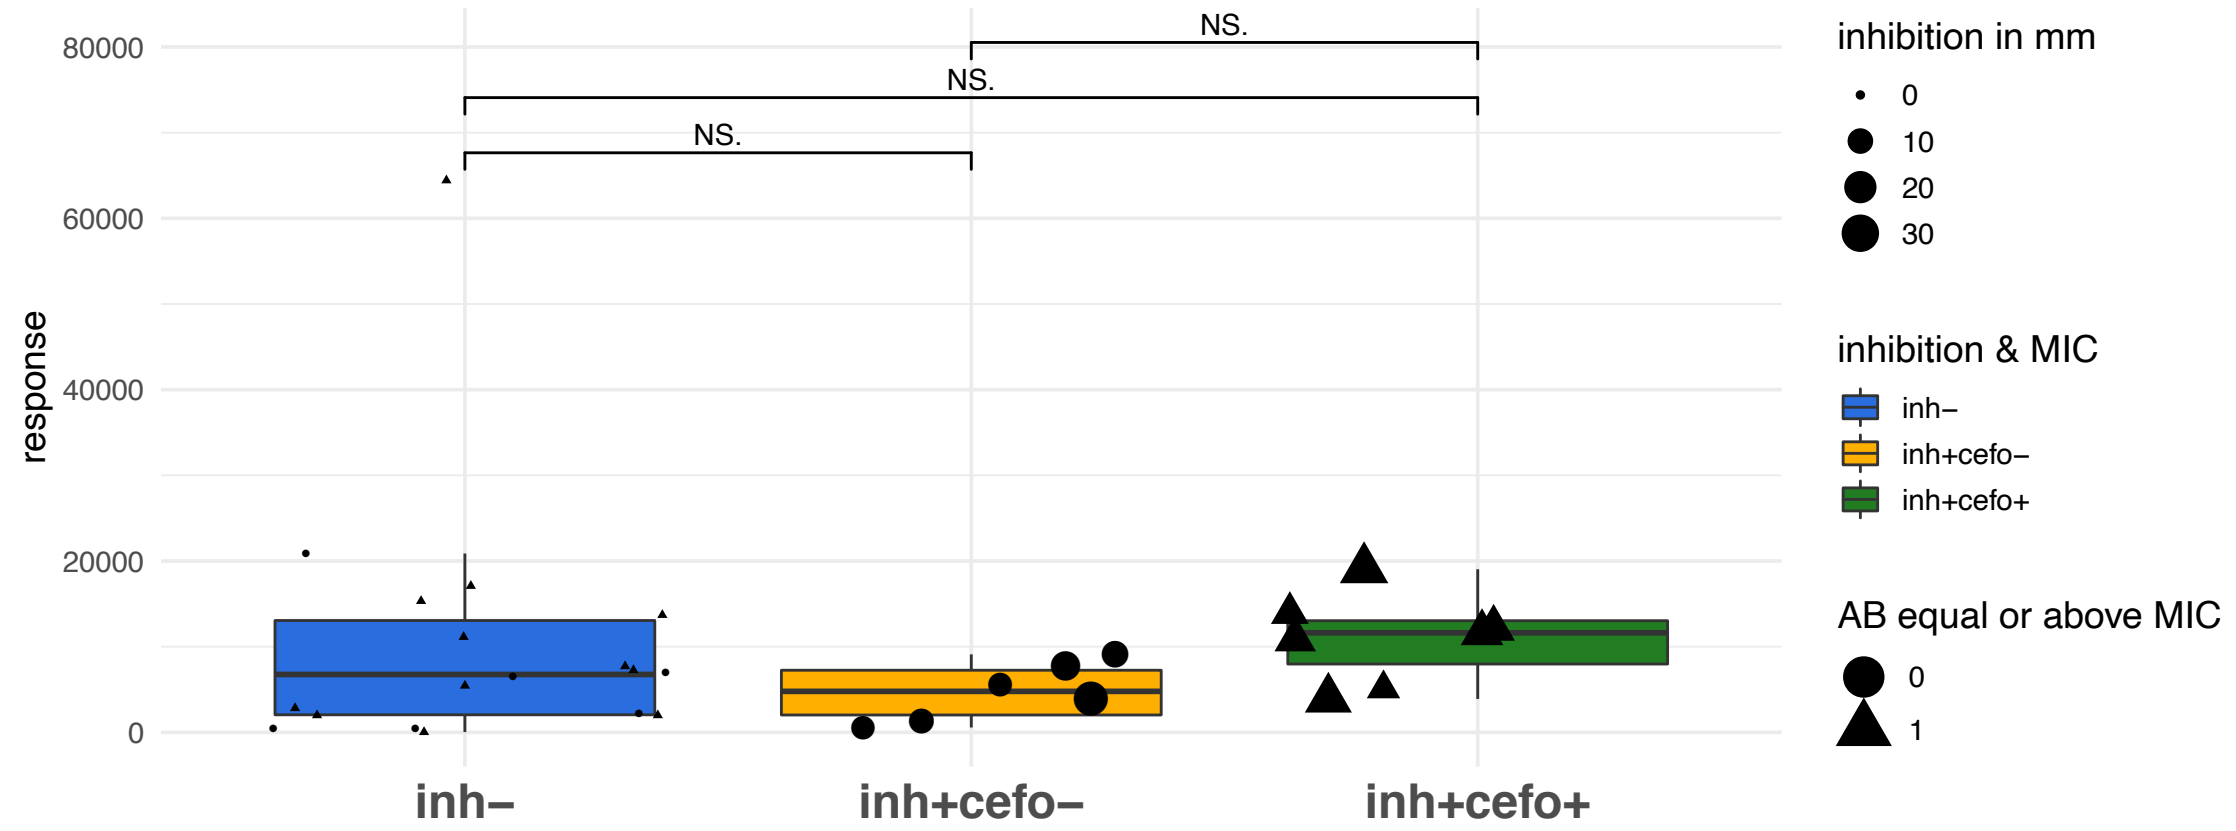

NS >0.05, \* <0.05, \*\* <0.01, \*\*\* <0.001

B

# Chimeric\_\_PspA\_PspC

y-axis = log<sub>10</sub>-scale

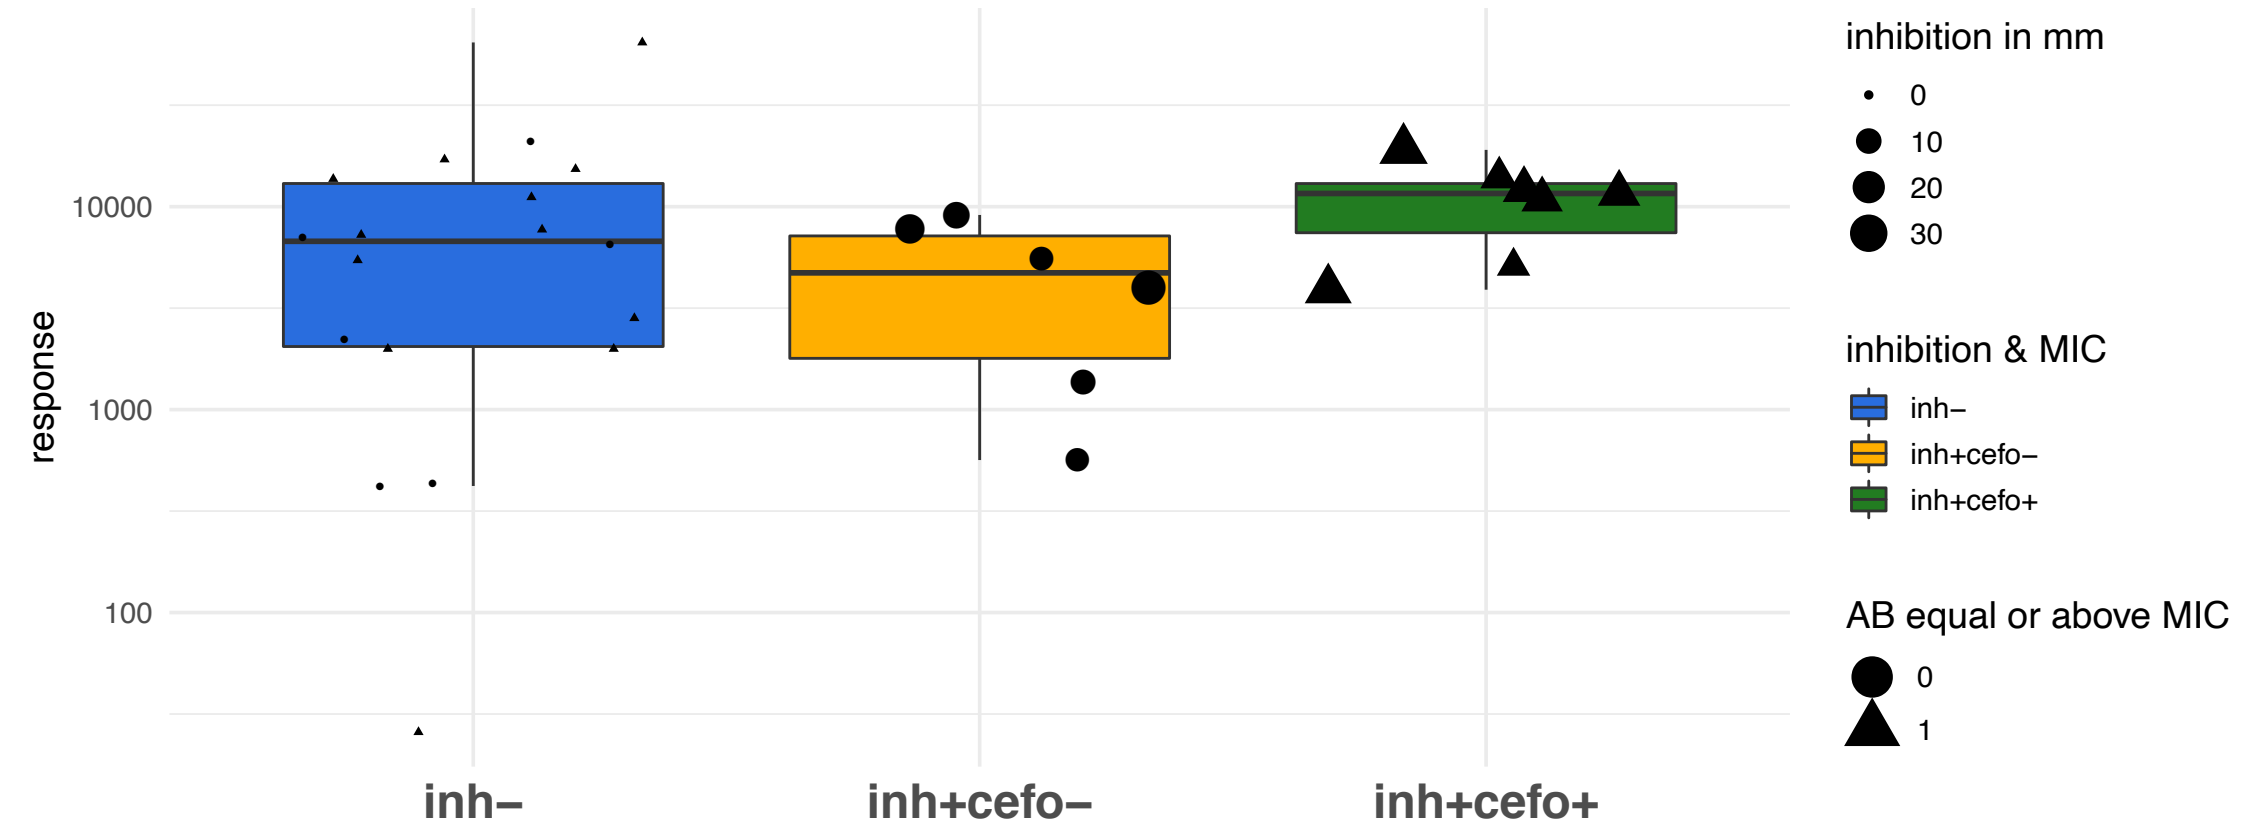

A

**DacA**

unpaired wilcoxon test

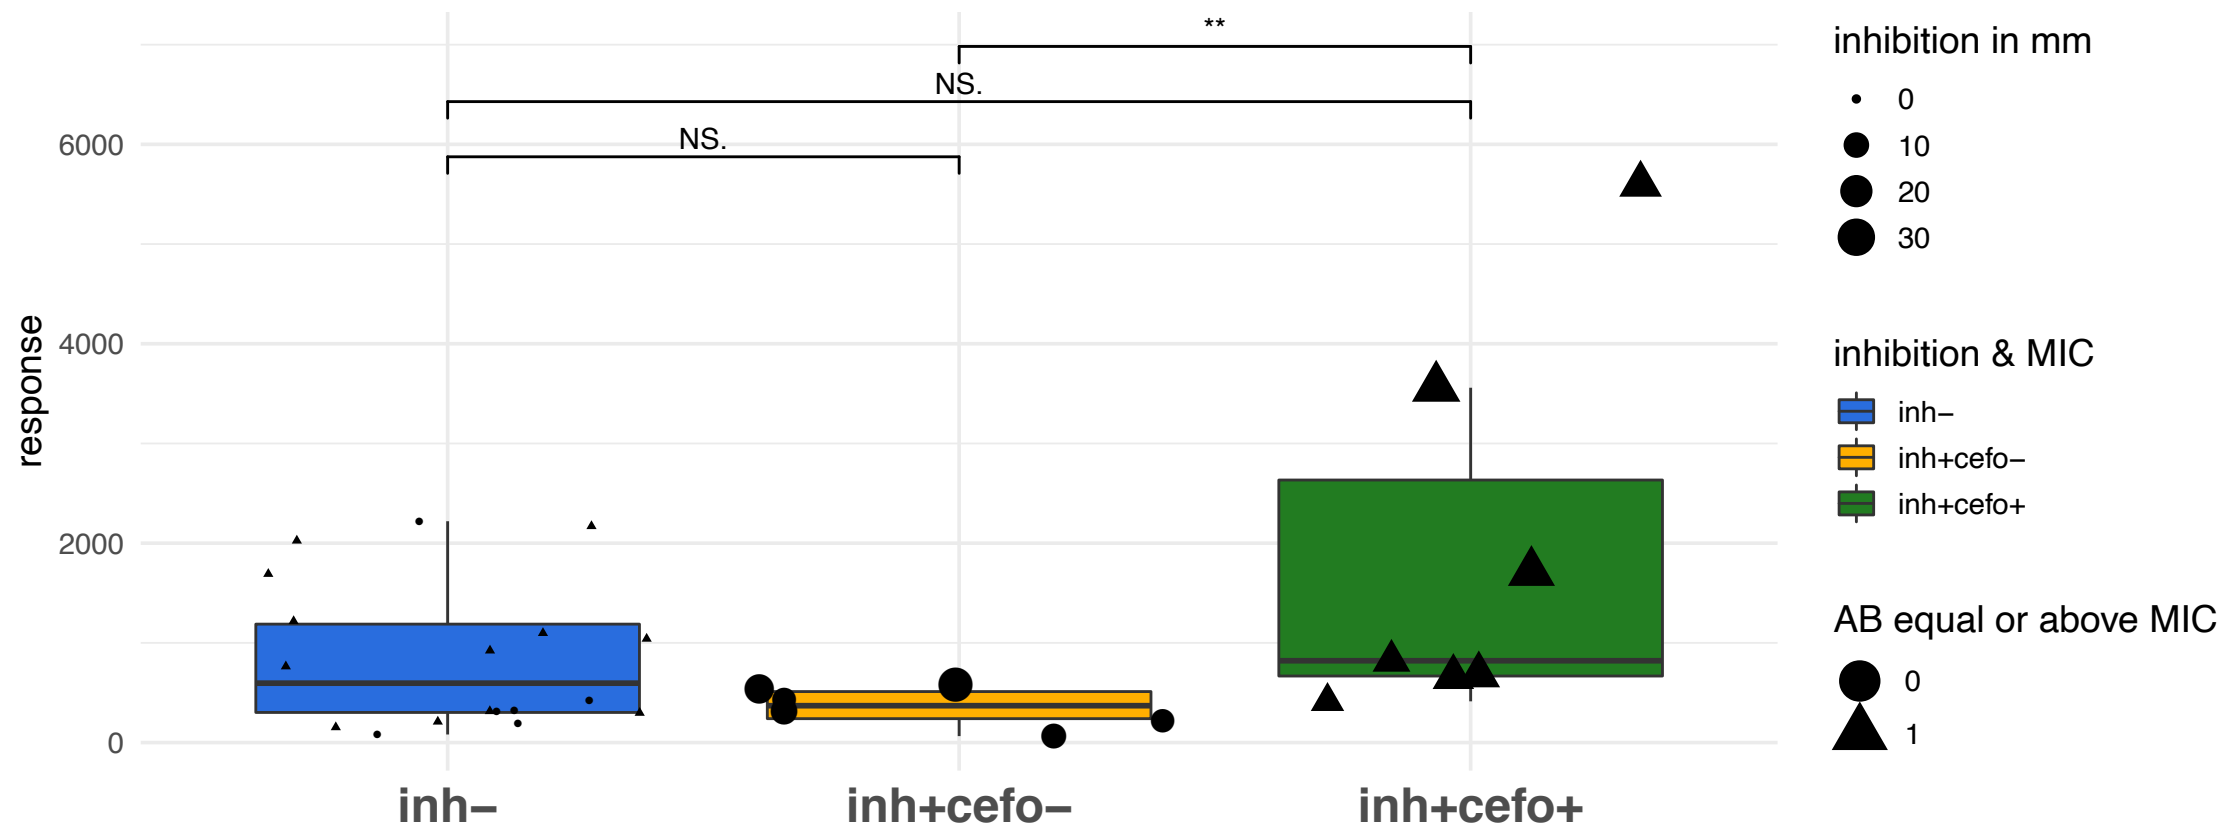

NS &gt;0.05, \* &lt;0.05, \*\* &lt;0.01, \*\*\* &lt;0.001

B

**DacA**y-axis = log<sub>10</sub>-scale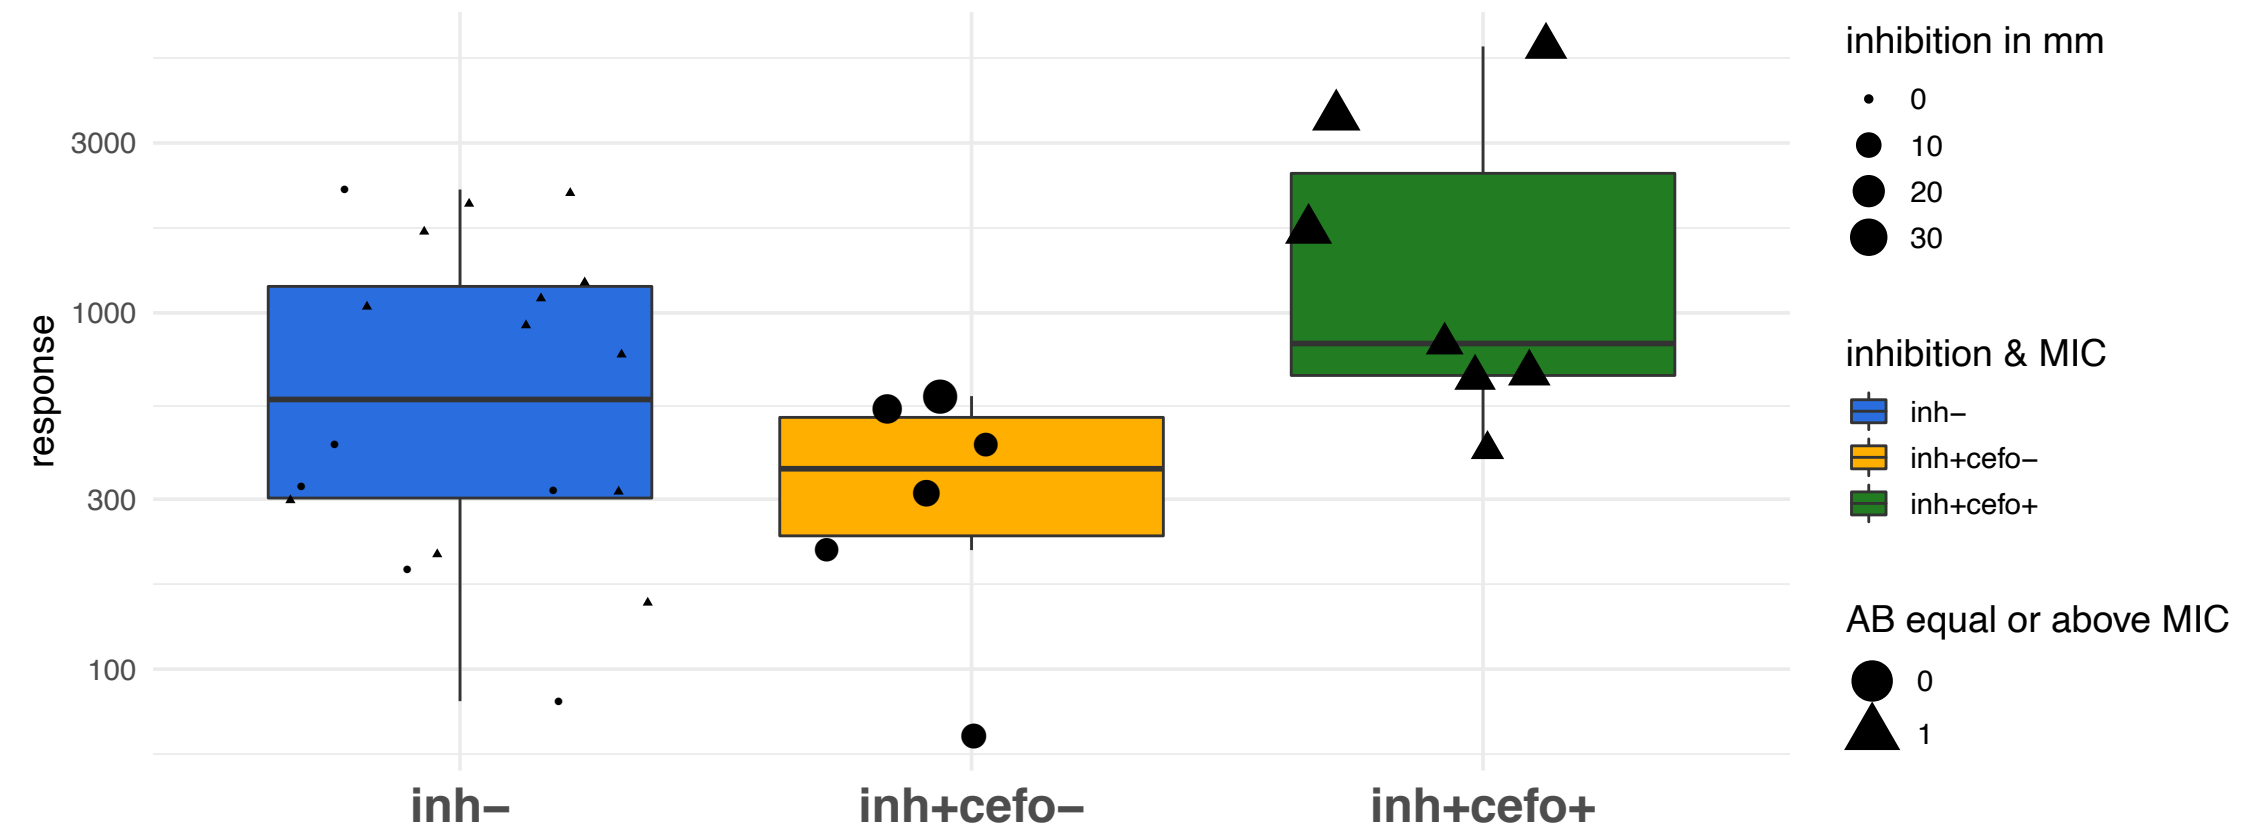

A

**DacB**

unpaired wilcoxon test

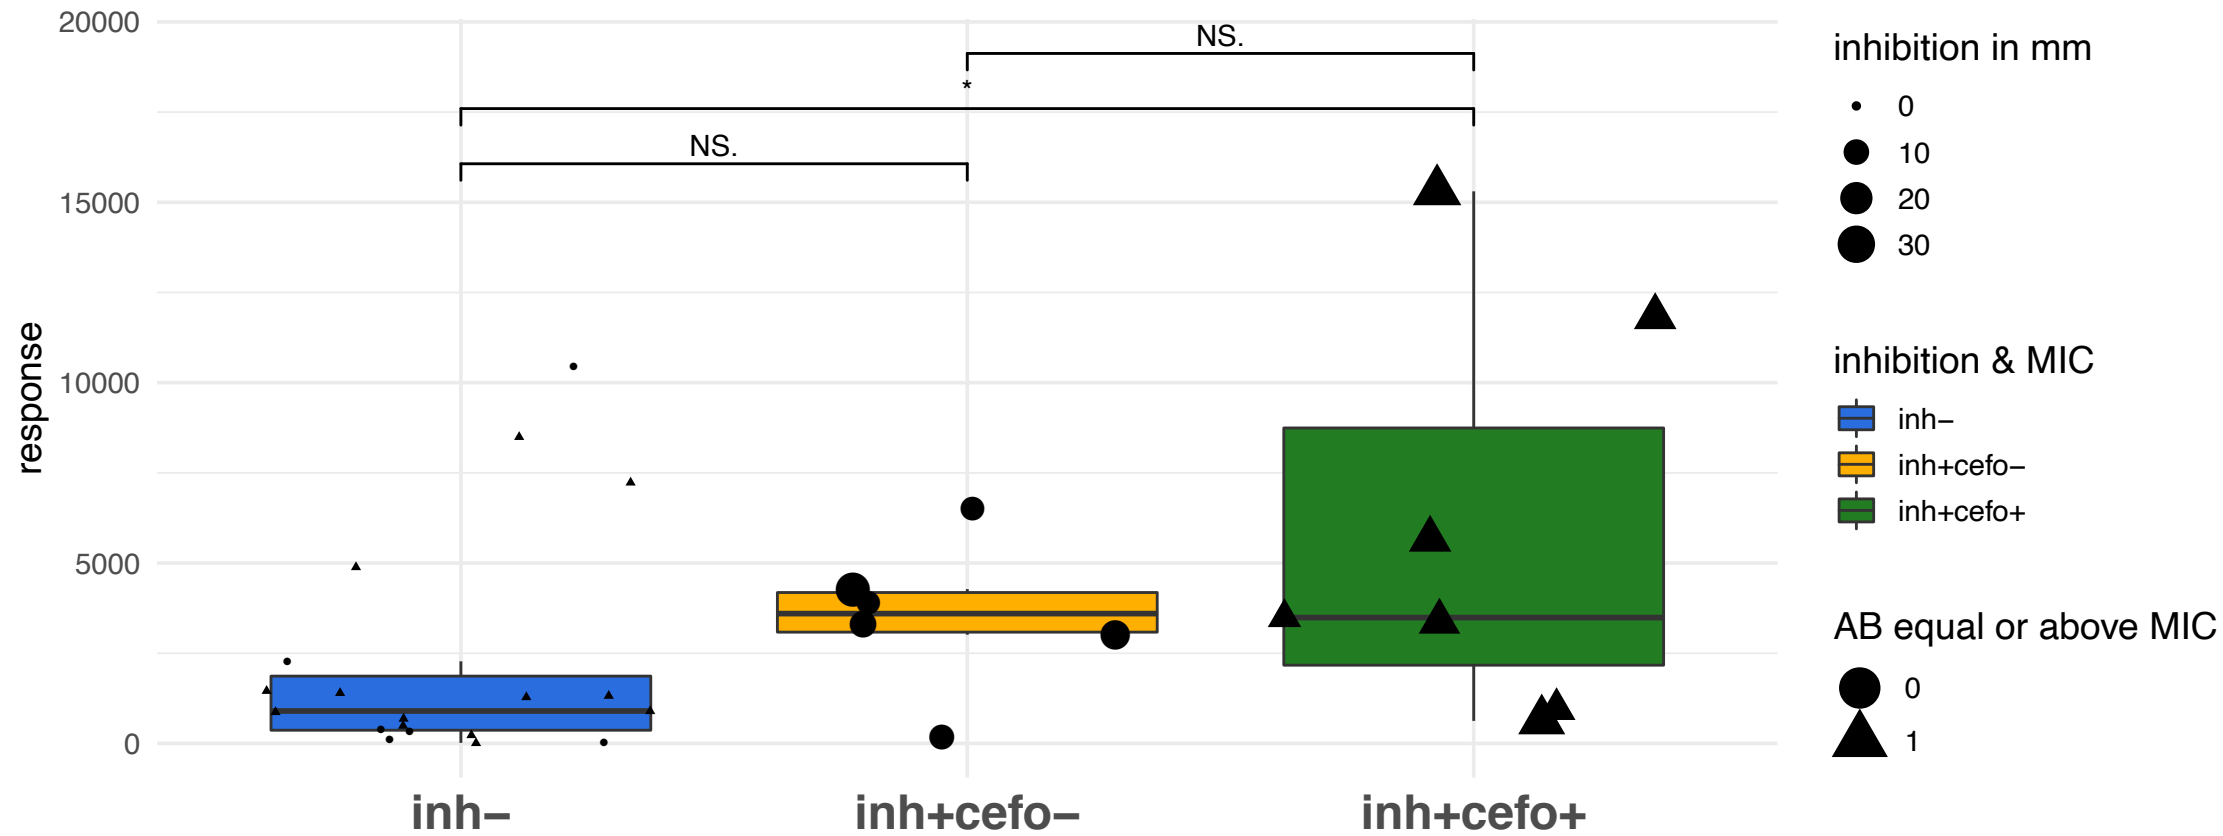

NS &gt;0.05, \* &lt;0.05, \*\* &lt;0.01, \*\*\* &lt;0.001

B

**DacB**y-axis = log<sub>10</sub>-scale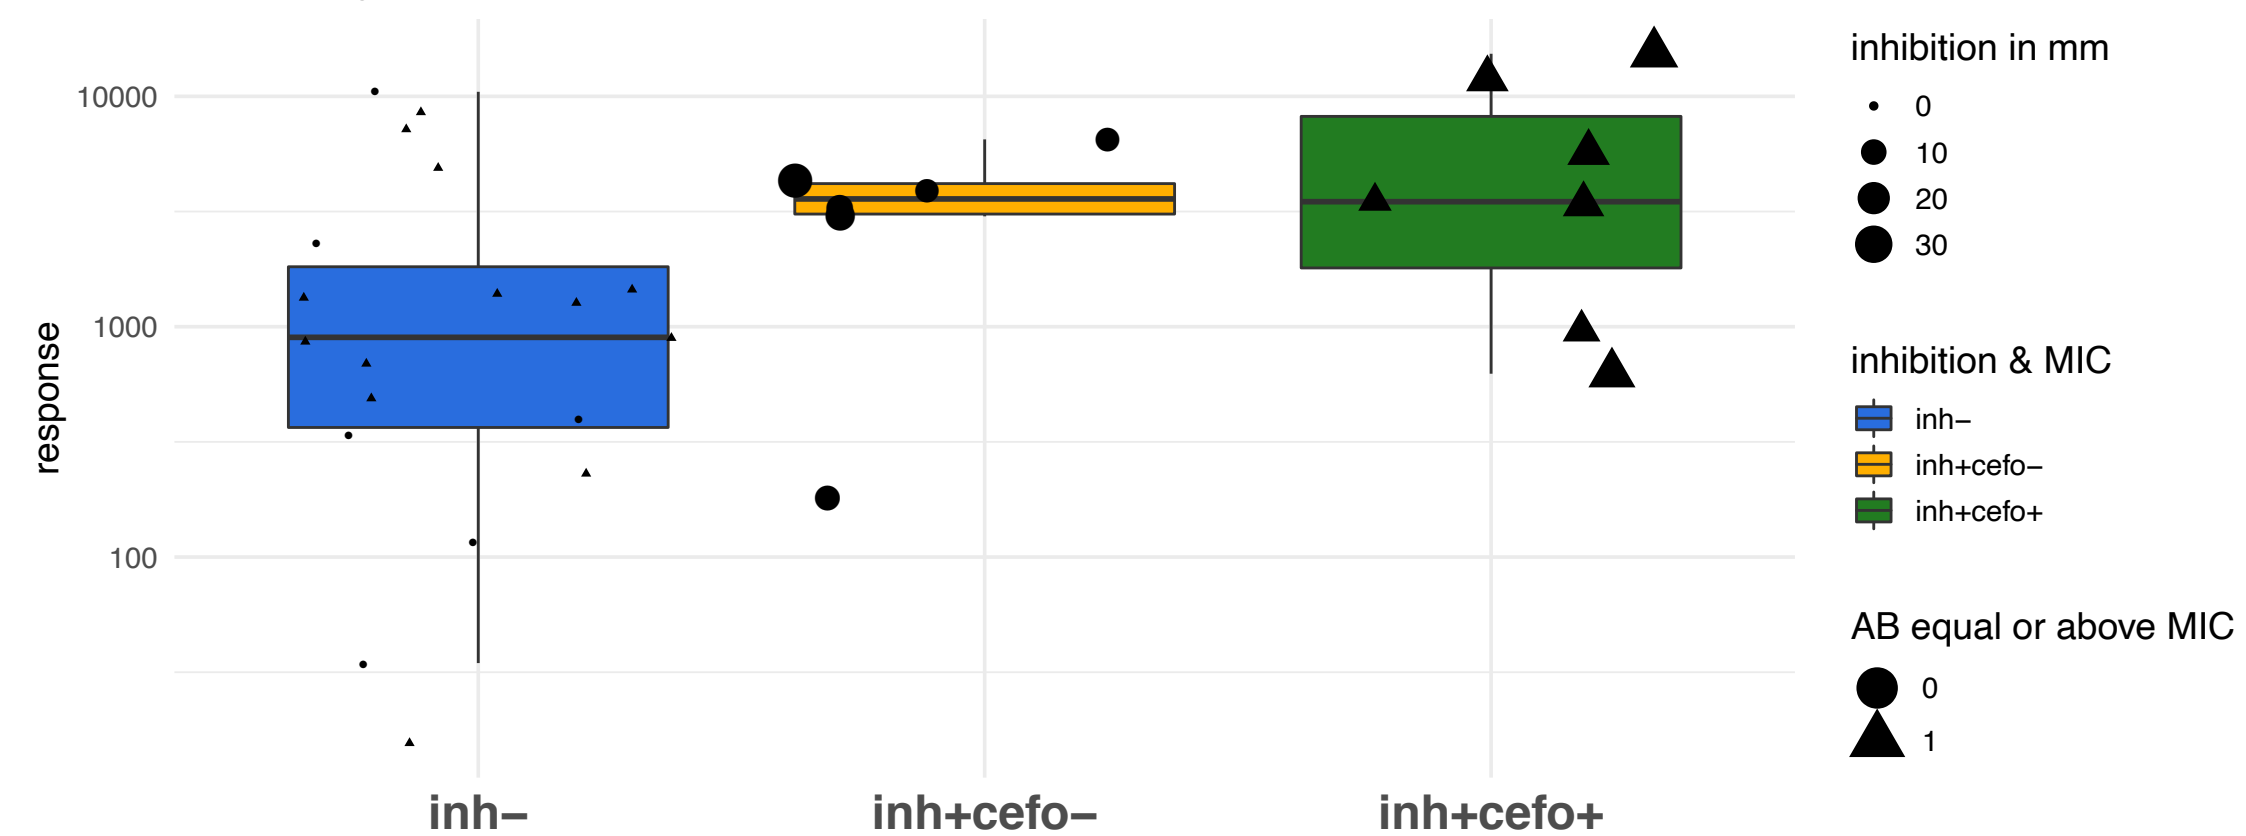

A

## Eno

unpaired wilcoxon test

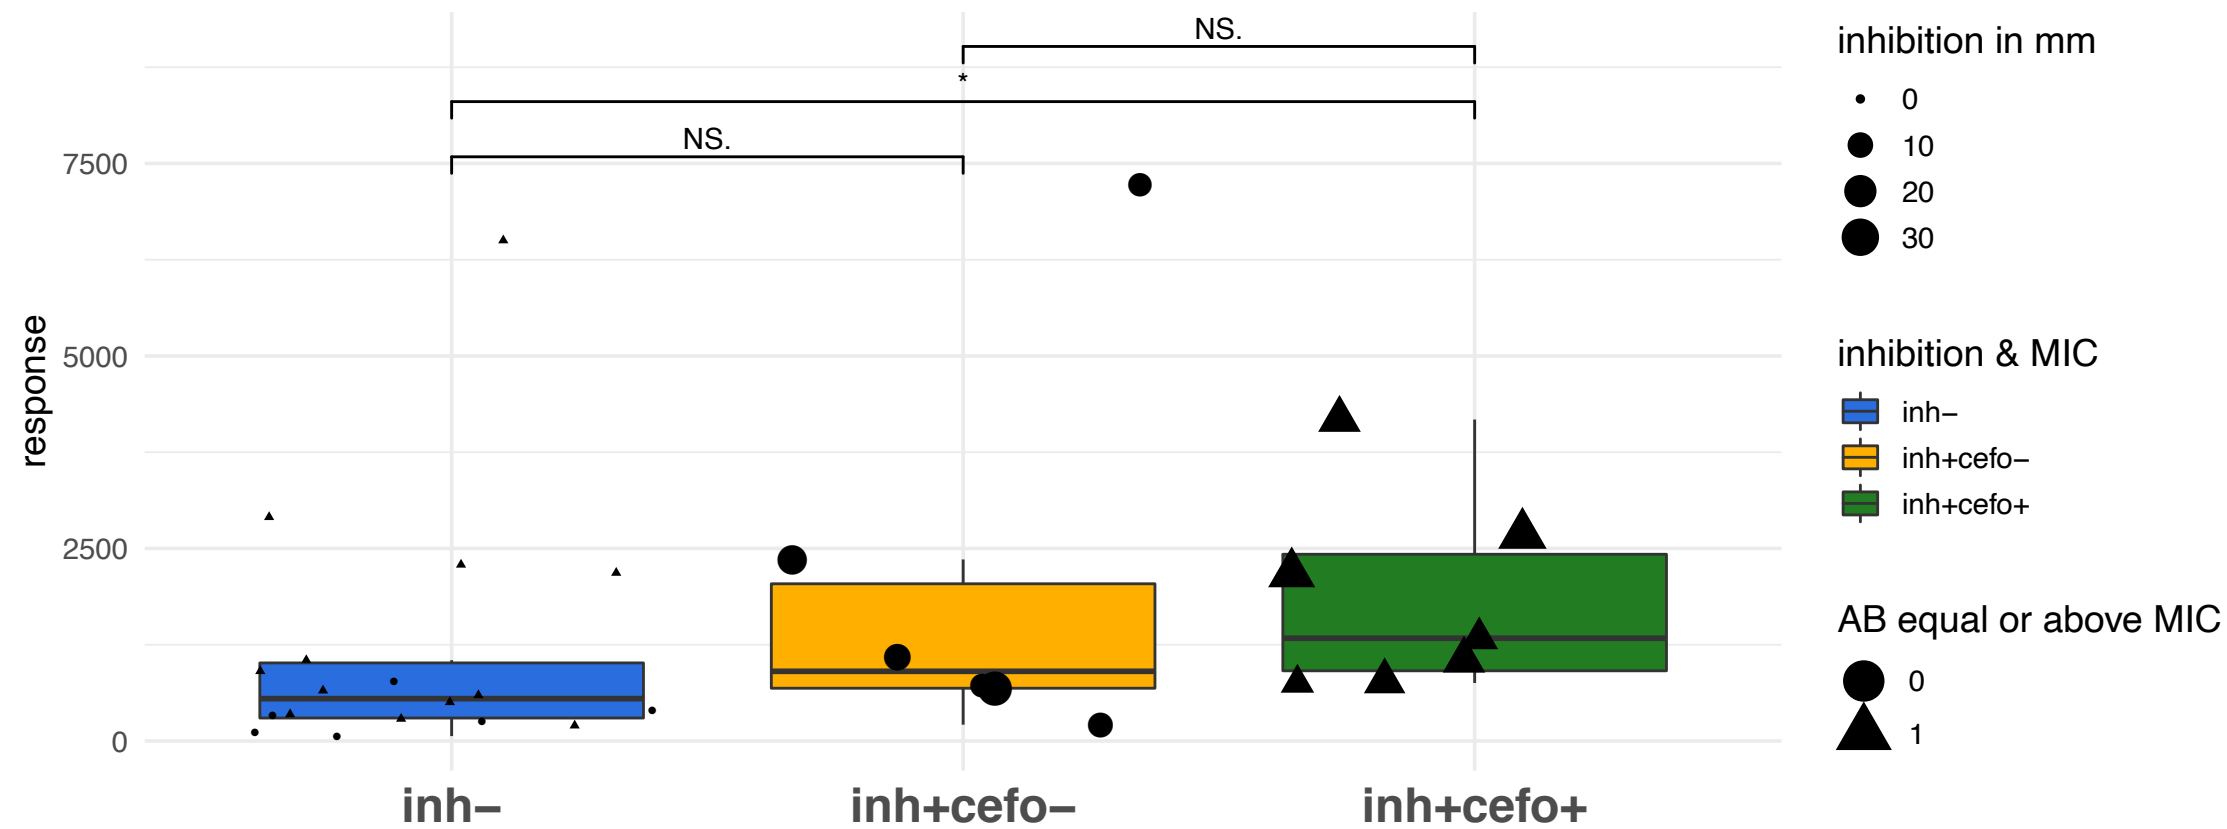

NS &gt;0.05, \* &lt;0.05, \*\* &lt;0.01, \*\*\* &lt;0.001

B

## Eno

y-axis = log<sub>10</sub>-scale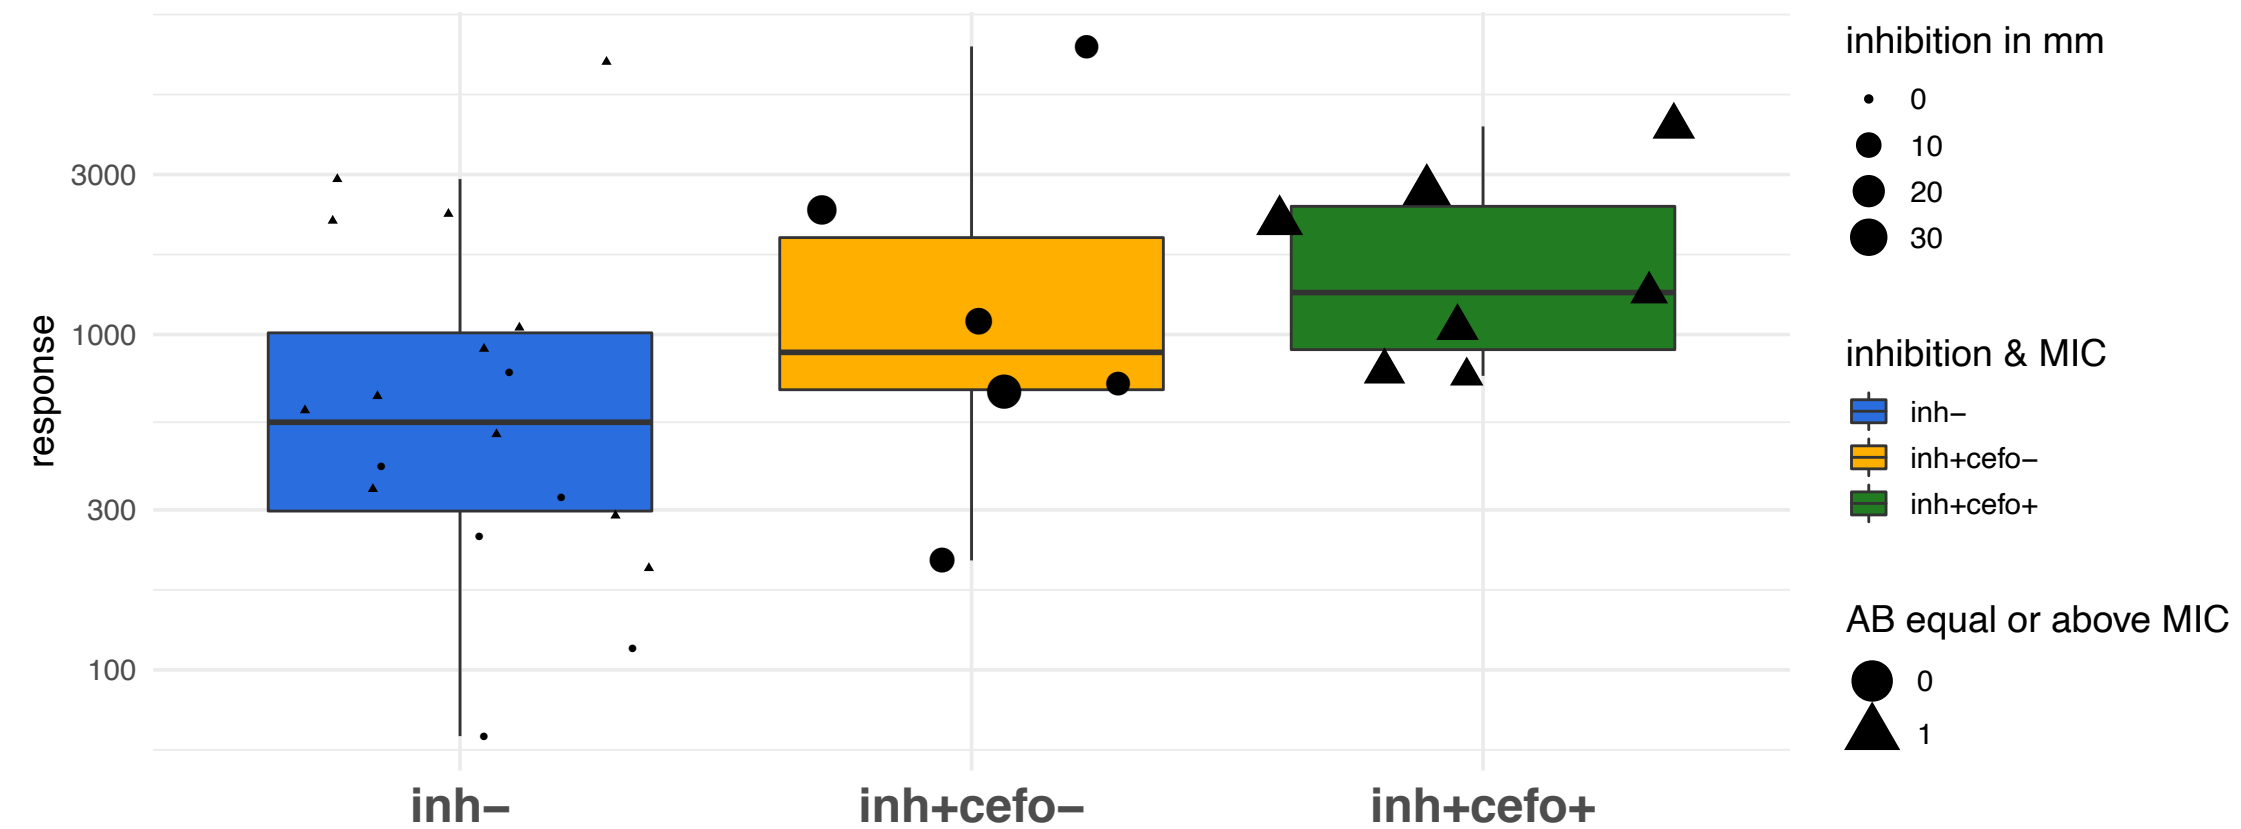

A

**EtrX1**

unpaired wilcoxon test

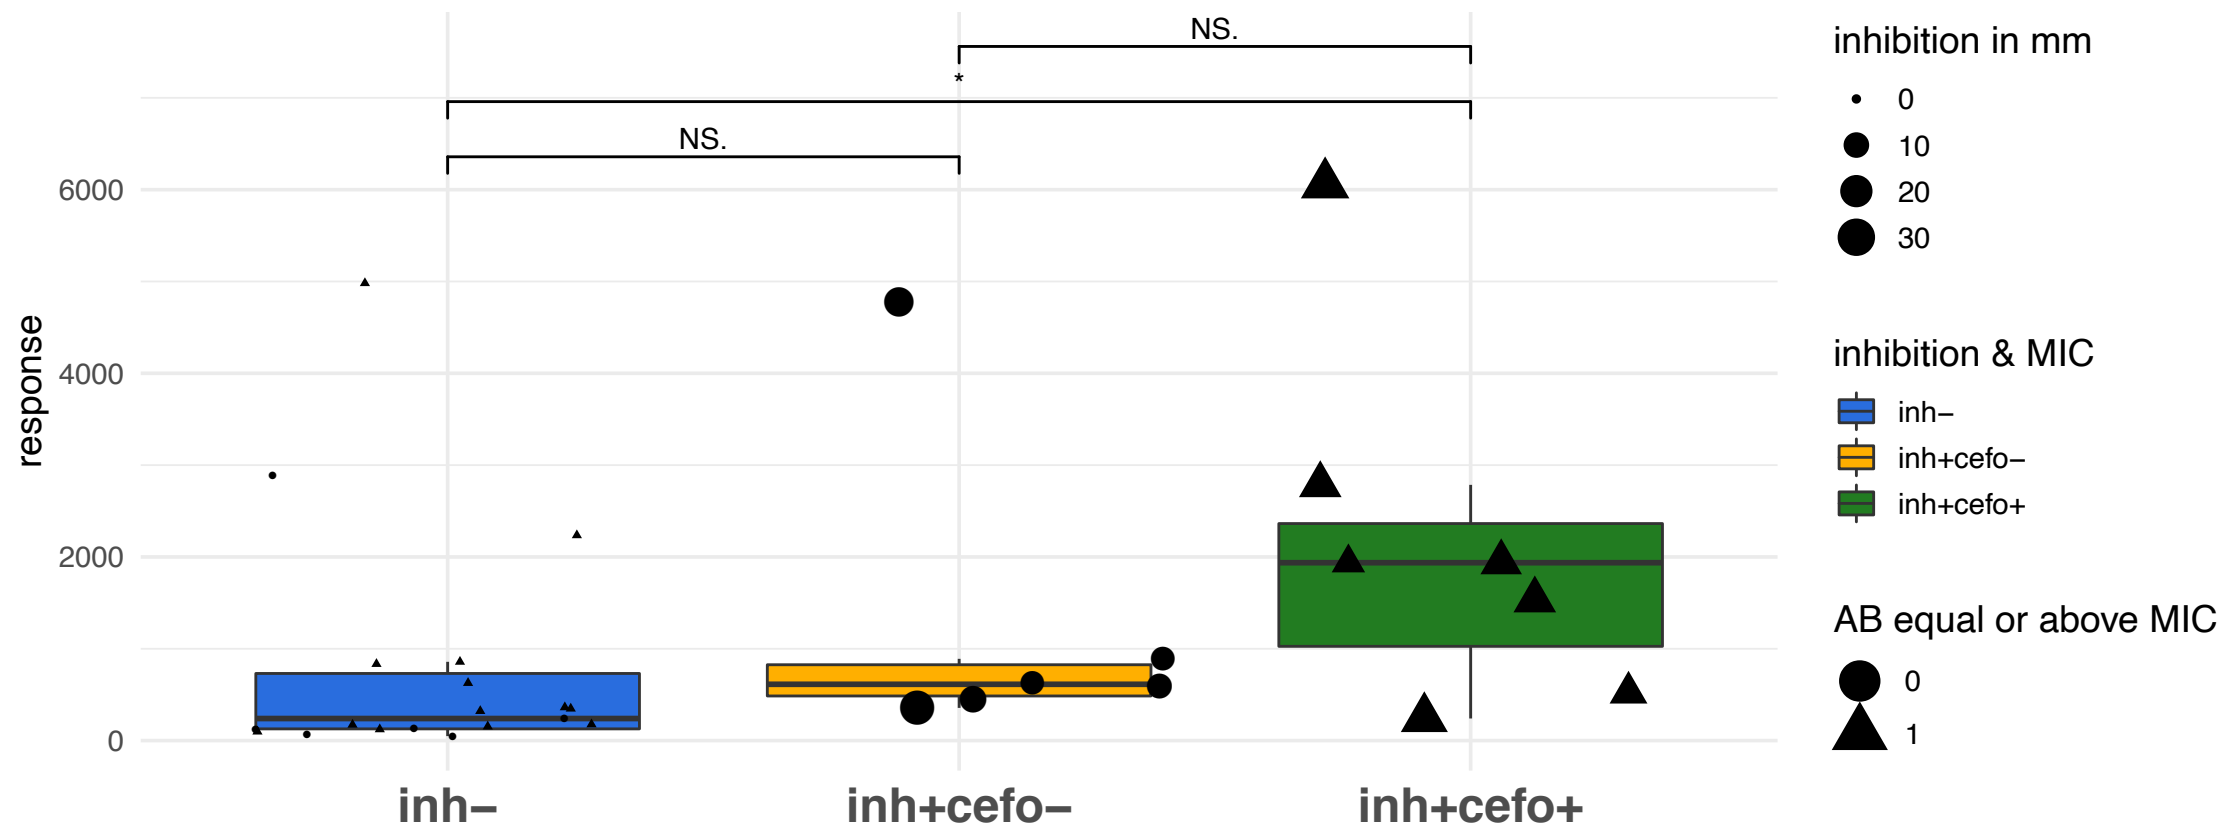

NS &gt;0.05, \* &lt;0.05, \*\* &lt;0.01, \*\*\* &lt;0.001

B

**EtrX1**y-axis = log<sub>10</sub>-scale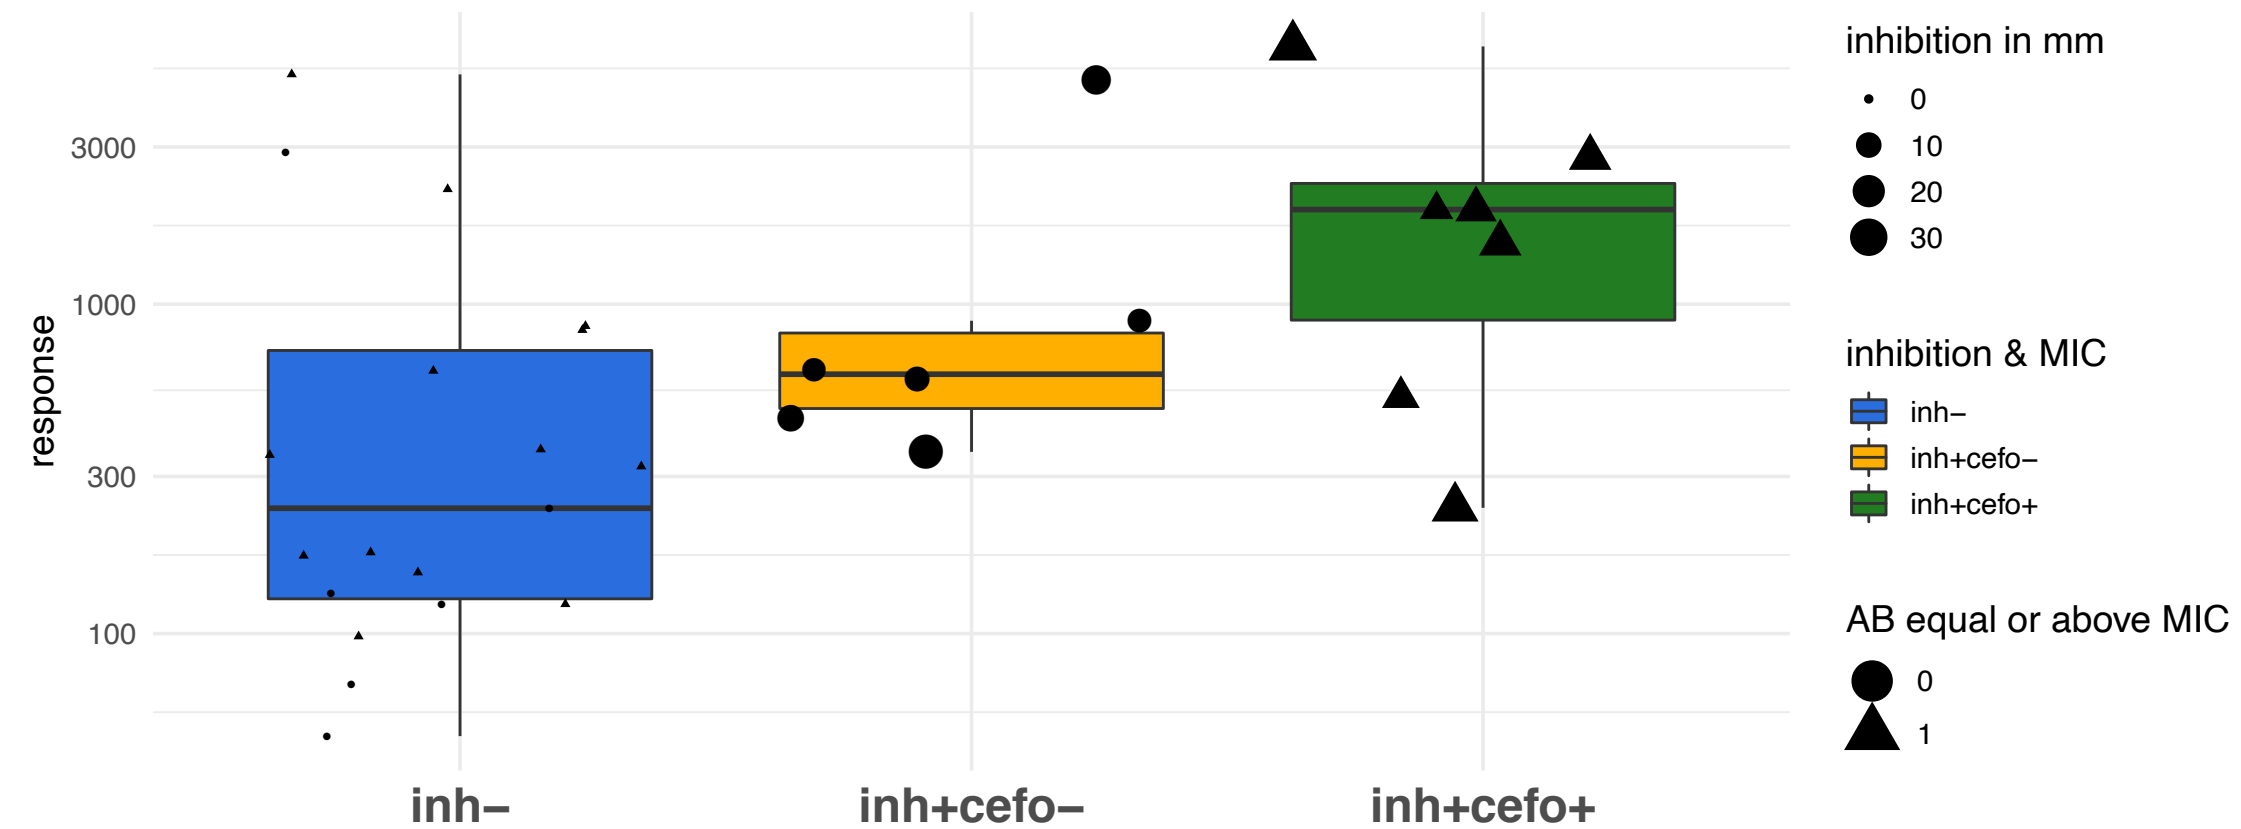

A

## EtrX2

unpaired wilcoxon test

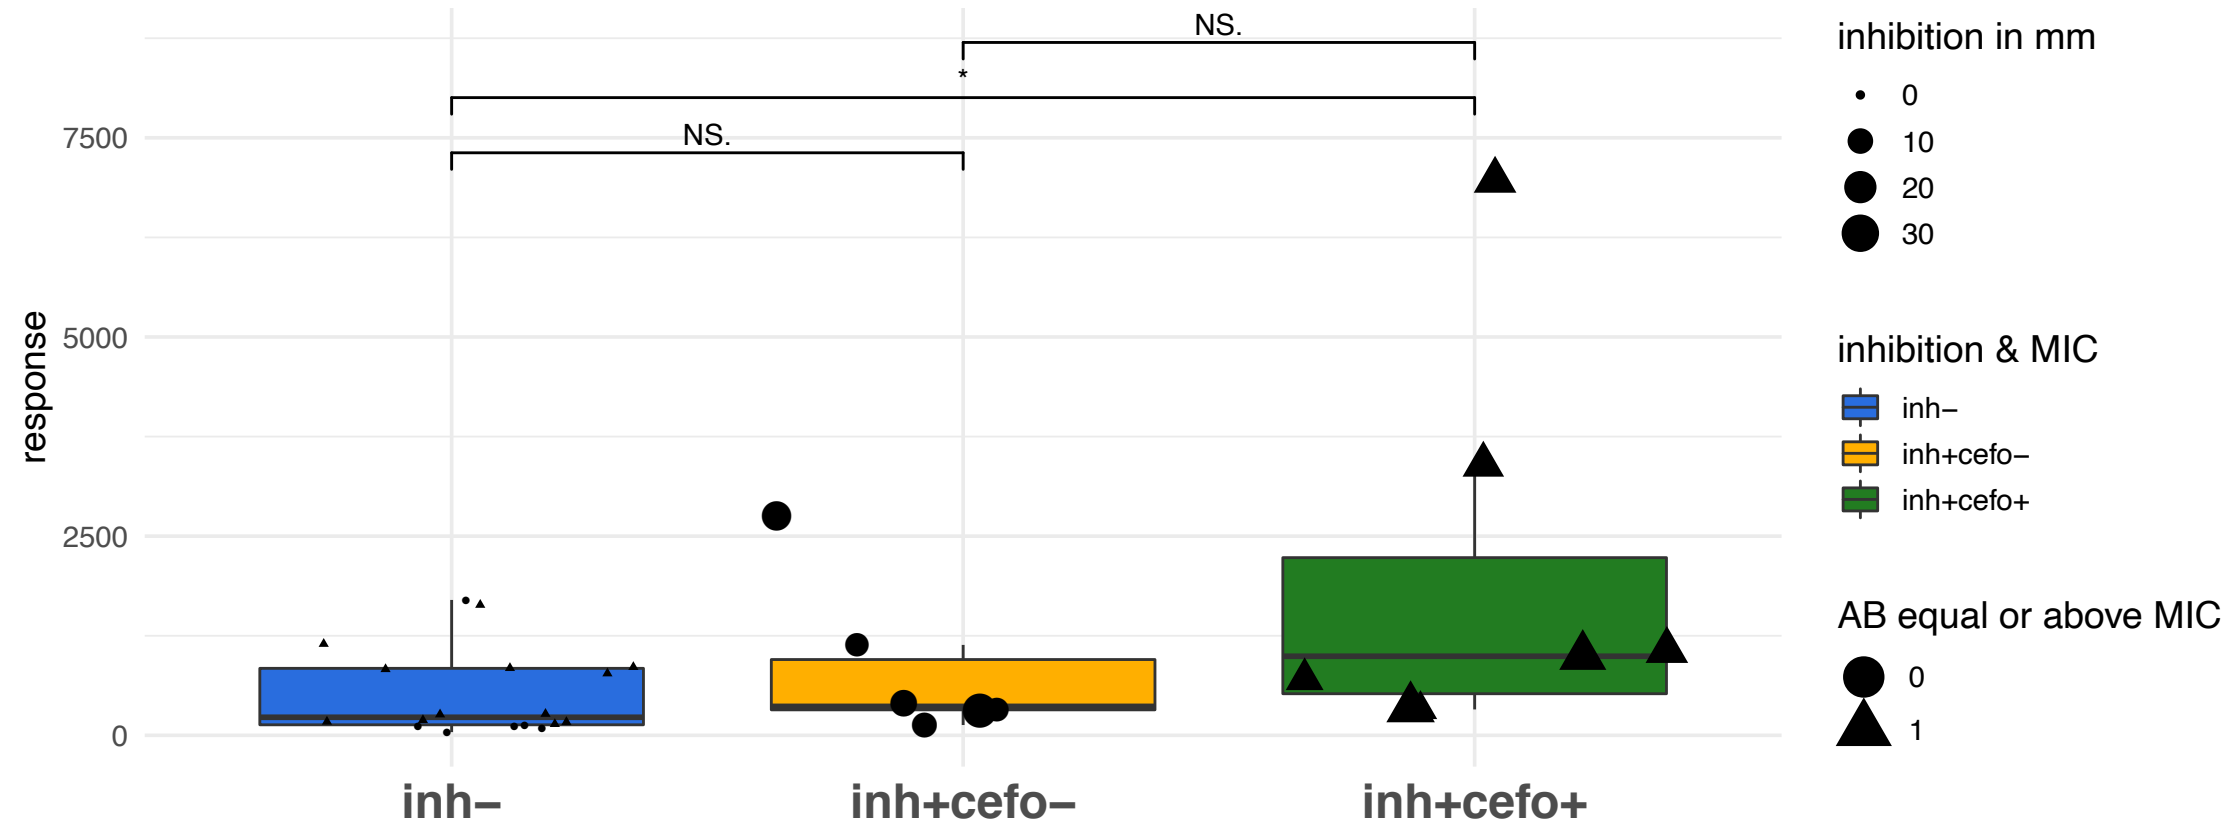

NS &gt;0.05, \* &lt;0.05, \*\* &lt; 0.01, \*\*\* &lt;0.001

B

## EtrX2

y-axis = log<sub>10</sub>-scale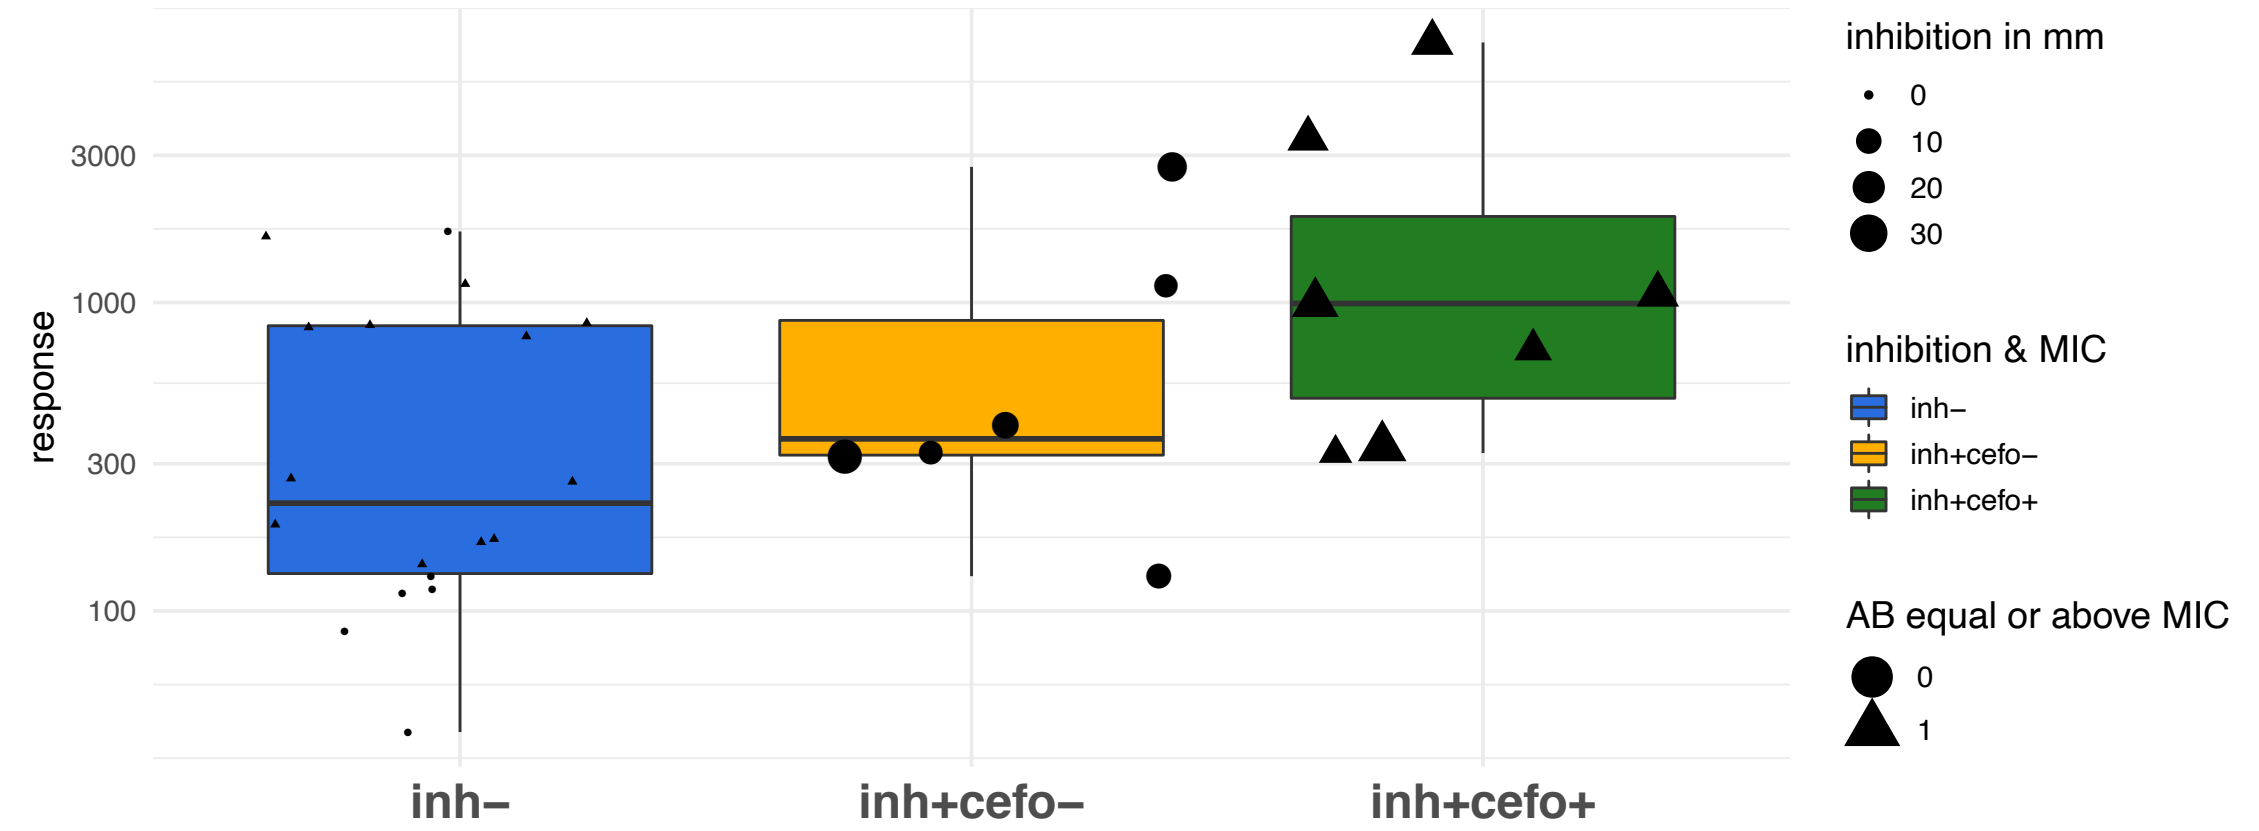



A

## GpsB

unpaired wilcoxon test

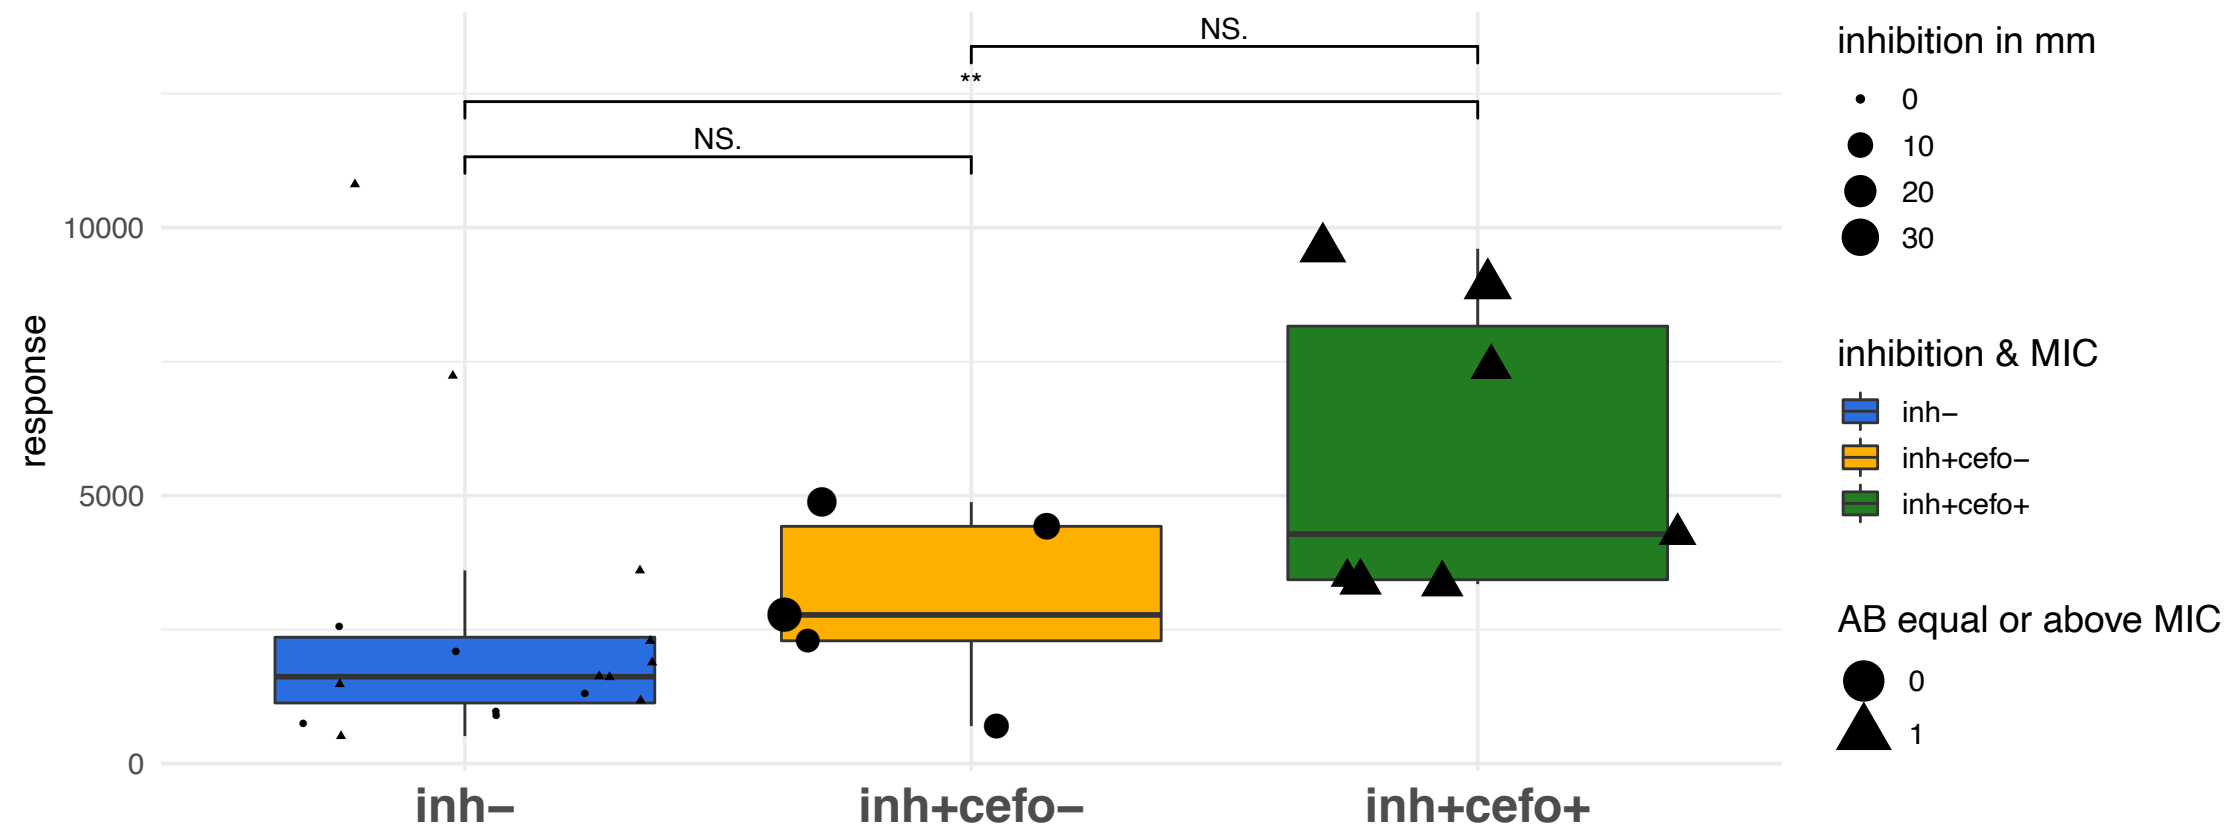

NS &gt;0.05, \* &lt;0.05, \*\* &lt;0.01, \*\*\* &lt;0.001

B

## GpsB

y-axis = log<sub>10</sub>-scale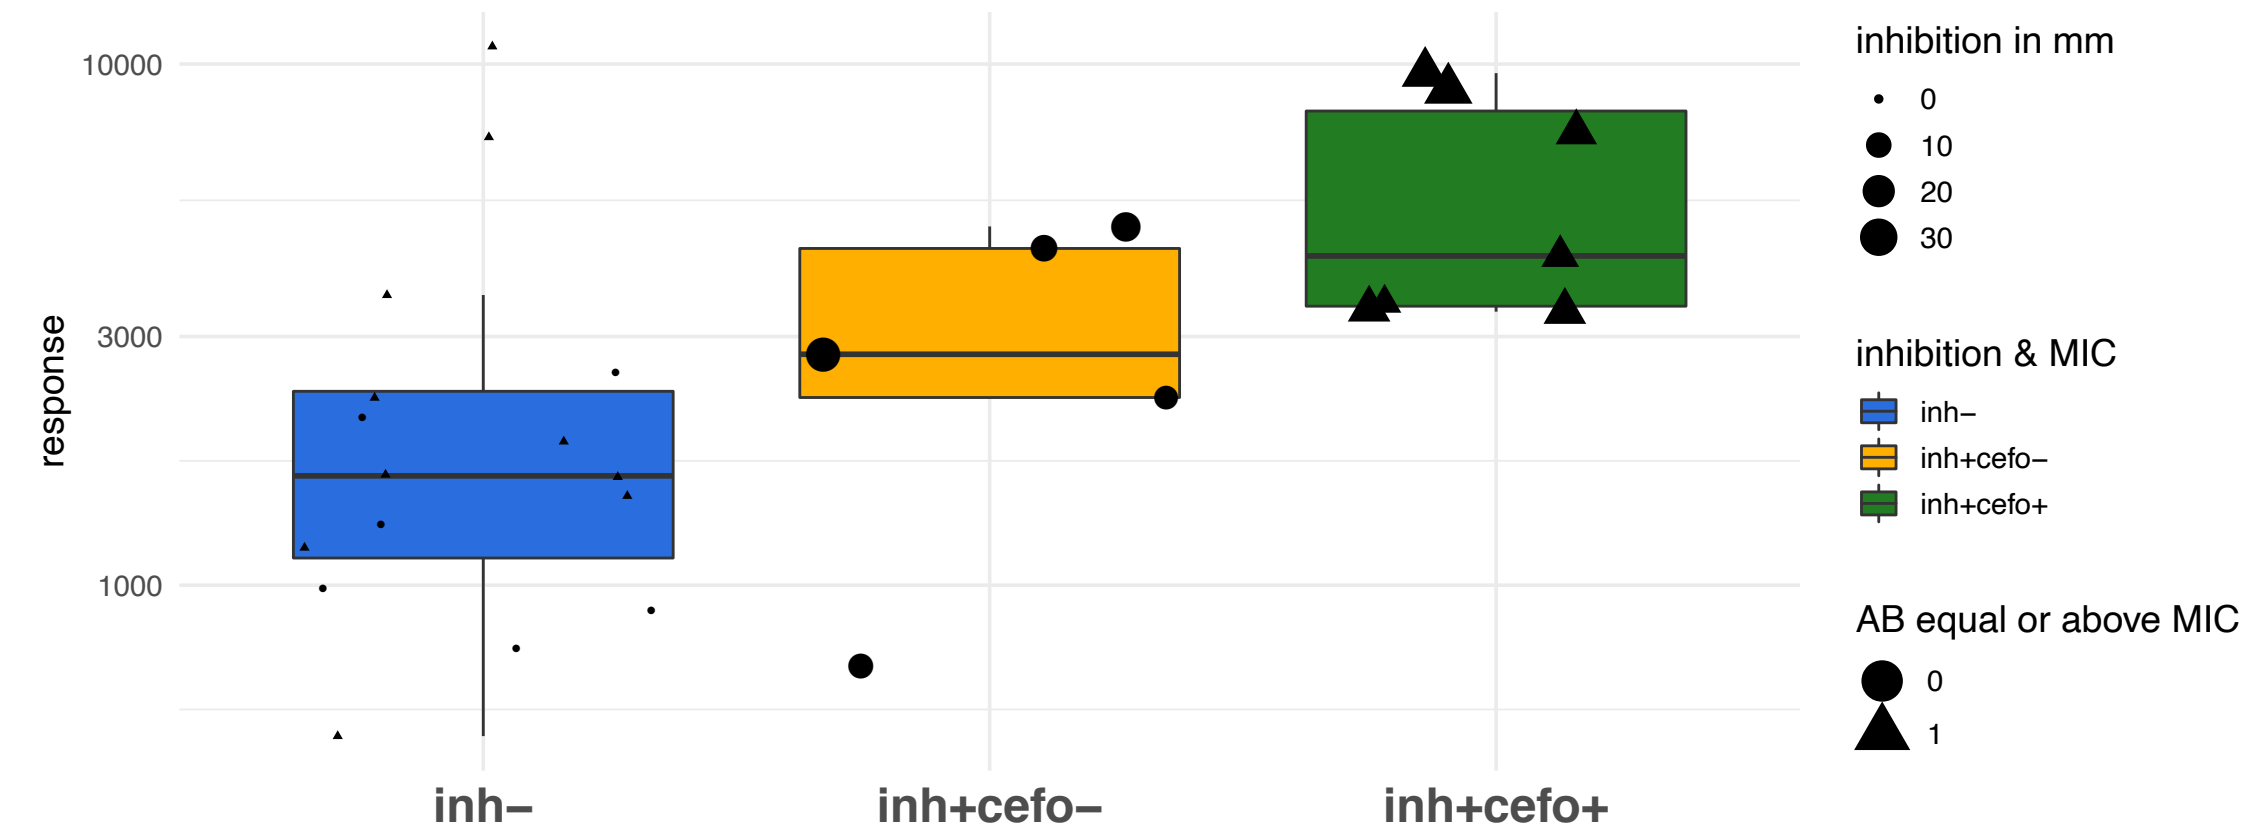

A

## Hic2

unpaired wilcoxon test

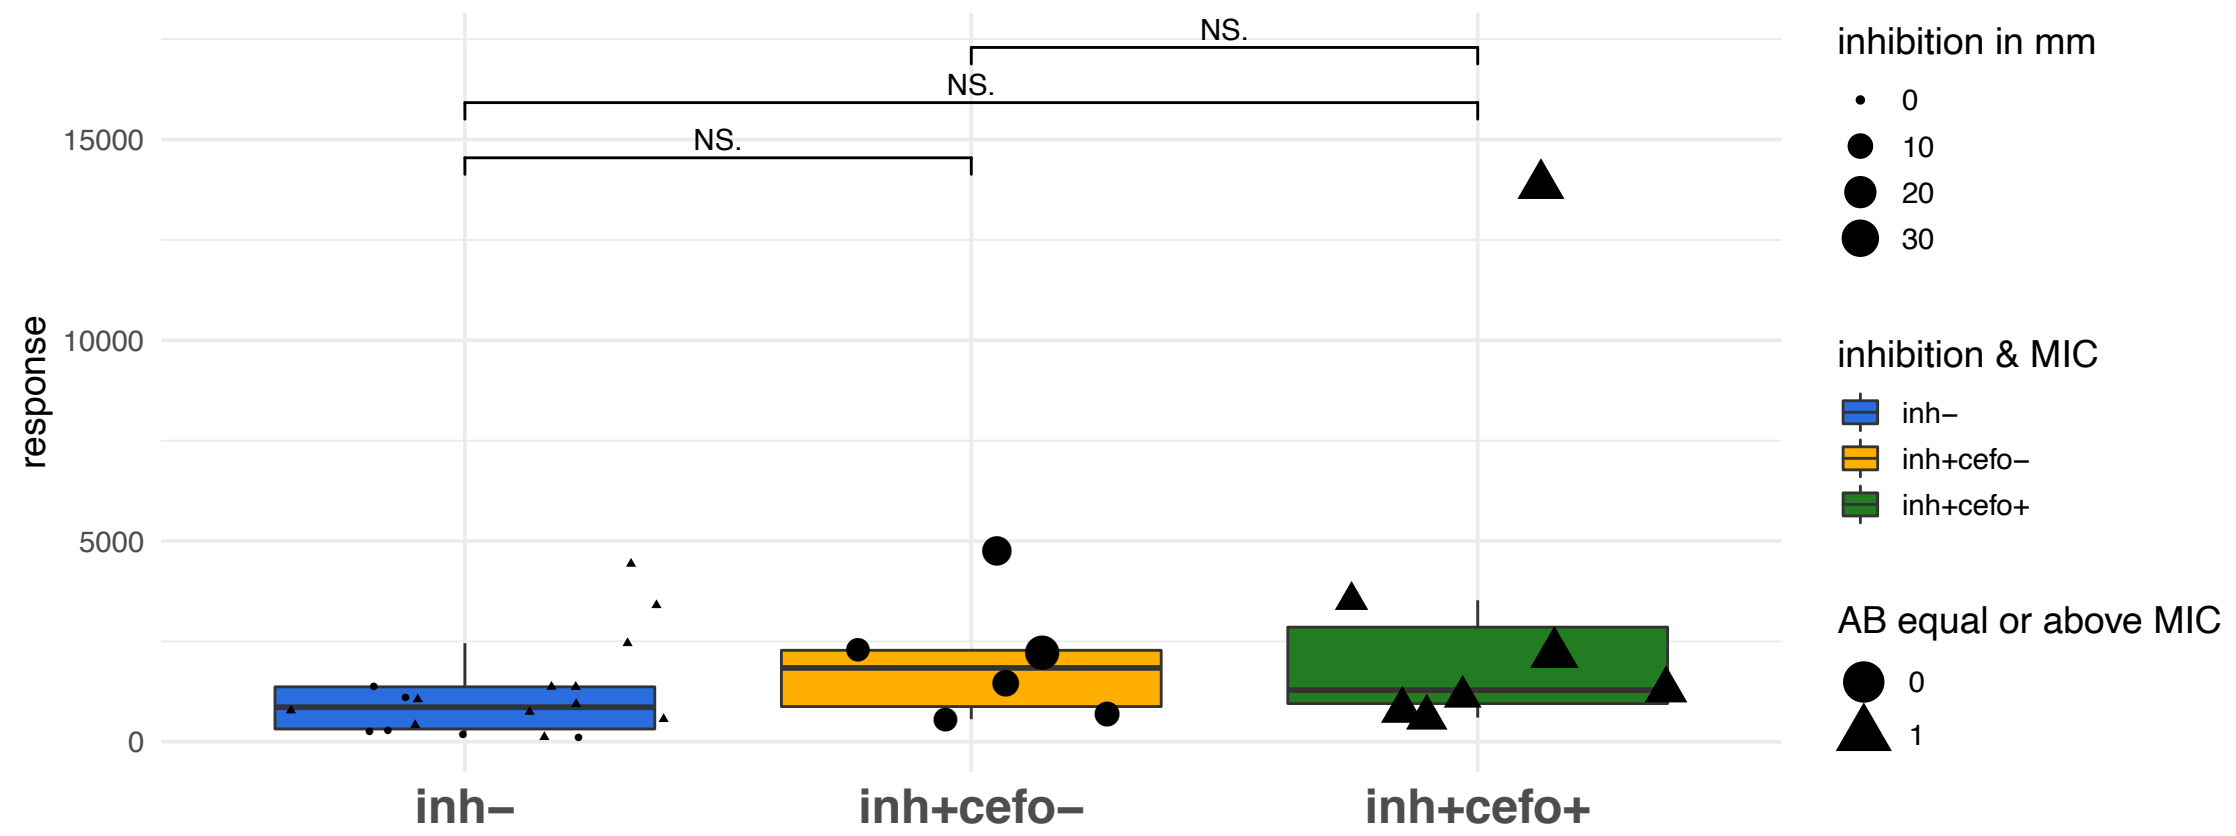

NS &gt;0.05, \* &lt;0.05, \*\* &lt;0.01, \*\*\* &lt;0.001

B

## Hic2

y-axis = log<sub>10</sub>-scale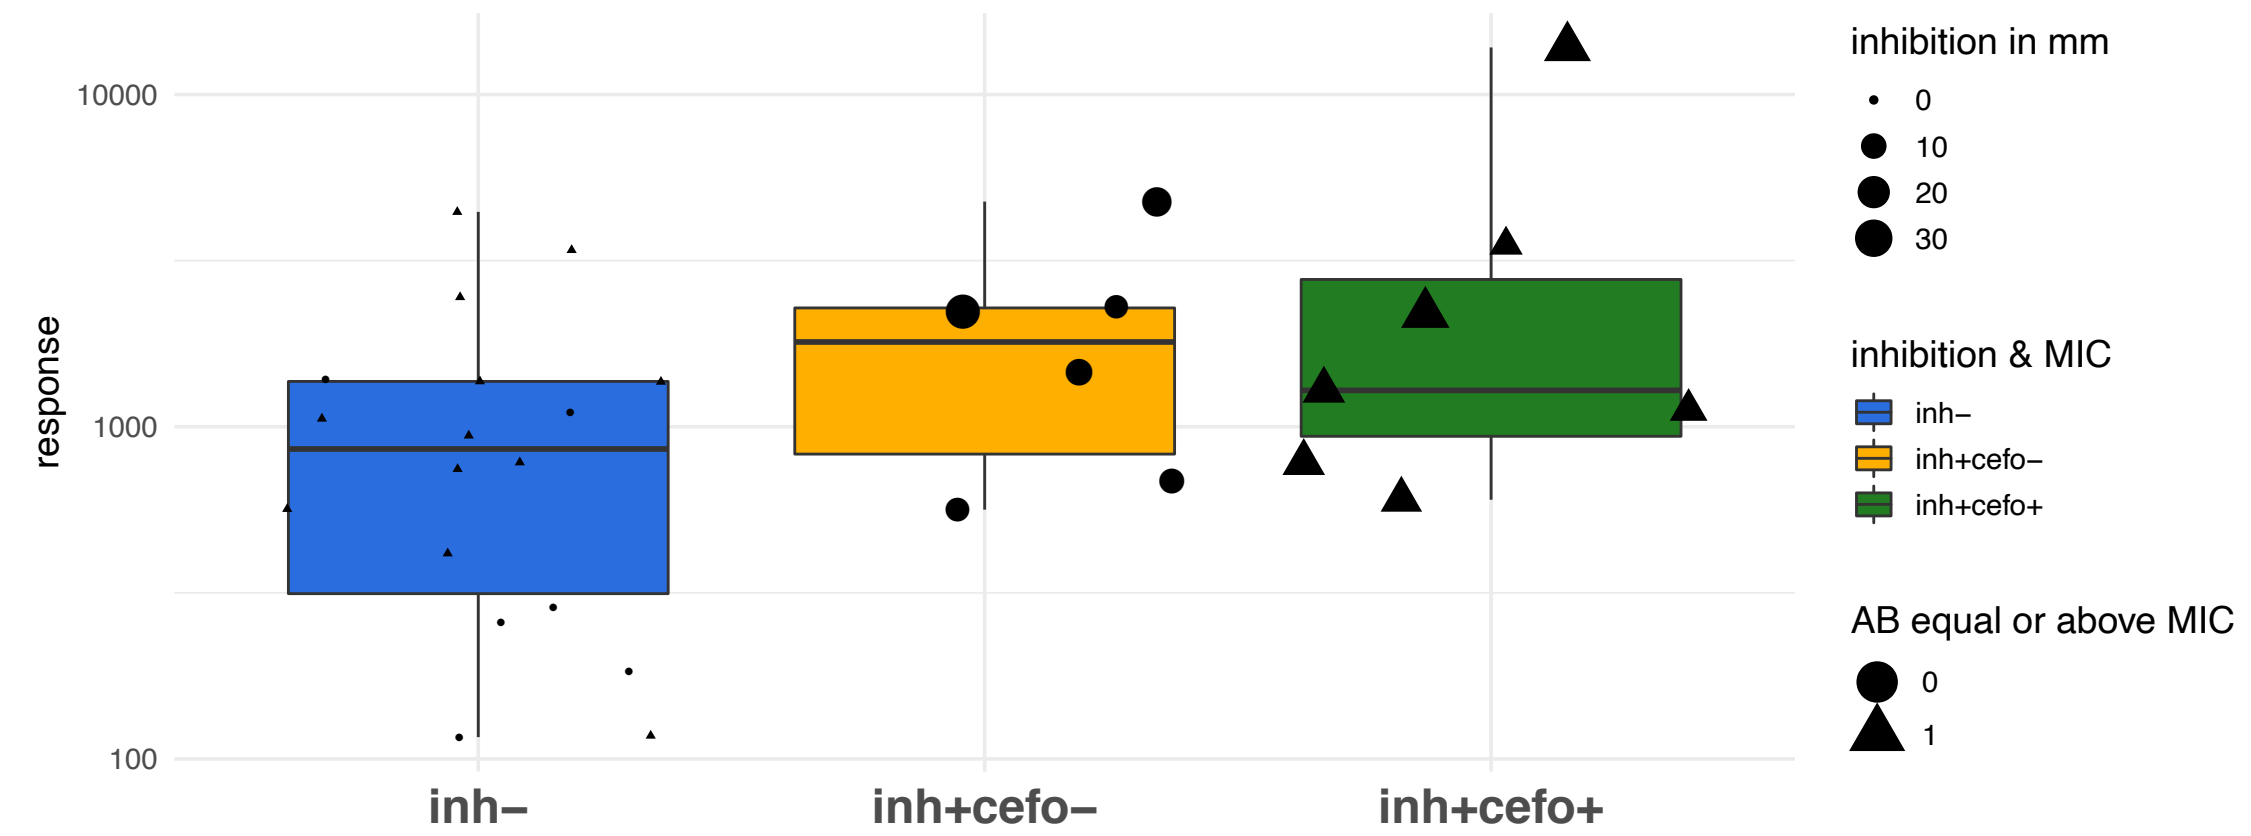

A

## LytA

unpaired wilcoxon test

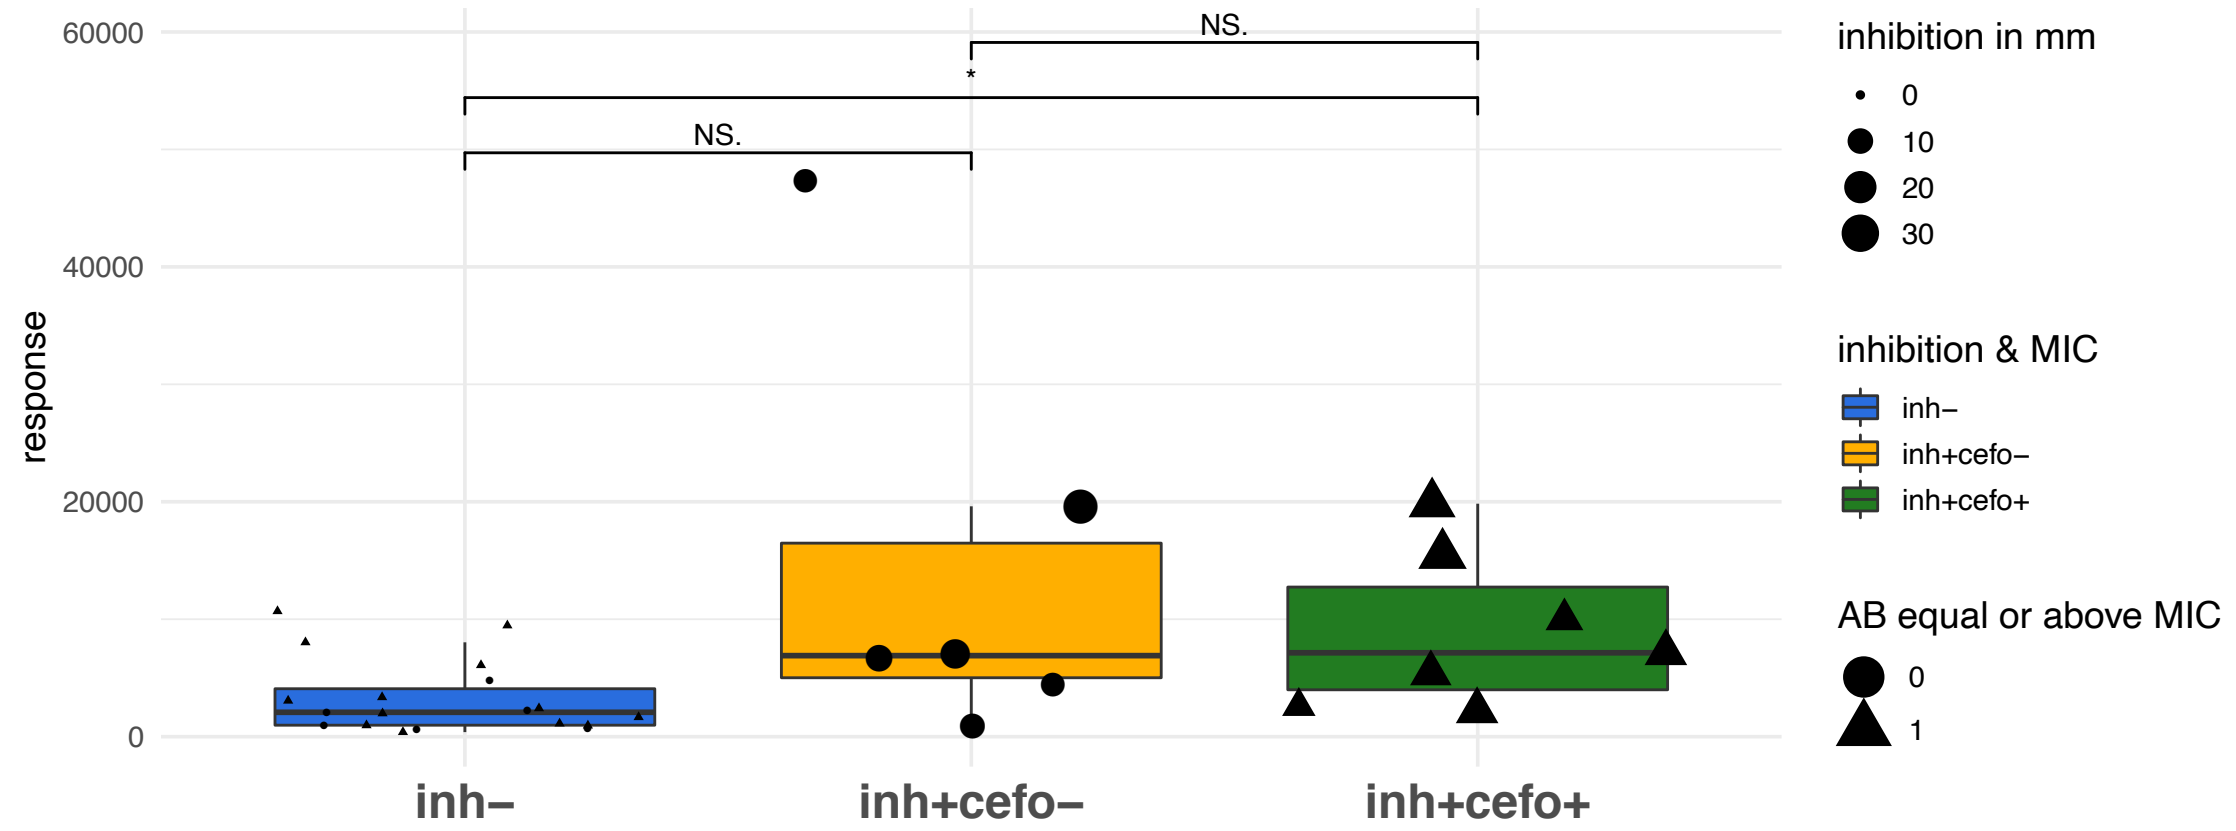

NS &gt;0.05, \* &lt;0.05, \*\* &lt;0.01, \*\*\* &lt;0.001

B

## LytA

y-axis = log10-scale

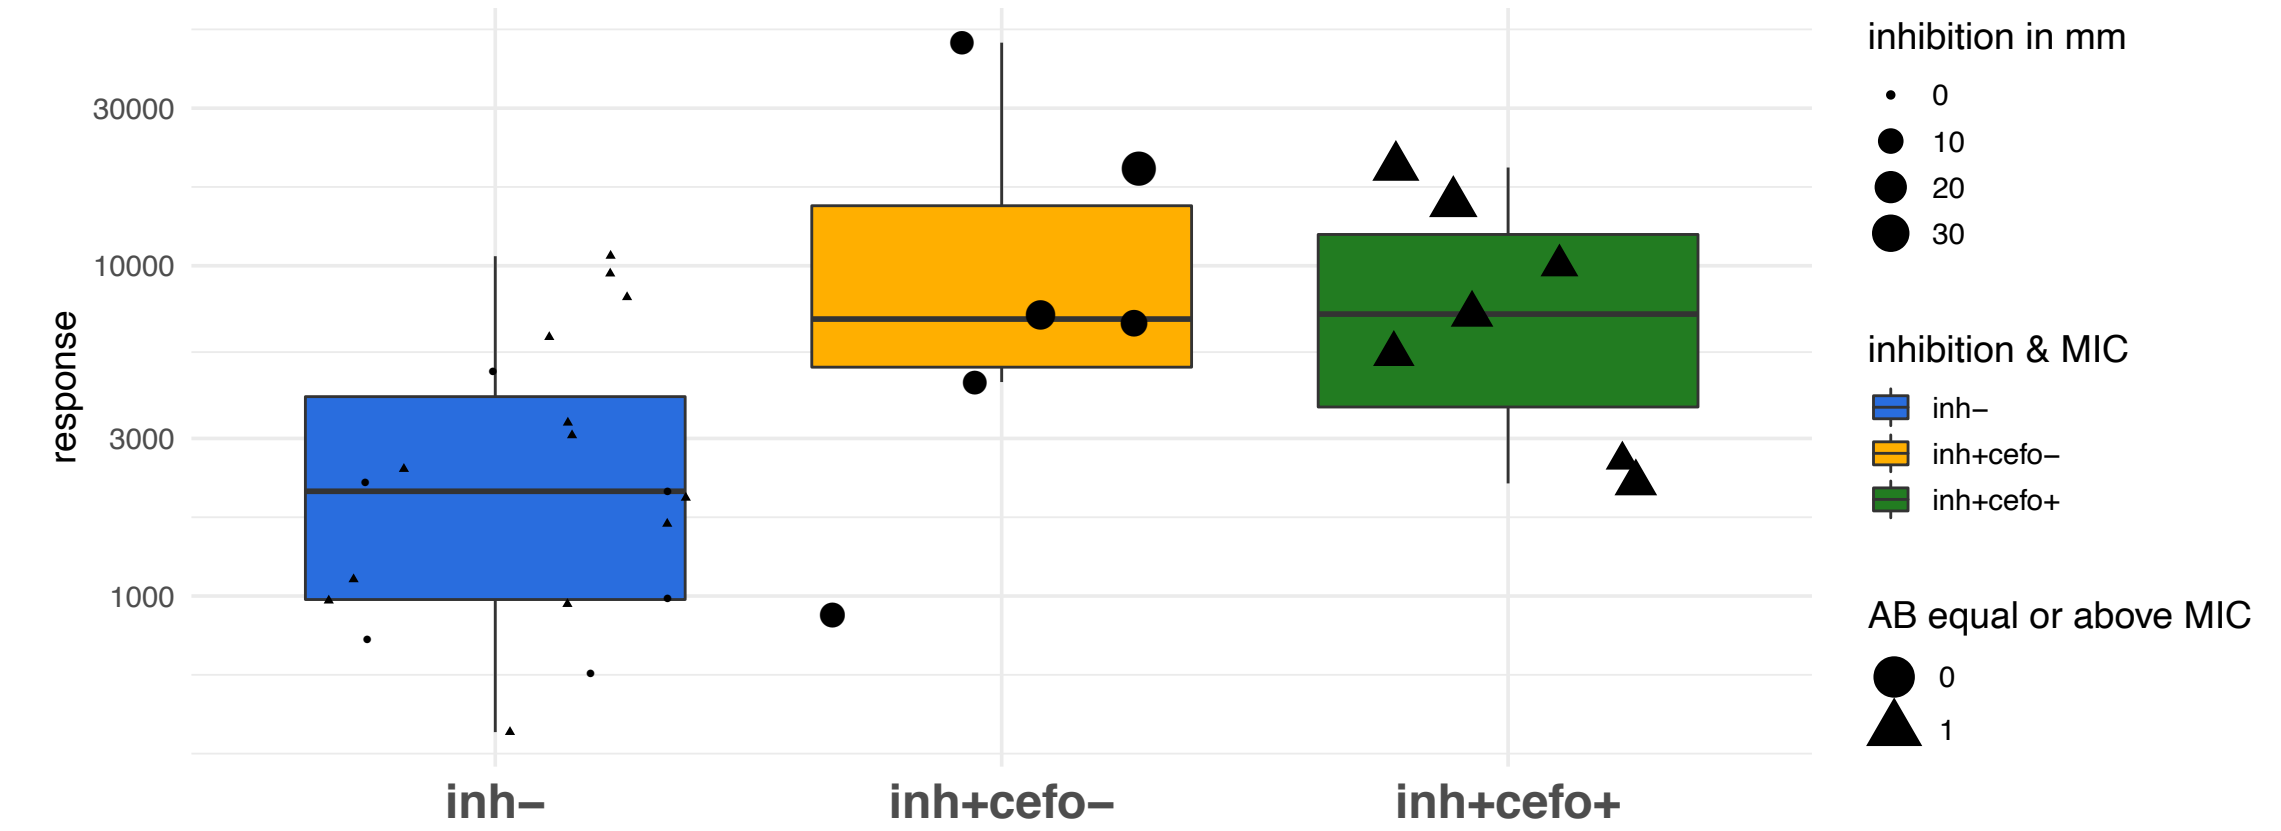

A

## LytB

unpaired wilcoxon test

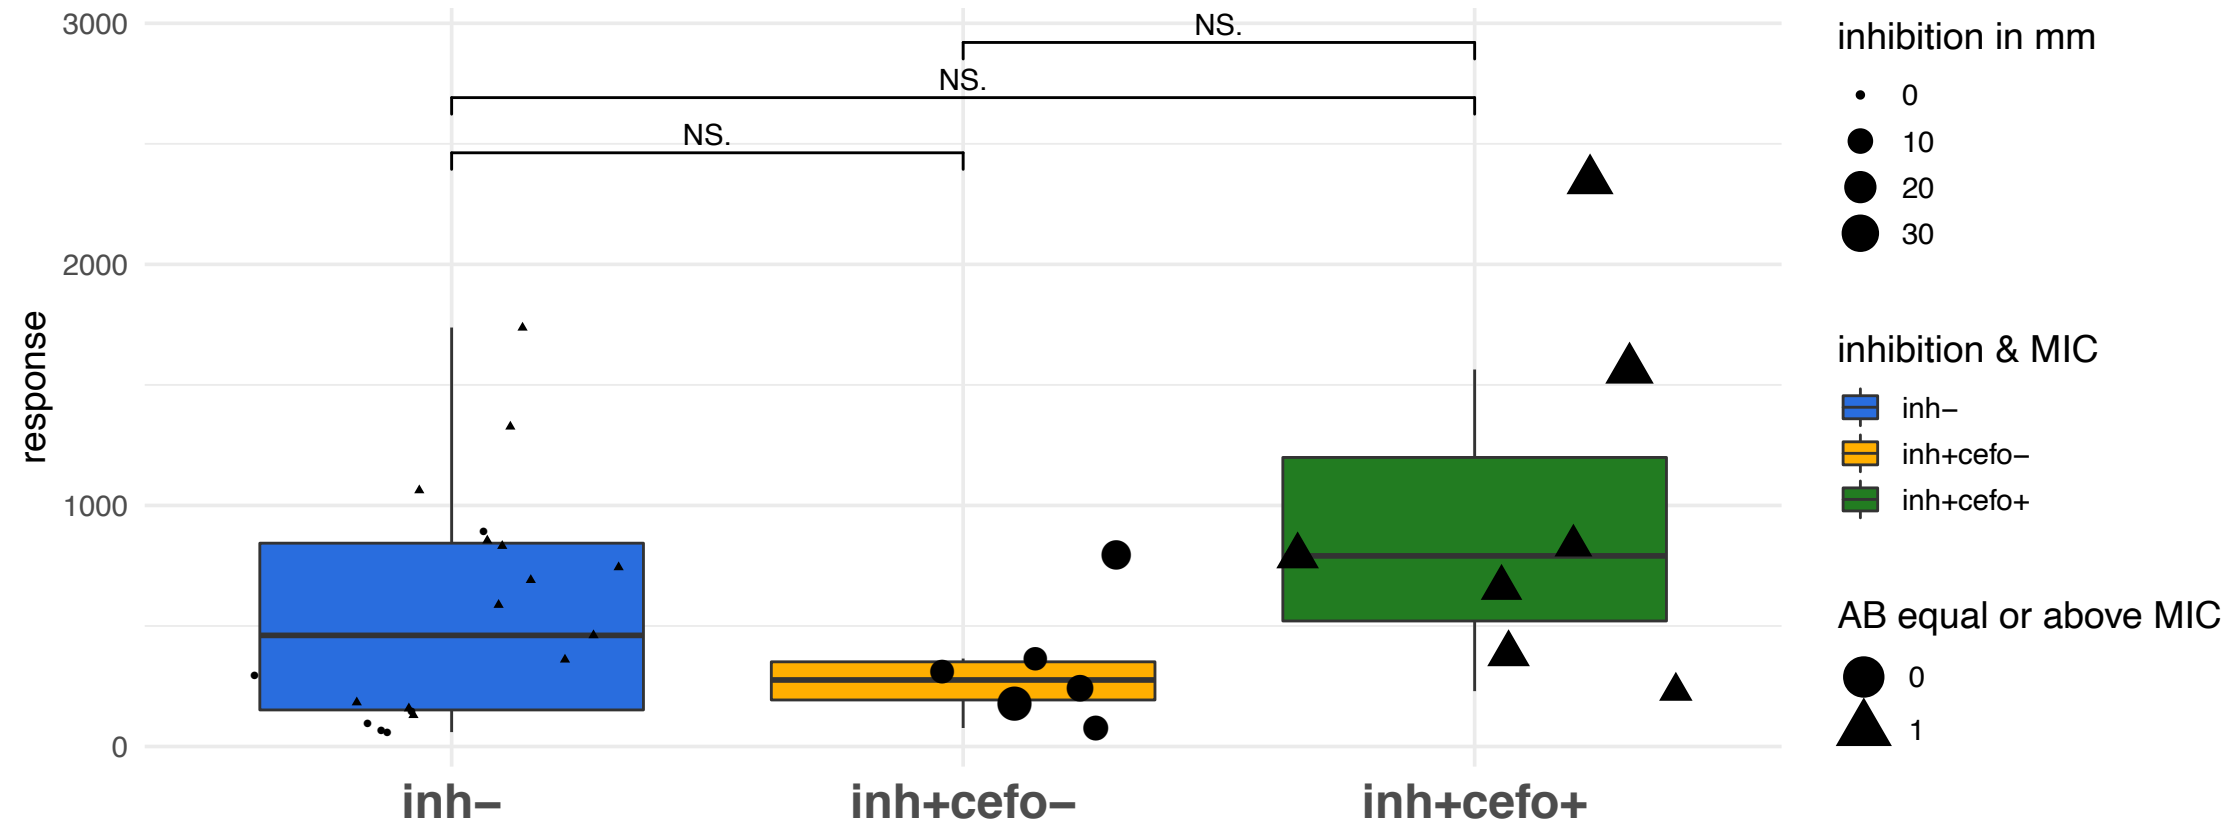

NS &gt;0.05, \* &lt;0.05, \*\* &lt;0.01, \*\*\* &lt;0.001

B

## LytB

y-axis = log<sub>10</sub>-scale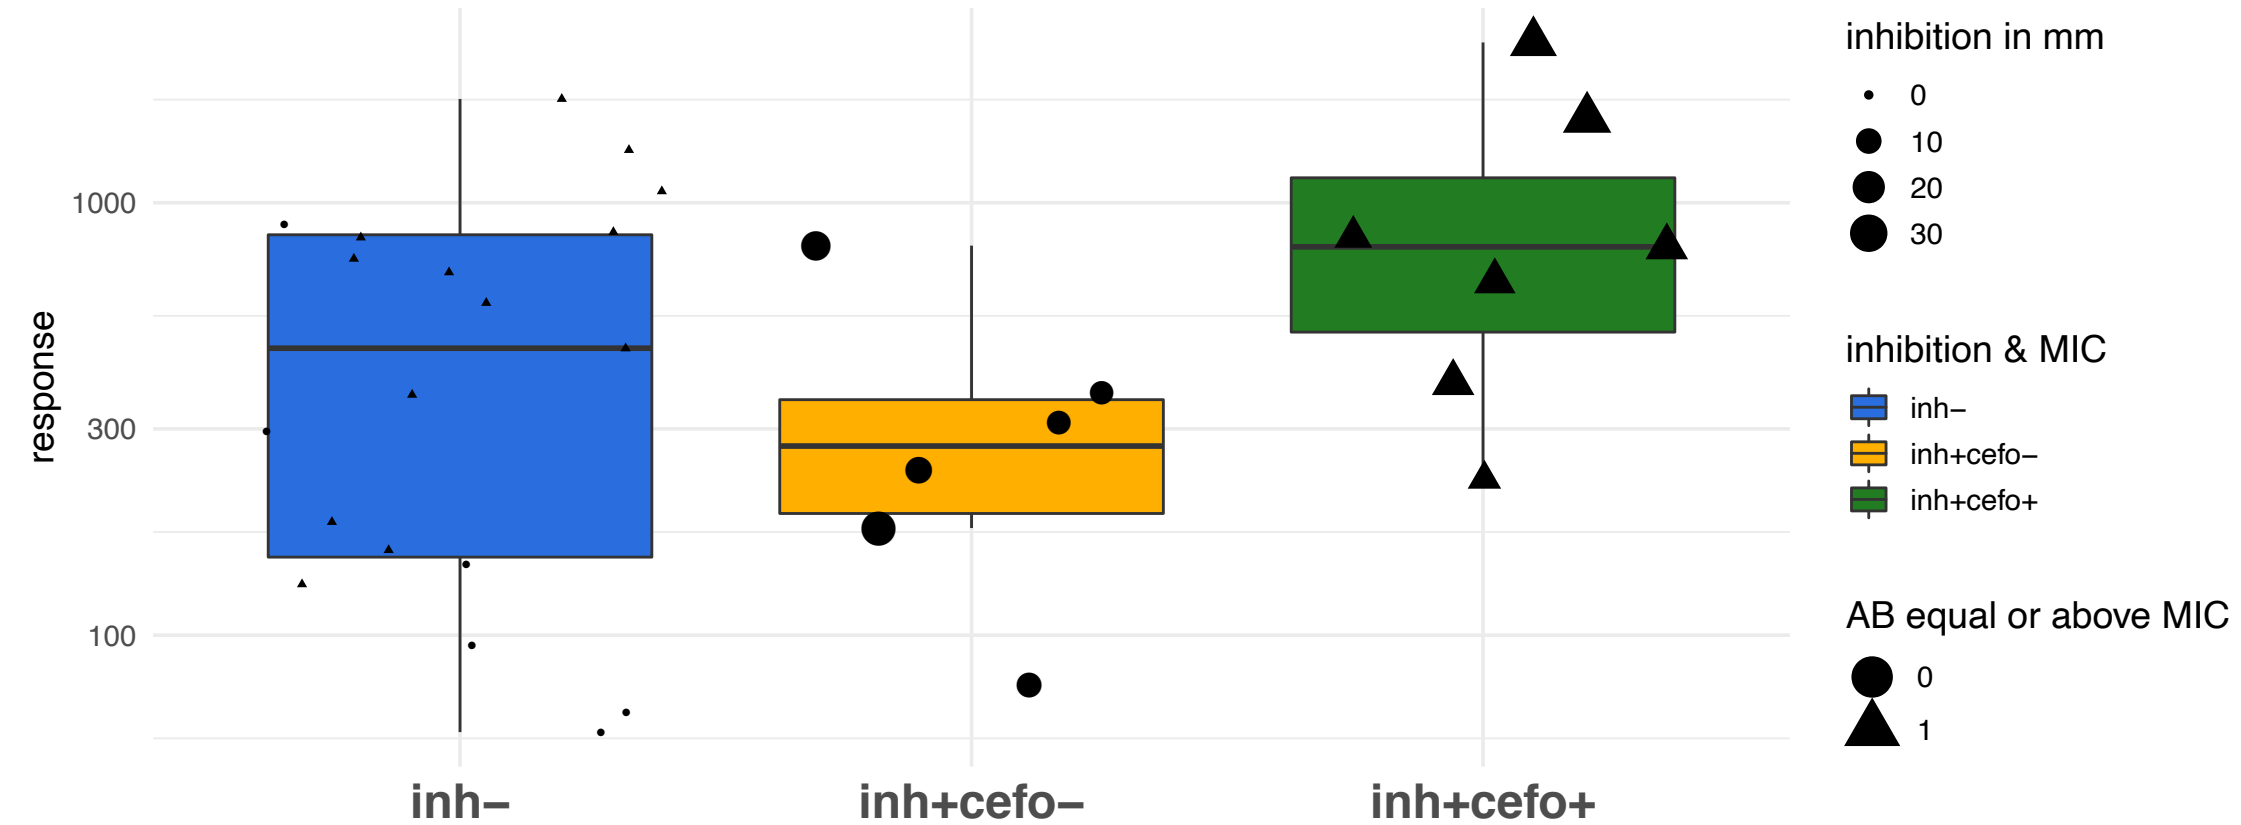

A

## LytC

unpaired wilcoxon test

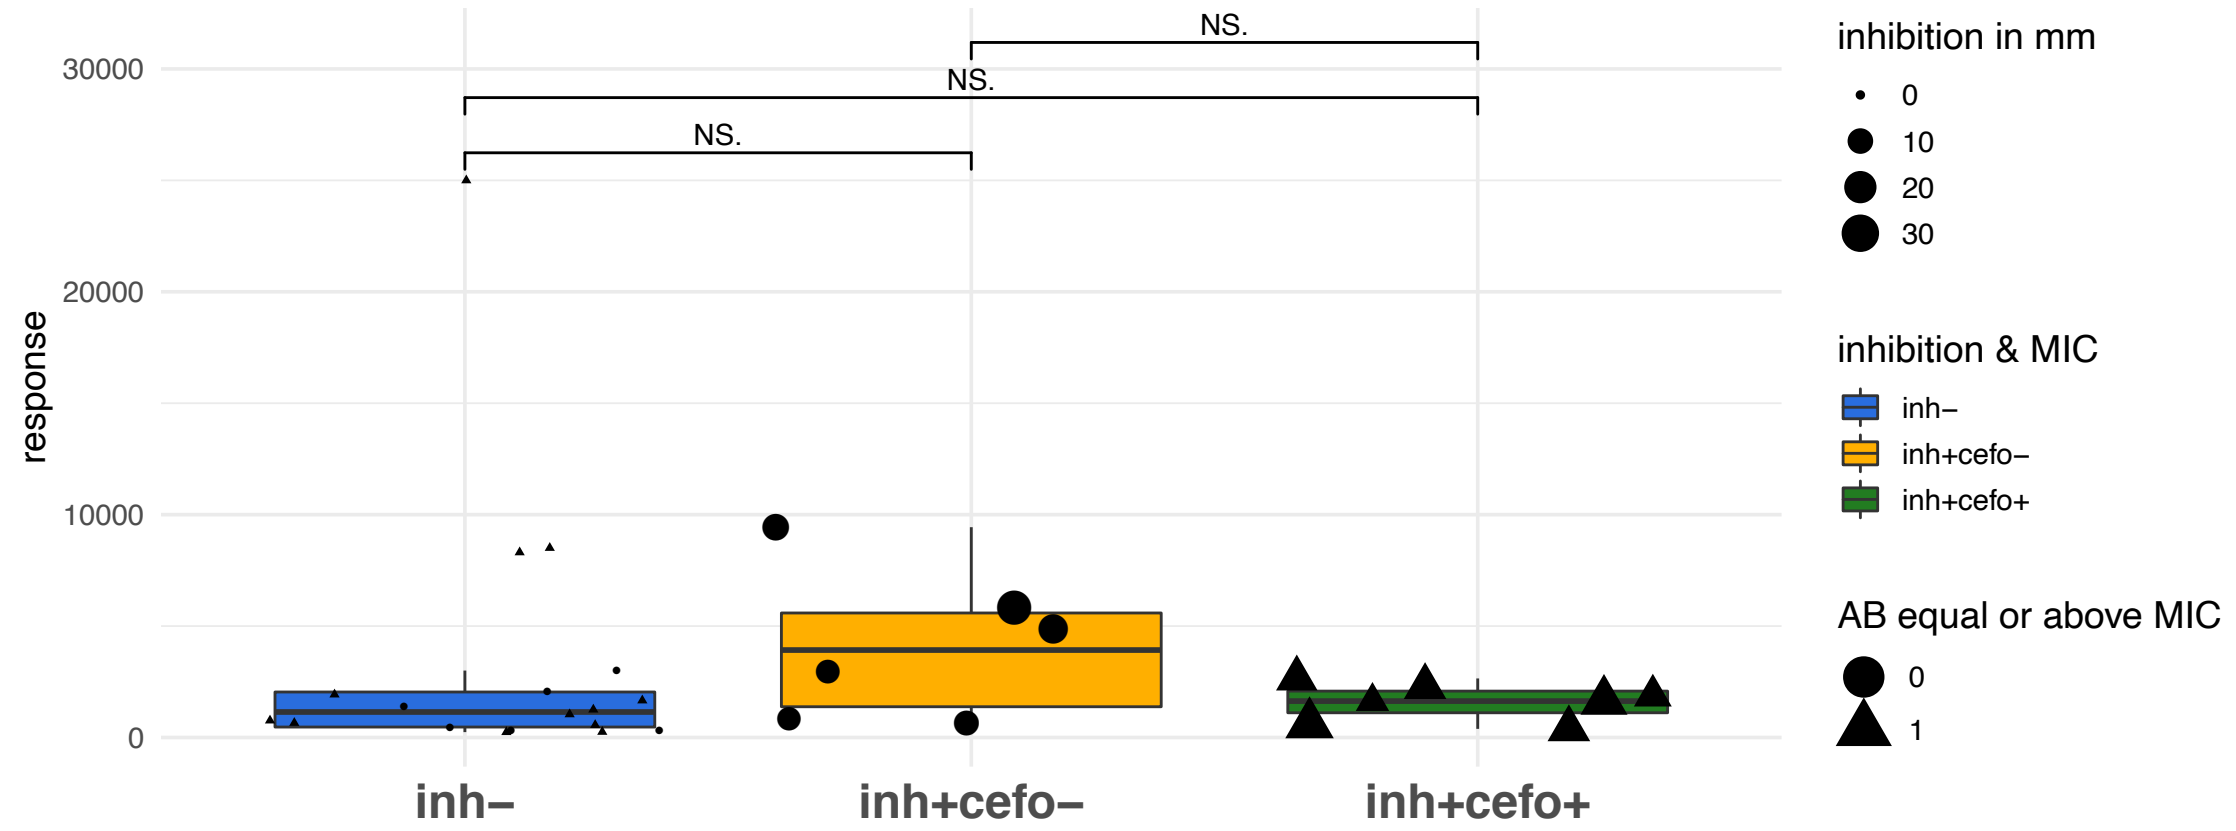

NS &gt;0.05, \* &lt;0.05, \*\* &lt;0.01, \*\*\* &lt;0.001

inhibition in mm

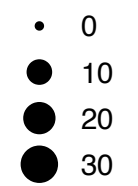

inhibition &amp; MIC

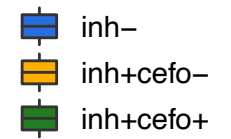

AB equal or above MIC

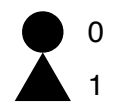

B

## LytC

y-axis = log10-scale

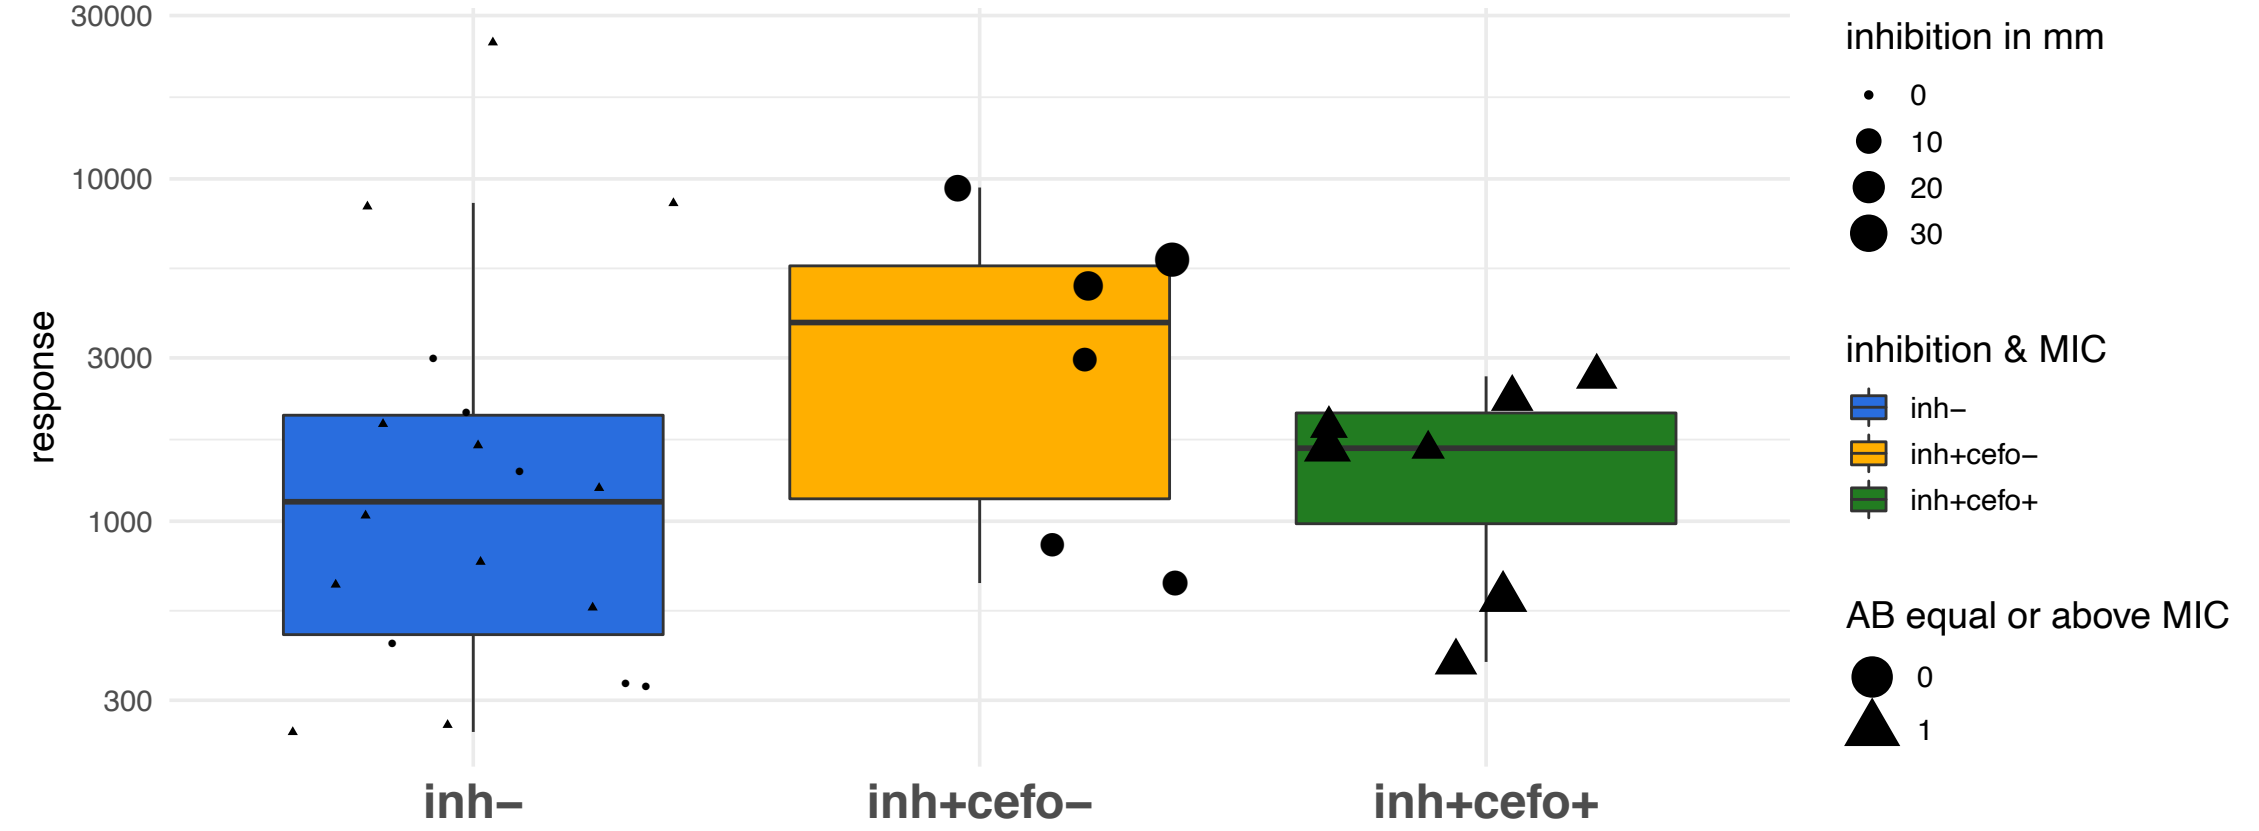

inhibition in mm

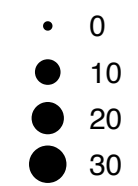

inhibition &amp; MIC

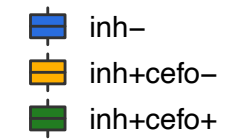

AB equal or above MIC

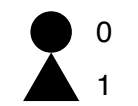

A

## MetQ

unpaired wilcoxon test

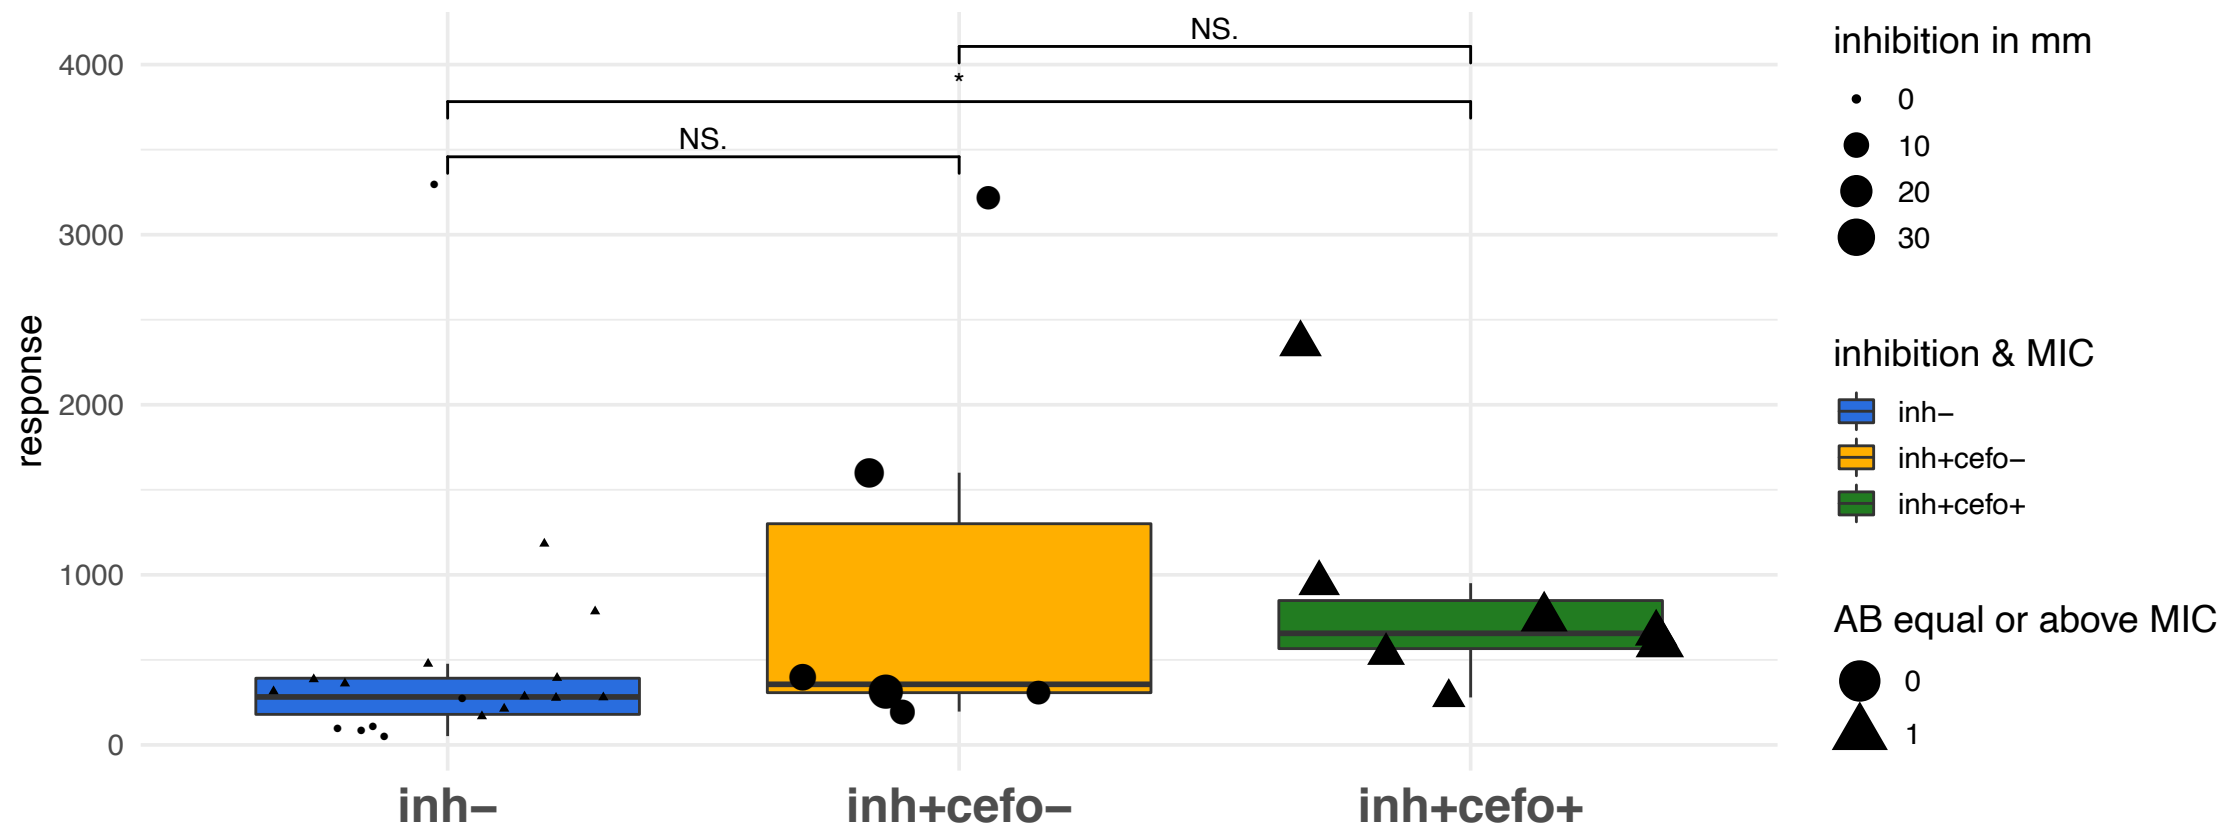

NS &gt;0.05, \* &lt;0.05, \*\* &lt; 0.01, \*\*\* &lt;0.001

B

## MetQ

y-axis = log<sub>10</sub>-scale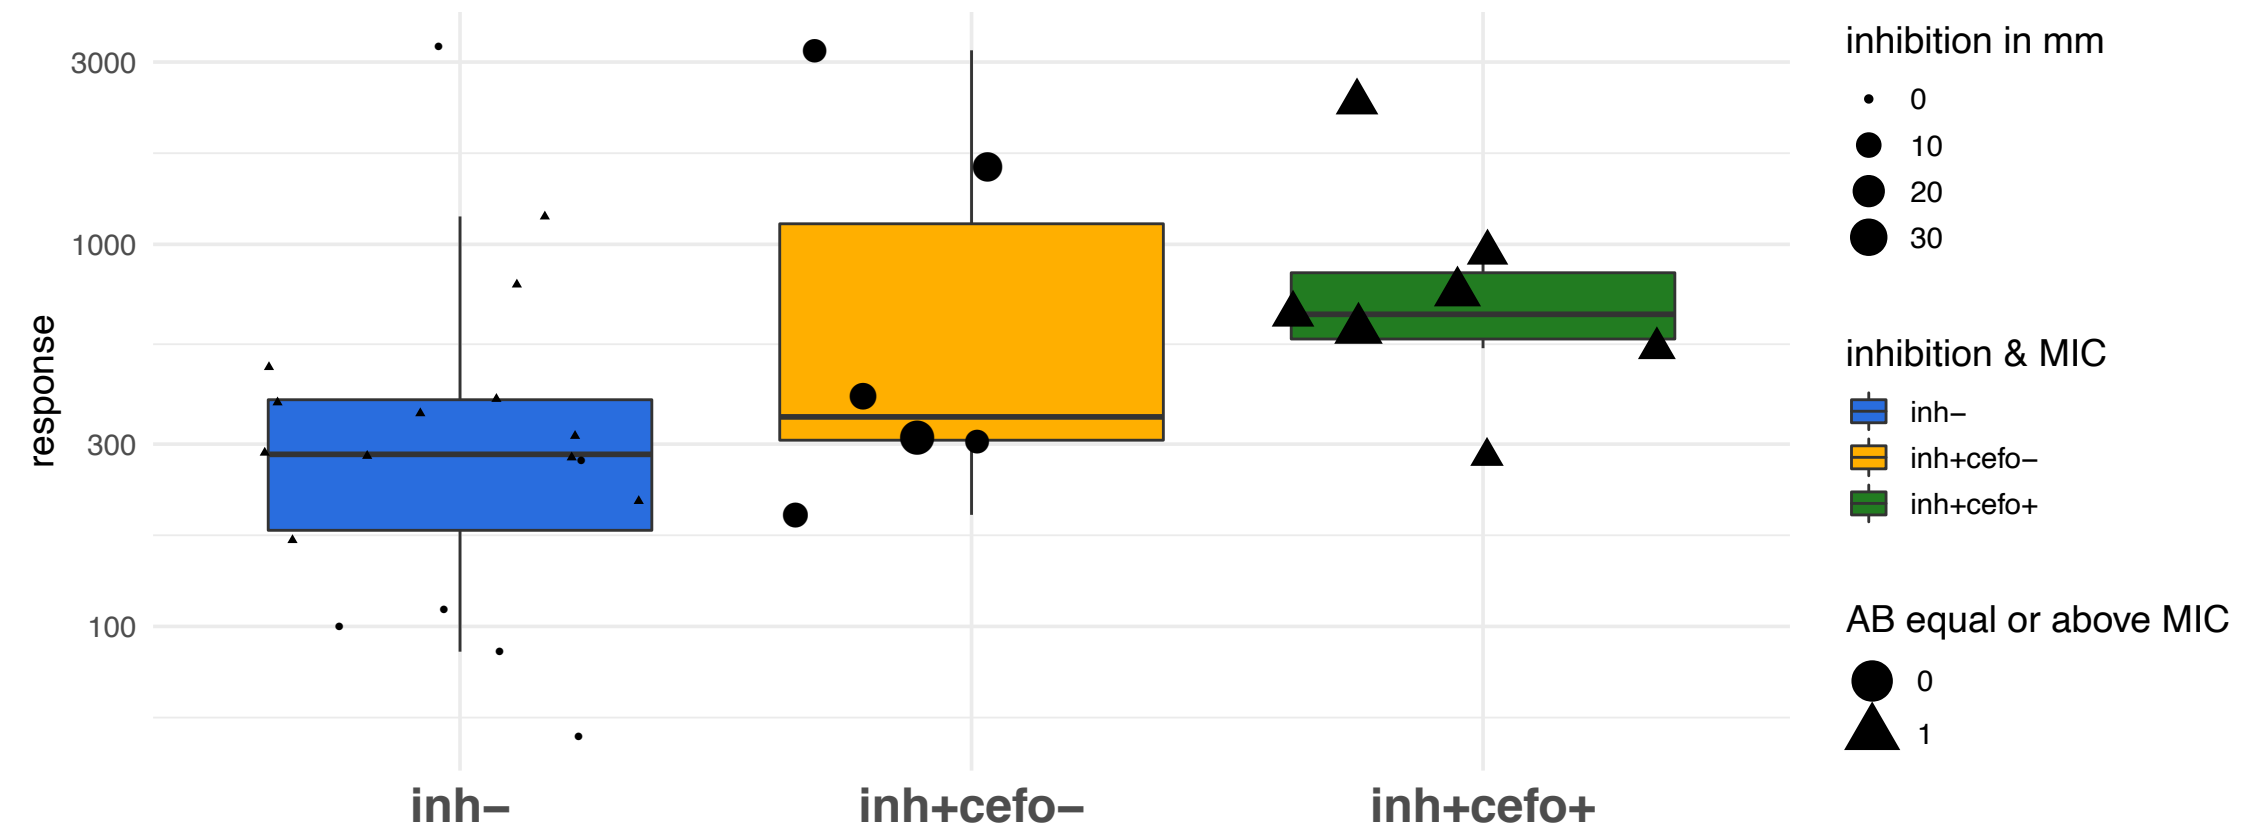

A

# MsrAB2

unpaired wilcoxon test

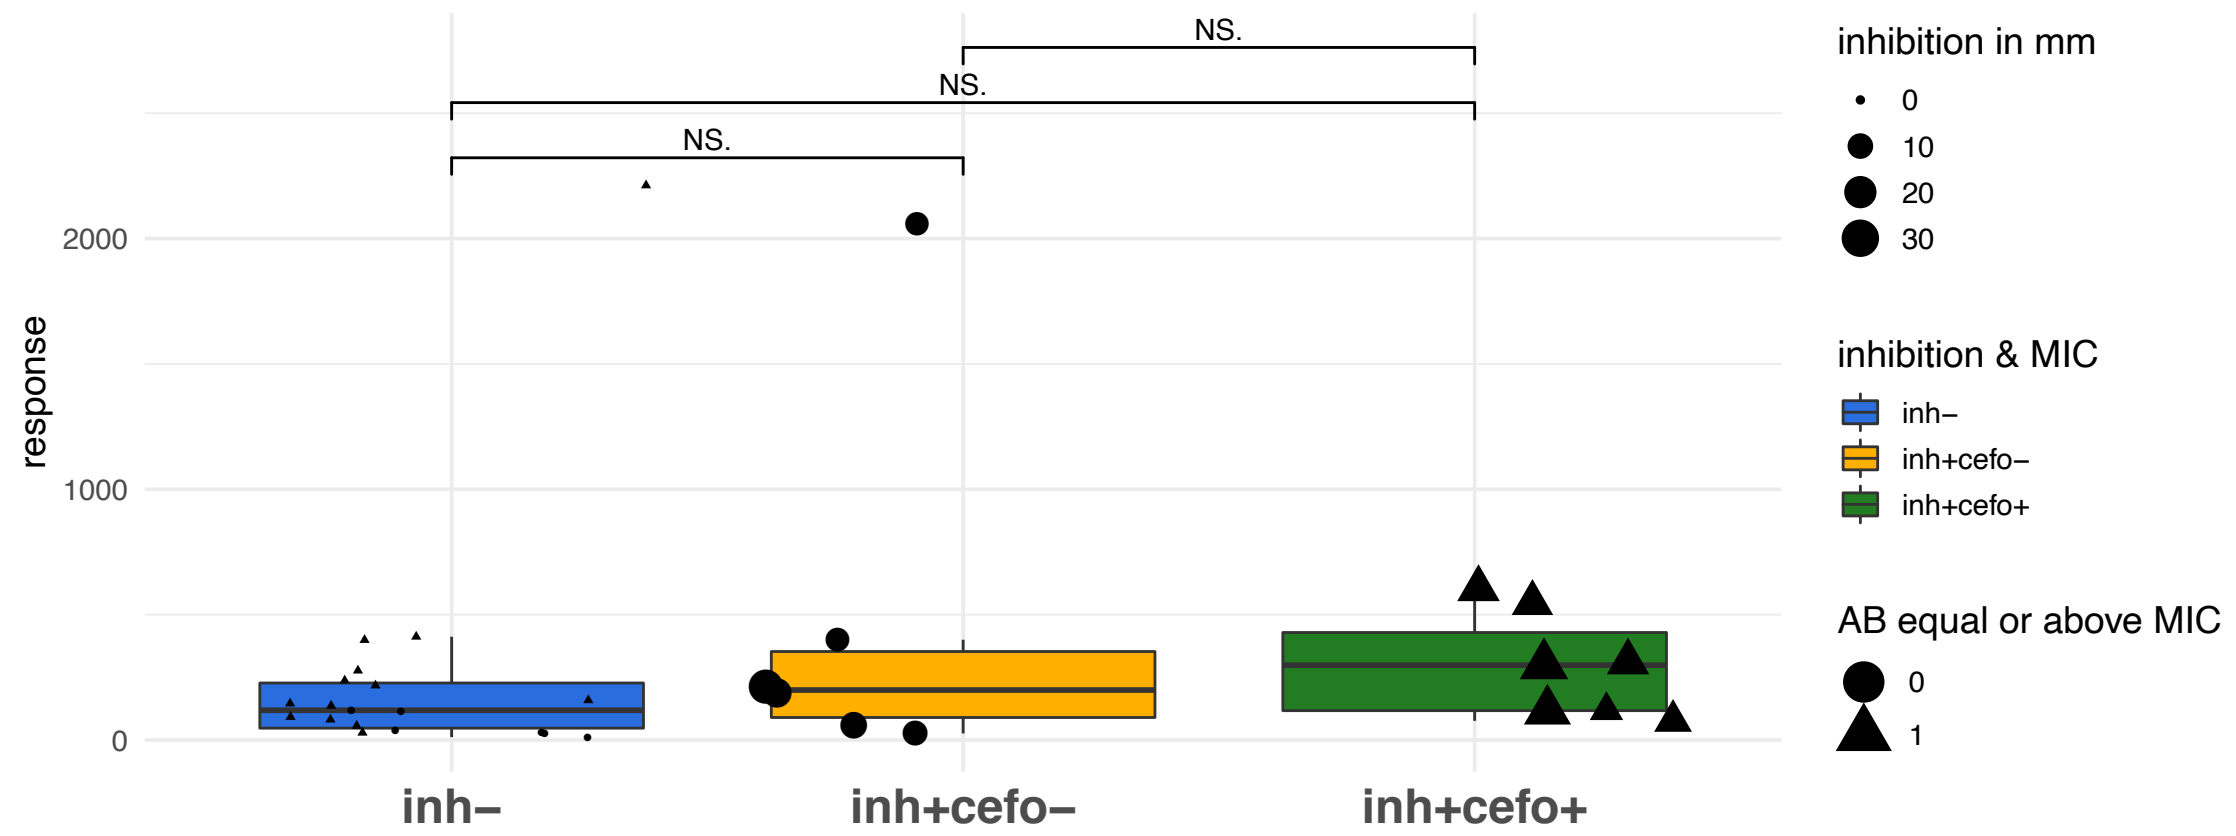

NS >0.05, \* <0.05, \*\* <0.01, \*\*\* <0.001

B

# MsrAB2

y-axis = log<sub>10</sub>-scale

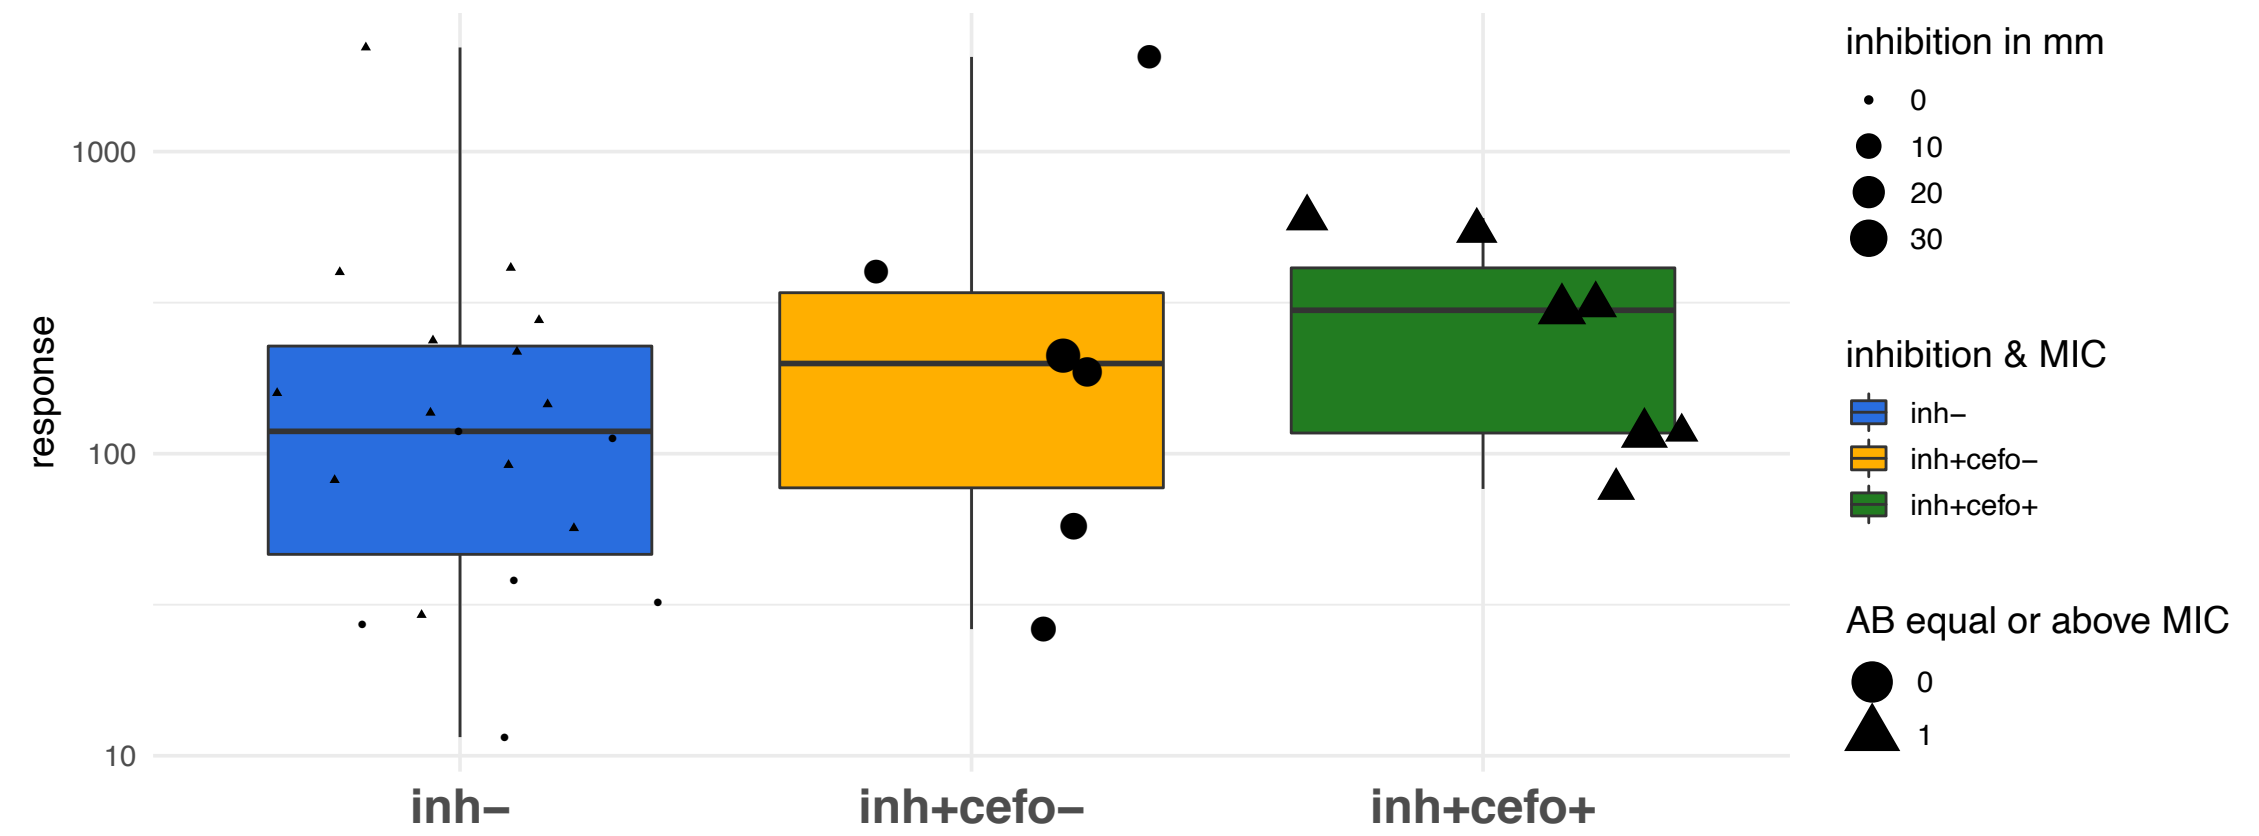

A

## NanA

unpaired wilcoxon test

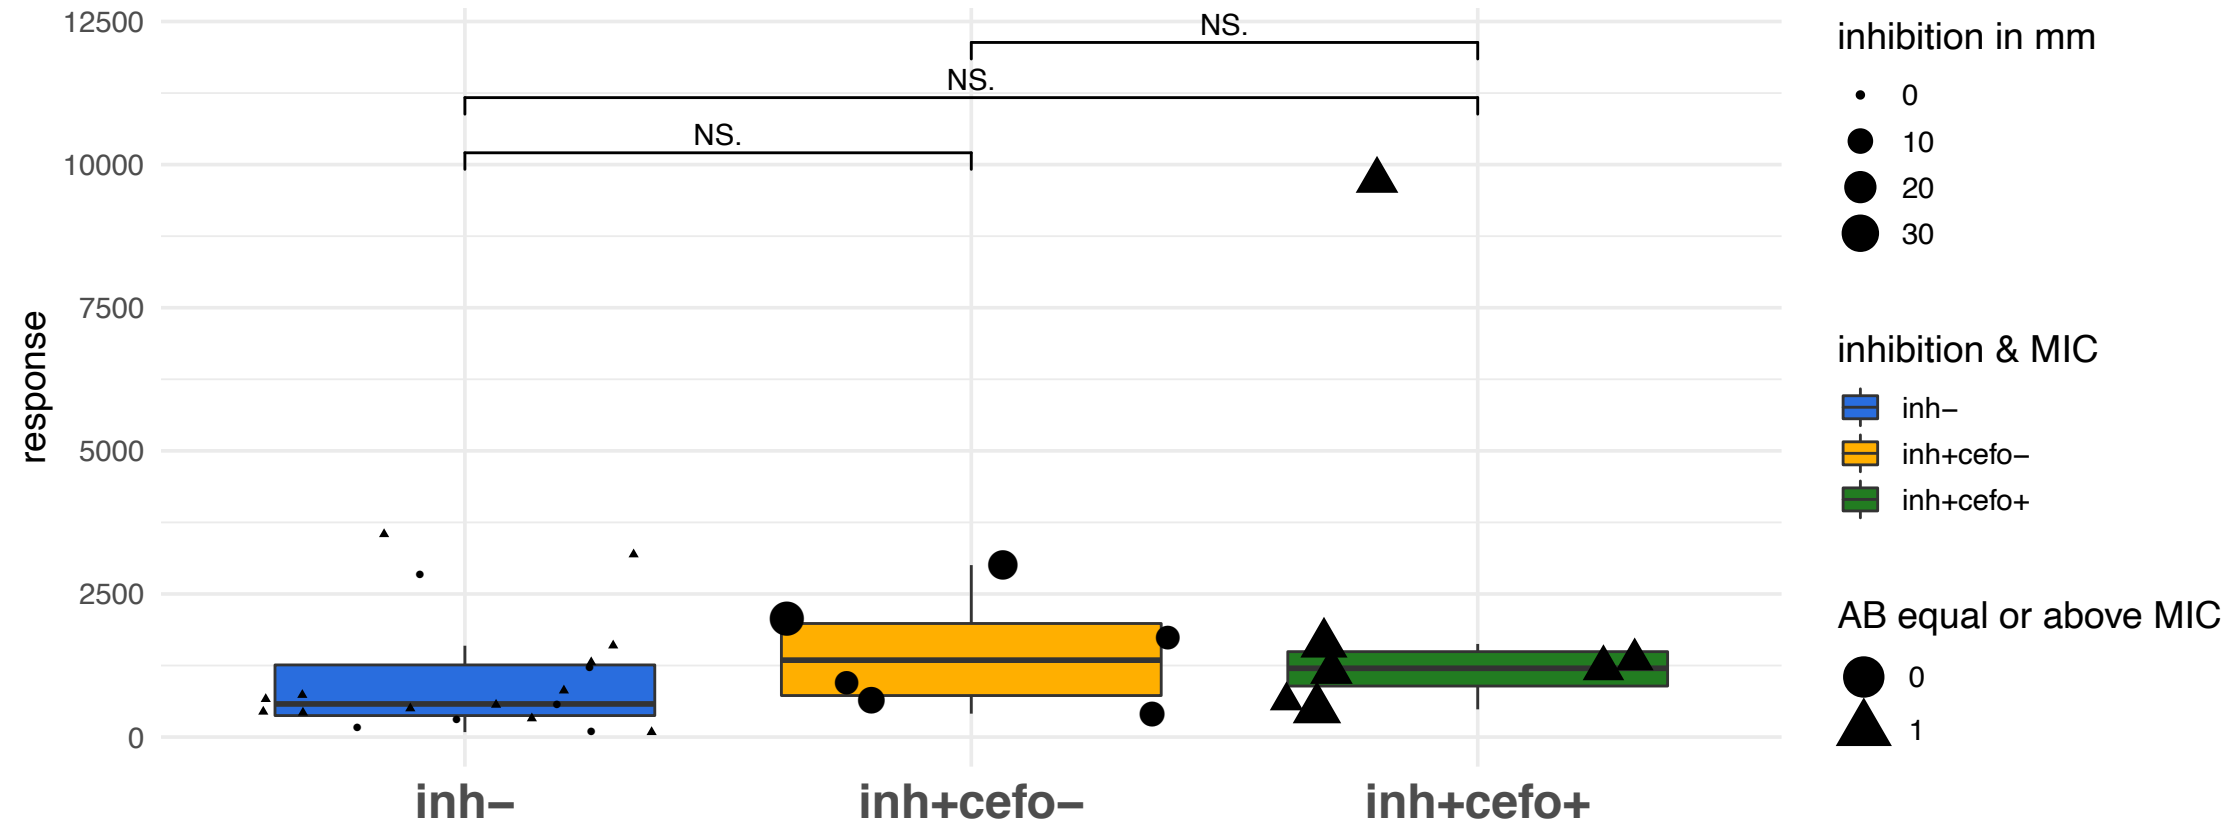

NS &gt;0.05, \* &lt;0.05, \*\* &lt;0.01, \*\*\* &lt;0.001

B

## NanA

y-axis = log<sub>10</sub>-scale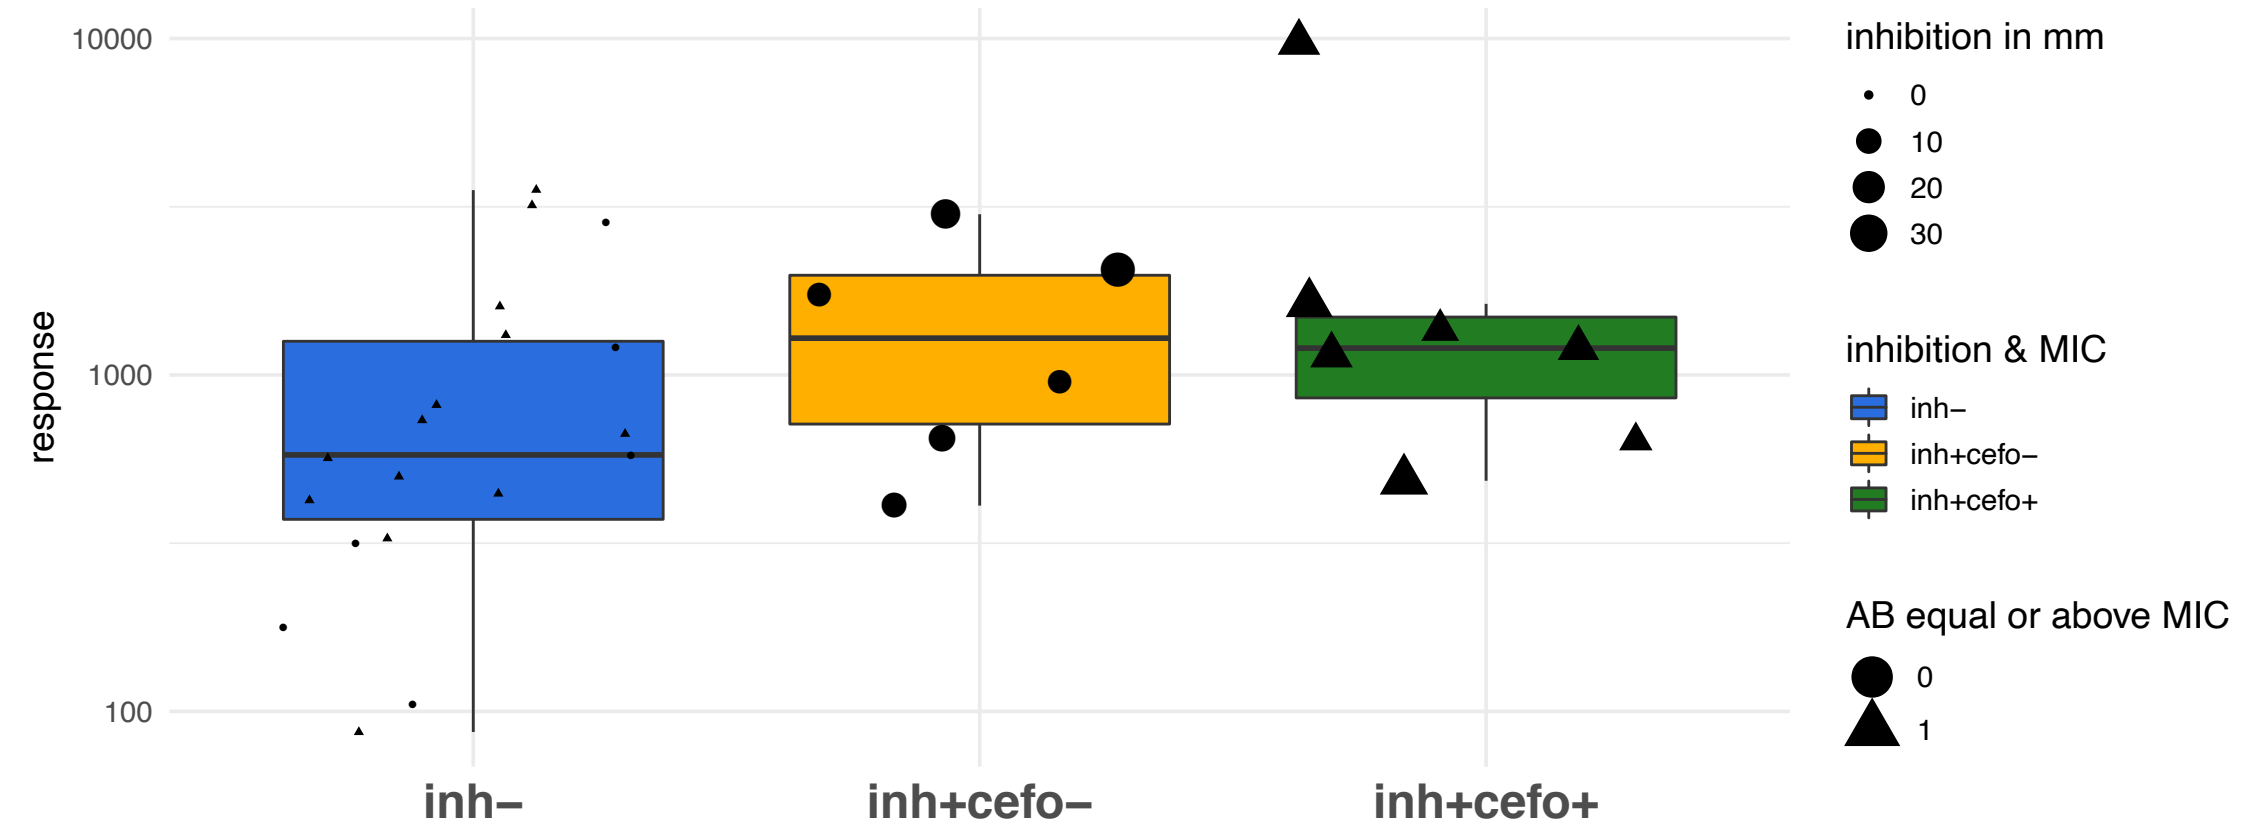



A

## PavB

unpaired wilcoxon test

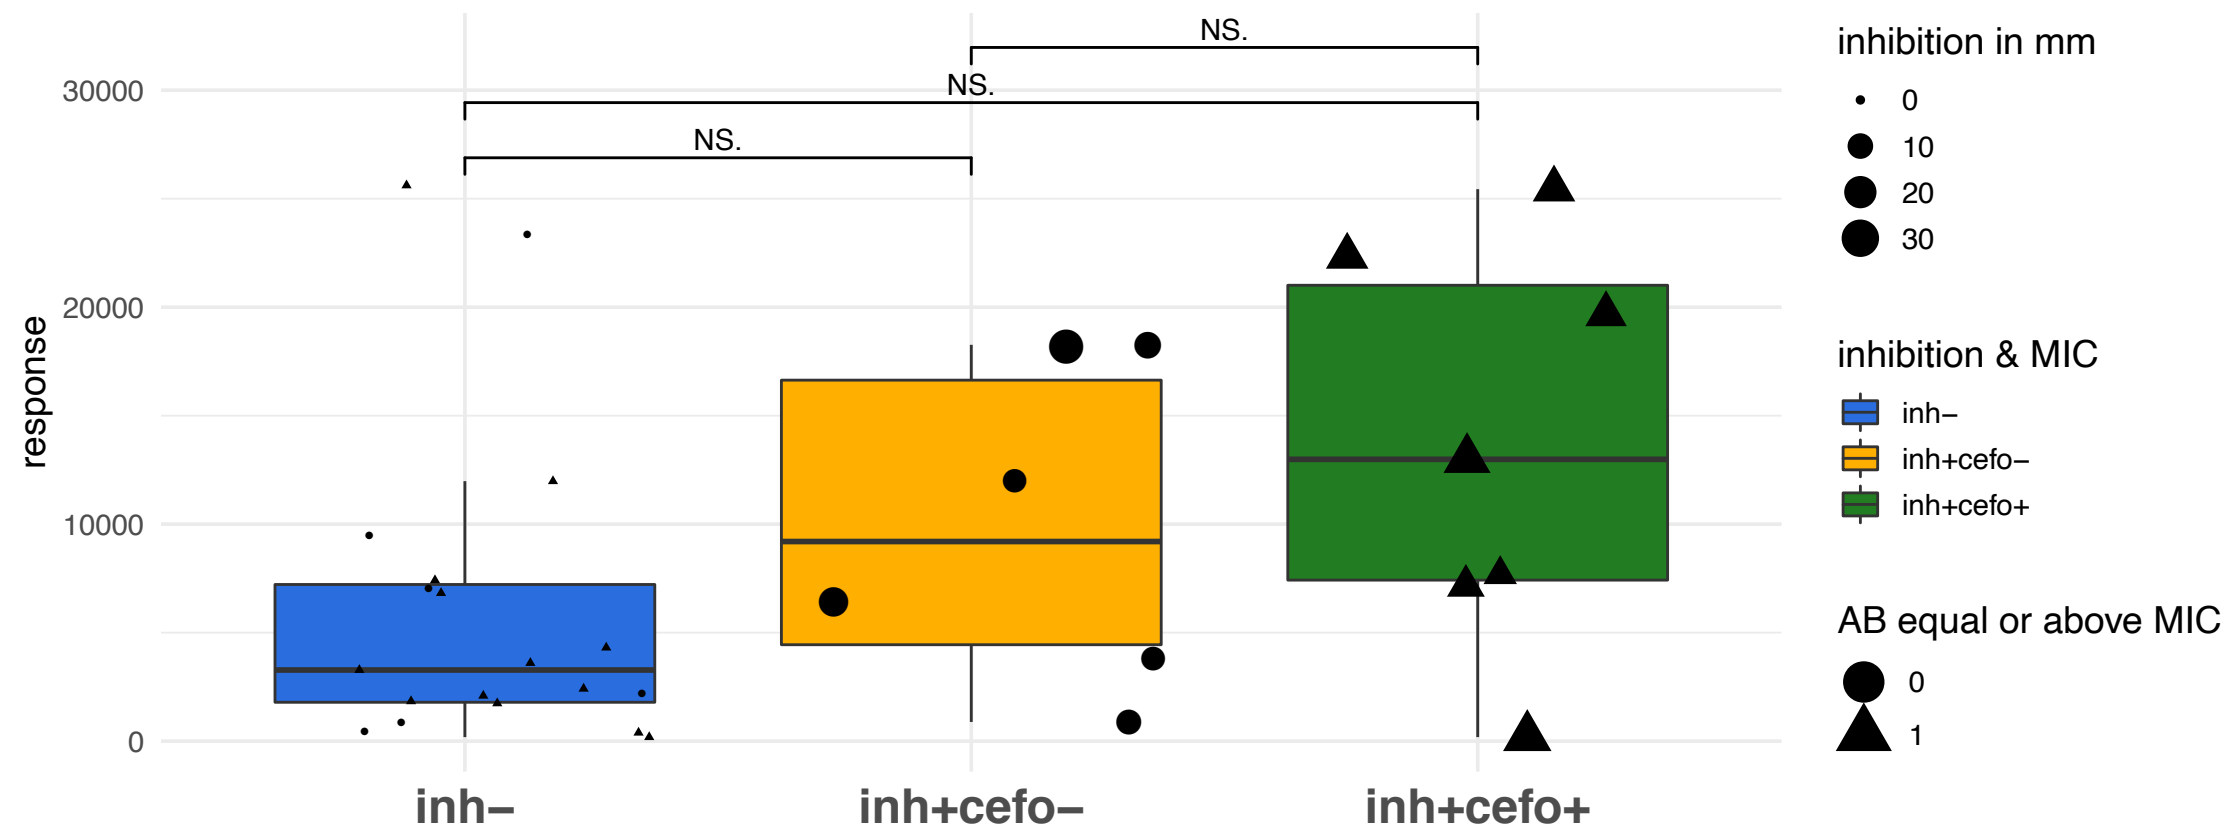

NS &gt;0.05, \* &lt;0.05, \*\* &lt;0.01, \*\*\* &lt;0.001

B

## PavB

y-axis = log10-scale

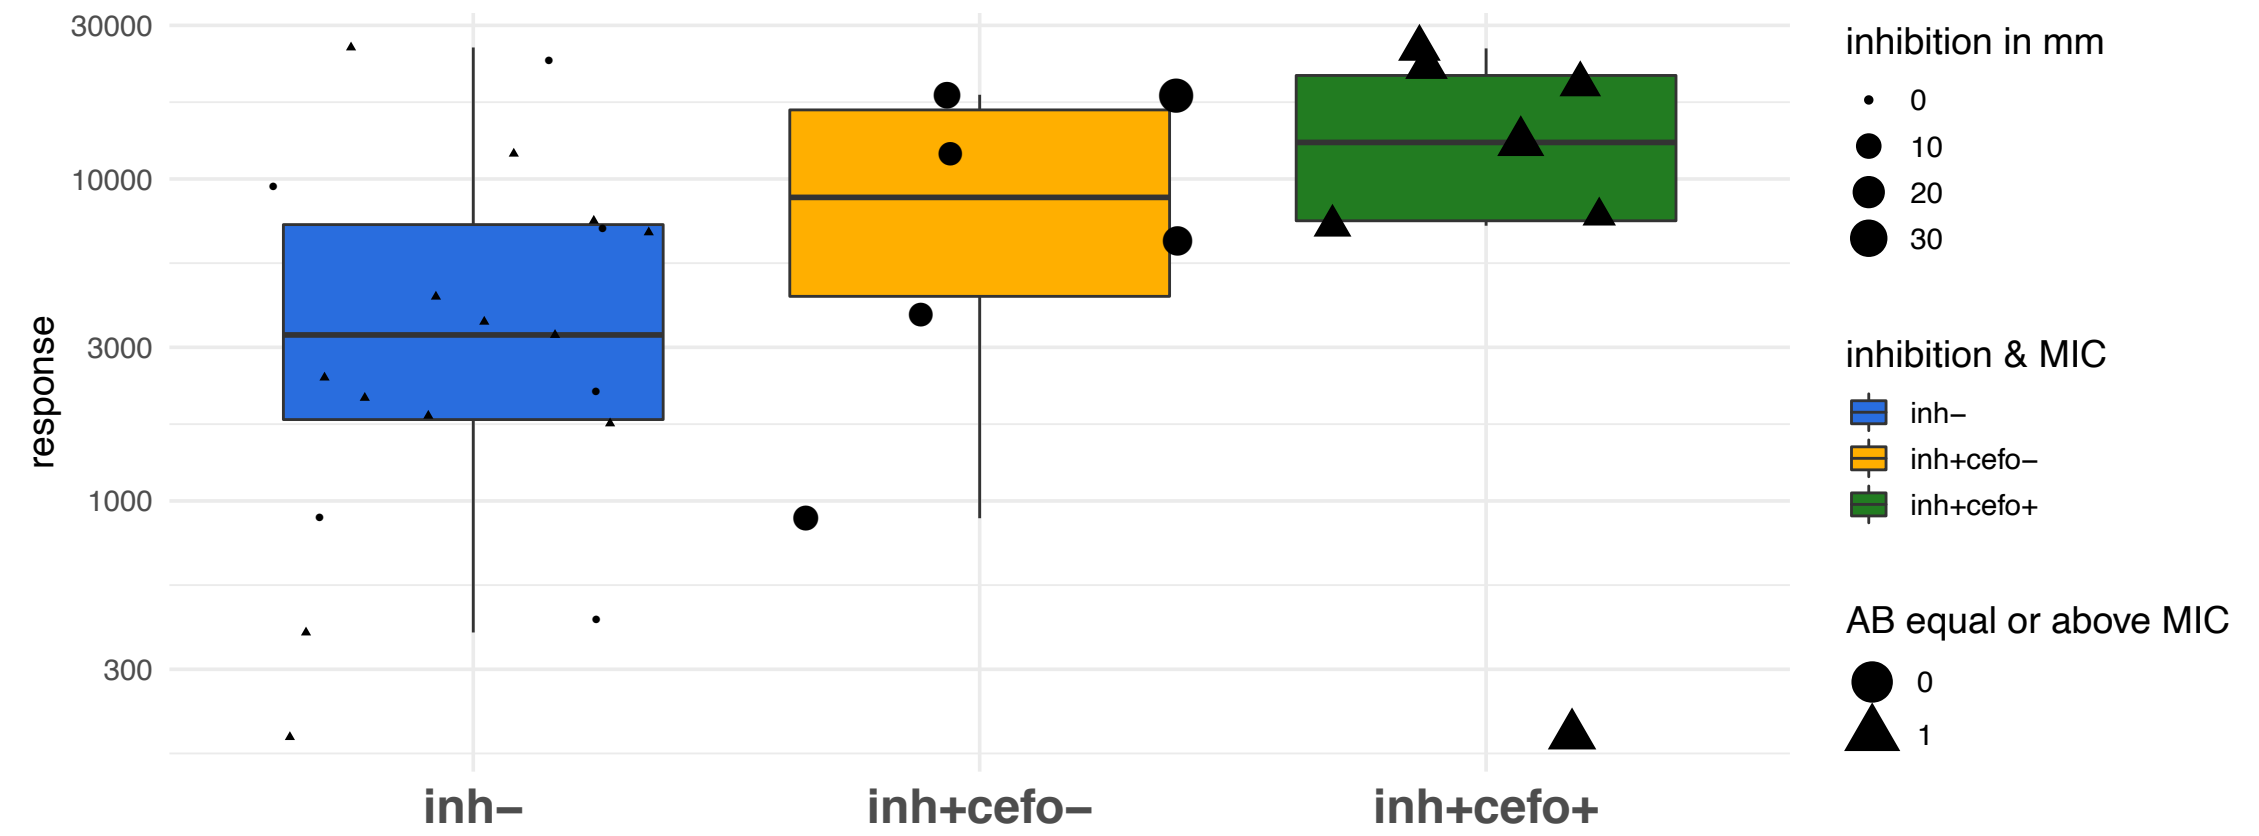

A

## PccL

unpaired wilcoxon test

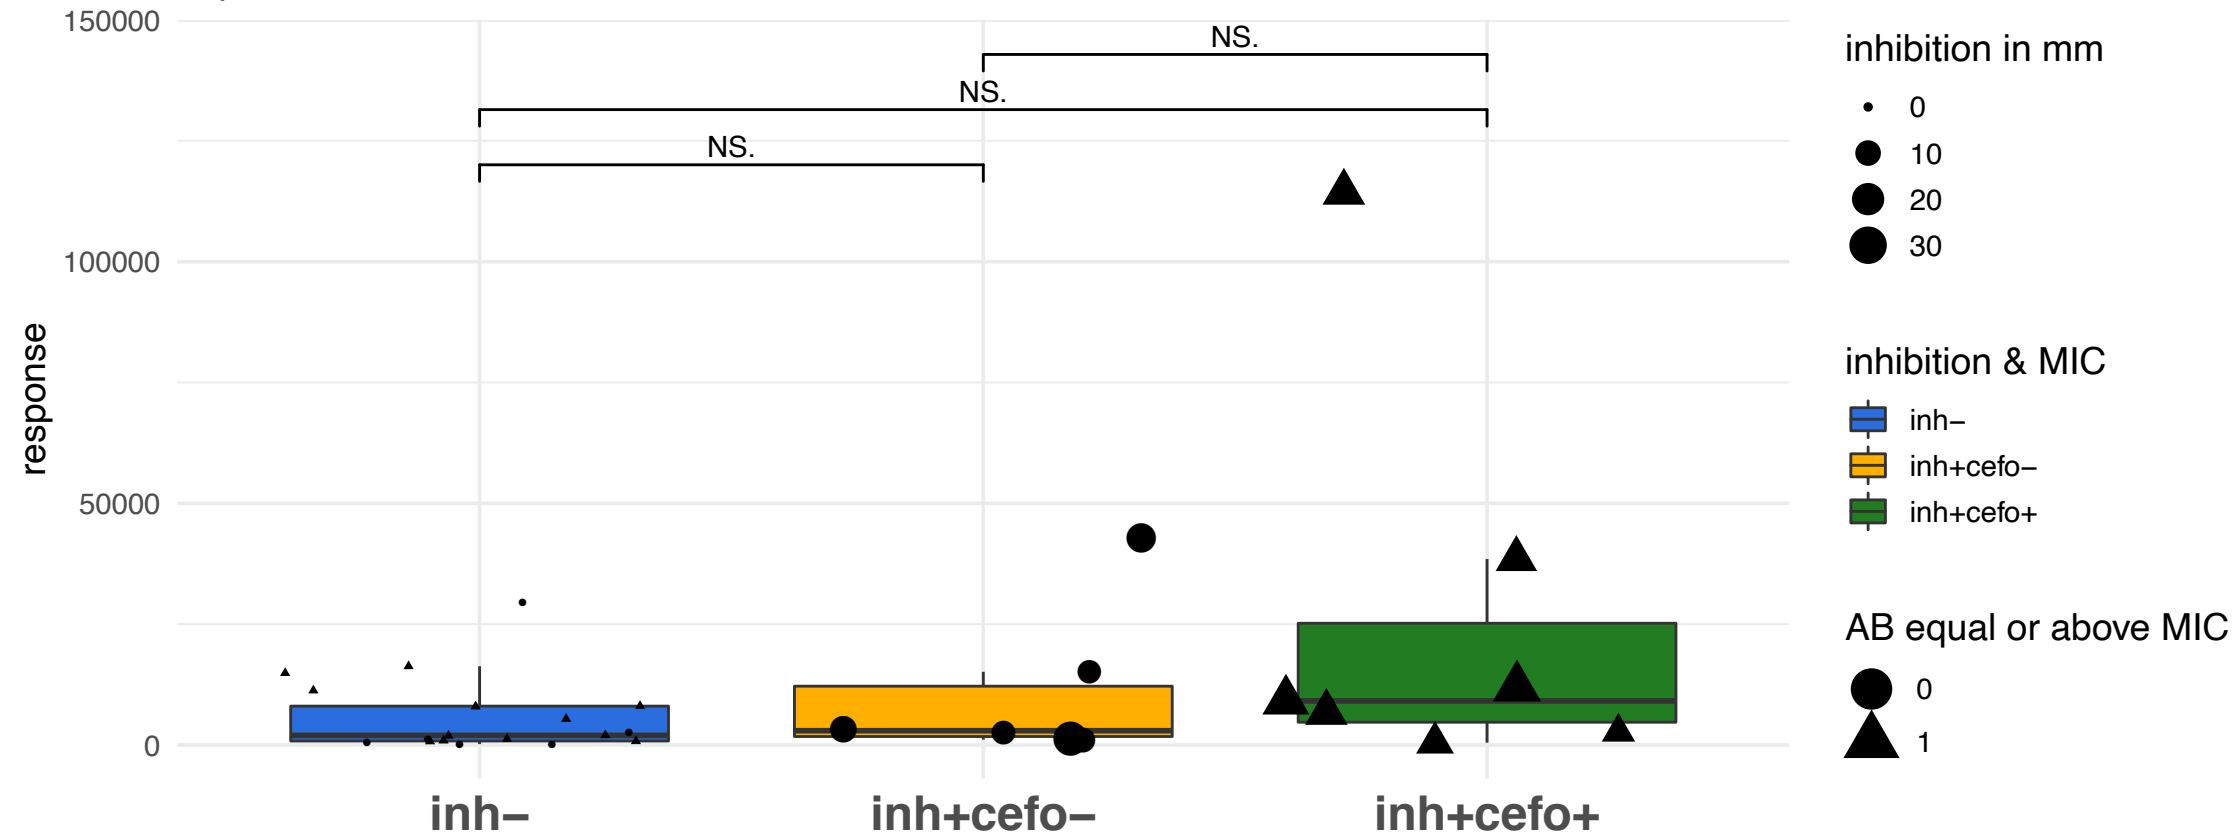

NS &gt;0.05, \* &lt;0.05, \*\* &lt;0.01, \*\*\* &lt;0.001

B

## PccL

y-axis = log<sub>10</sub>-scale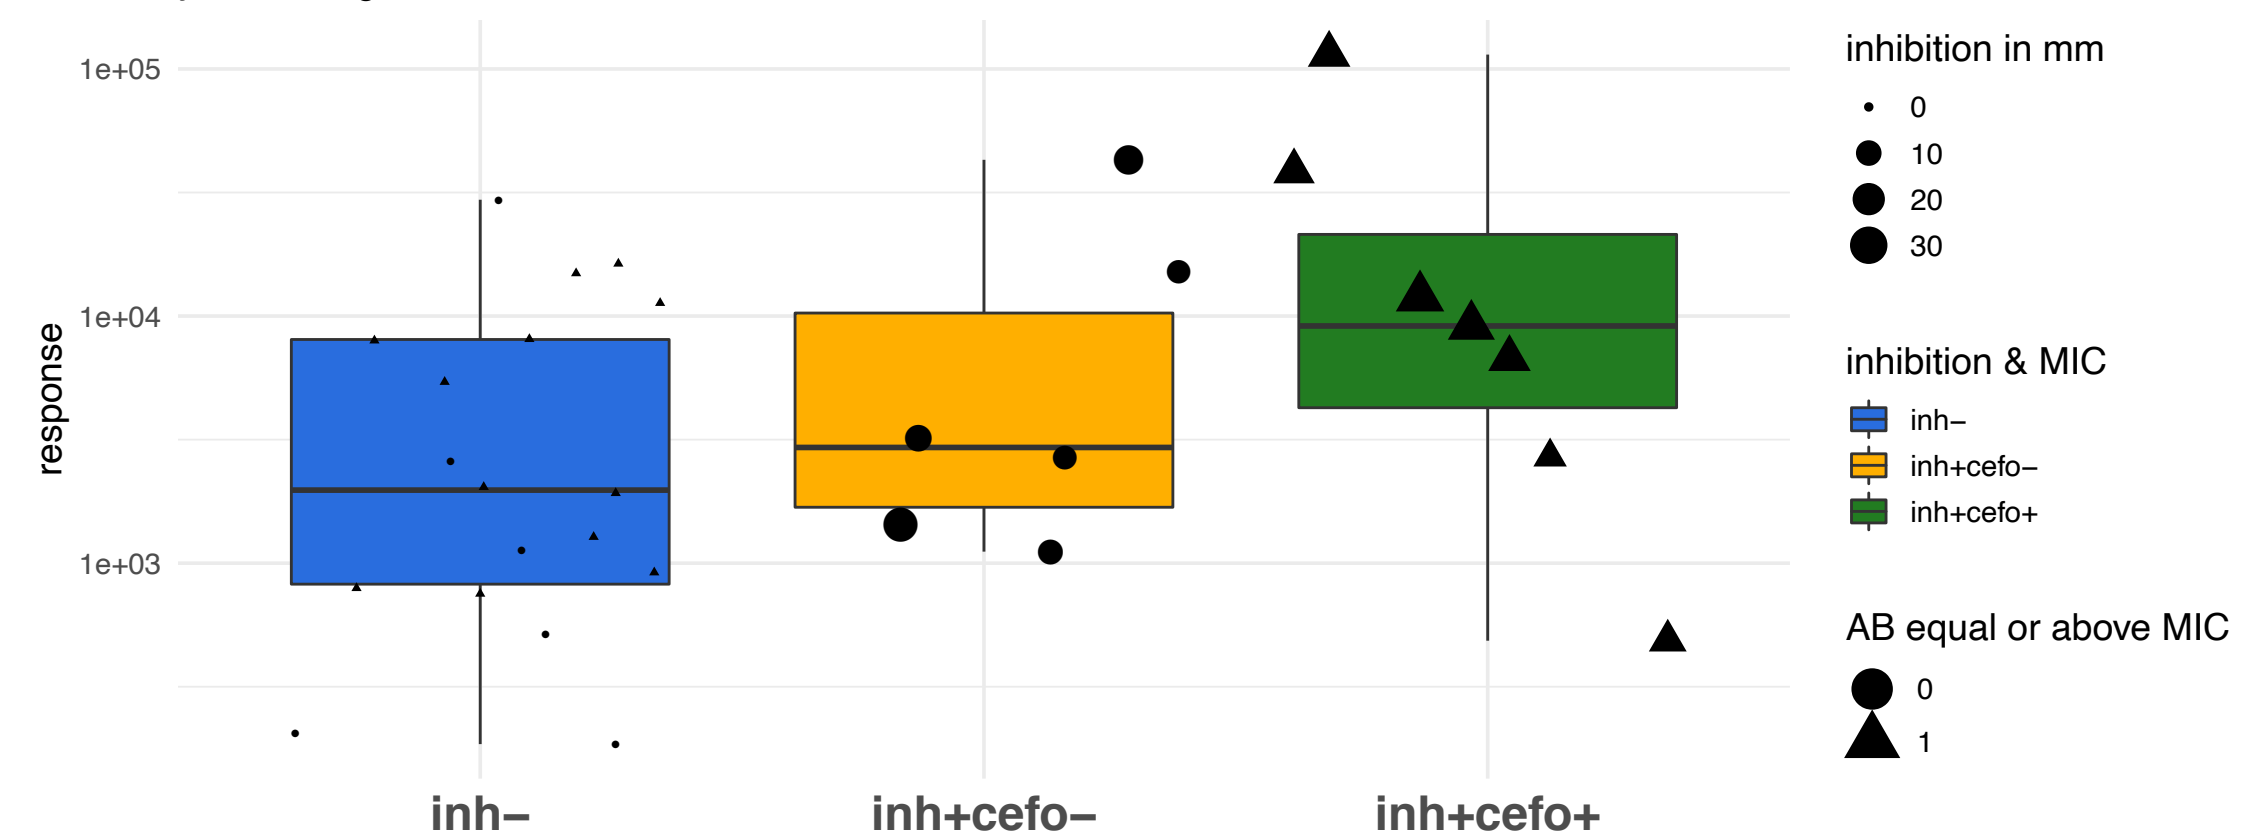

A

## PcpA

unpaired wilcoxon test

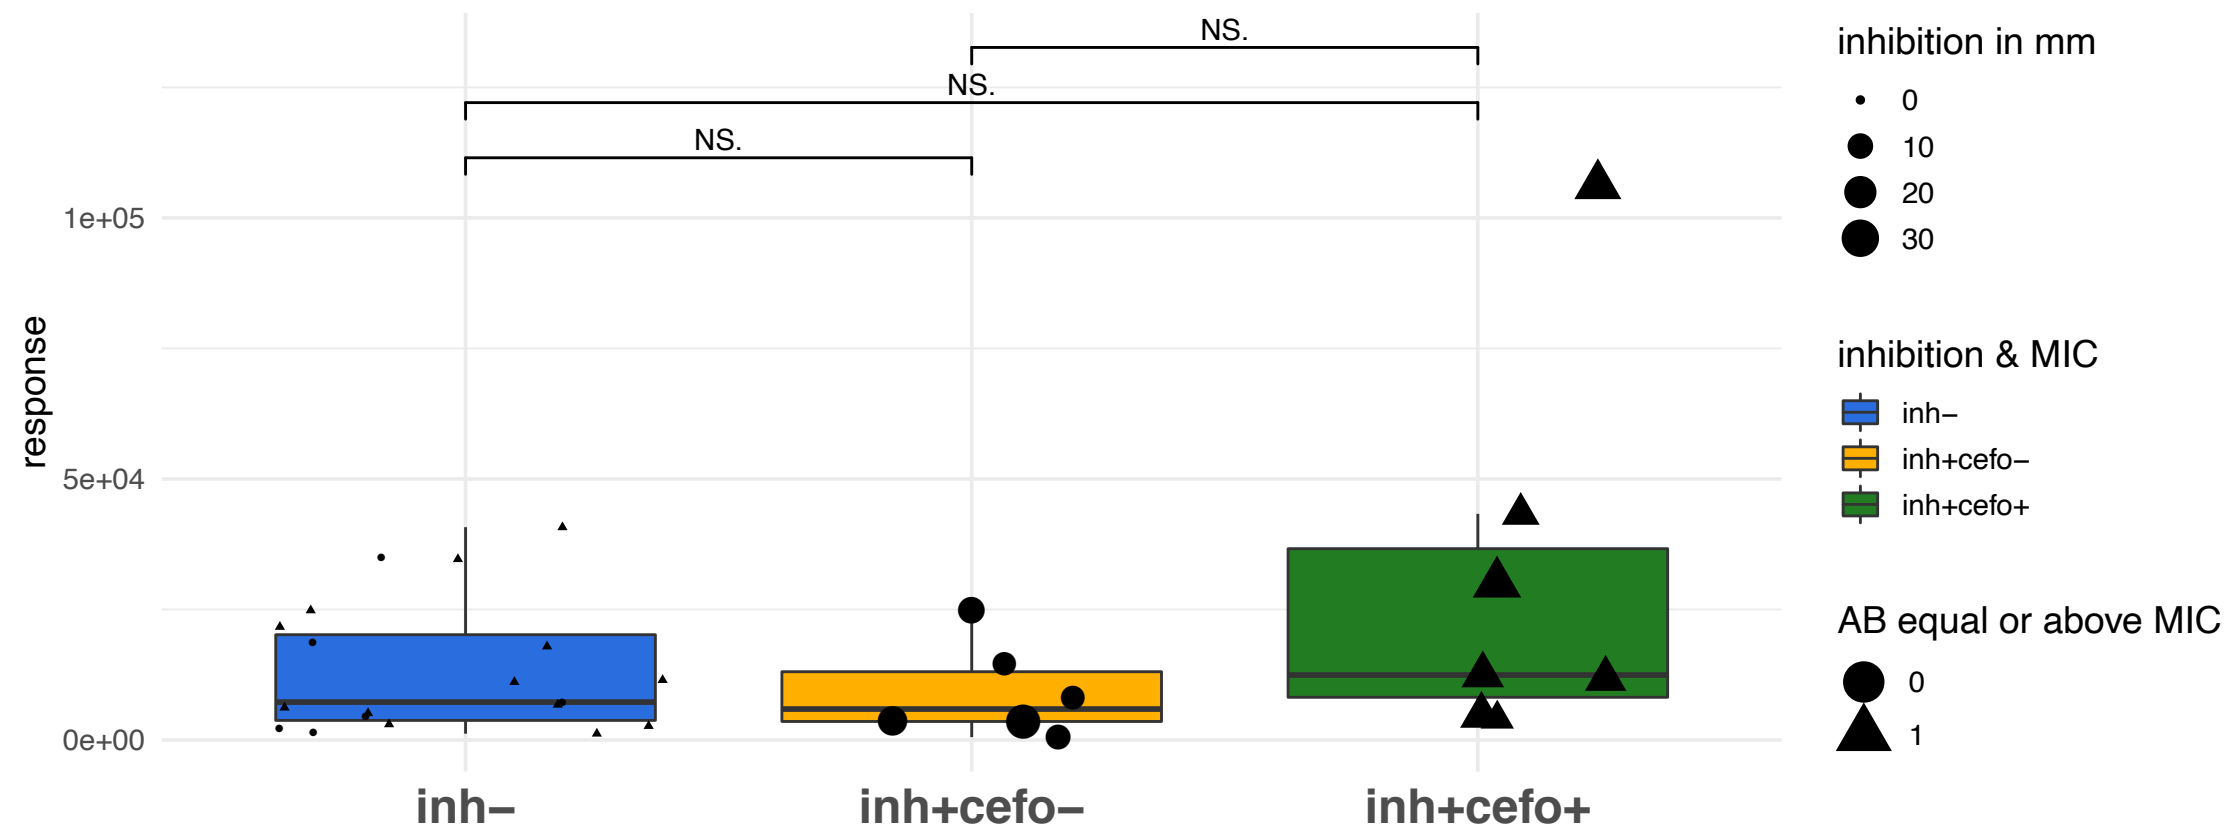

NS &gt;0.05, \* &lt;0.05, \*\* &lt;0.01, \*\*\* &lt;0.001

B

## PcpA

y-axis = log10-scale

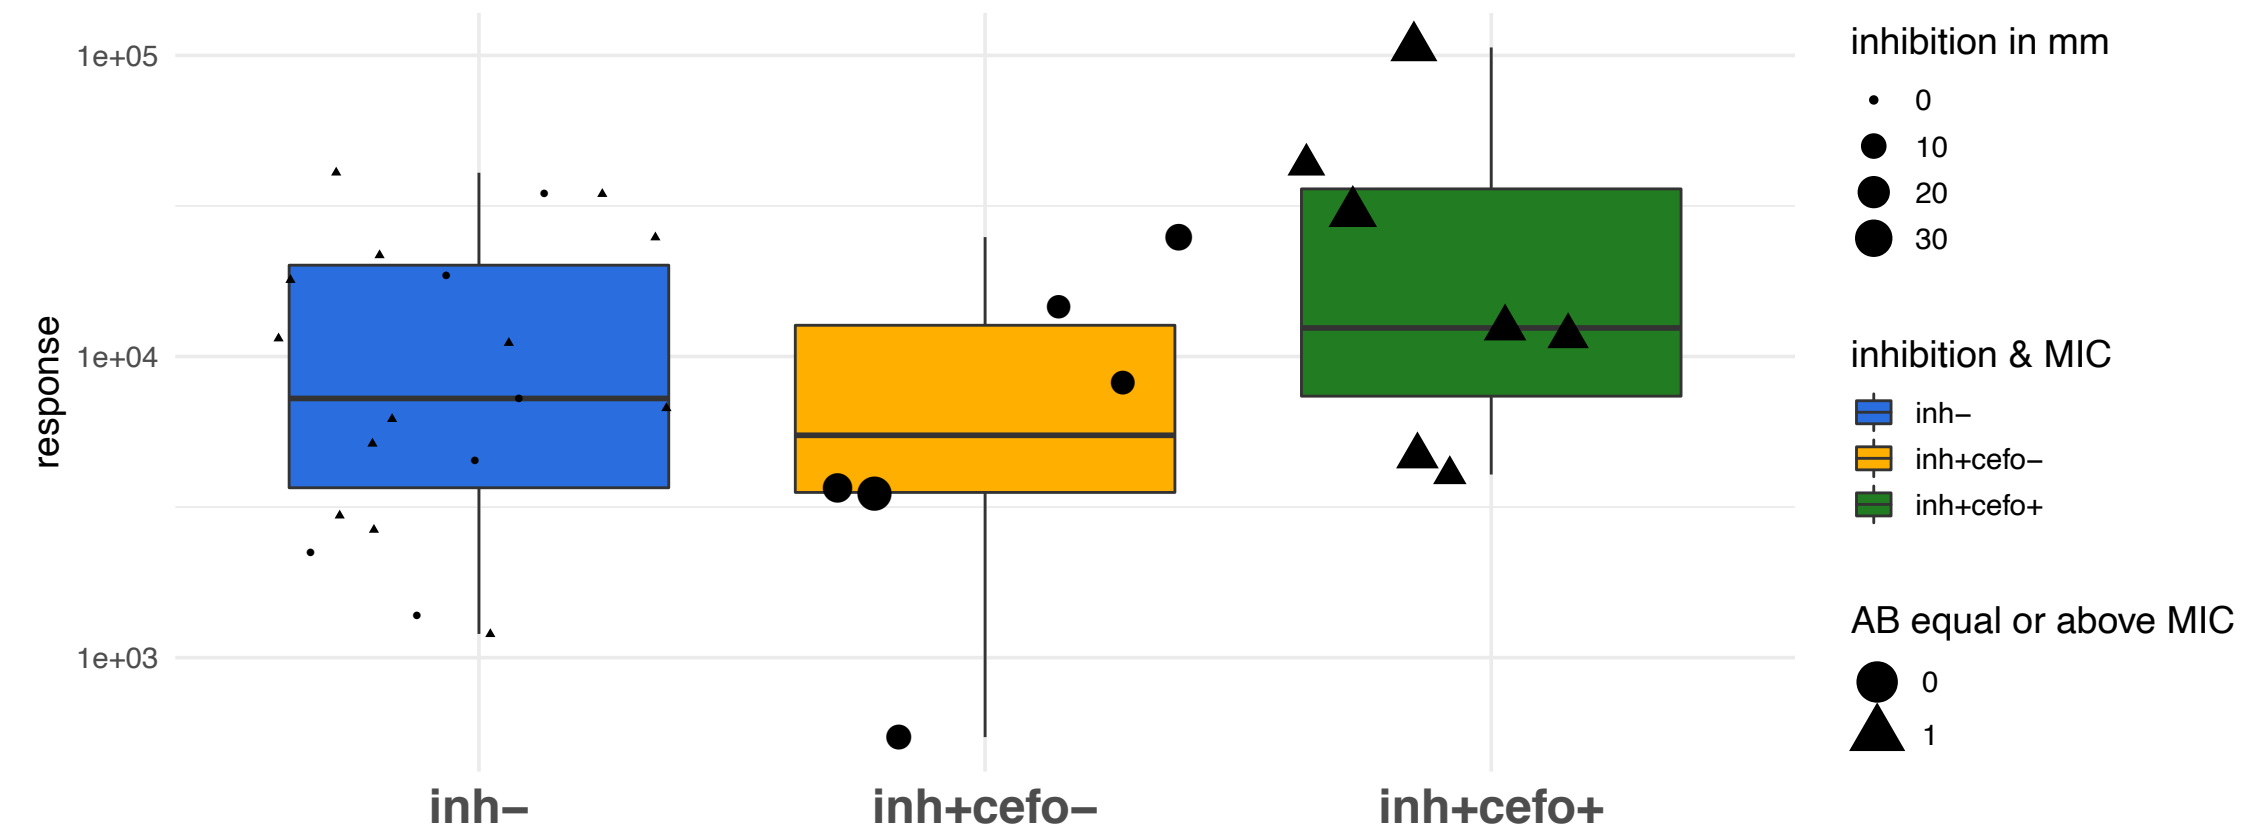

A

## PcsB

unpaired wilcoxon test

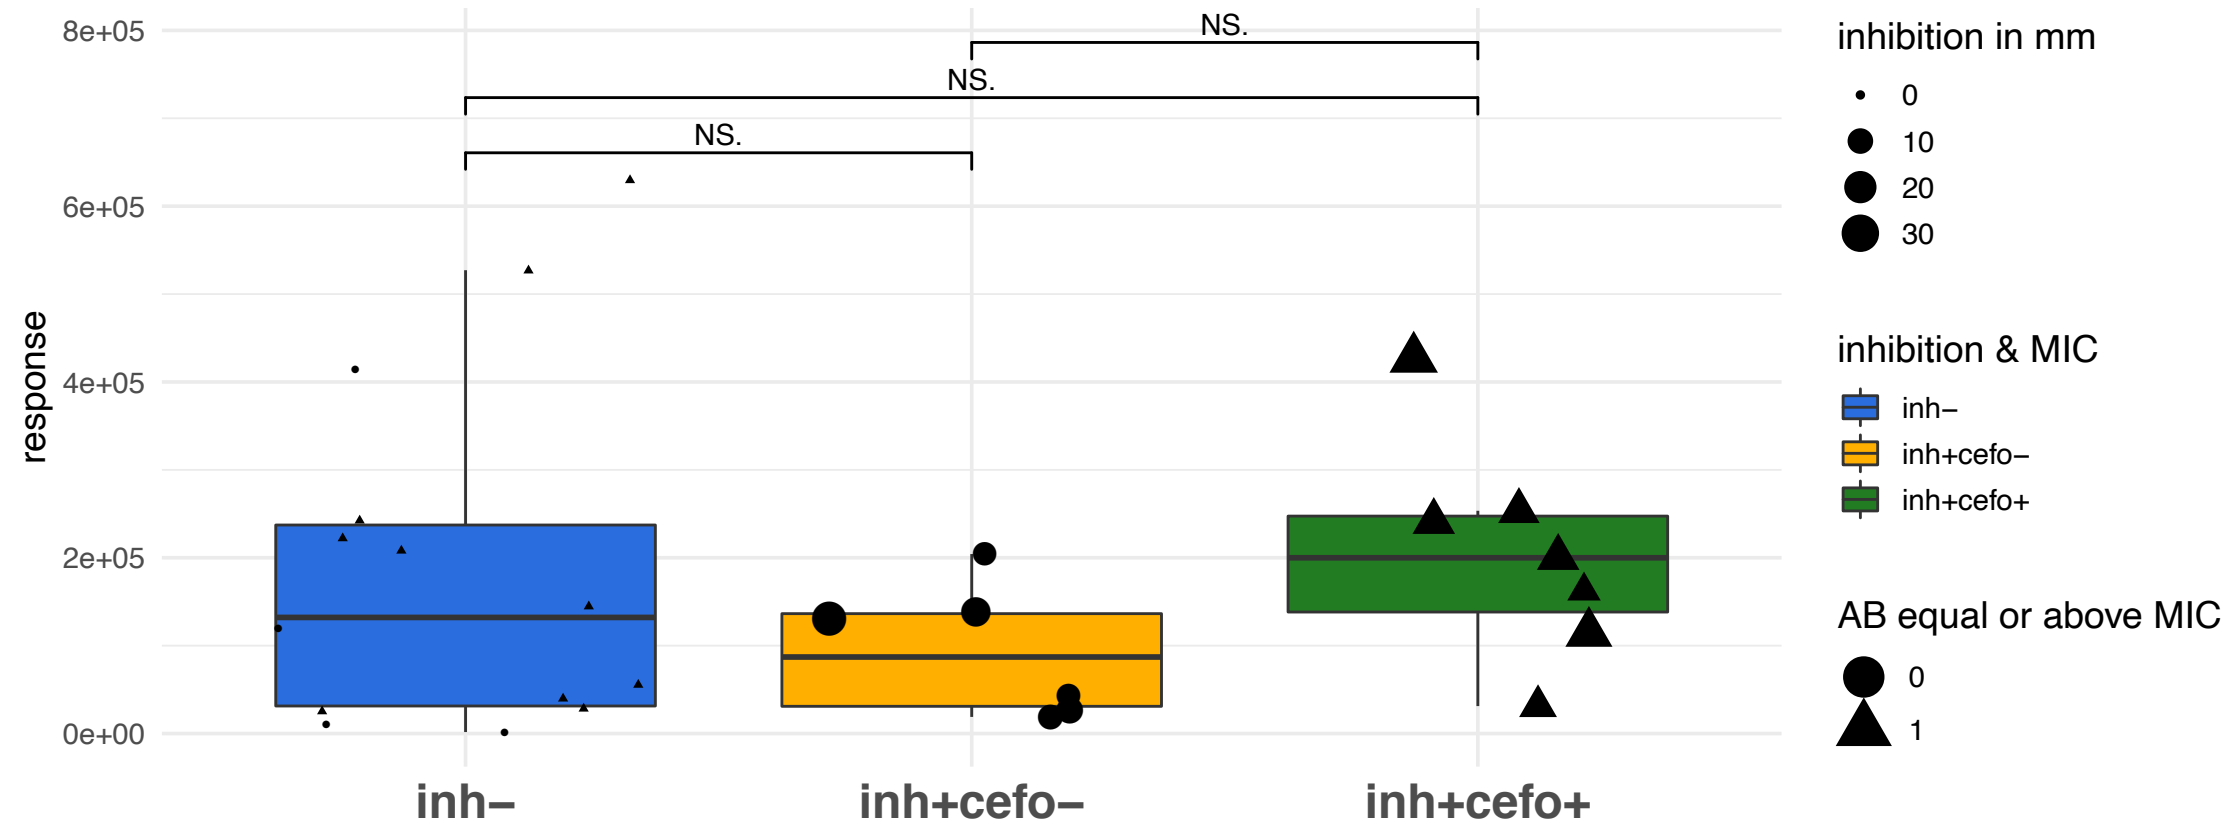

NS &gt;0.05, \* &lt;0.05, \*\* &lt;0.01, \*\*\* &lt;0.001

B

## PcsB

y-axis = log<sub>10</sub>-scale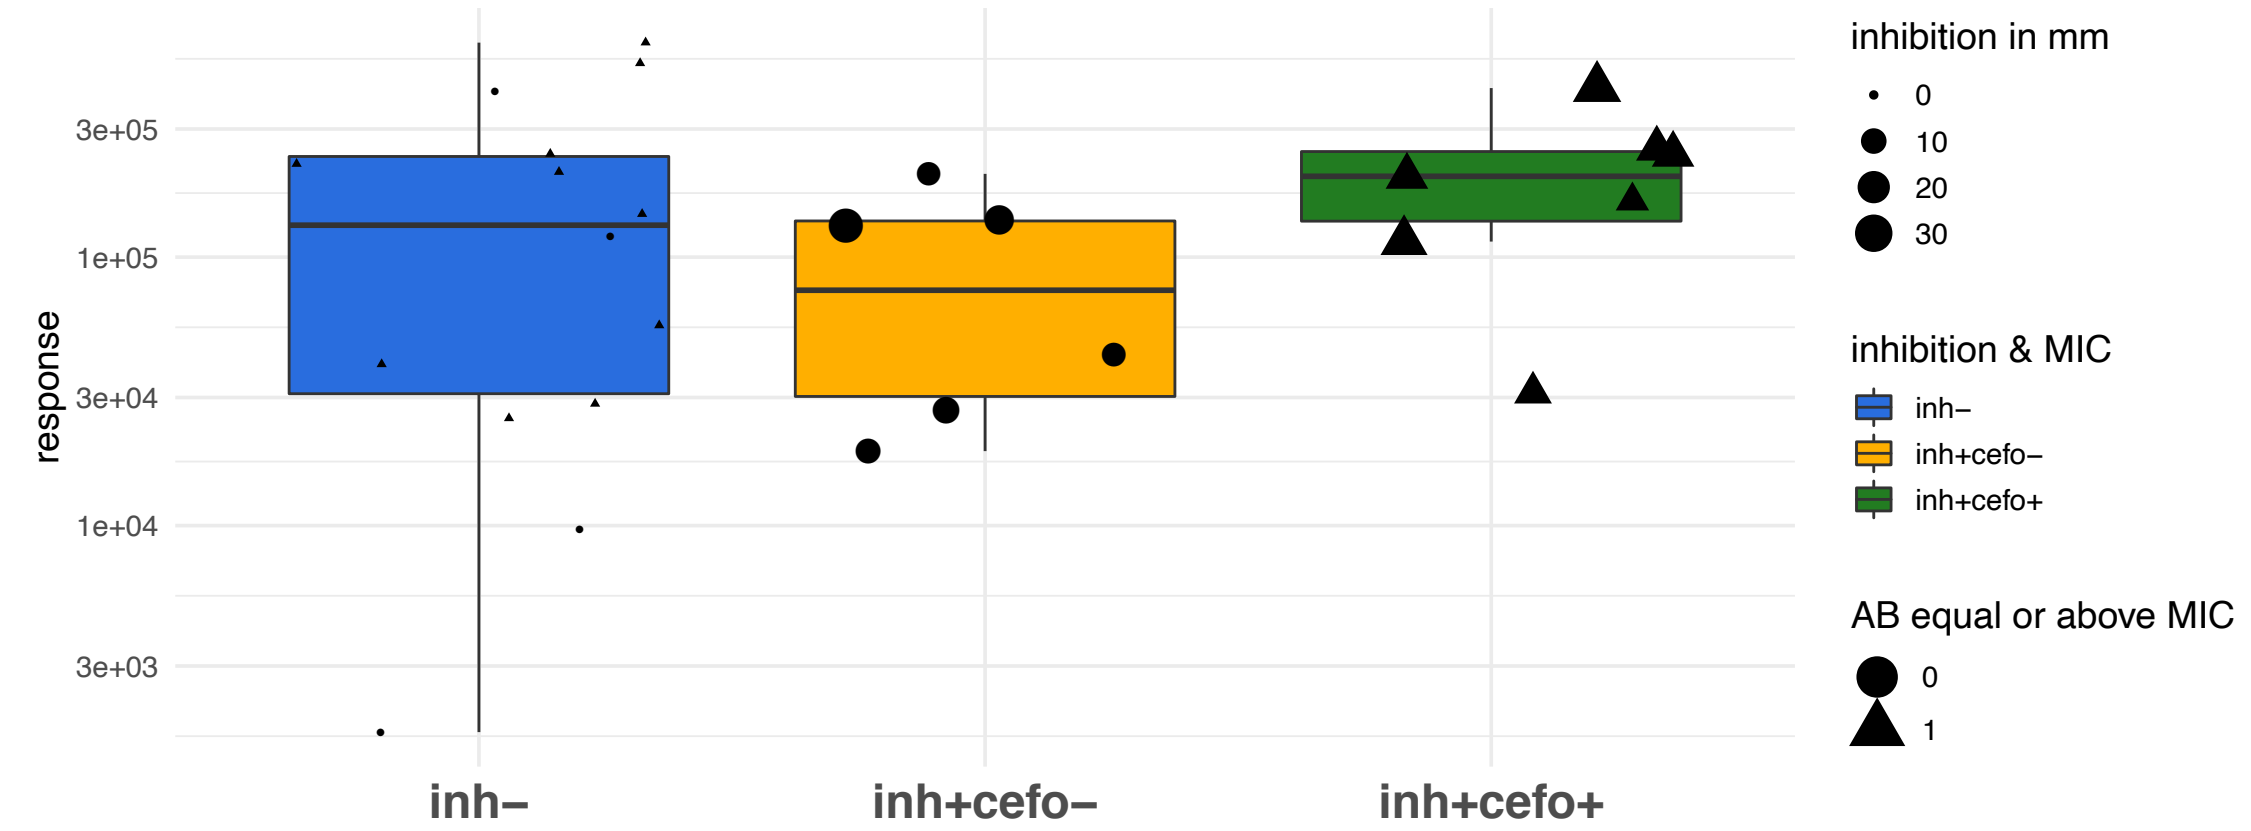

A

## PepO

unpaired wilcoxon test

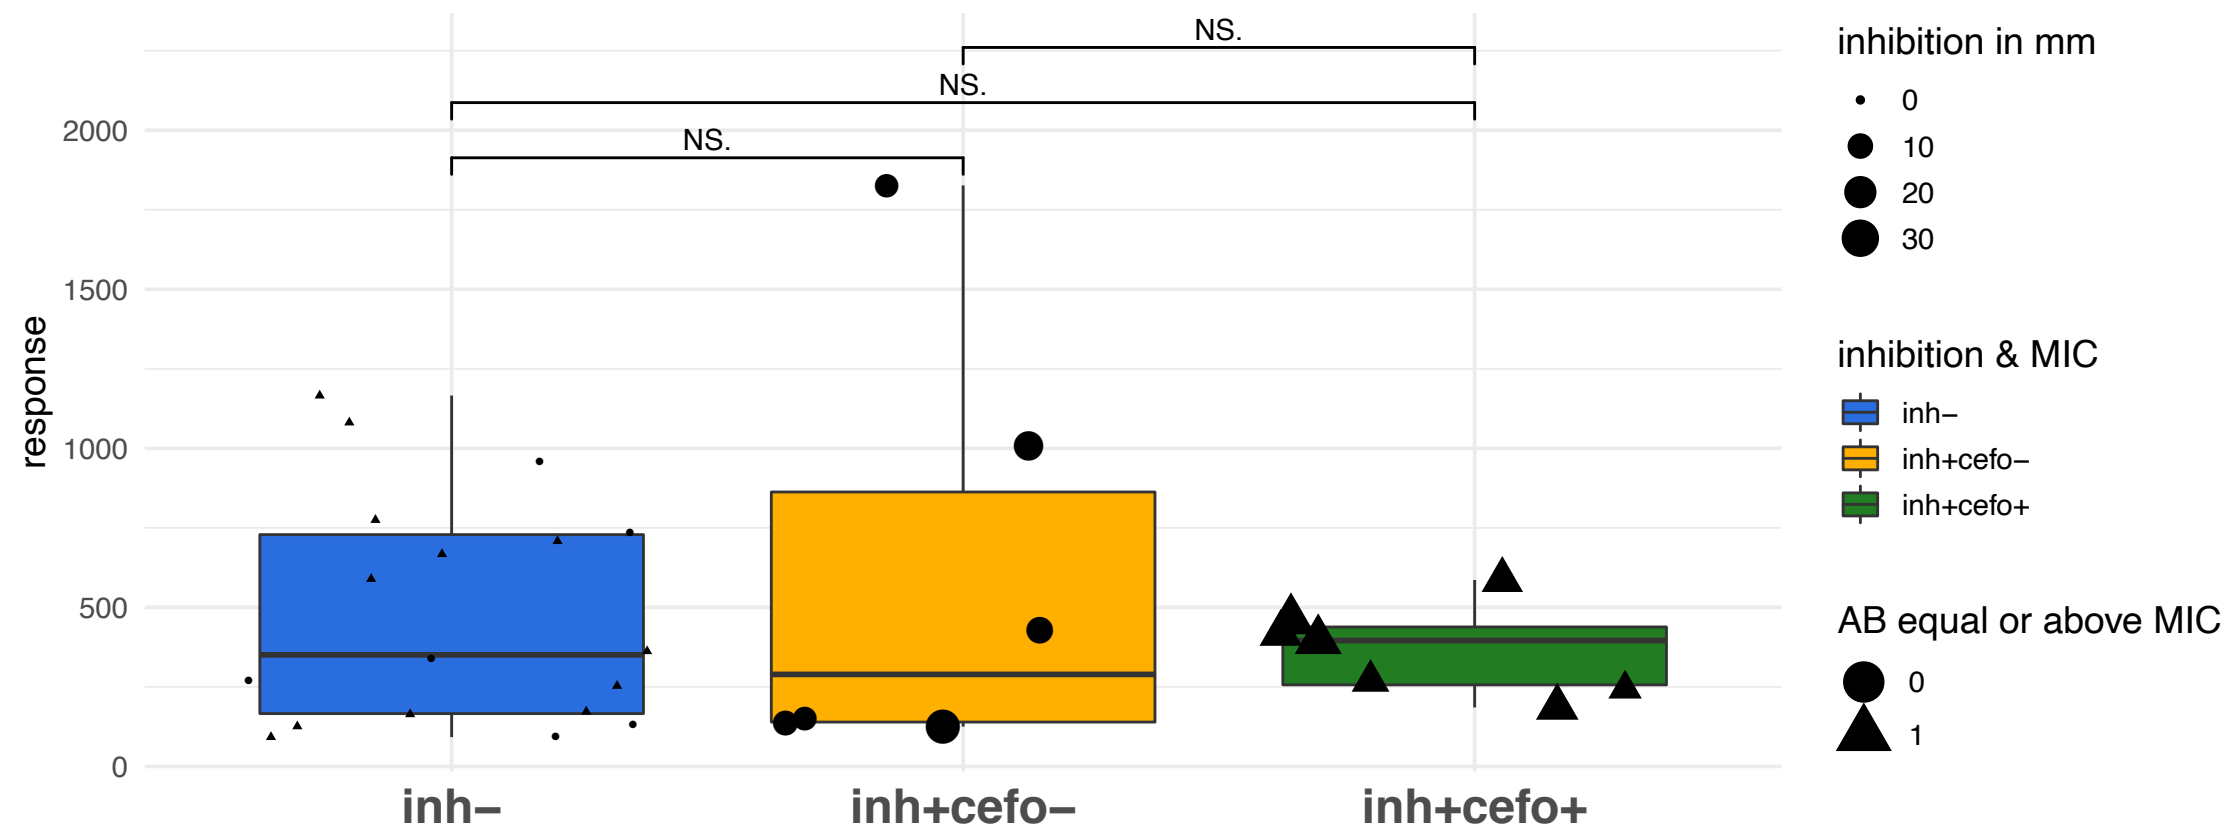

NS &gt;0.05, \* &lt;0.05, \*\* &lt;0.01, \*\*\* &lt;0.001

B

## PepO

y-axis = log10-scale

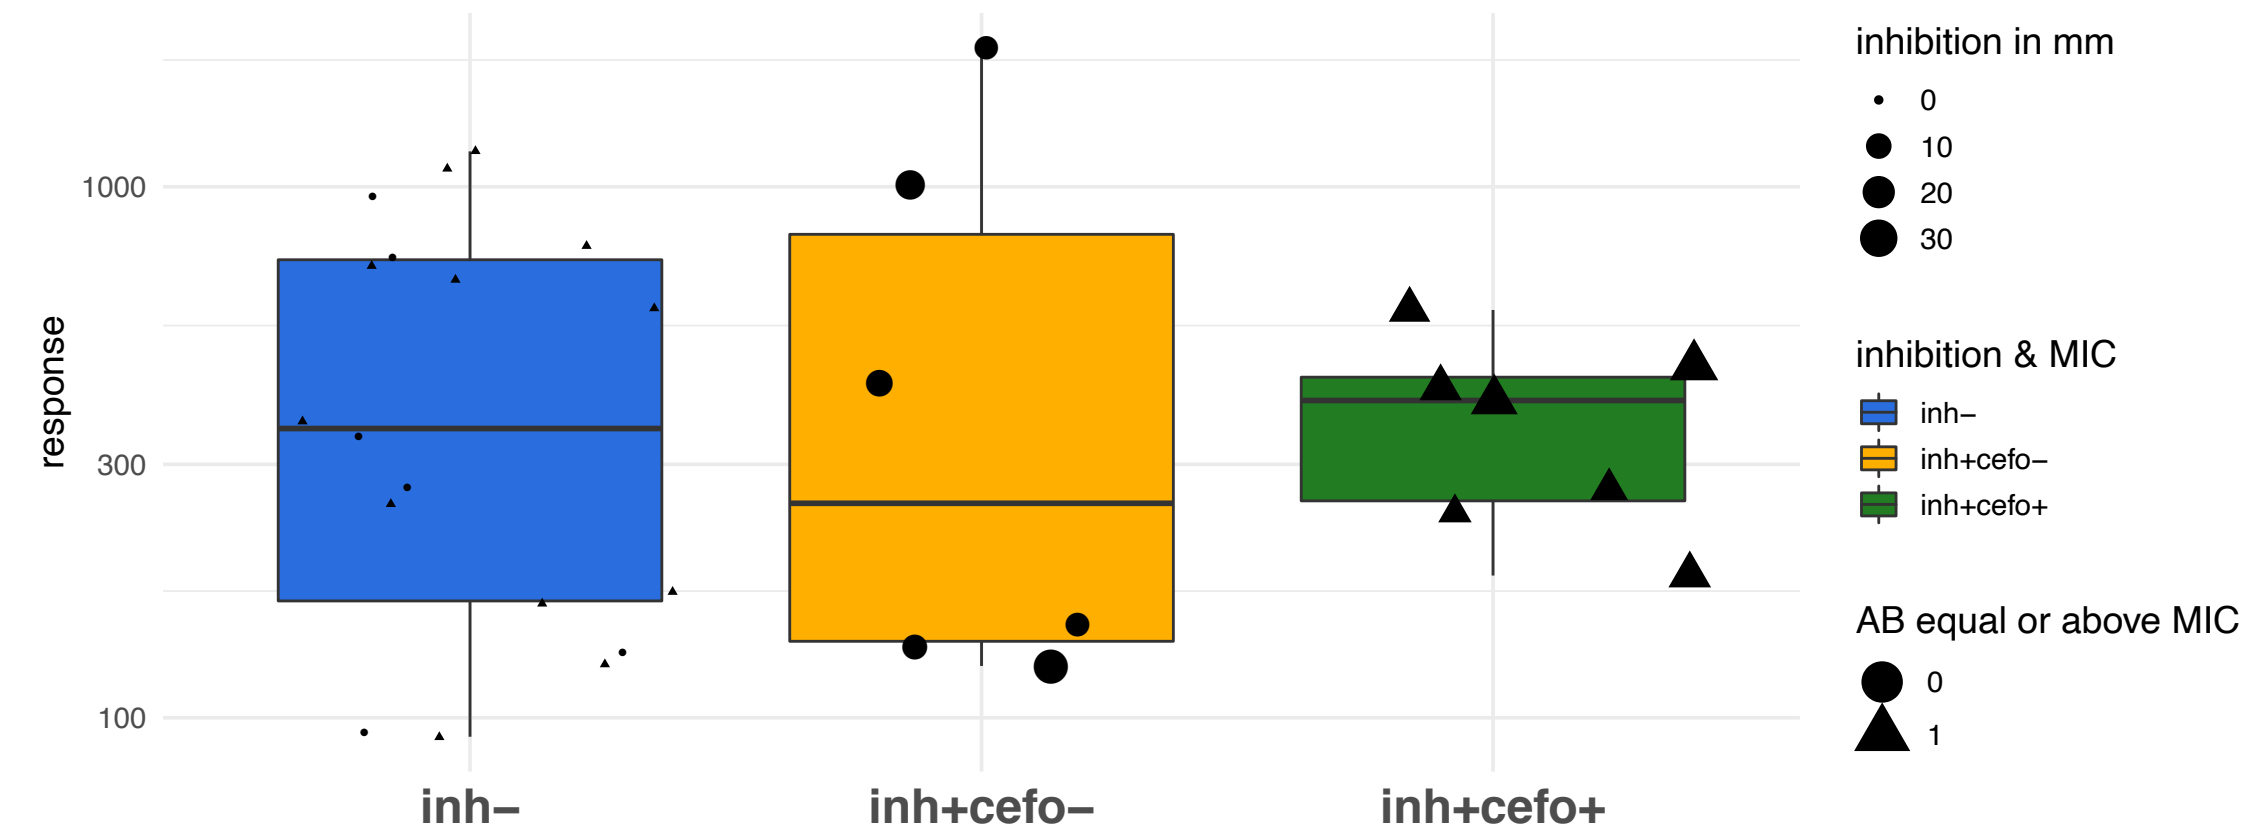

A

## PfbA

unpaired wilcoxon test

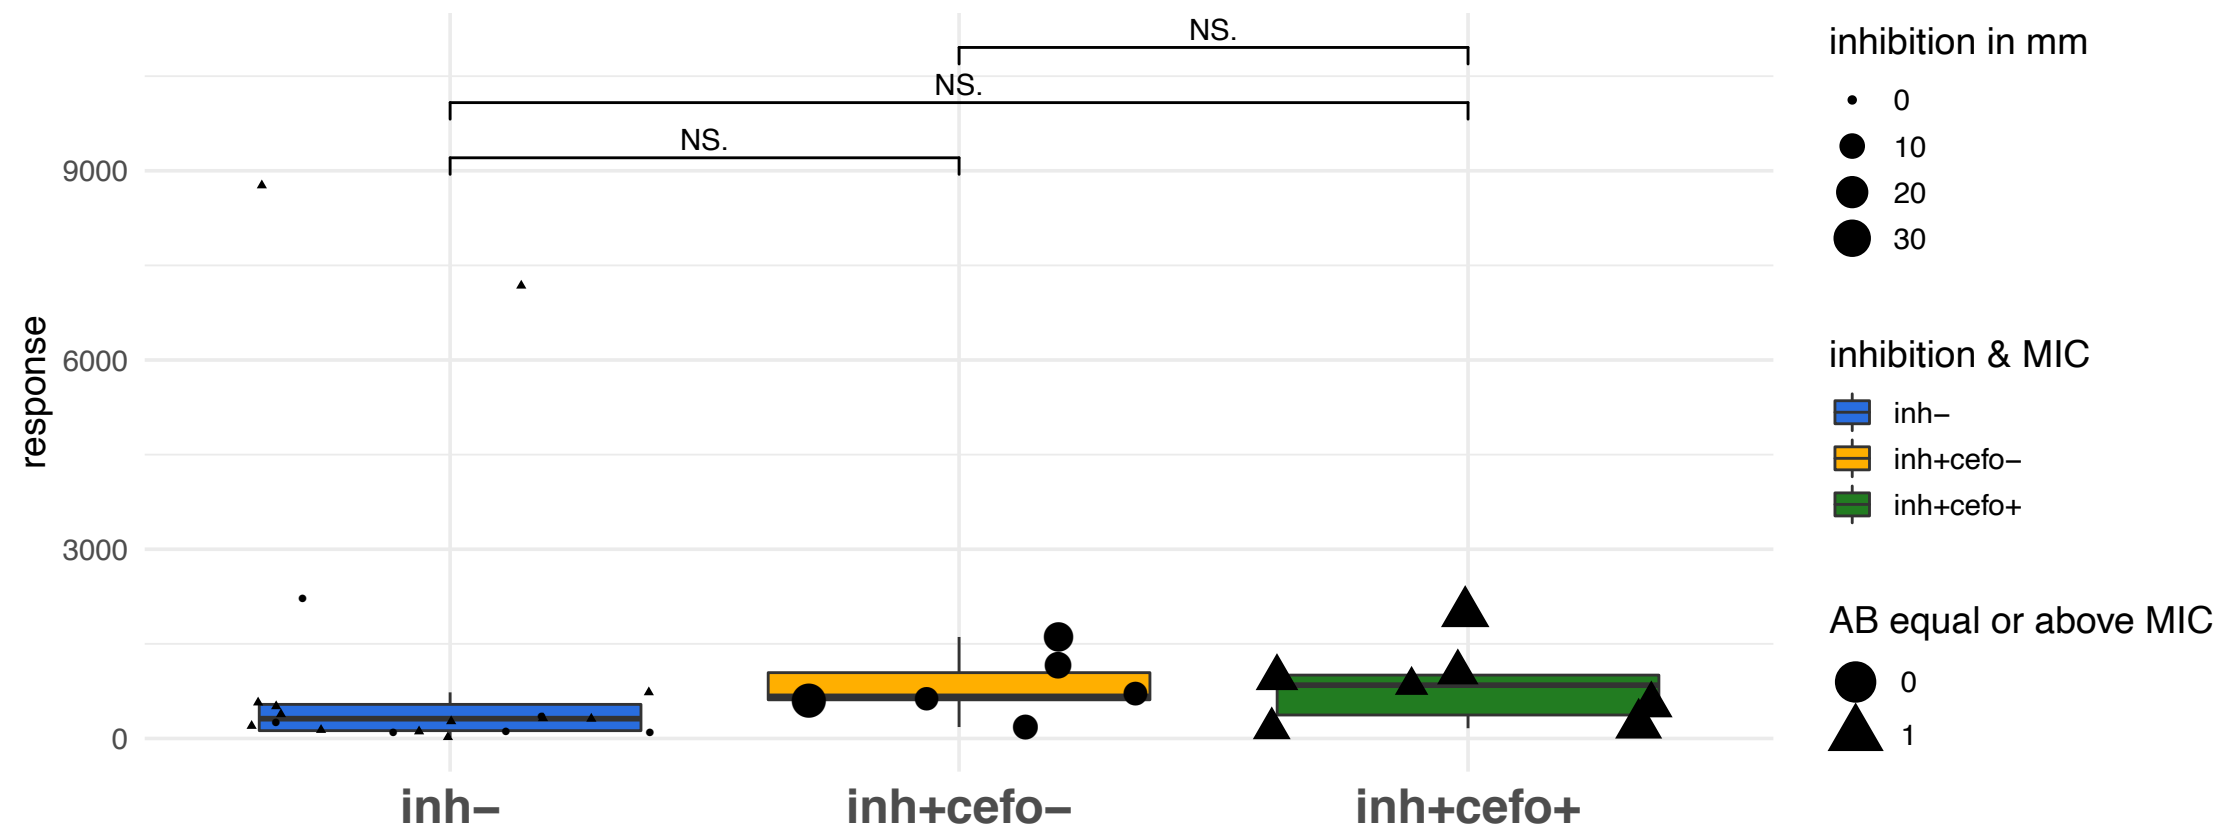

NS &gt;0.05, \* &lt;0.05, \*\* &lt;0.01, \*\*\* &lt;0.001

B

## PfbA

y-axis = log10-scale

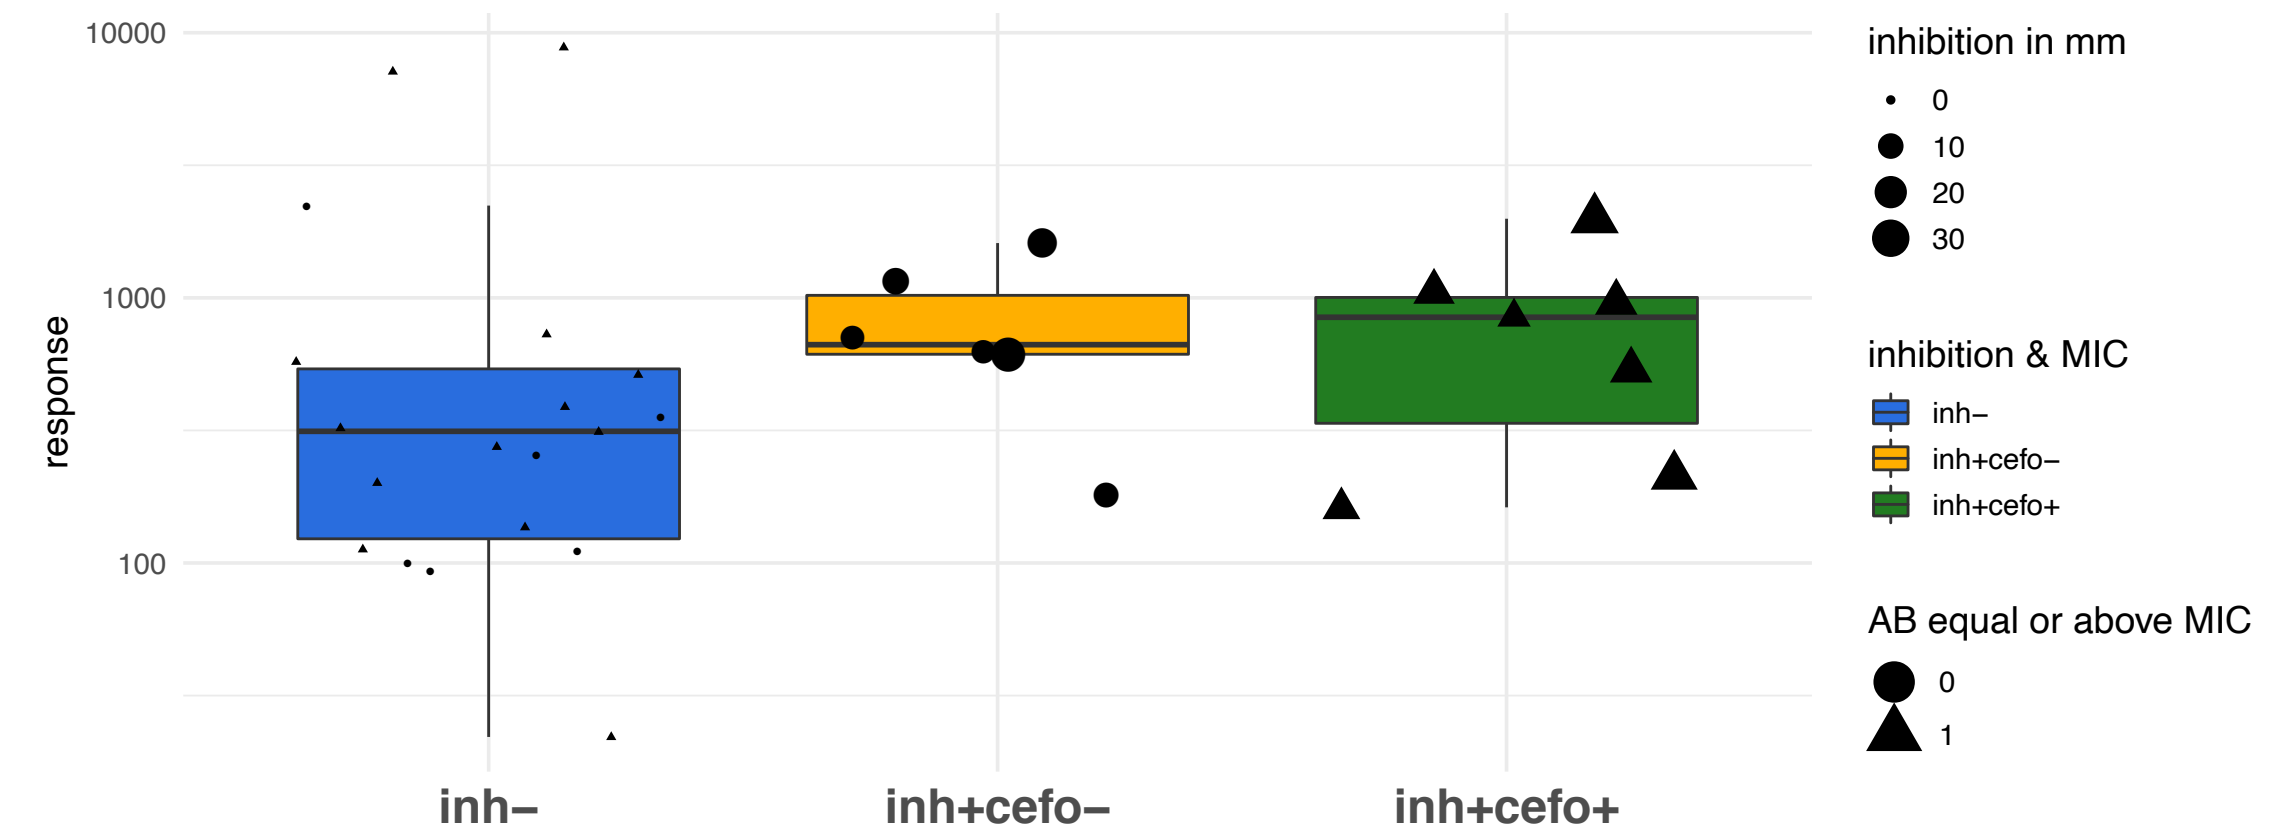

A

# PGK

unpaired wilcoxon test

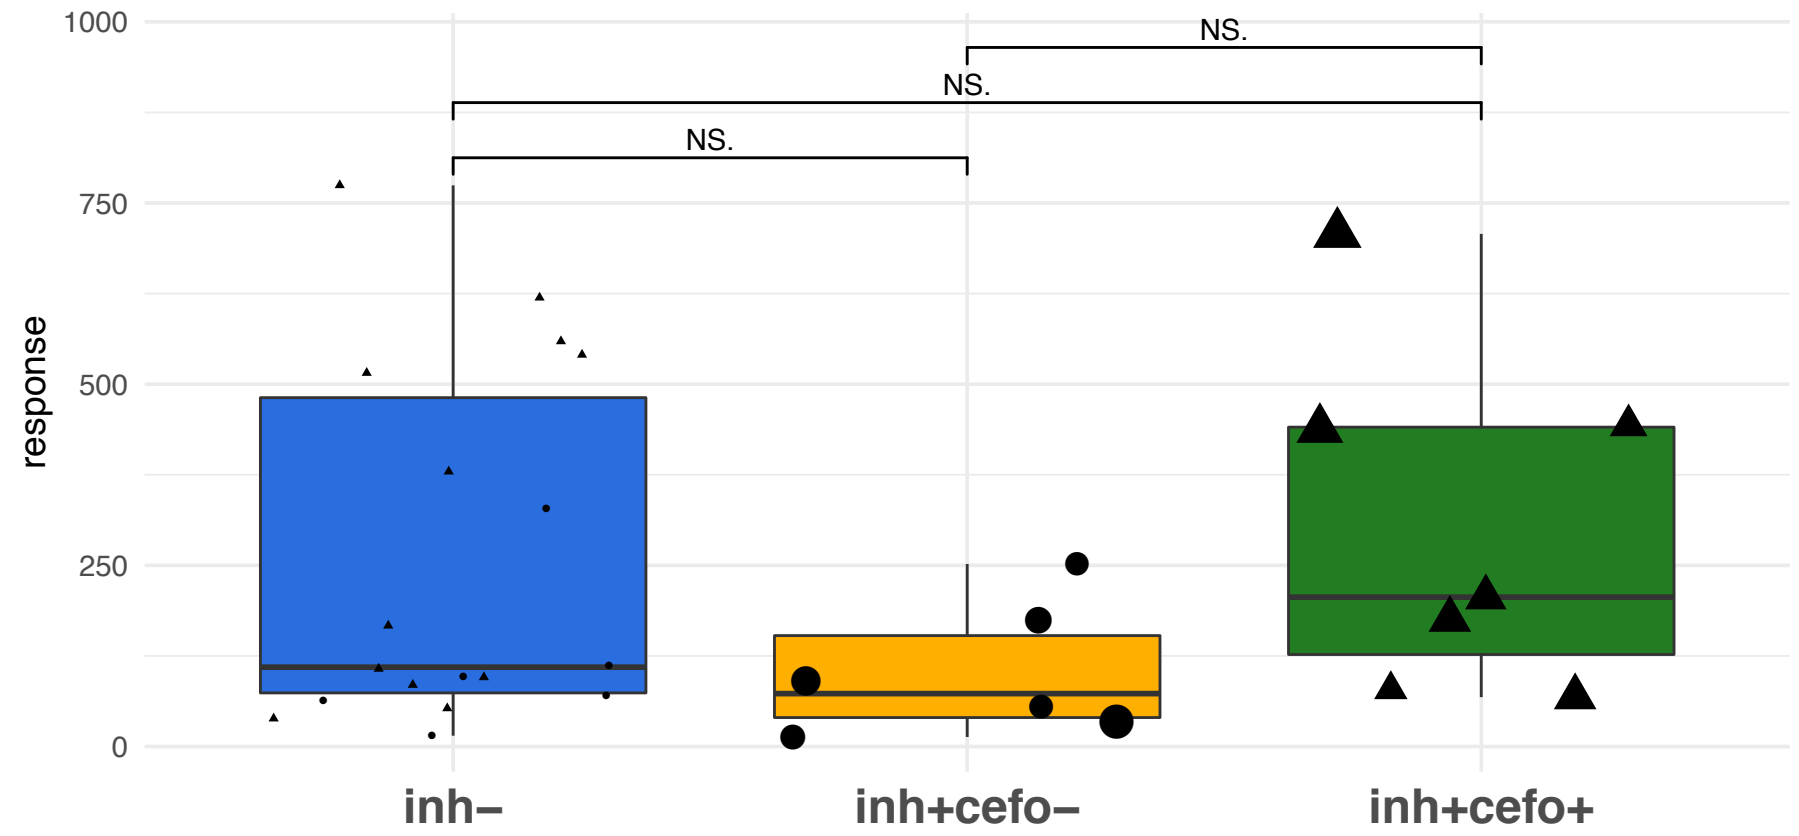

inhibition in mm

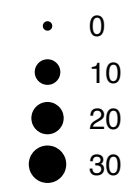

inhibition & MIC

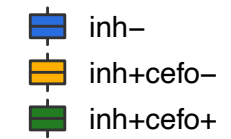

AB equal or above MIC

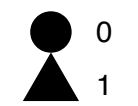

NS >0.05, \* <0.05, \*\* <0.01, \*\*\* <0.001

B

# PGK

y-axis = log<sub>10</sub>-scale

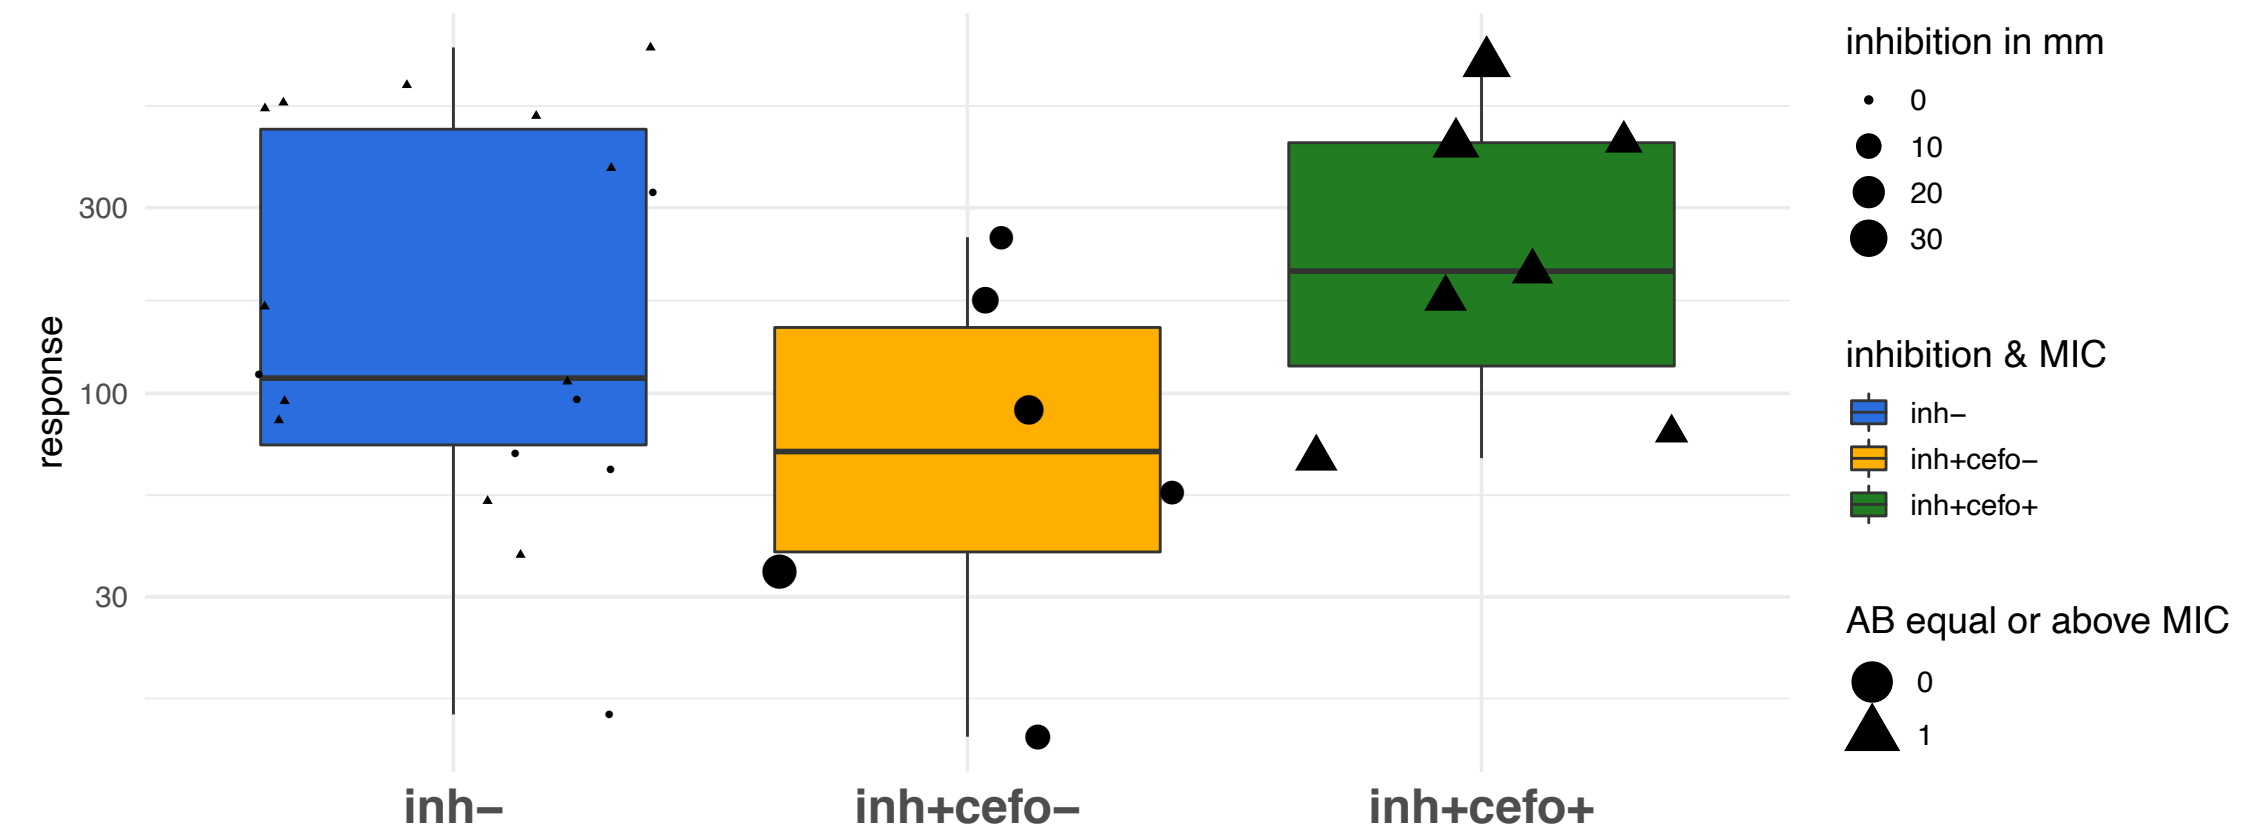

inhibition in mm



inhibition & MIC



AB equal or above MIC



A

# PhpP

unpaired wilcoxon test

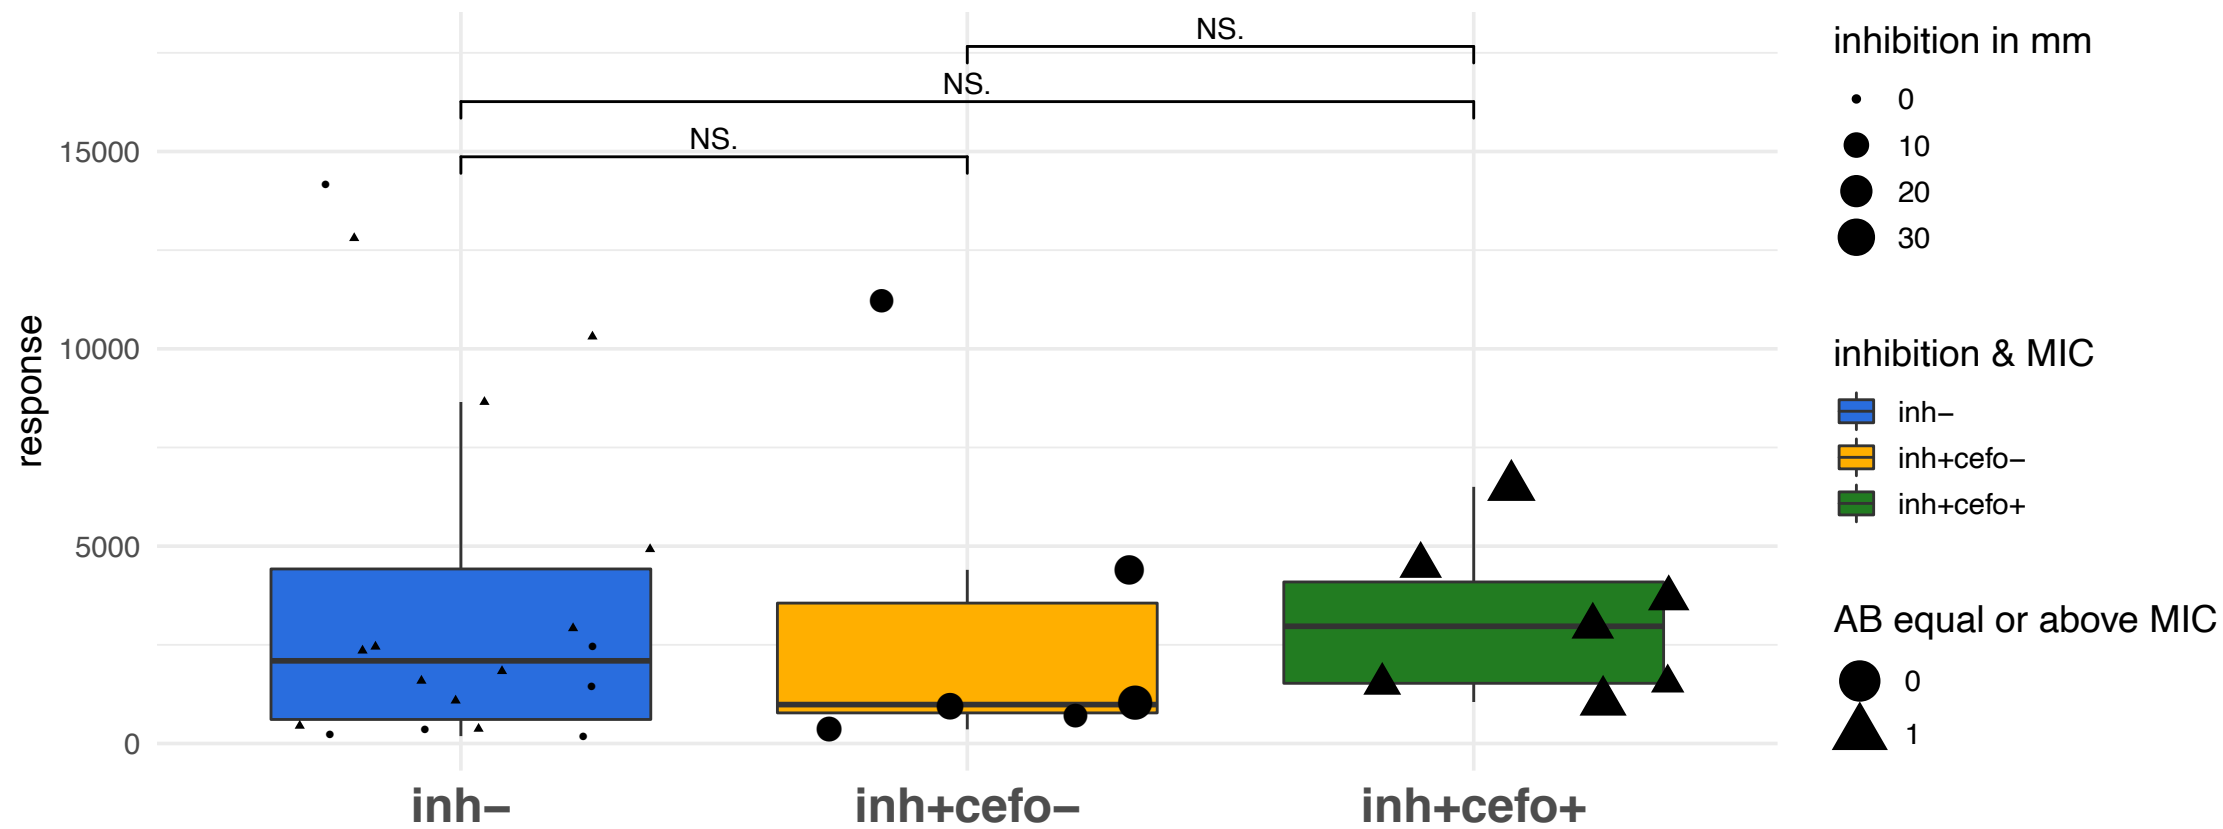

NS >0.05, \* <0.05, \*\* <0.01, \*\*\* <0.001

B

# PhpP

y-axis = log<sub>10</sub>-scale

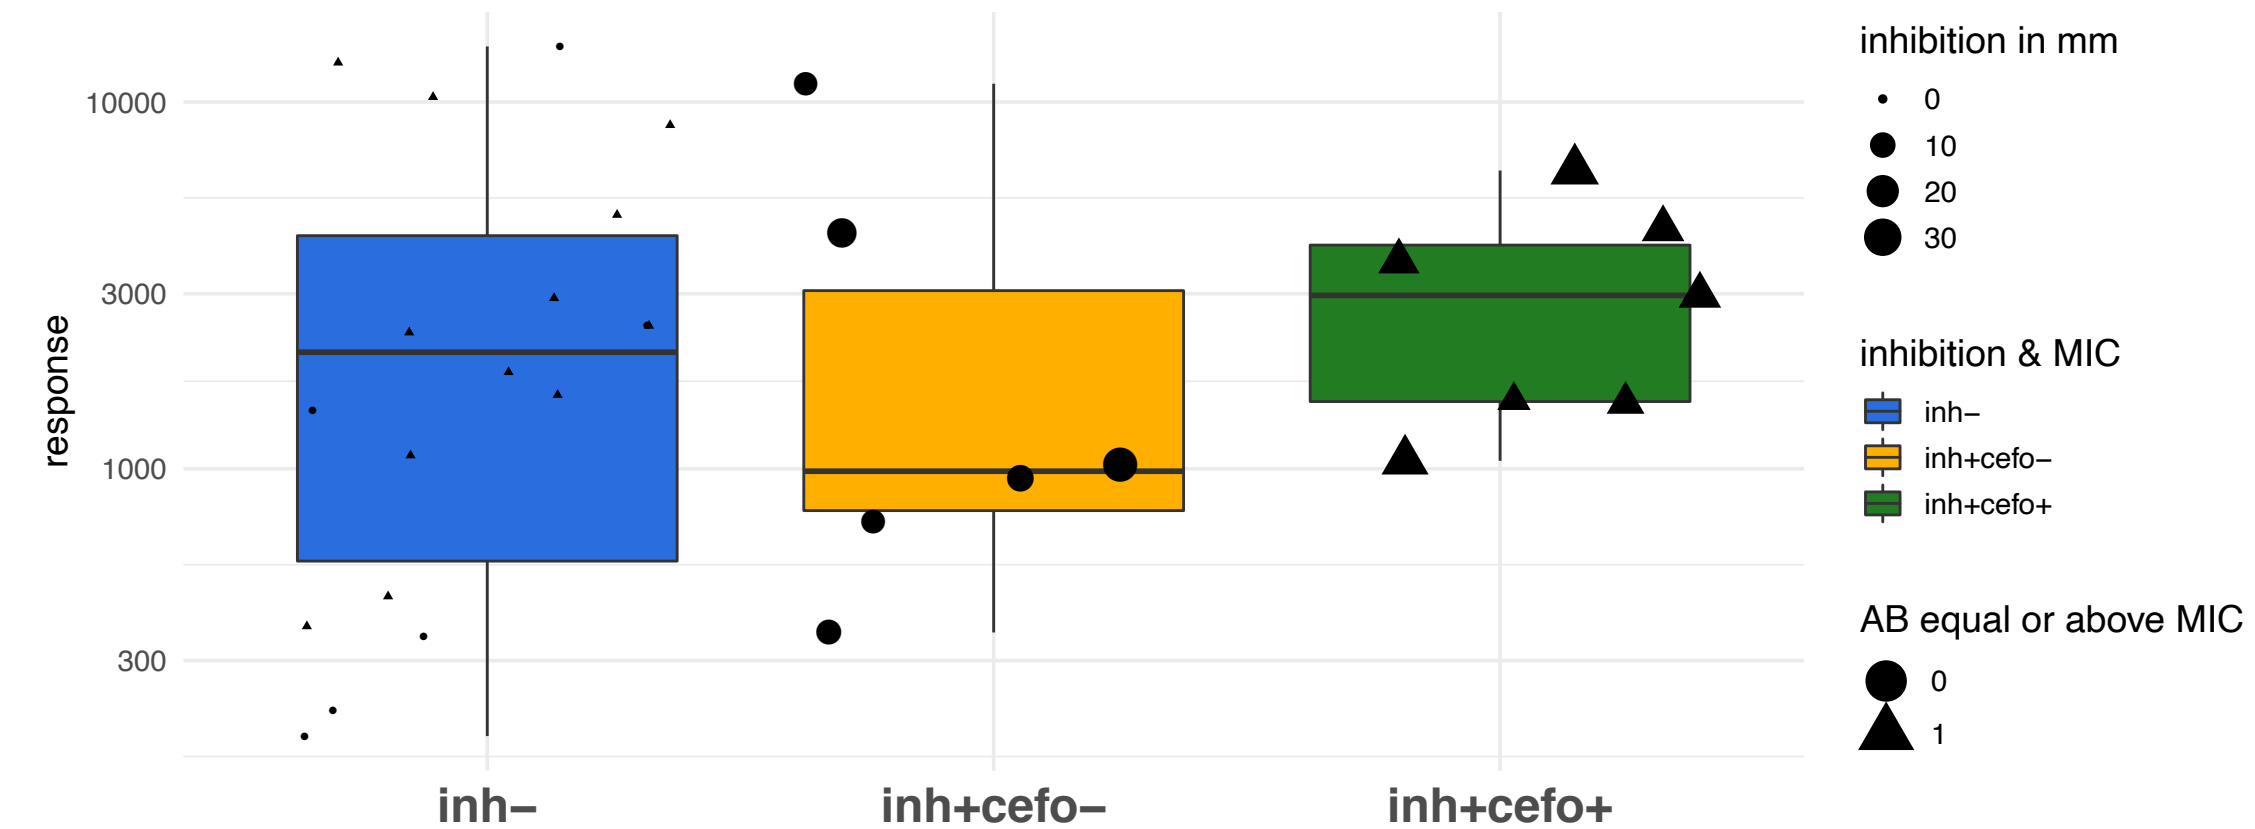



A

## PhtD

unpaired wilcoxon test

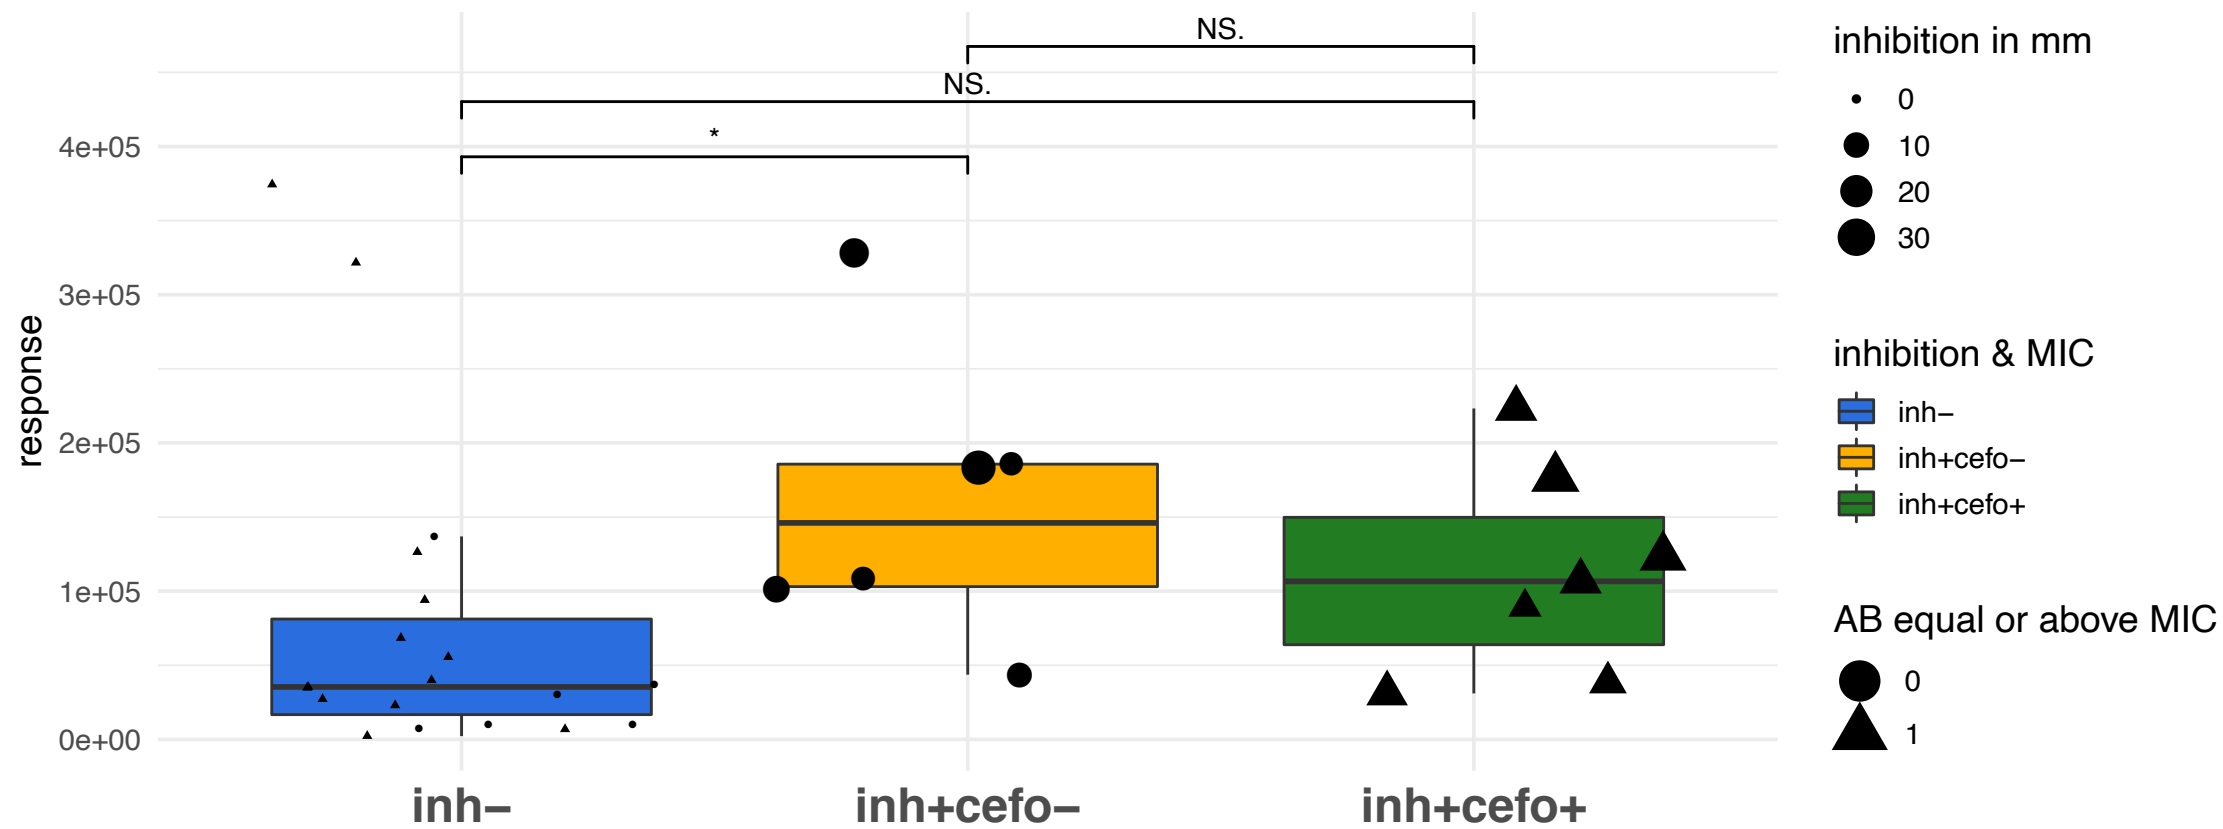

NS &gt;0.05, \* &lt;0.05, \*\* &lt;0.01, \*\*\* &lt;0.001

B

## PhtD

y-axis = log<sub>10</sub>-scale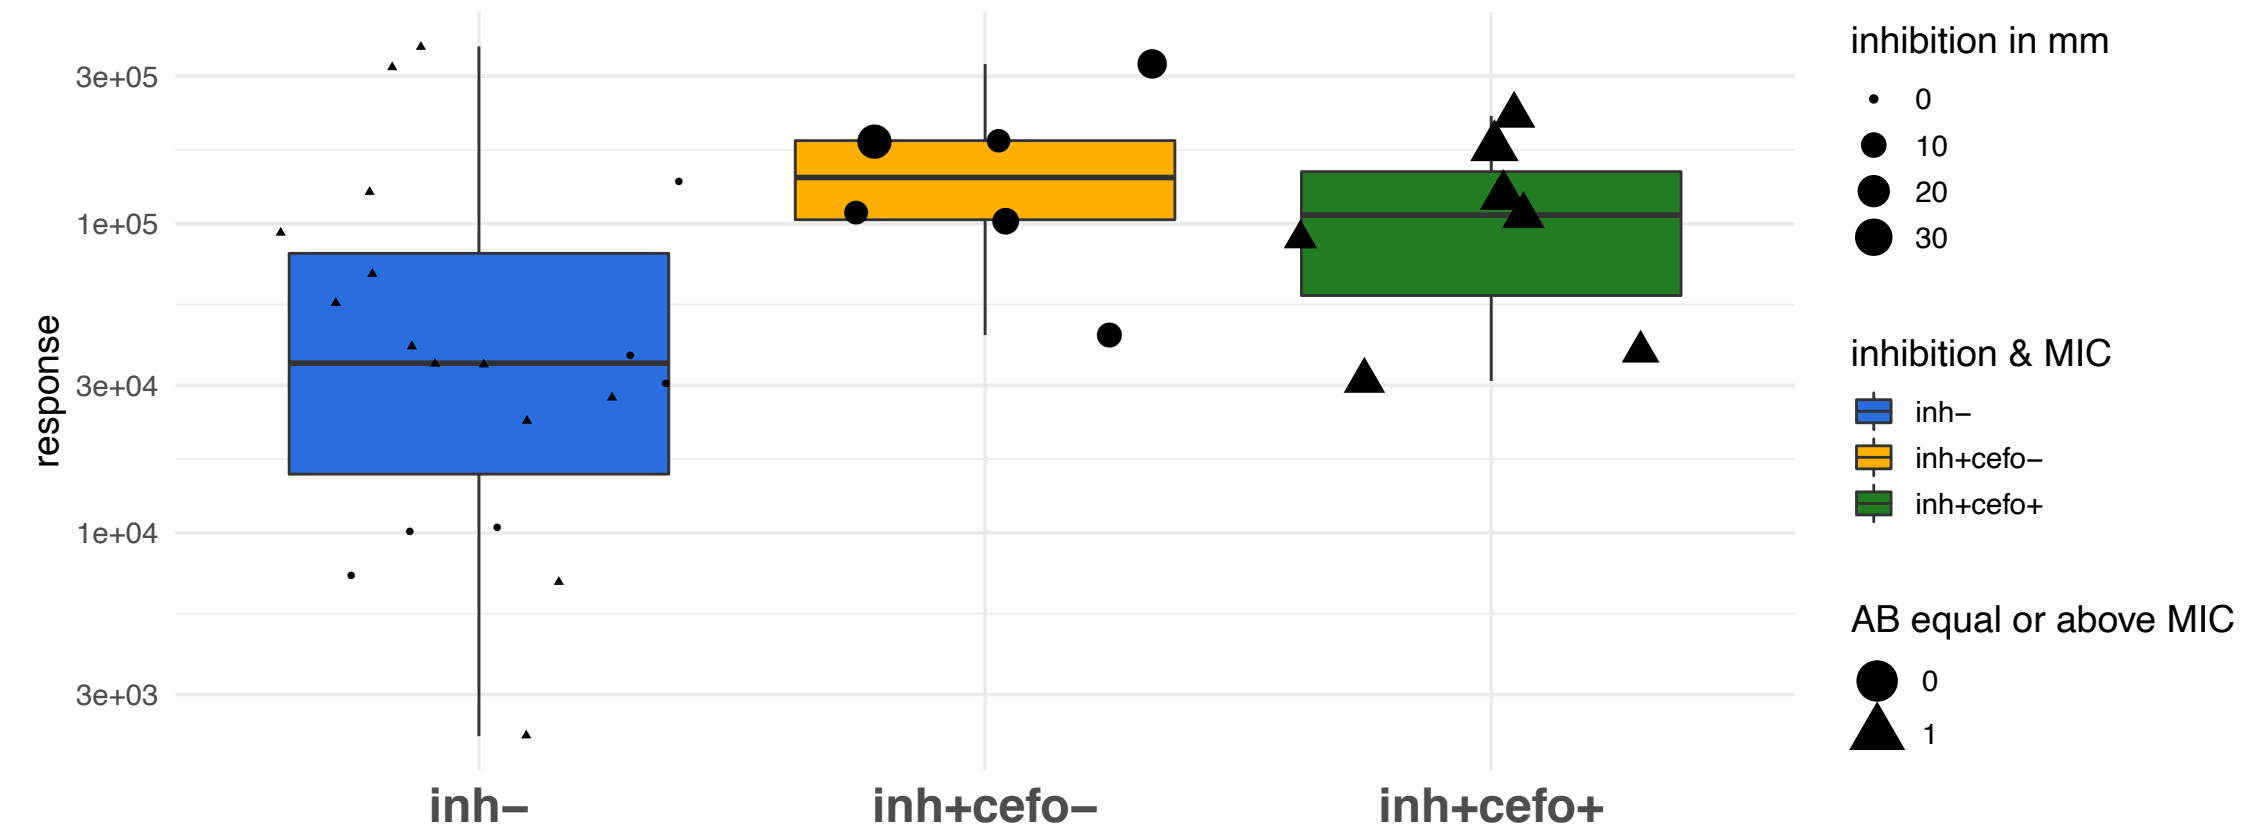

A

## PiaA

unpaired wilcoxon test

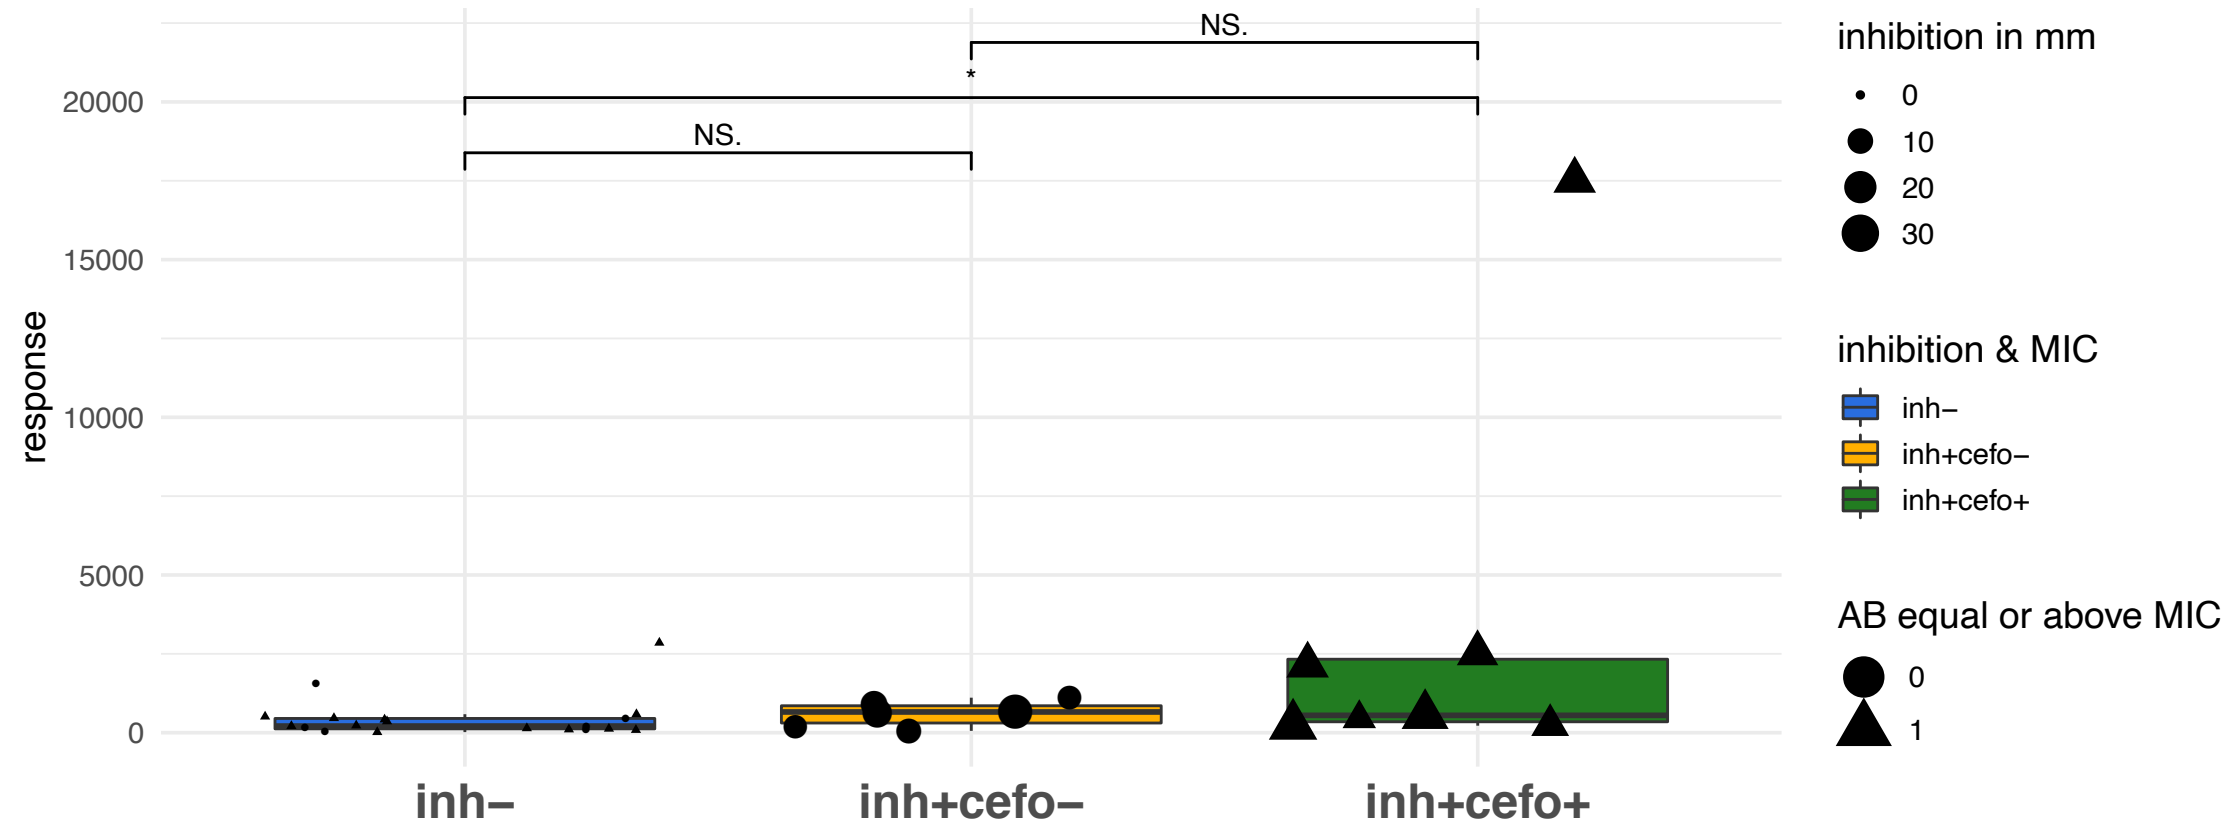

NS &gt;0.05, \* &lt;0.05, \*\* &lt; 0.01, \*\*\* &lt;0.001

B

## PiaA

y-axis = log10-scale

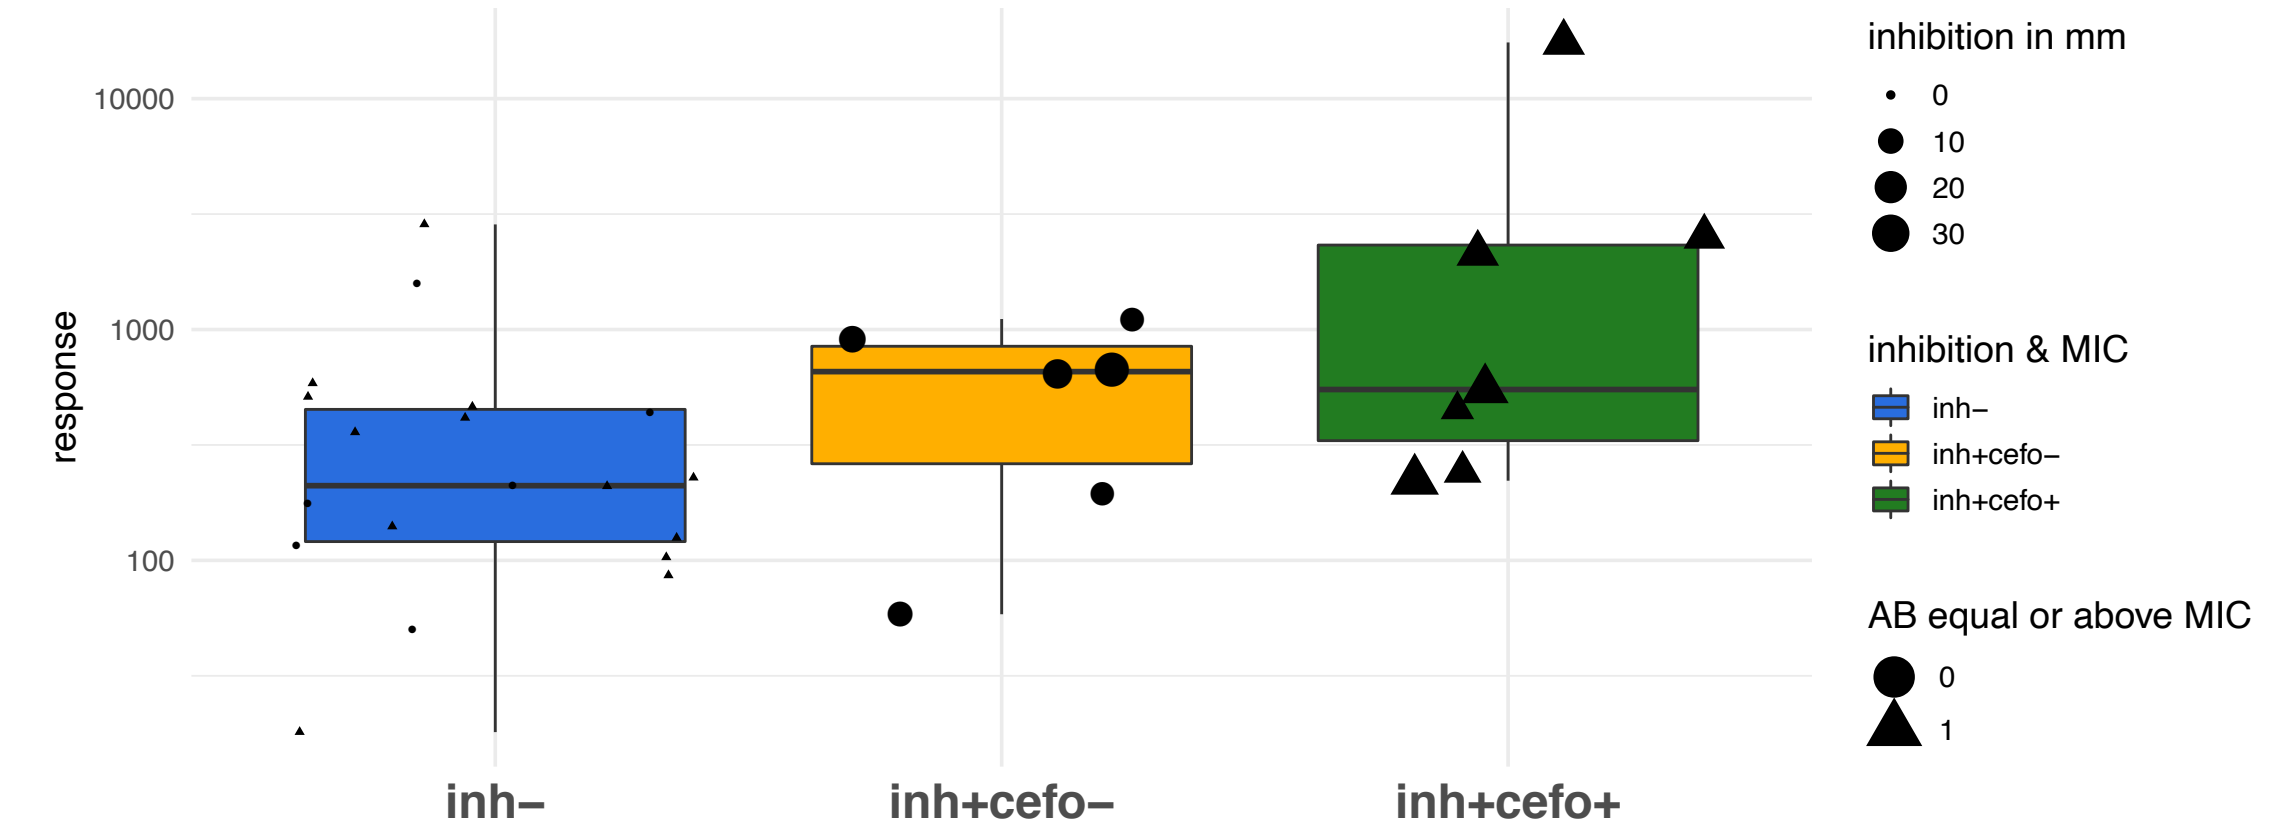

A

## PitB

unpaired wilcoxon test

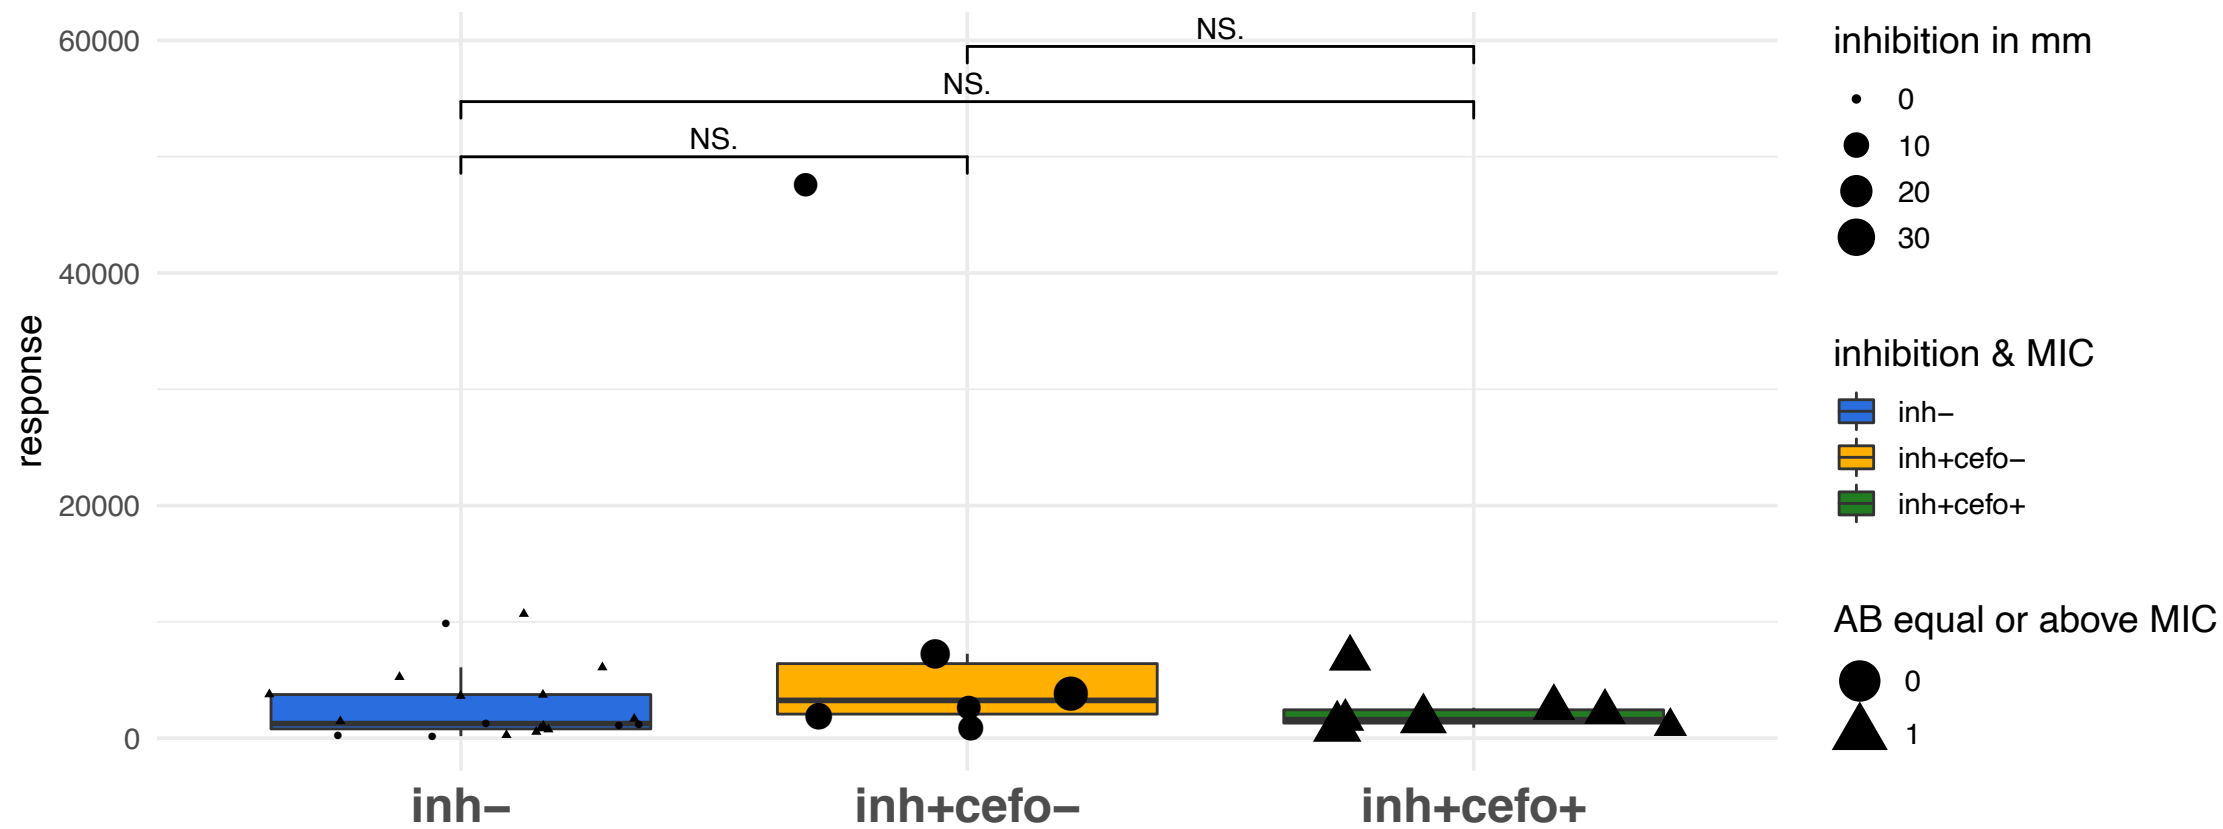

NS &gt;0.05, \* &lt;0.05, \*\* &lt;0.01, \*\*\* &lt;0.001

B

## PitB

y-axis = log<sub>10</sub>-scale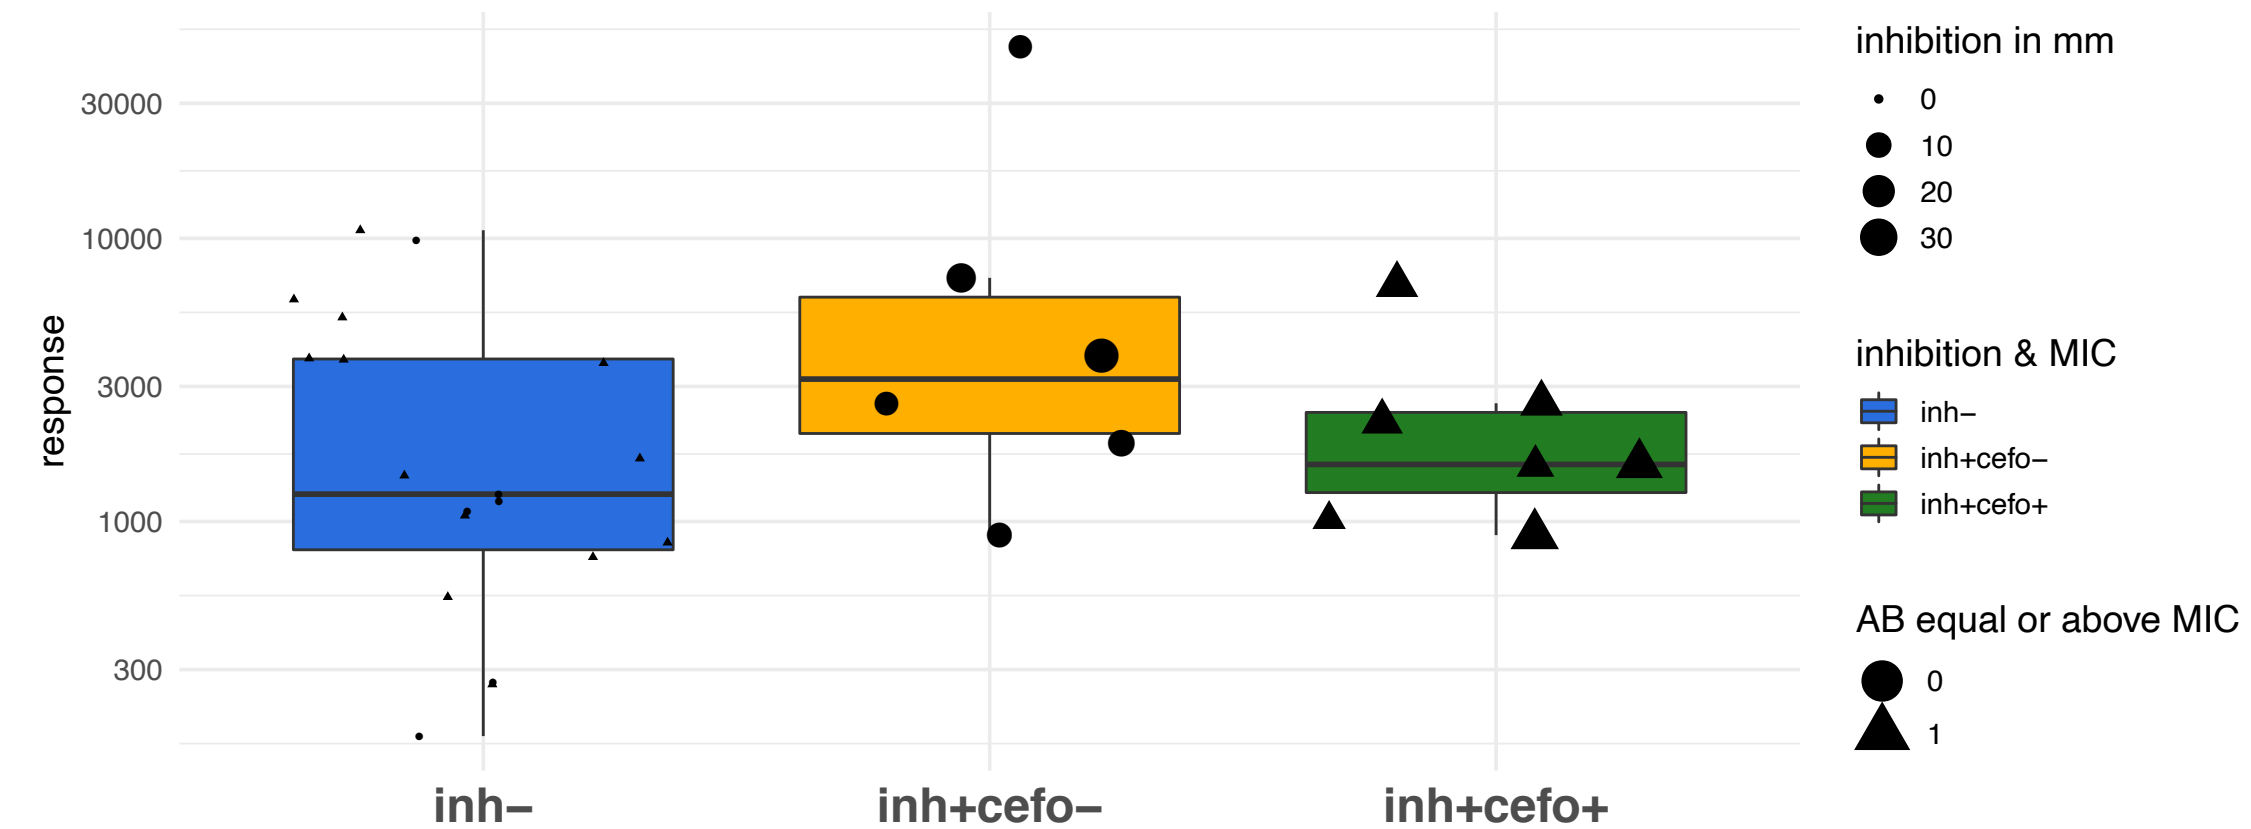

A

## Ply

unpaired wilcoxon test

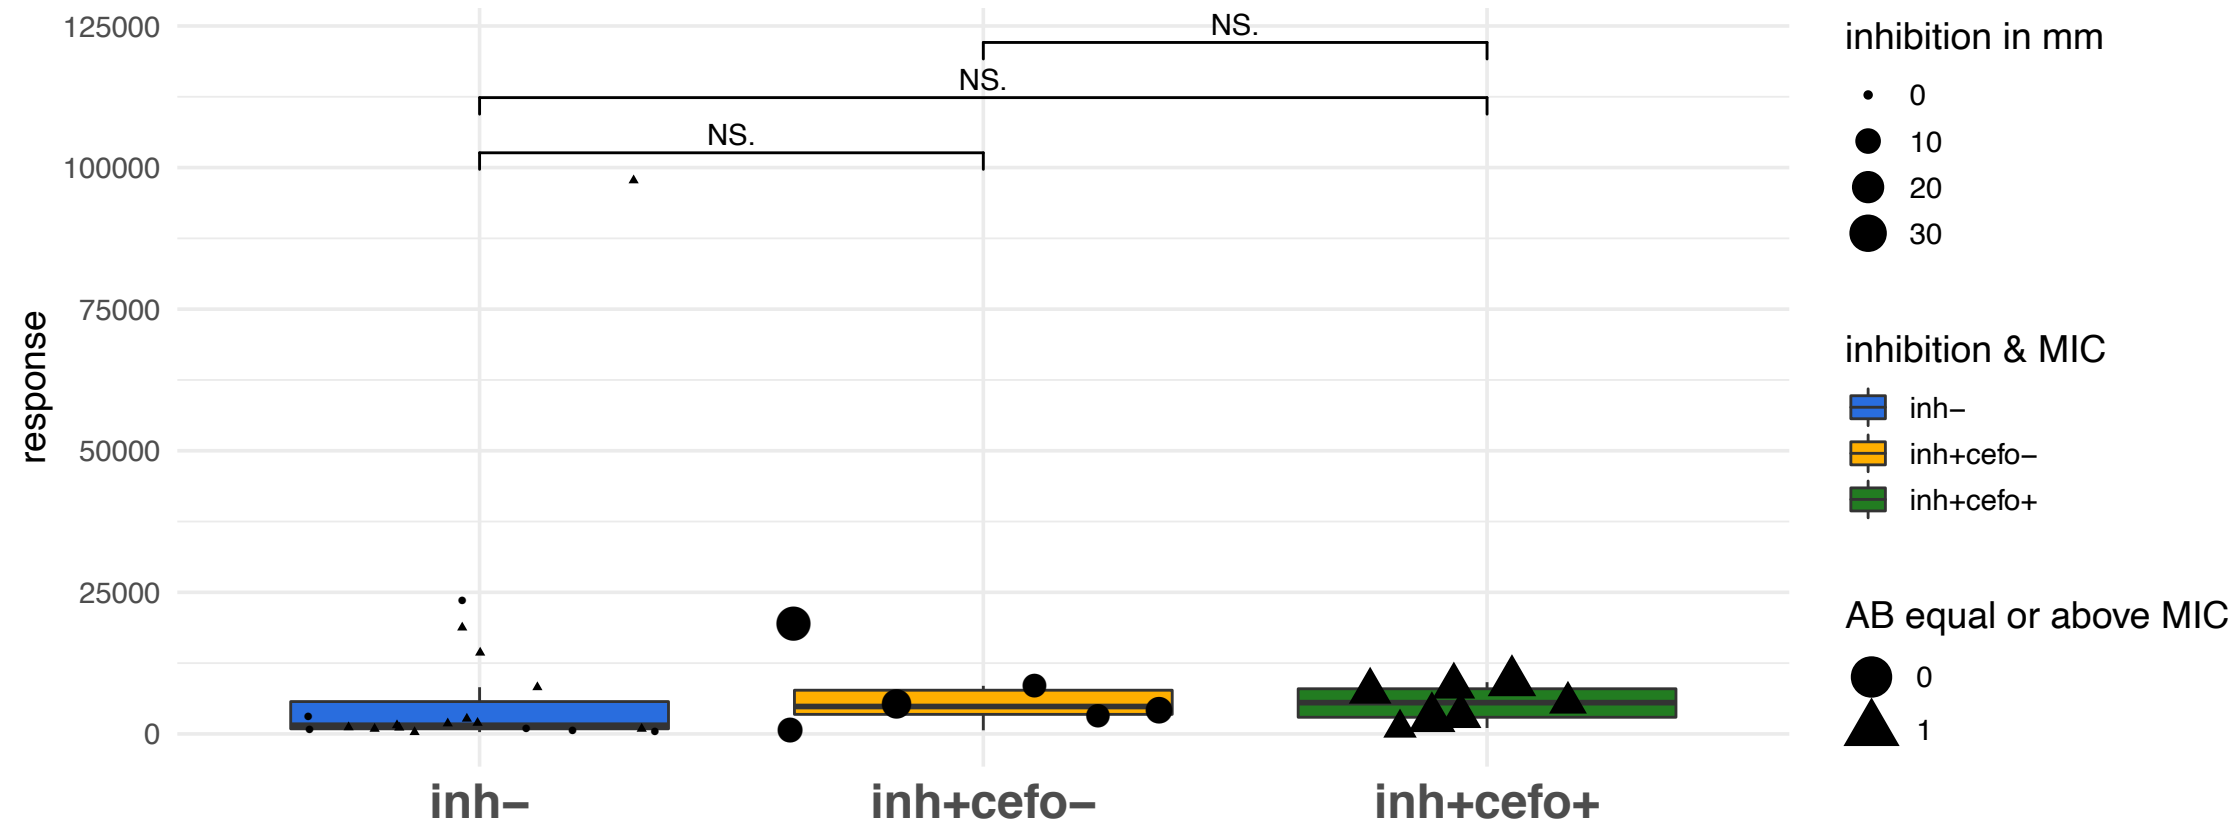

NS &gt;0.05, \* &lt;0.05, \*\* &lt;0.01, \*\*\* &lt;0.001

B

## Ply

y-axis = log<sub>10</sub>-scale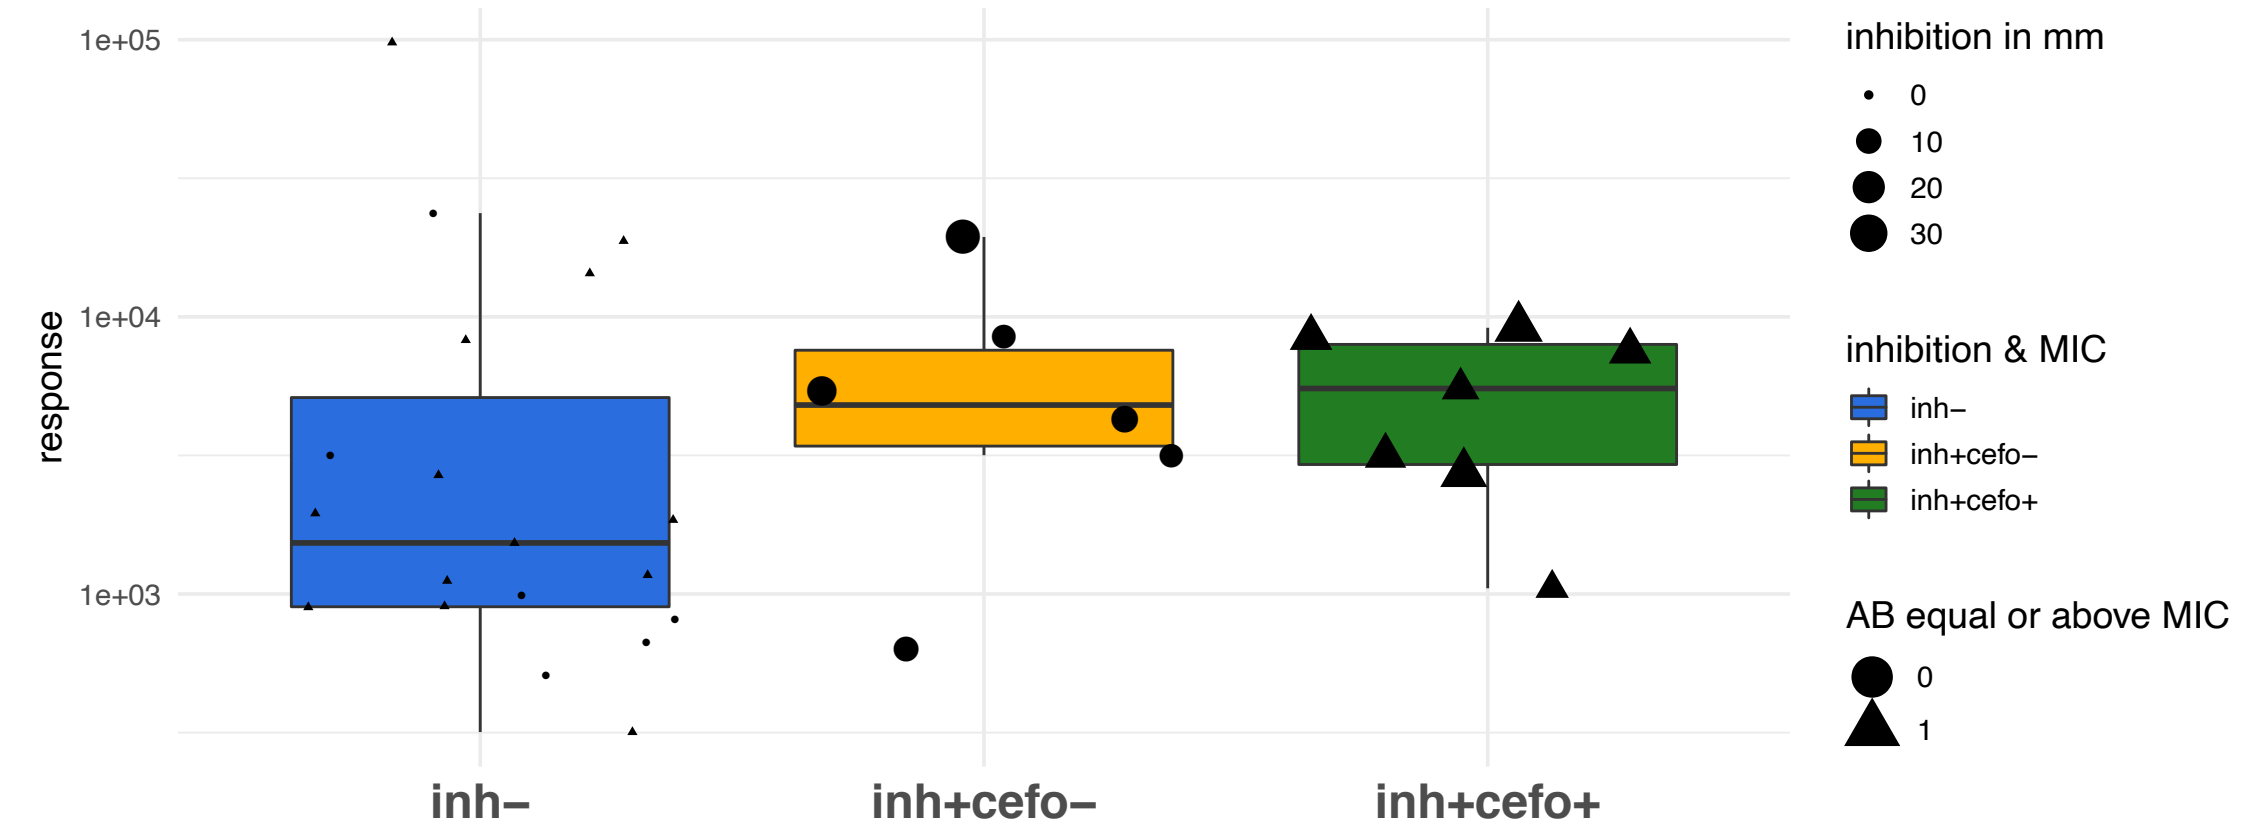

A

## PnrA

unpaired wilcoxon test

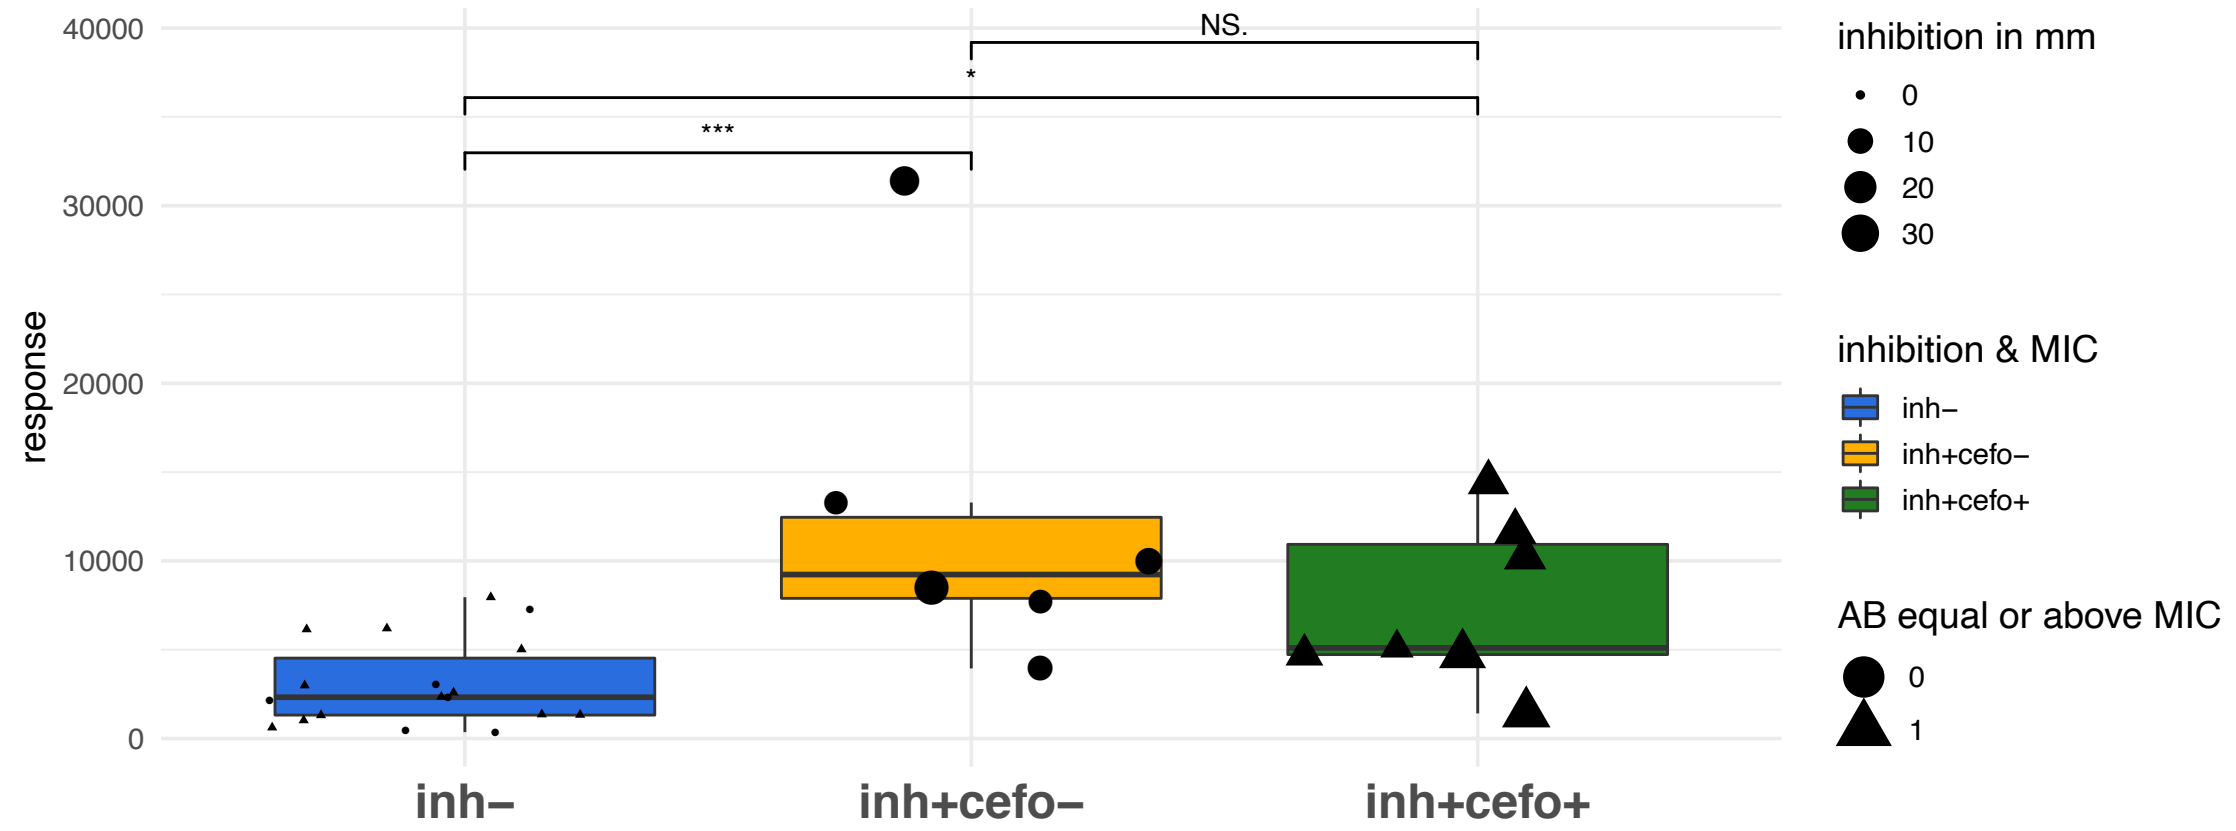

NS &gt;0.05, \* &lt;0.05, \*\* &lt;0.01, \*\*\* &lt;0.001

B

## PnrA

y-axis = log<sub>10</sub>-scale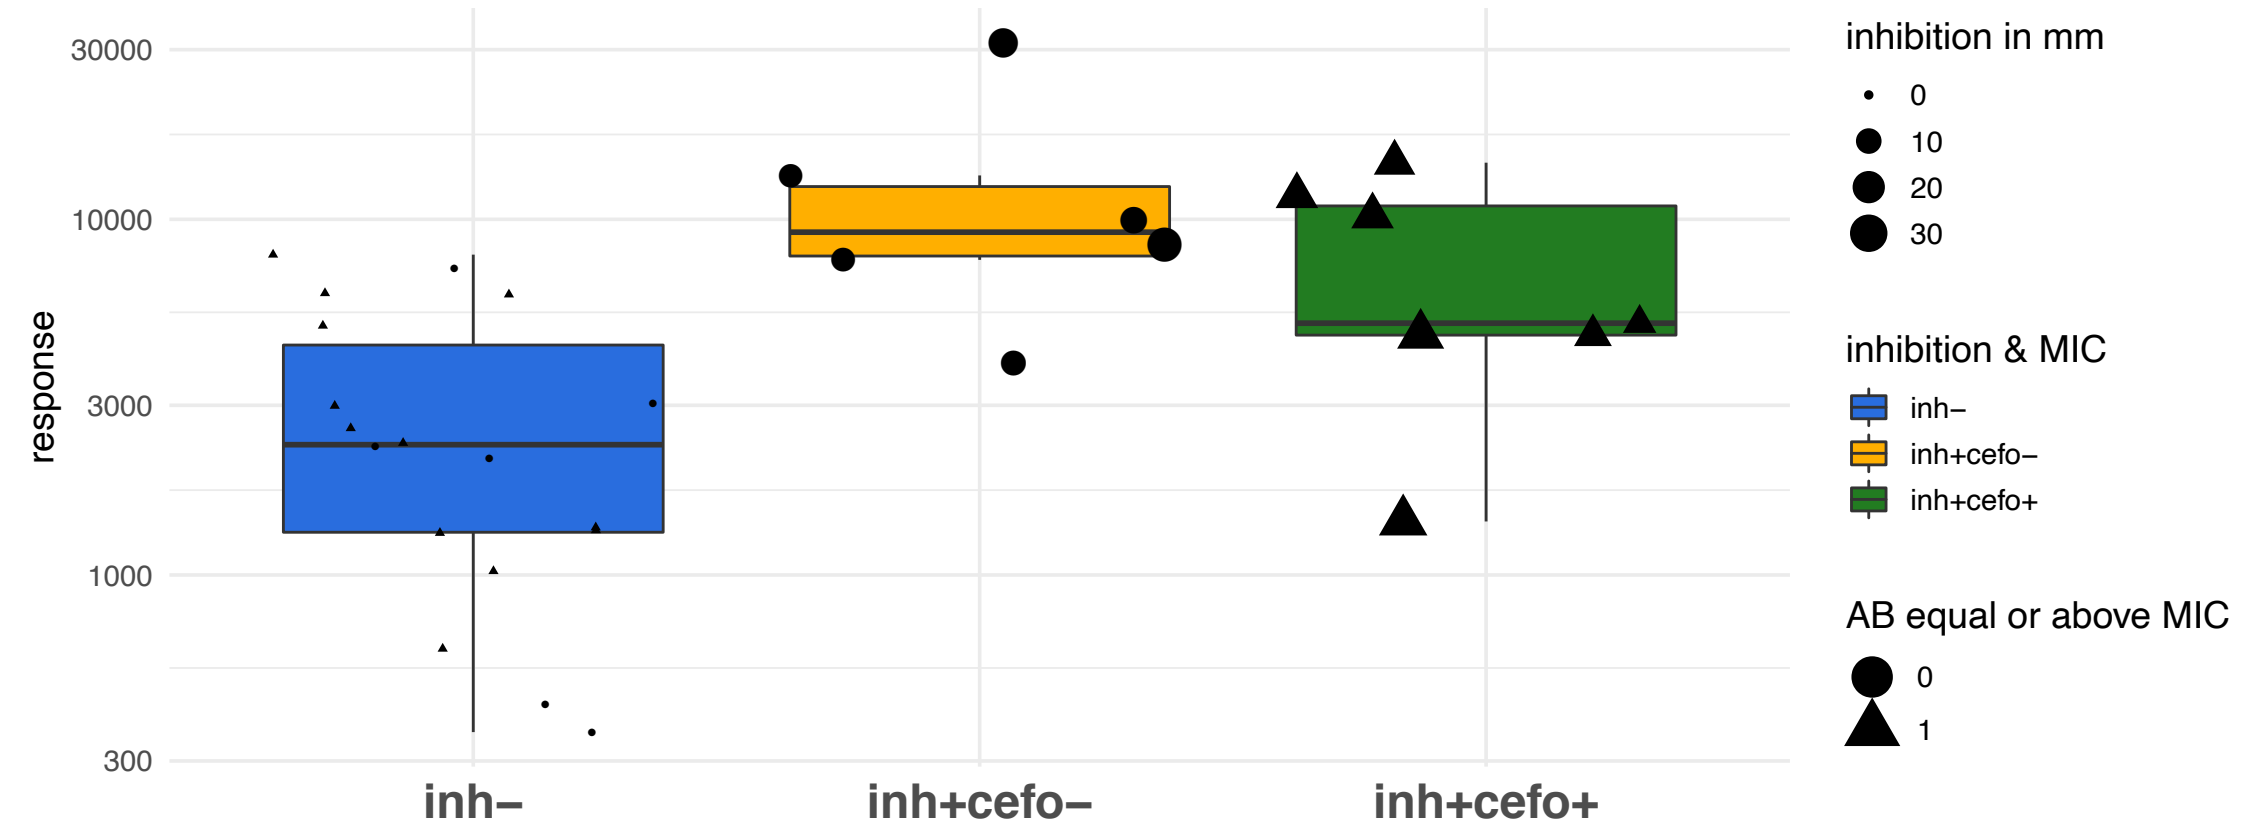

A

## PpmA

unpaired wilcoxon test

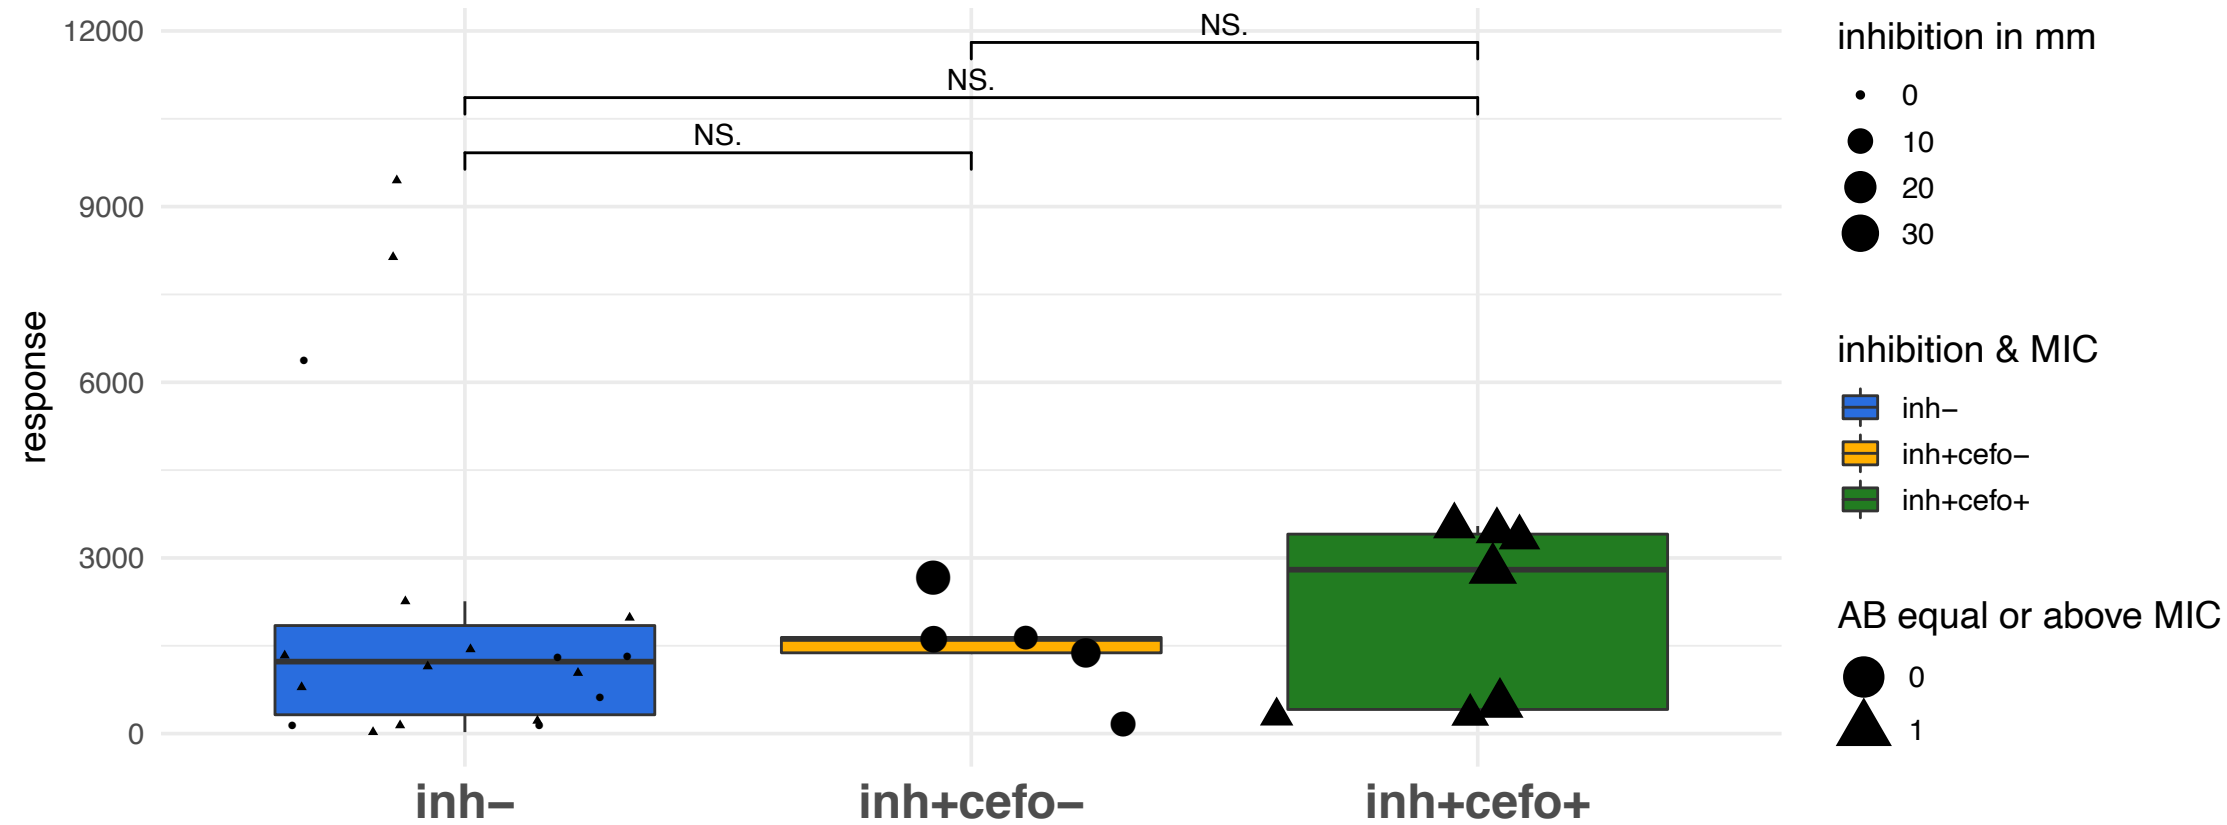

NS &gt;0.05, \* &lt;0.05, \*\* &lt;0.01, \*\*\* &lt;0.001

B

## PpmA

y-axis = log<sub>10</sub>-scale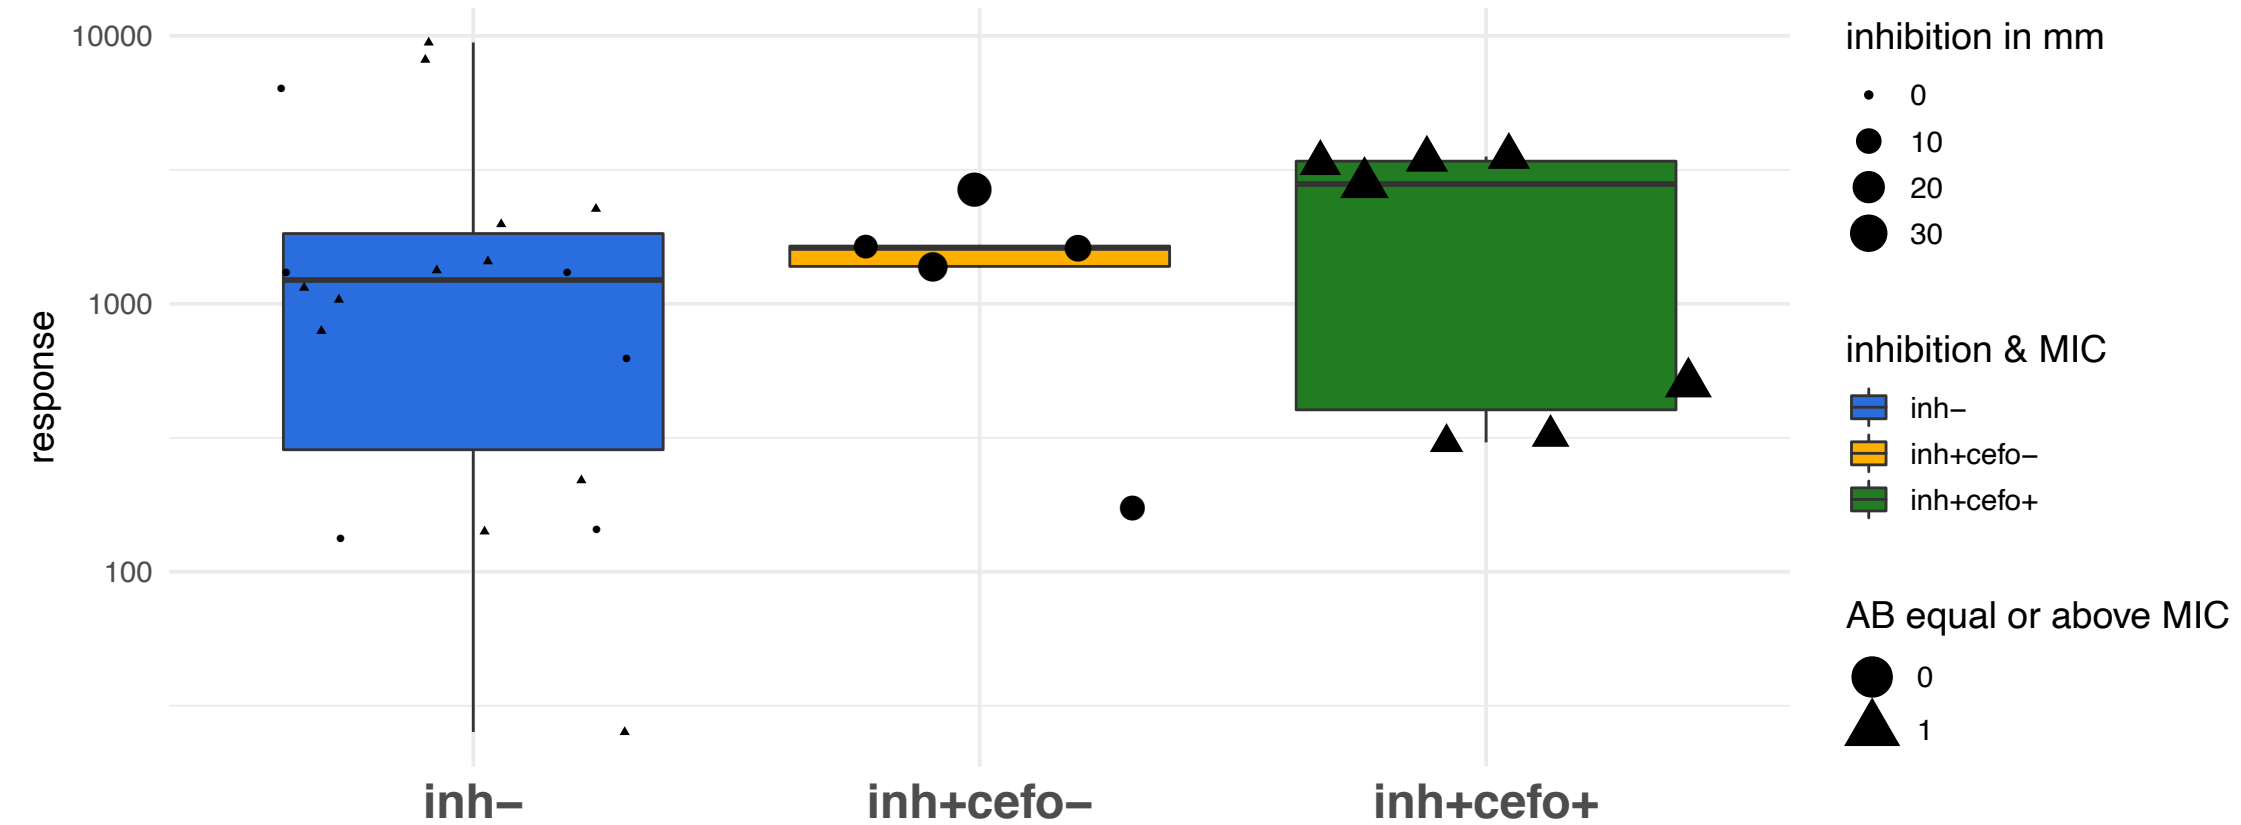

A

## PrtA2

unpaired wilcoxon test

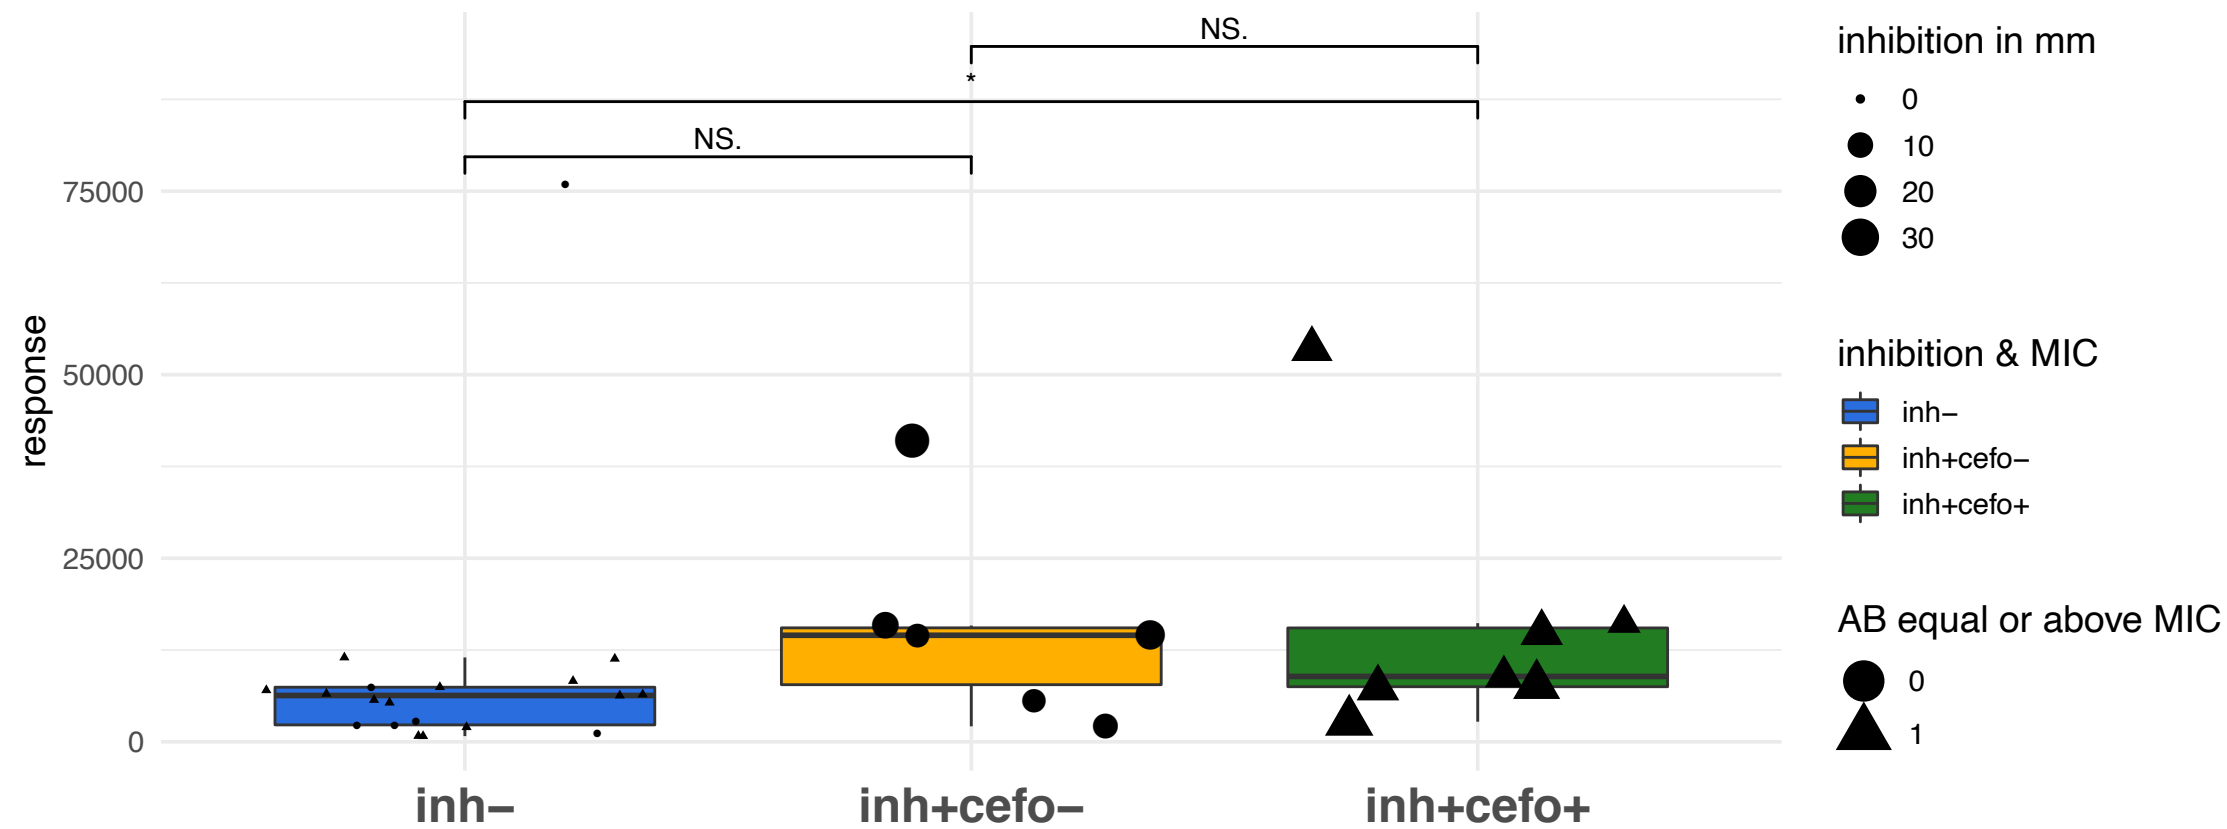

NS &gt;0.05, \* &lt;0.05, \*\* &lt;0.01, \*\*\* &lt;0.001

B

## PrtA2

y-axis = log<sub>10</sub>-scale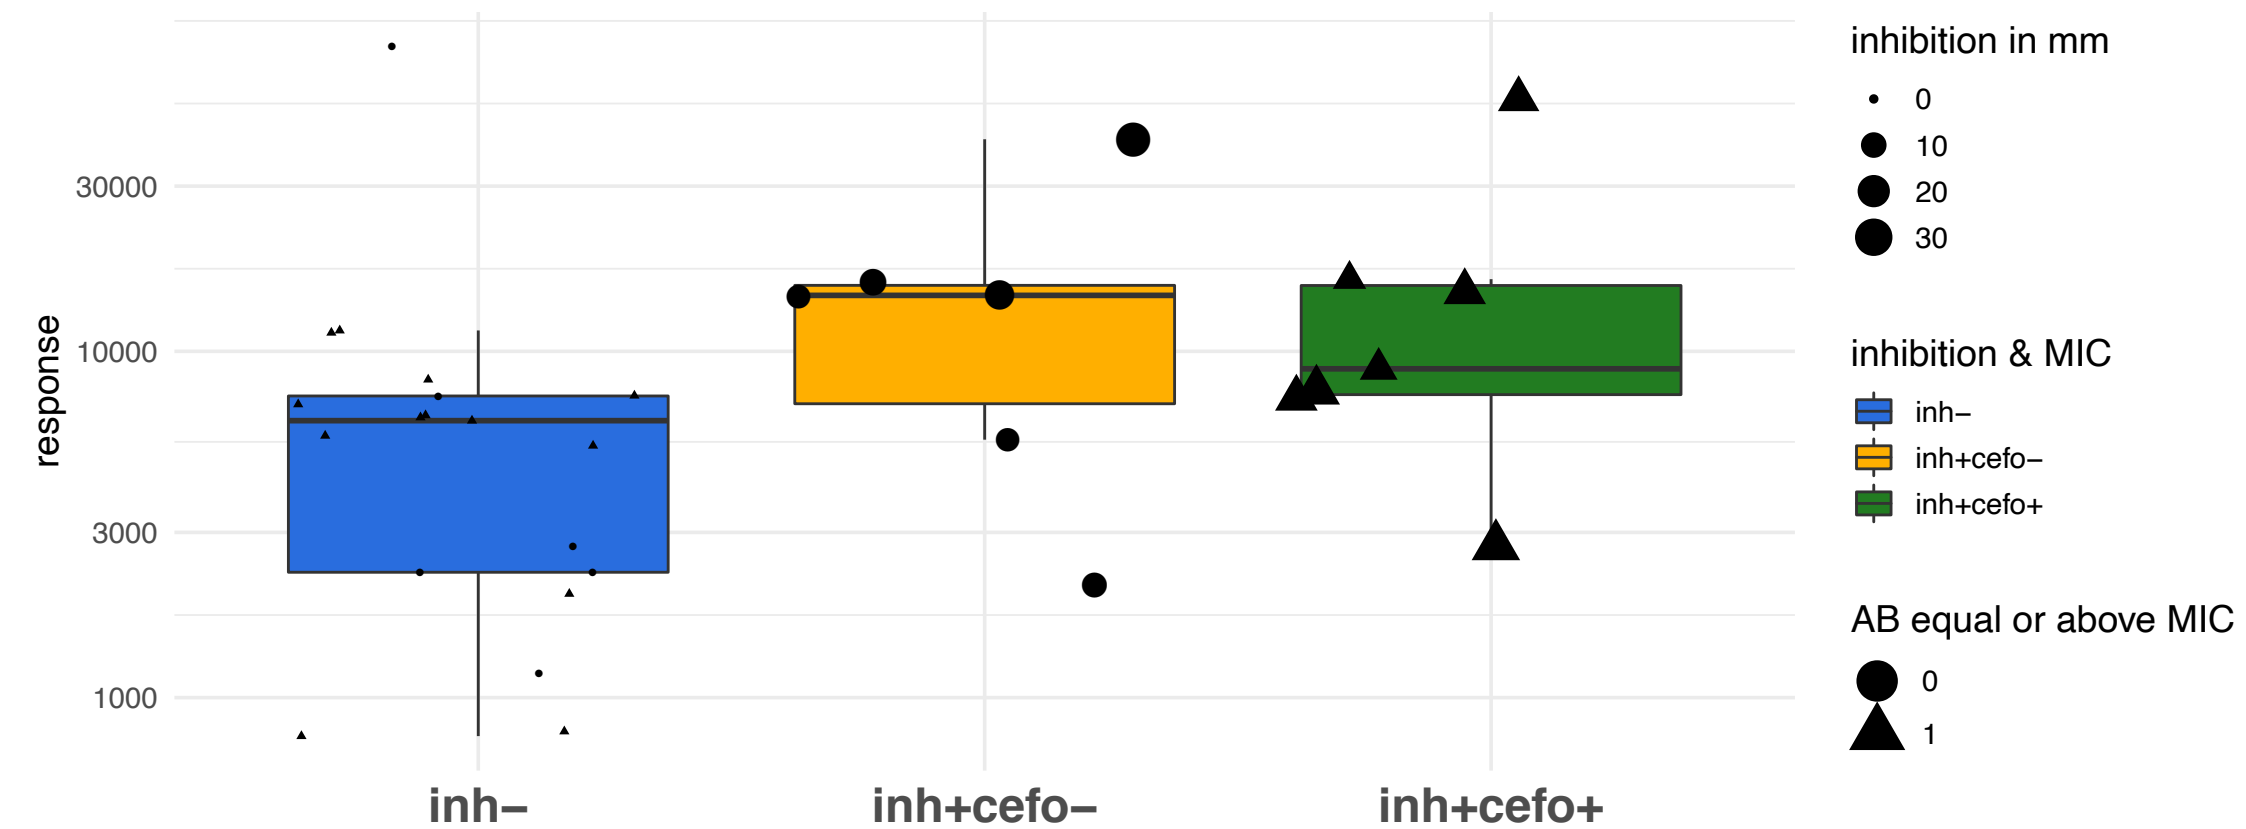

A

## PsaA

unpaired wilcoxon test

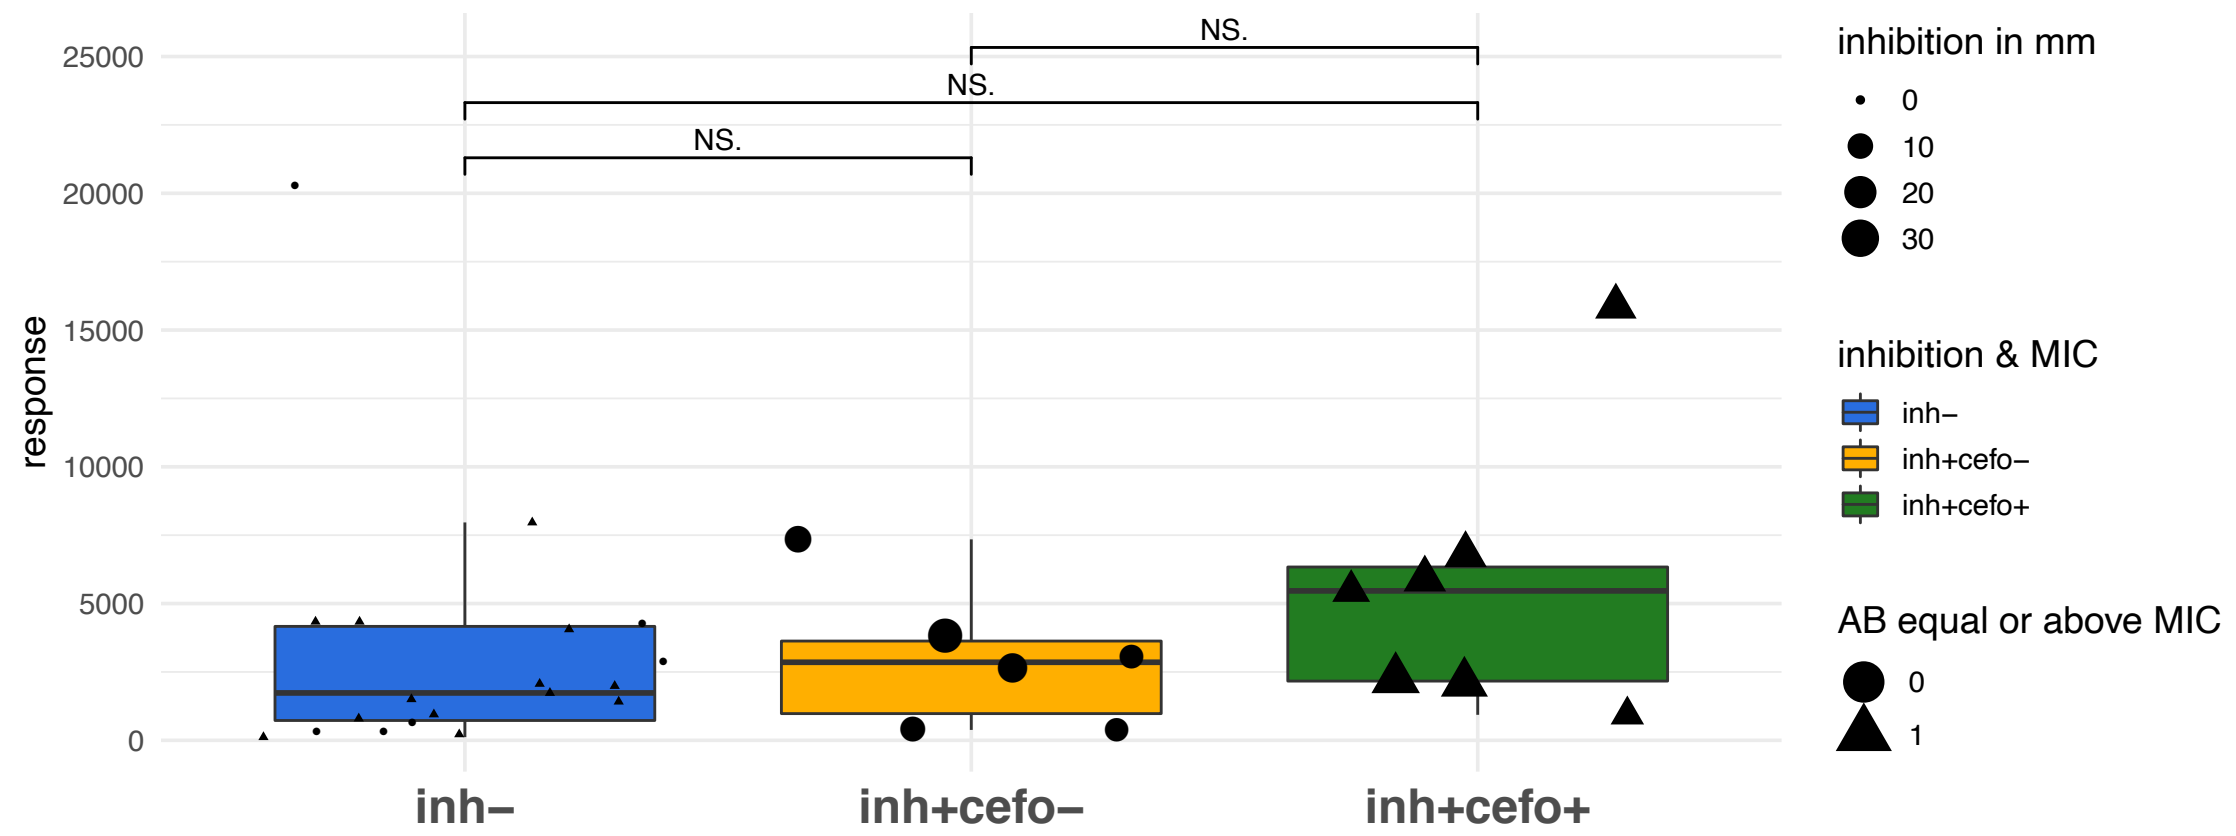

NS &gt;0.05, \* &lt;0.05, \*\* &lt;0.01, \*\*\* &lt;0.001

B

## PsaA

y-axis = log<sub>10</sub>-scale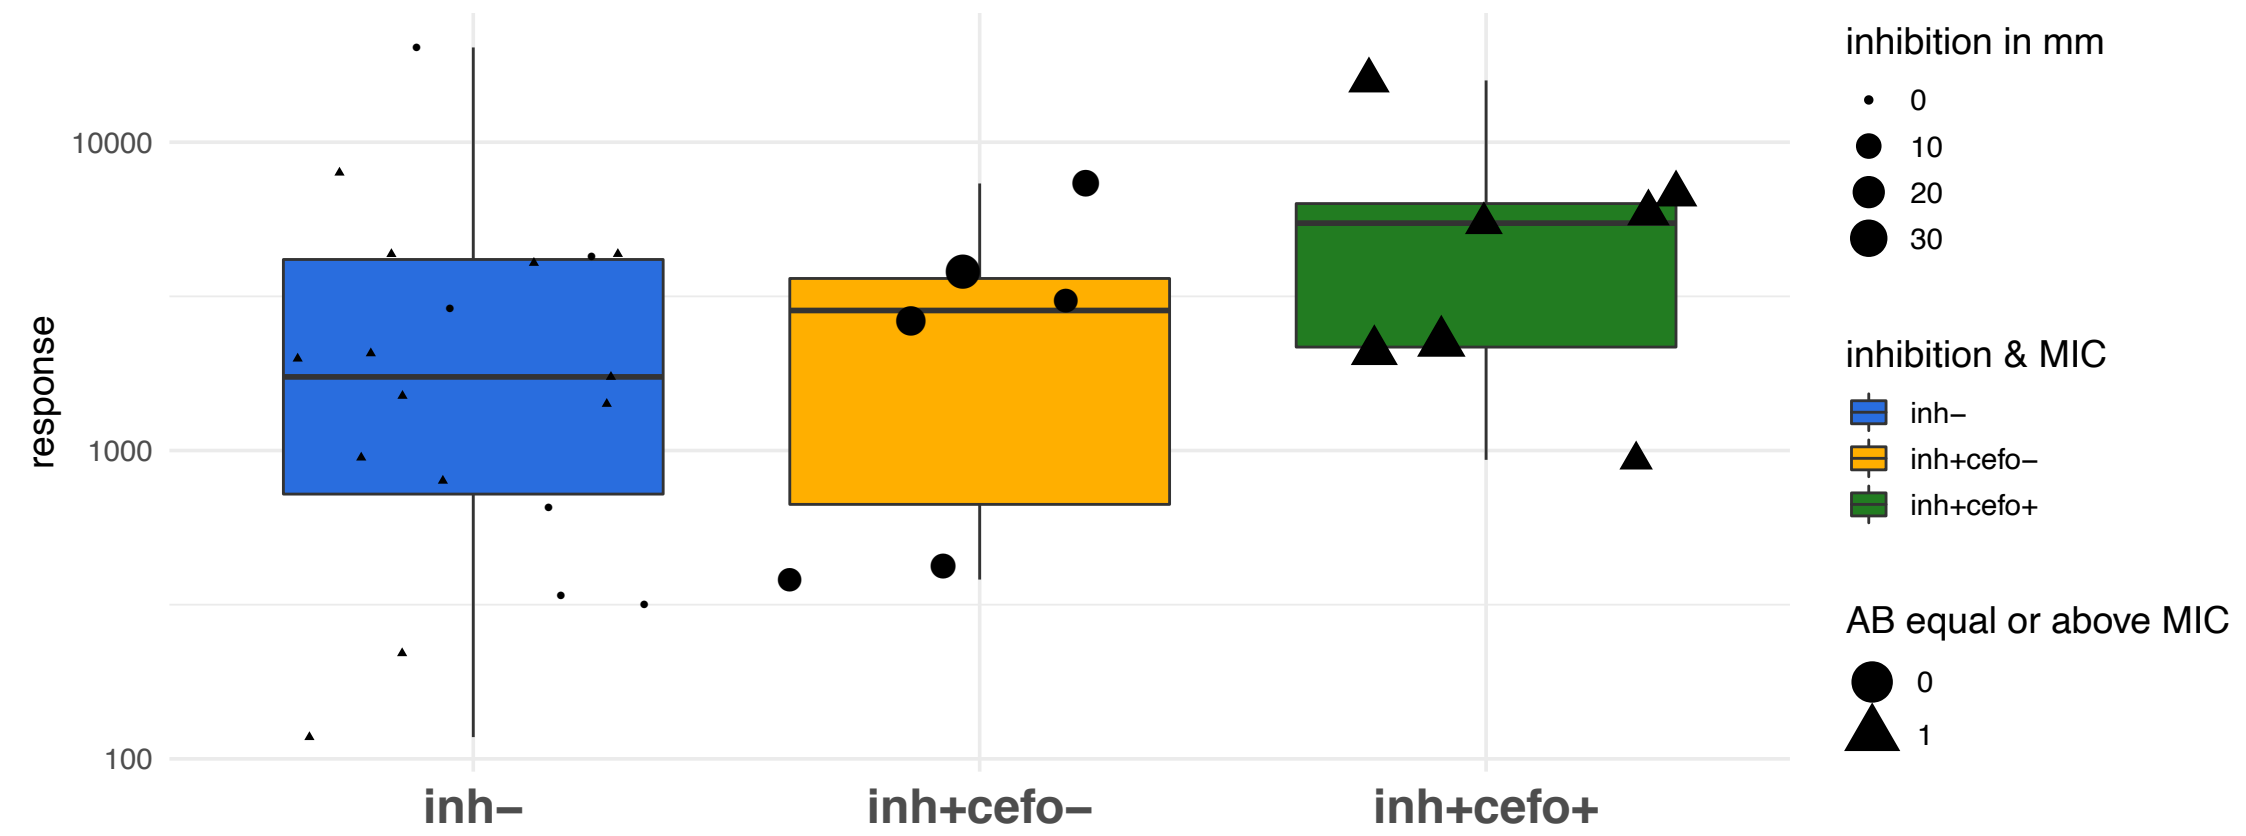



A

## PspA

unpaired wilcoxon test

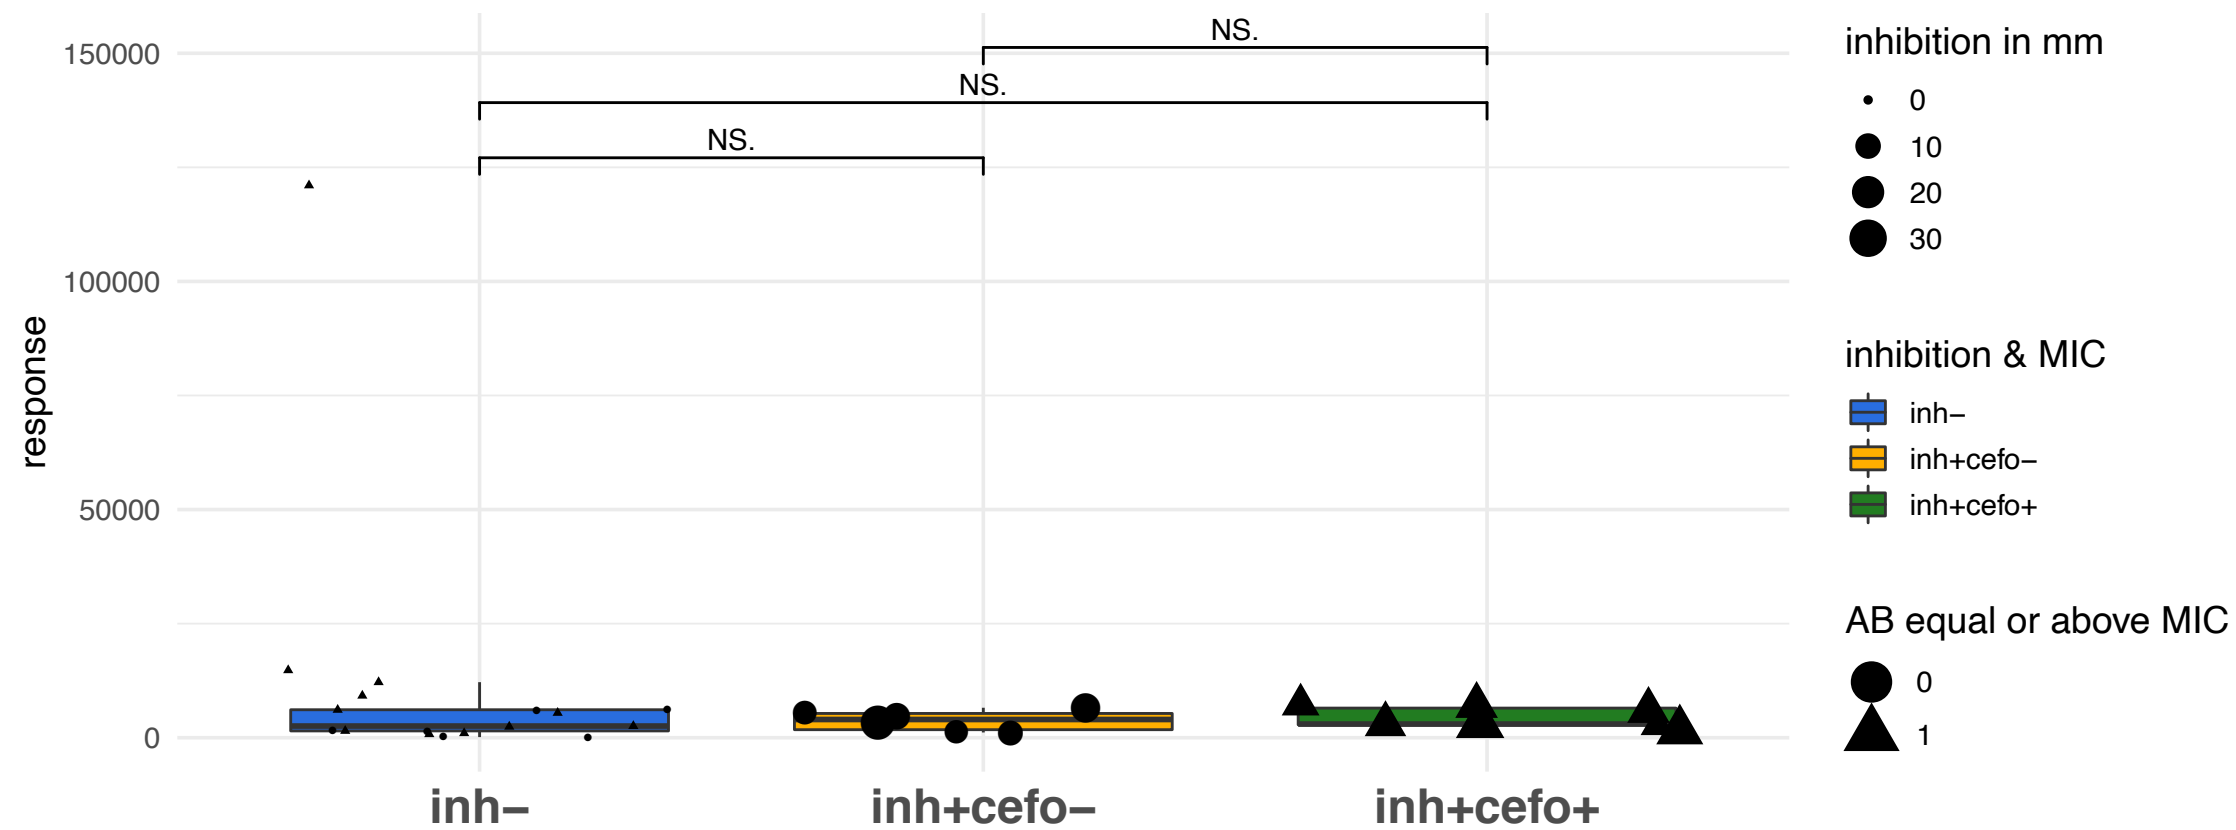

NS &gt;0.05, \* &lt;0.05, \*\* &lt;0.01, \*\*\* &lt;0.001

B

## PspA

y-axis = log<sub>10</sub>-scale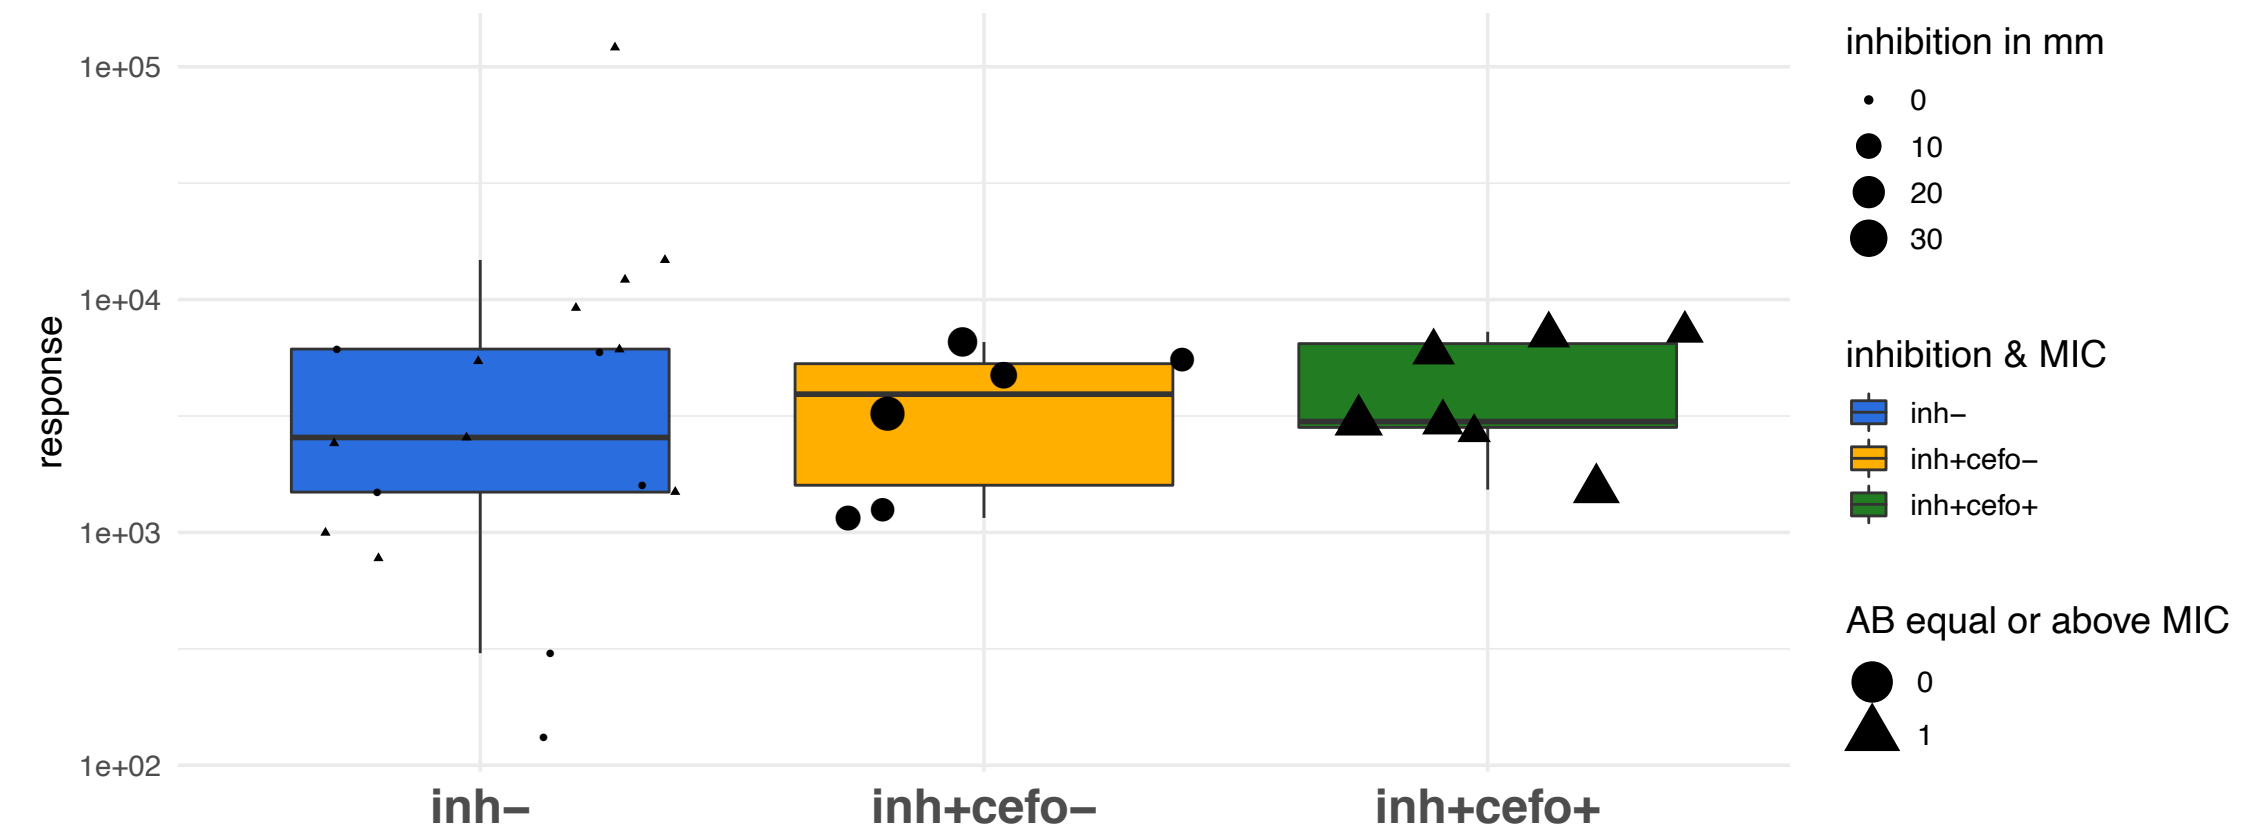

A

## PspC

unpaired wilcoxon test

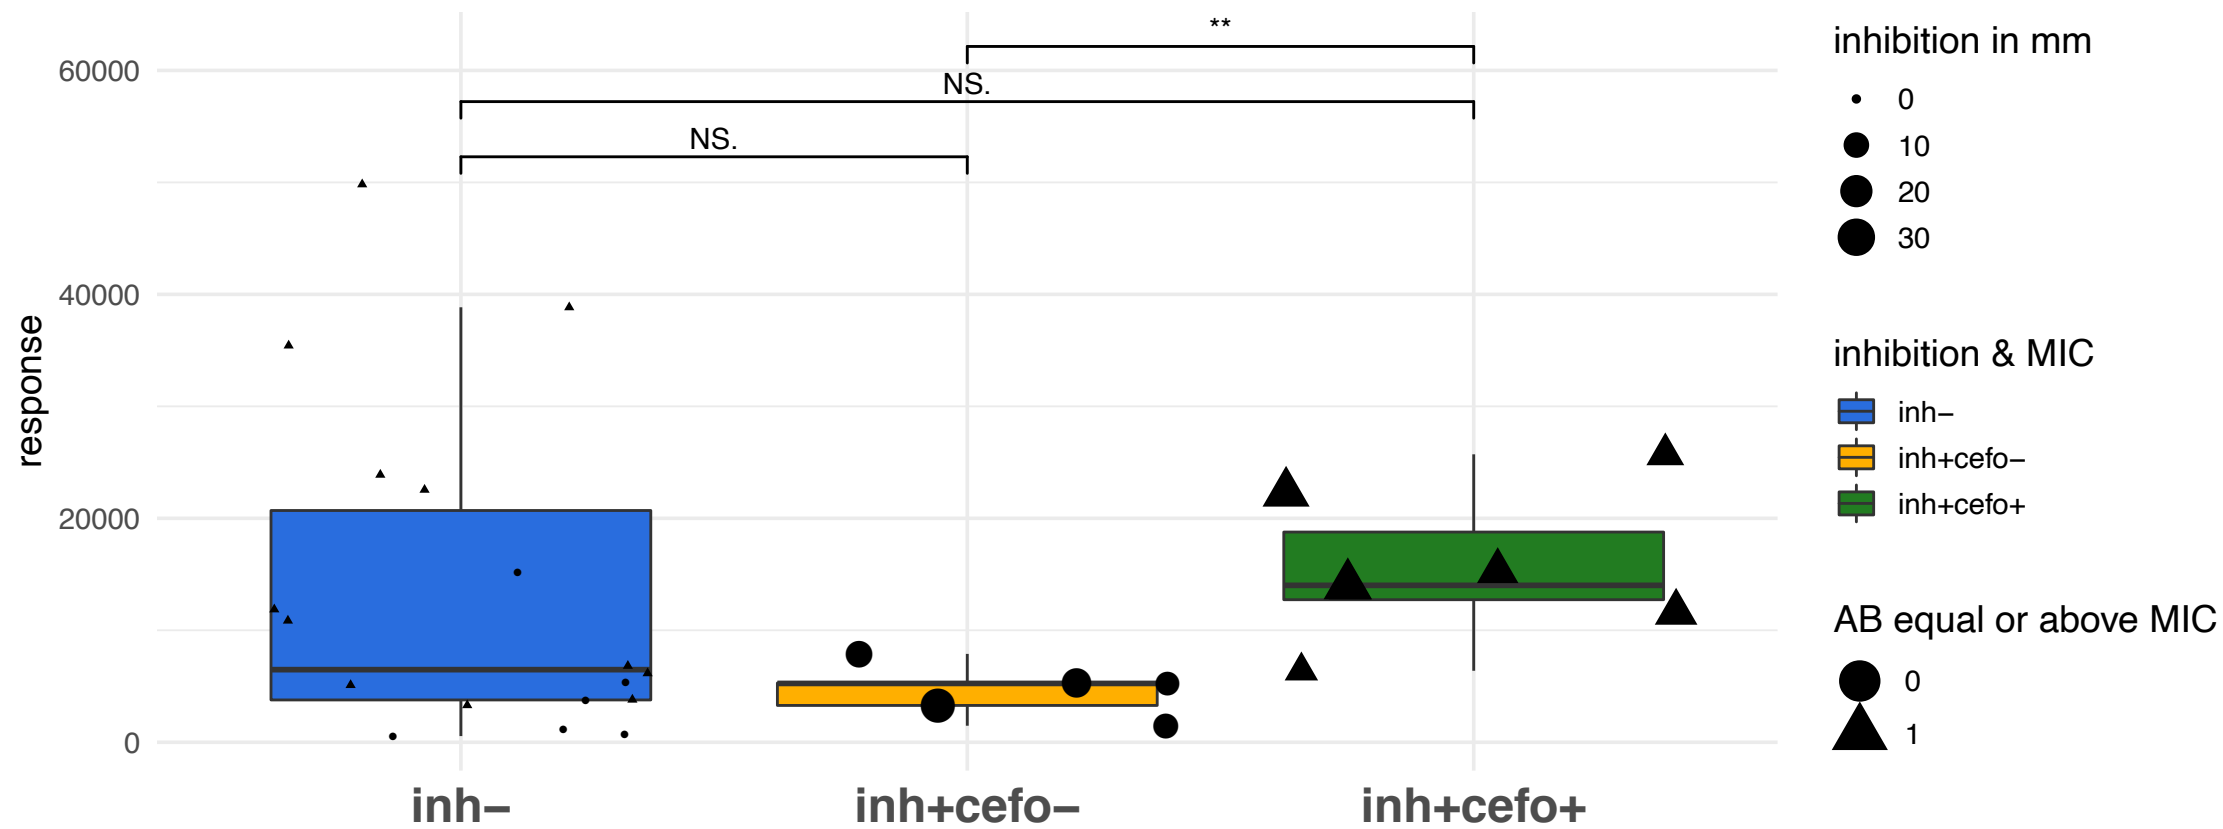

NS &gt;0.05, \* &lt;0.05, \*\* &lt;0.01, \*\*\* &lt;0.001

B

## PspC

y-axis = log<sub>10</sub>-scale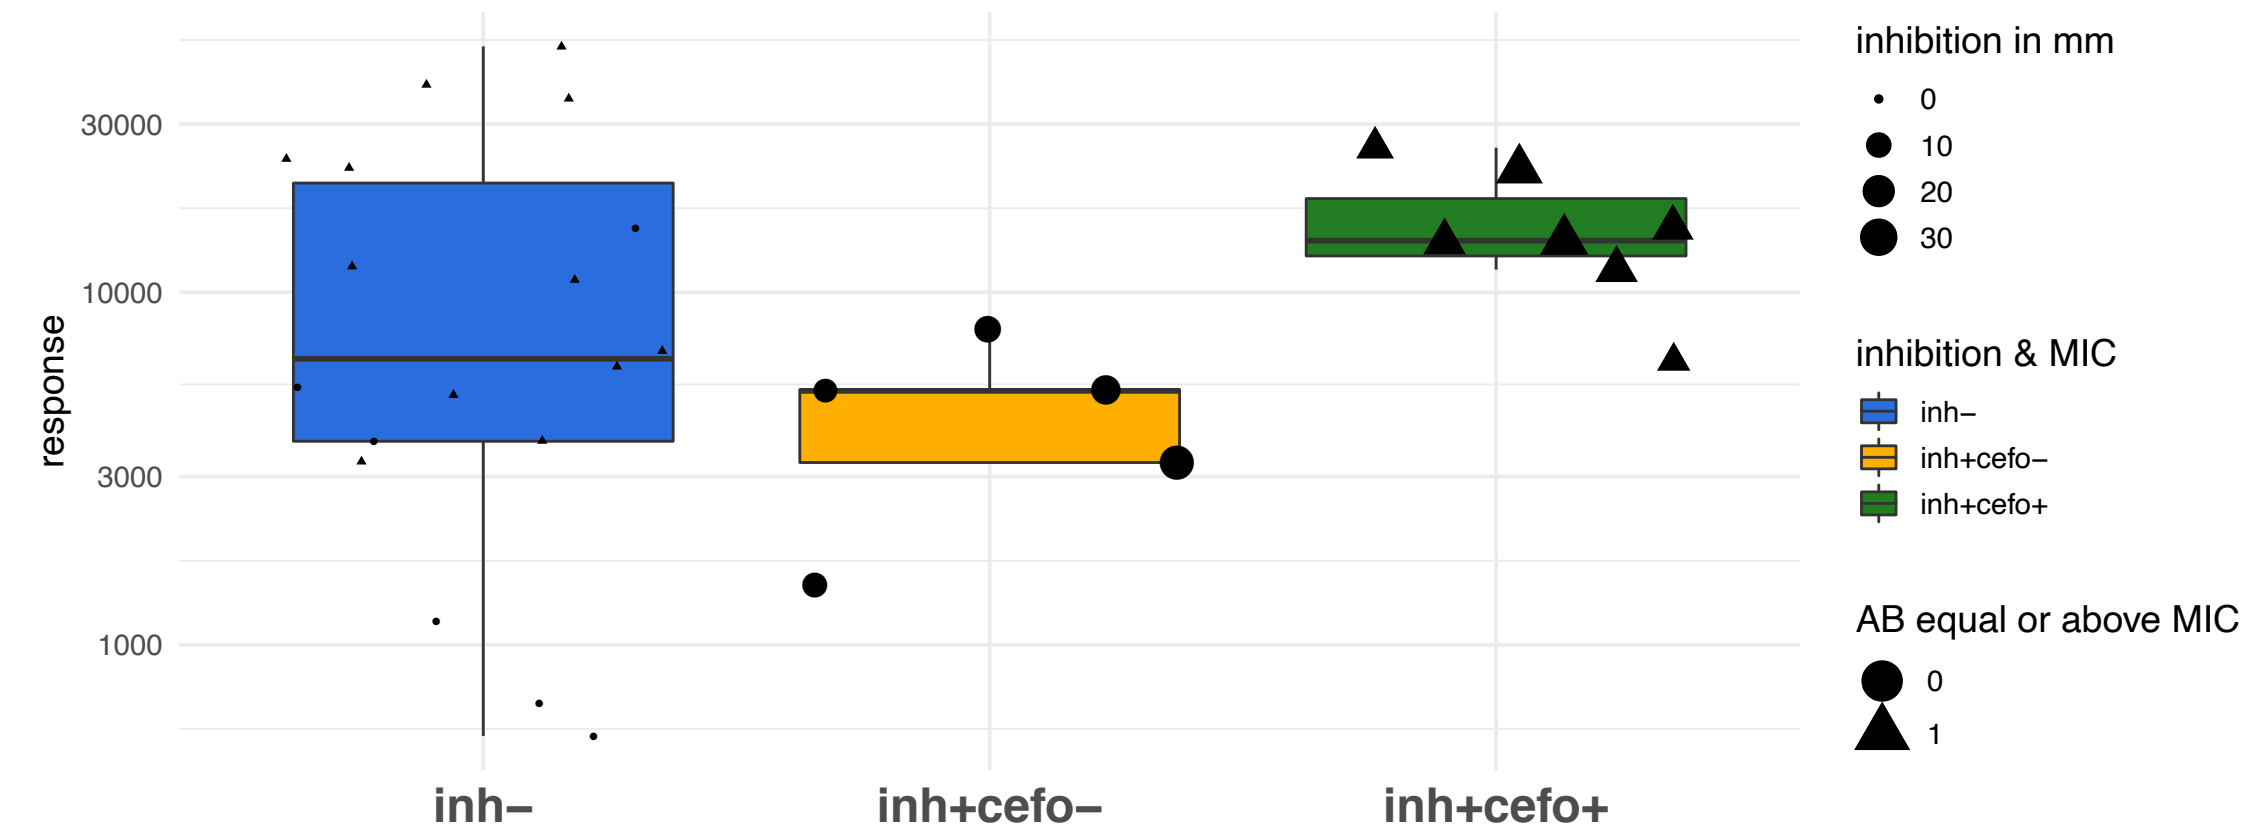

A

## PsrP

unpaired wilcoxon test

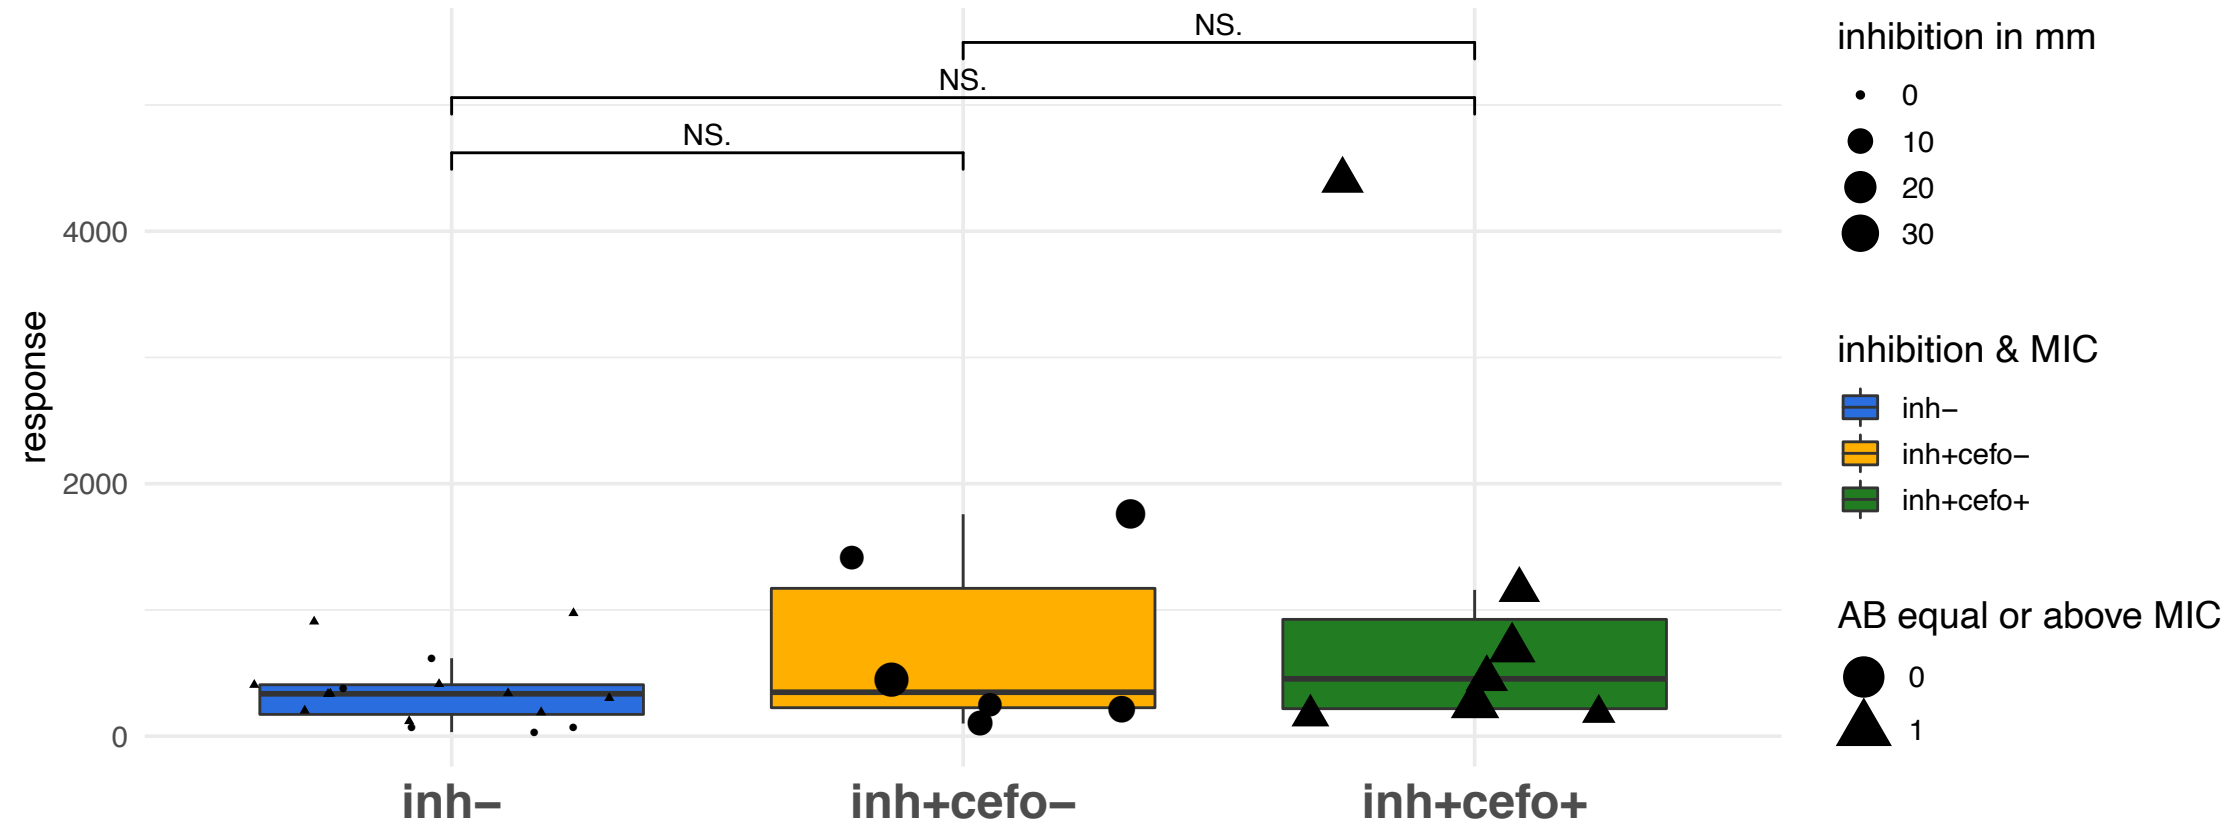

B

## PsrP

y-axis = log<sub>10</sub>-scale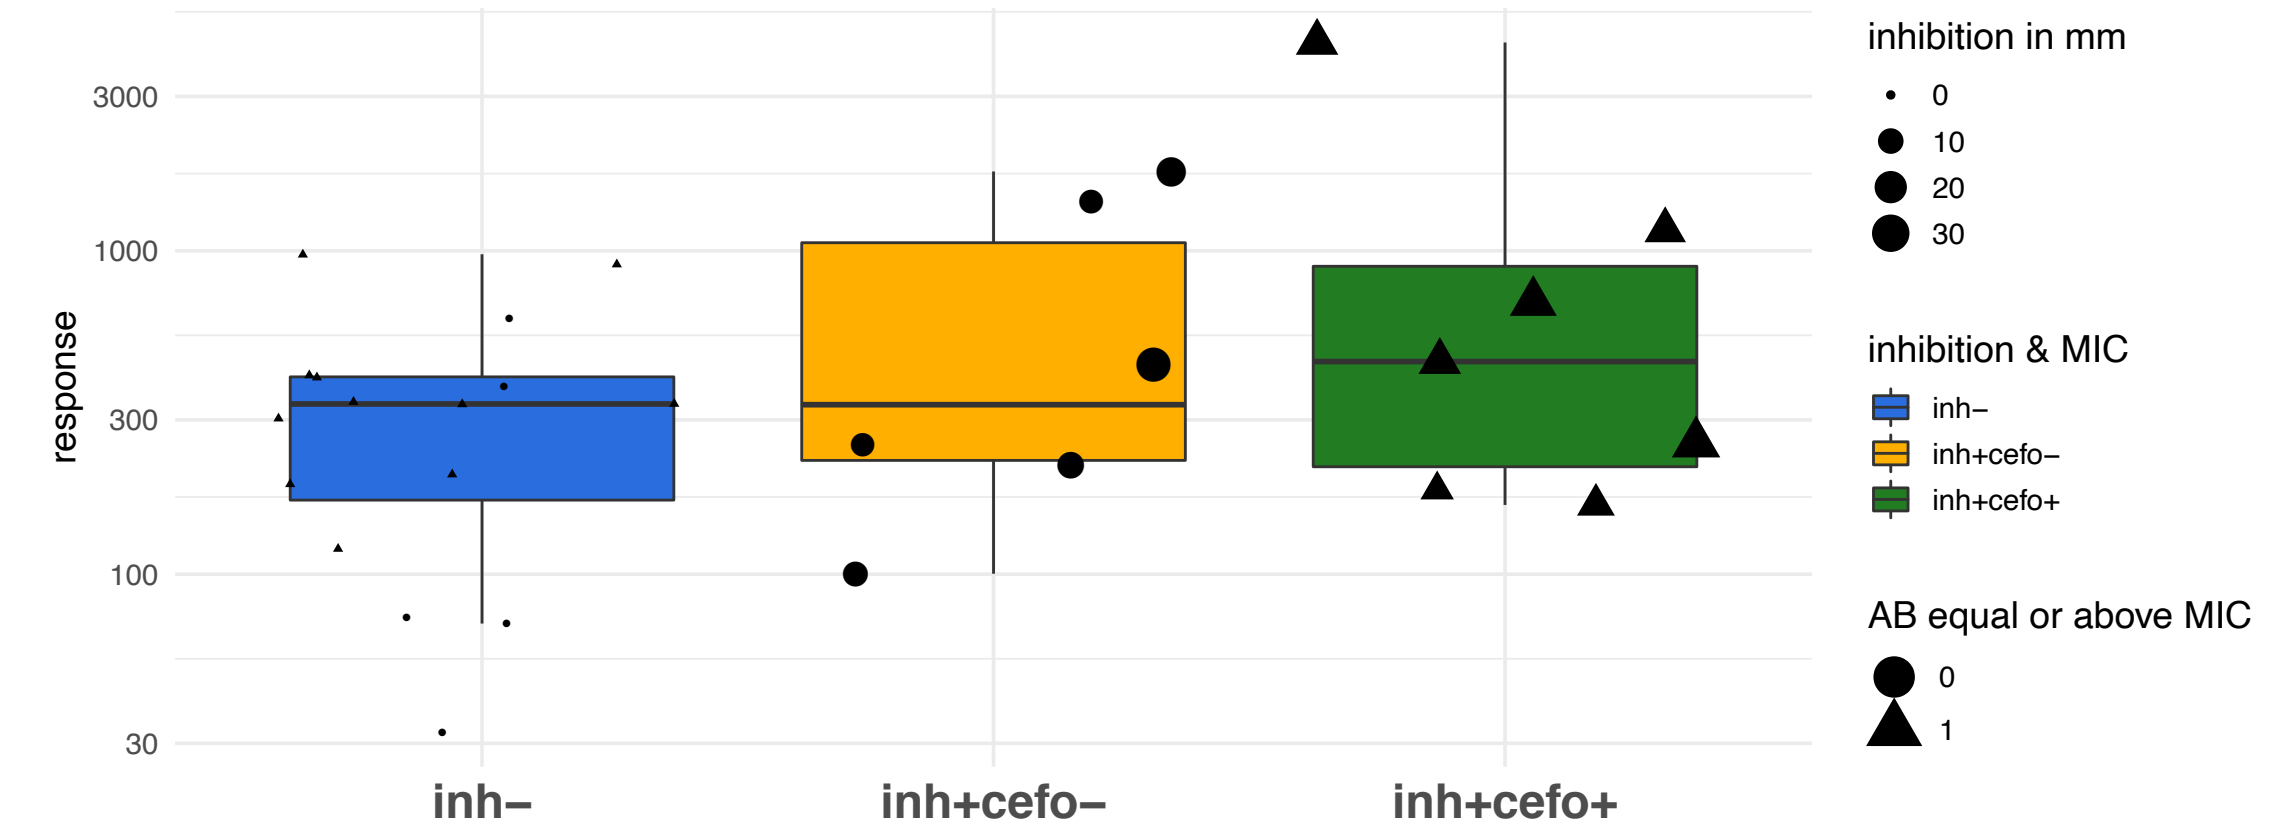

A

## RrgA

unpaired wilcoxon test

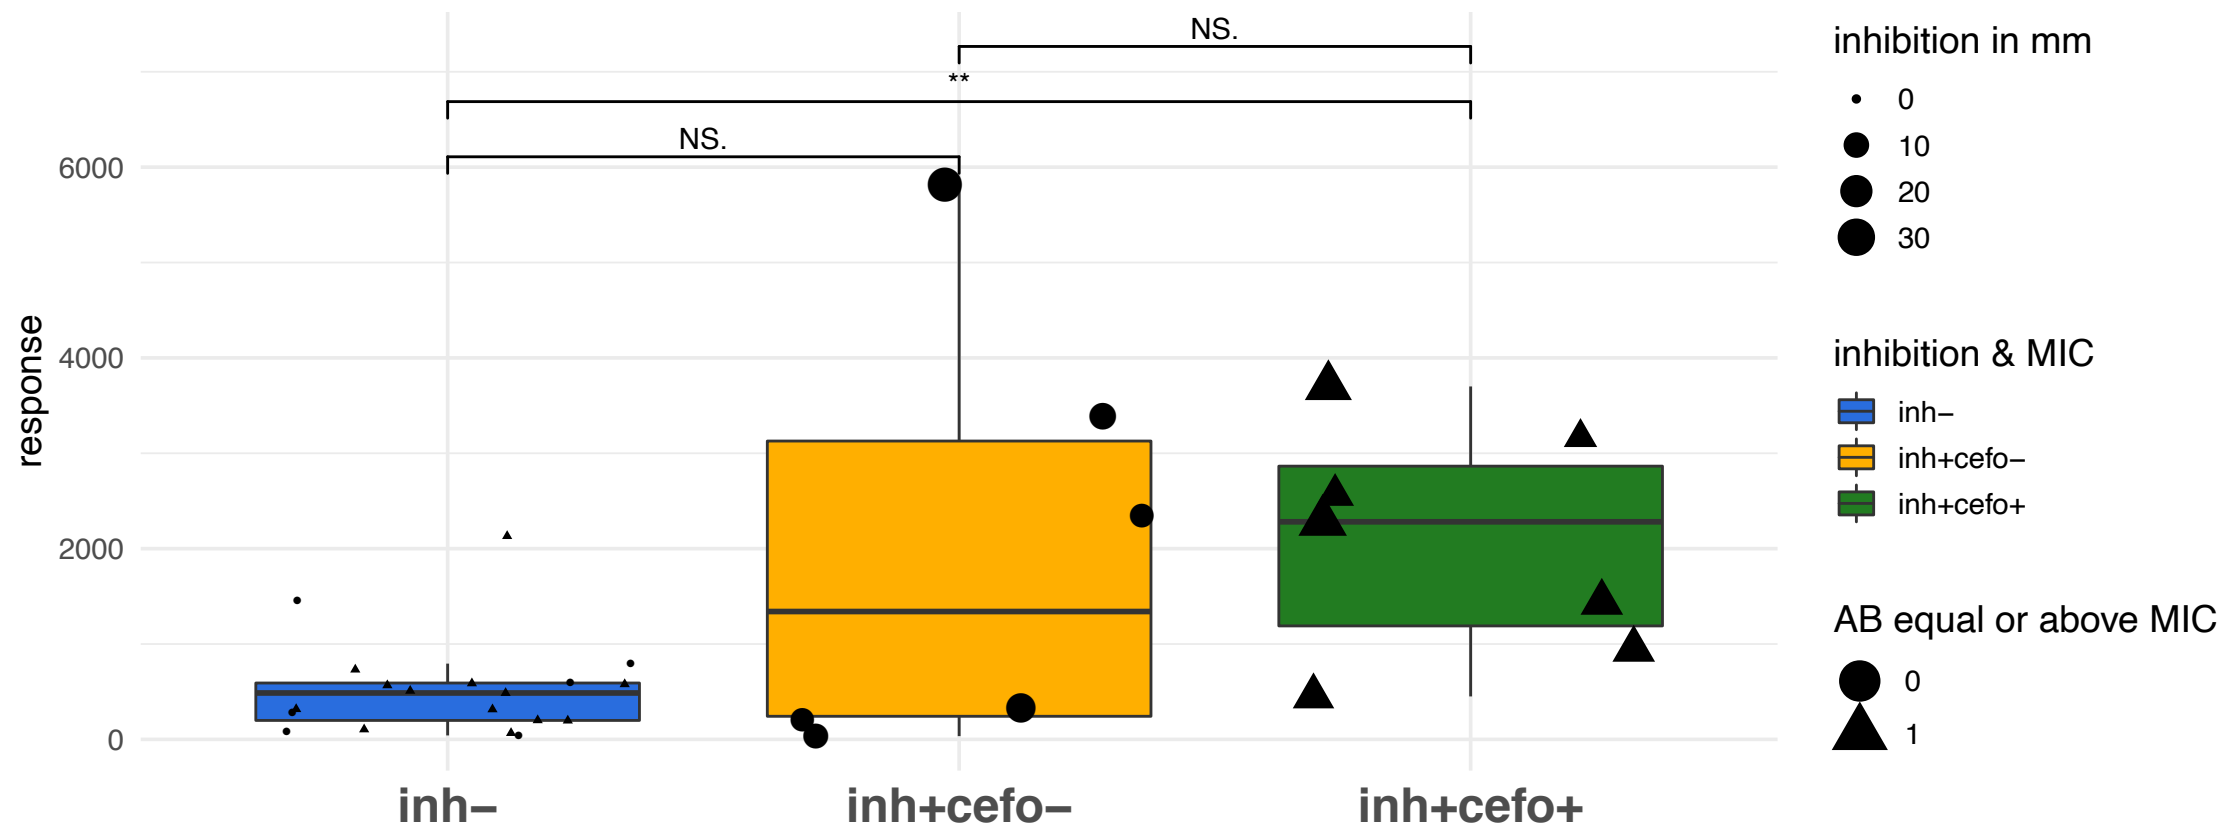

NS &gt;0.05, \* &lt;0.05, \*\* &lt;0.01, \*\*\* &lt;0.001

B

## RrgA

y-axis = log<sub>10</sub>-scale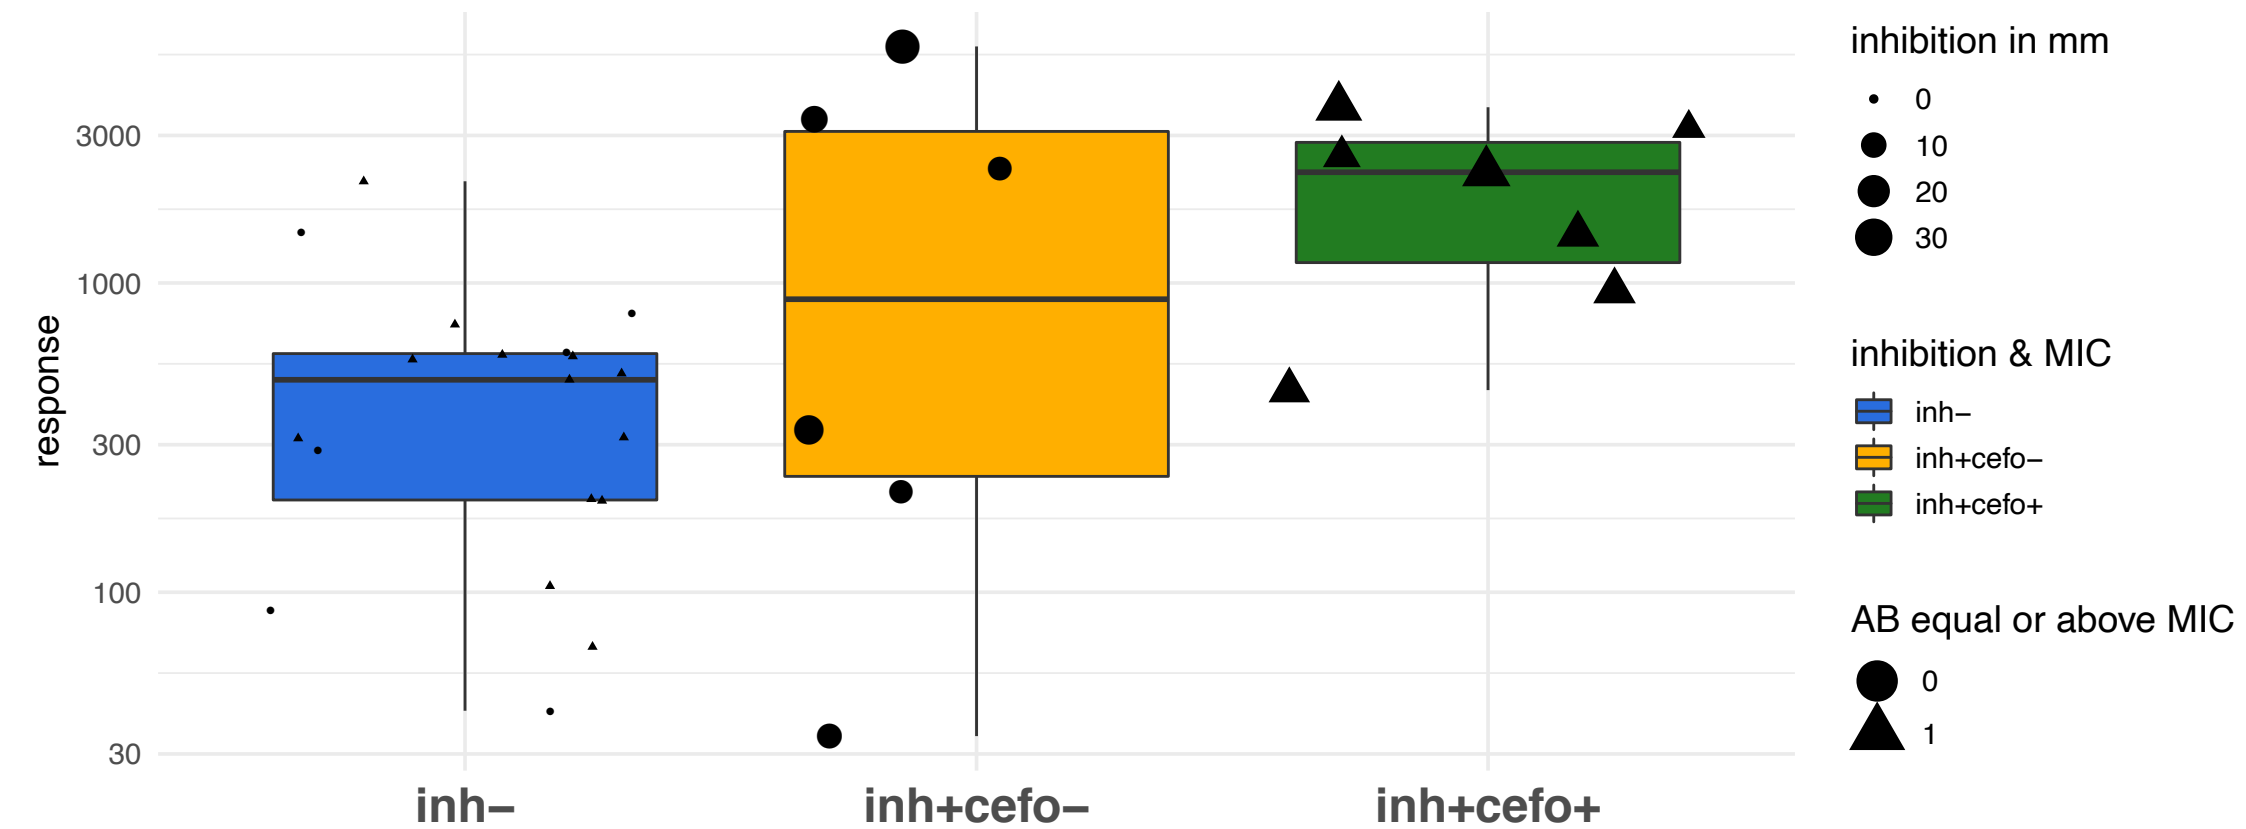

A

## RrgB

unpaired wilcoxon test

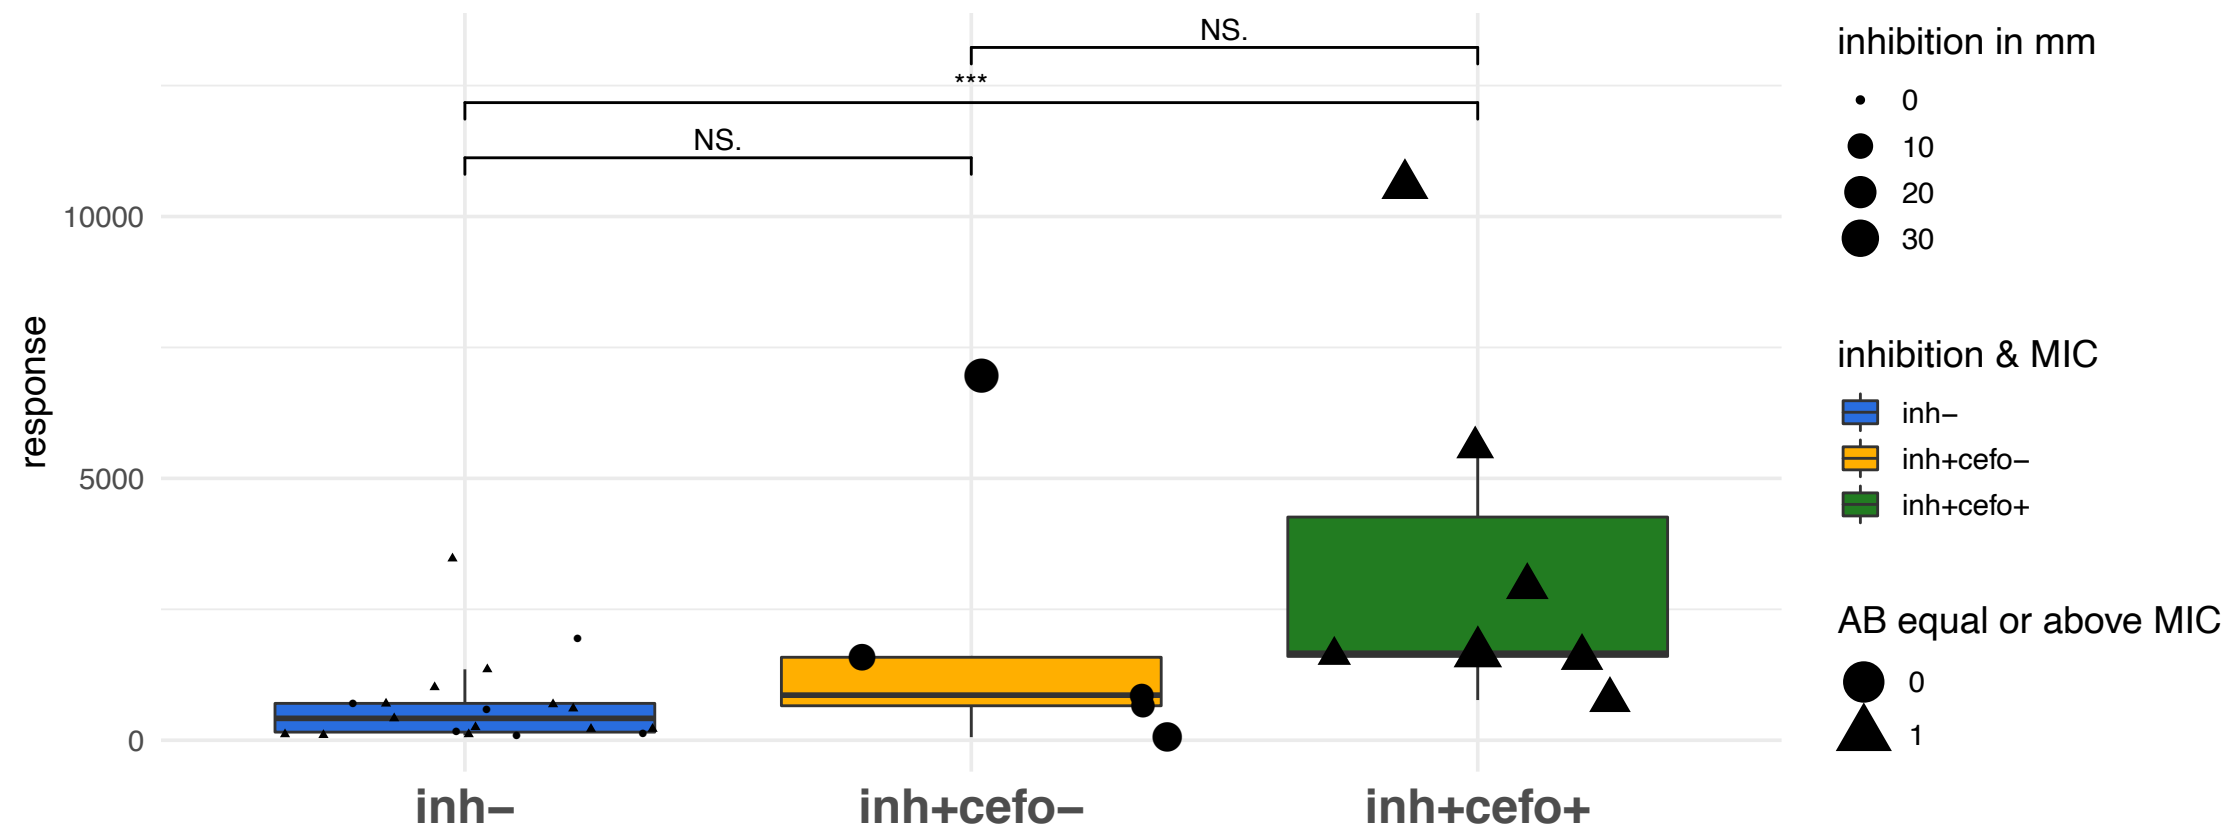

NS &gt;0.05, \* &lt;0.05, \*\* &lt;0.01, \*\*\* &lt;0.001

B

## RrgB

y-axis = log<sub>10</sub>-scale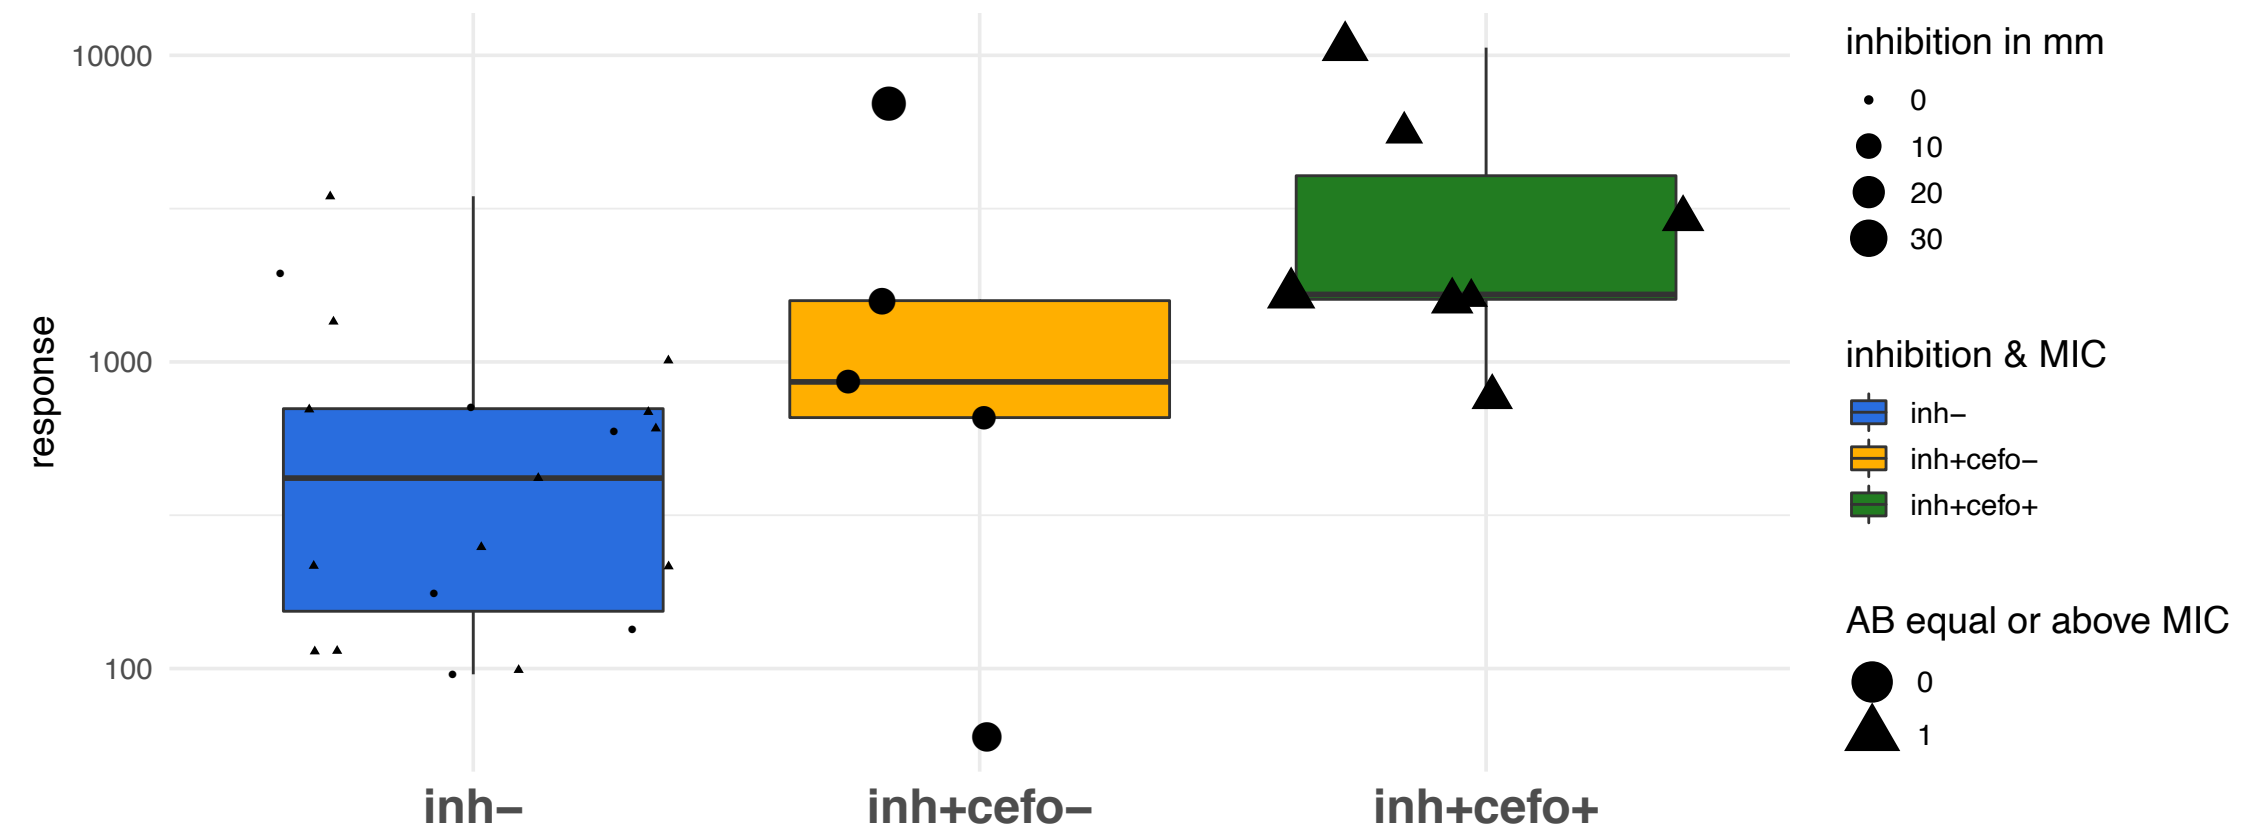

A

## RrgC

unpaired wilcoxon test

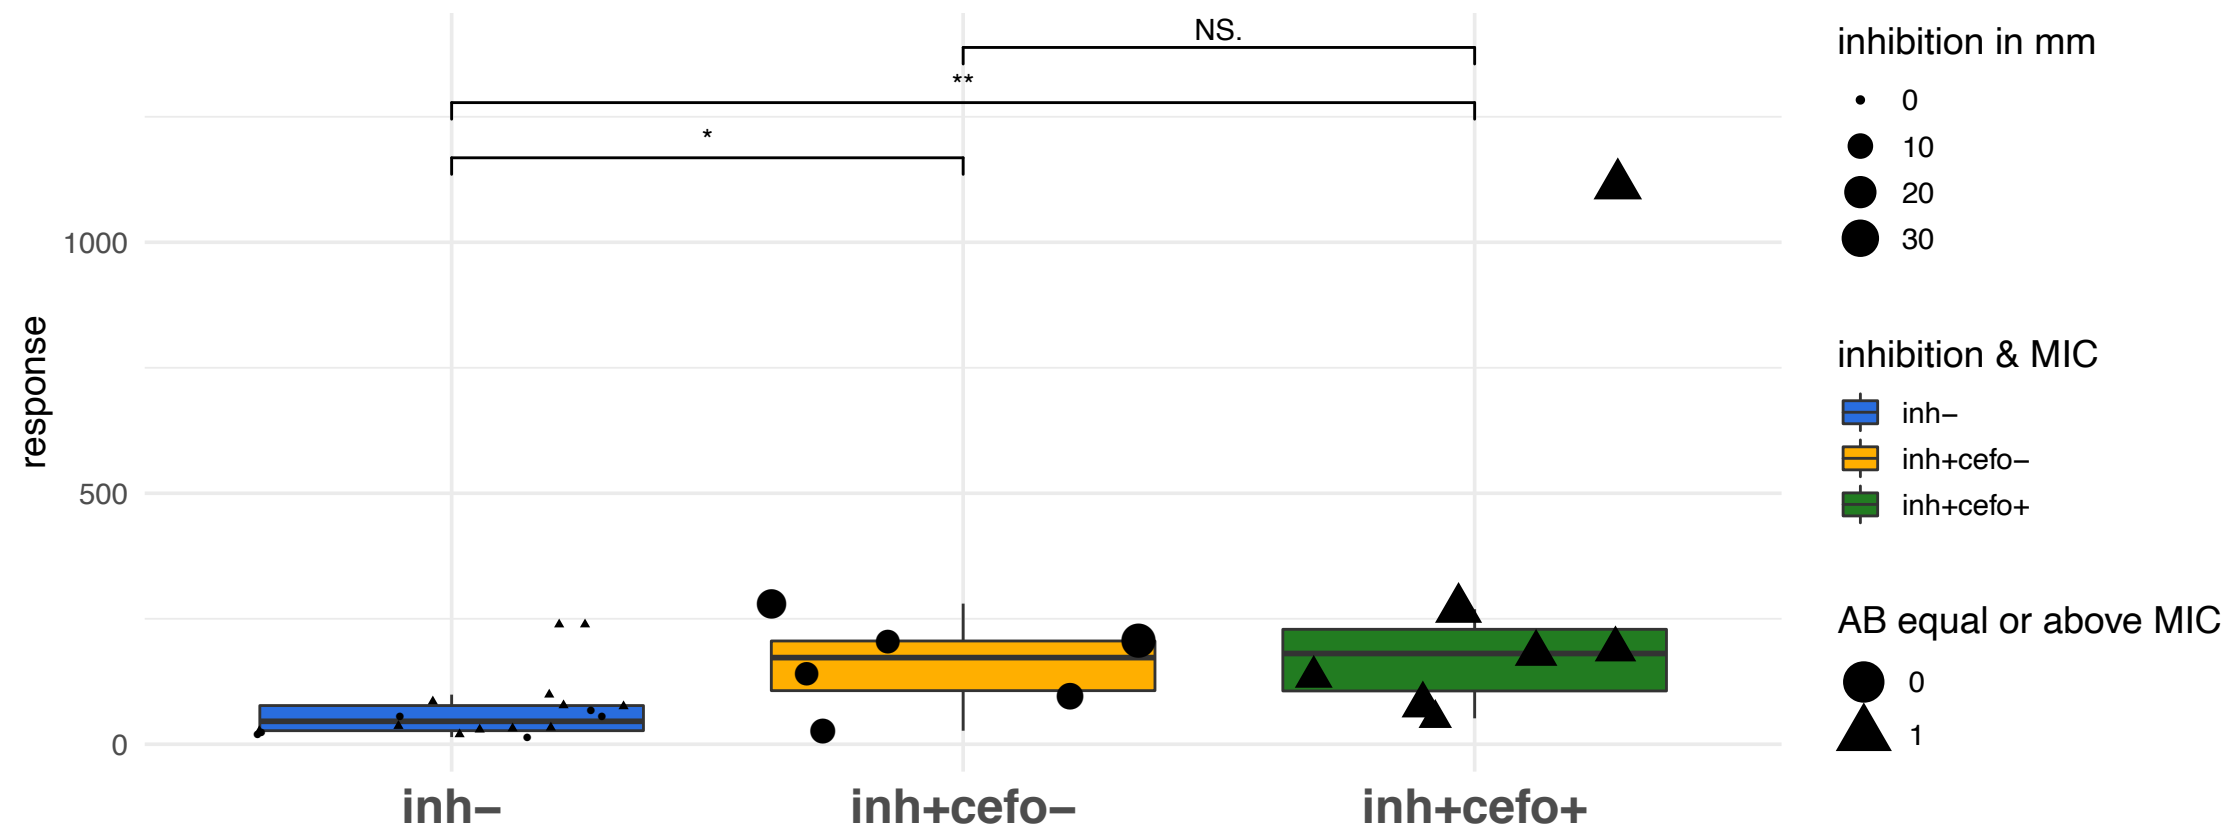

NS &gt;0.05, \* &lt;0.05, \*\* &lt;0.01, \*\*\* &lt;0.001

B

## RrgC

y-axis = log<sub>10</sub>-scale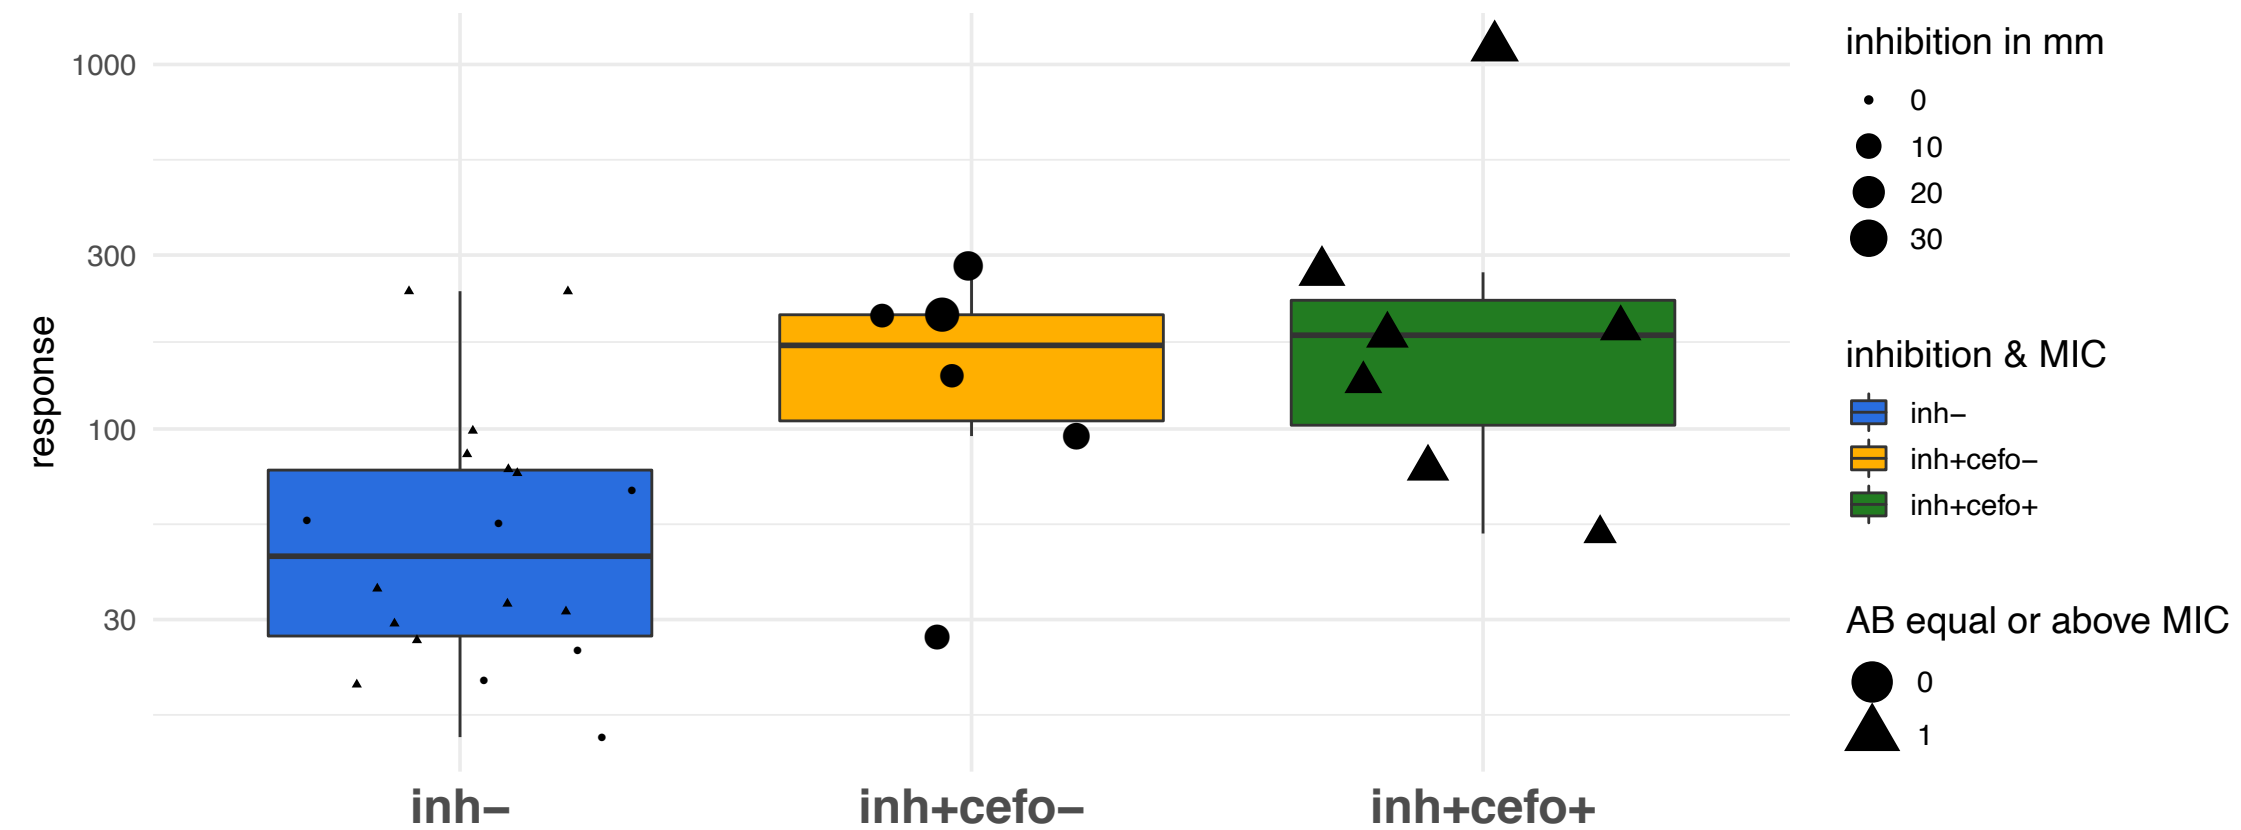

A

## SlrA

unpaired wilcoxon test

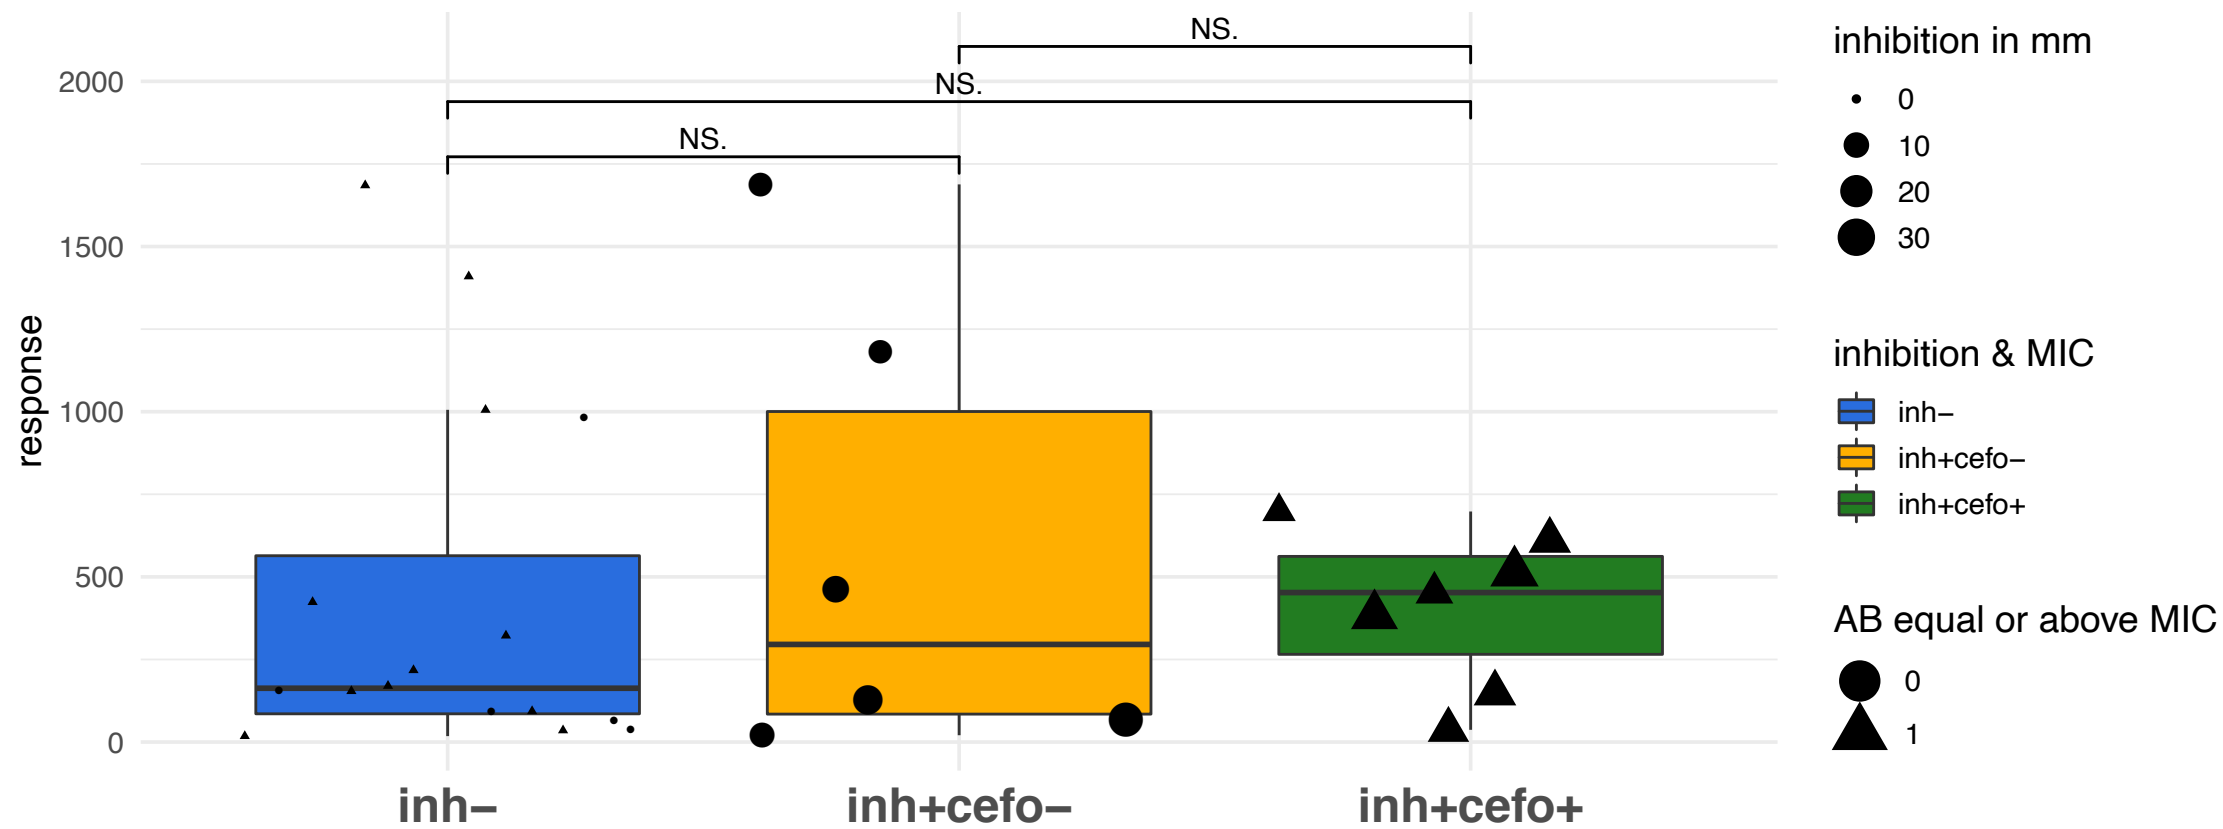

NS &gt;0.05, \* &lt;0.05, \*\* &lt;0.01, \*\*\* &lt;0.001

B

## SlrA

y-axis = log<sub>10</sub>-scale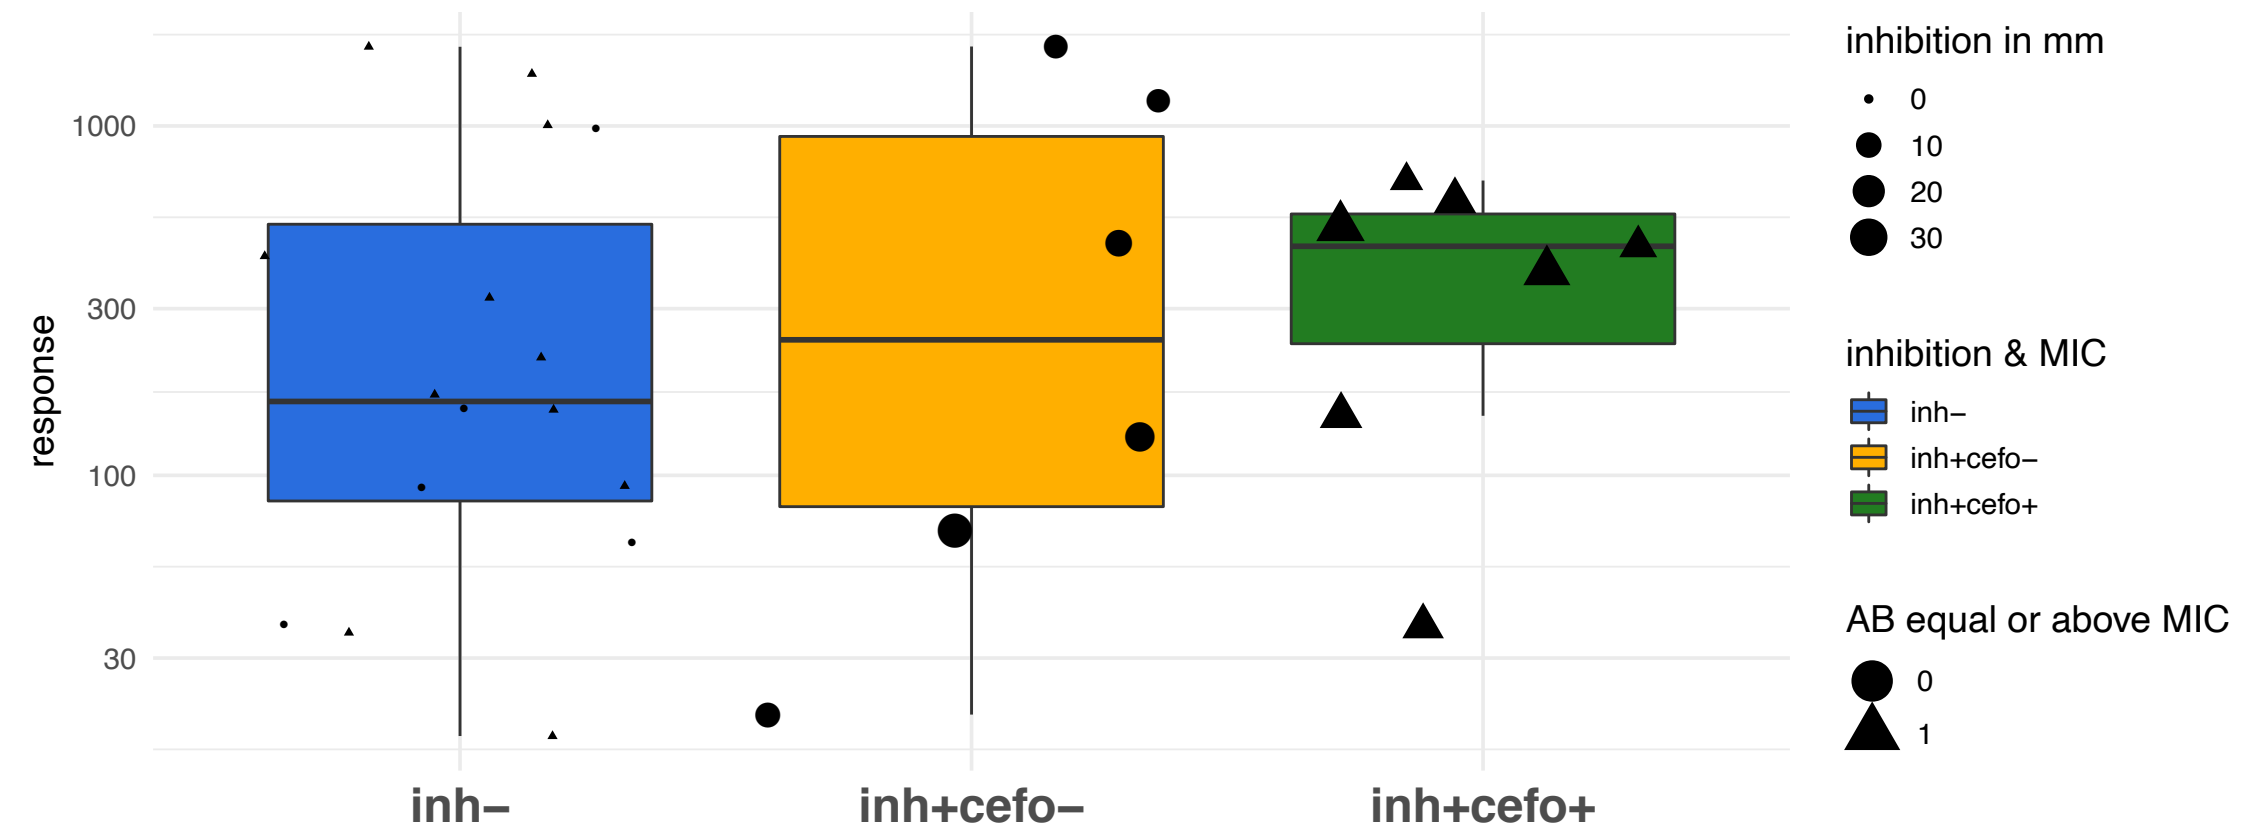

A

SP\_0107

unpaired wilcoxon test

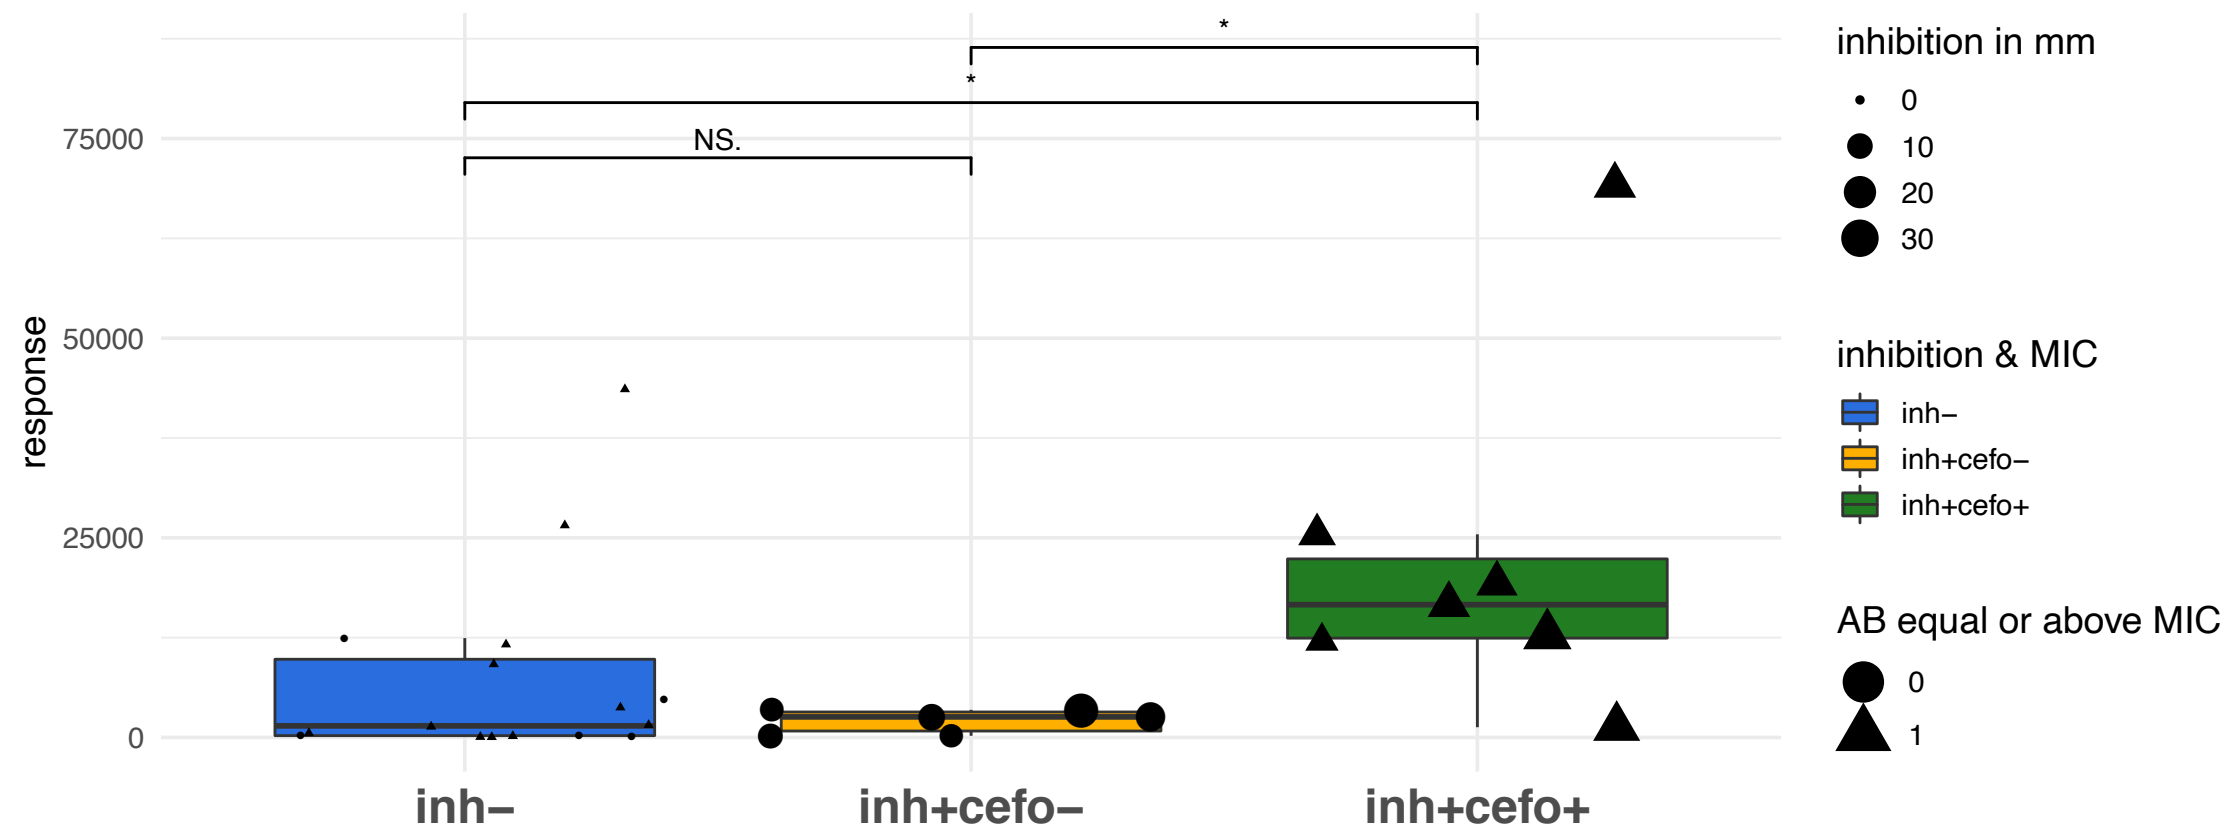

NS &gt;0.05, \* &lt;0.05, \*\* &lt;0.01, \*\*\* &lt;0.001

B

SP\_0107

y-axis = log<sub>10</sub>-scale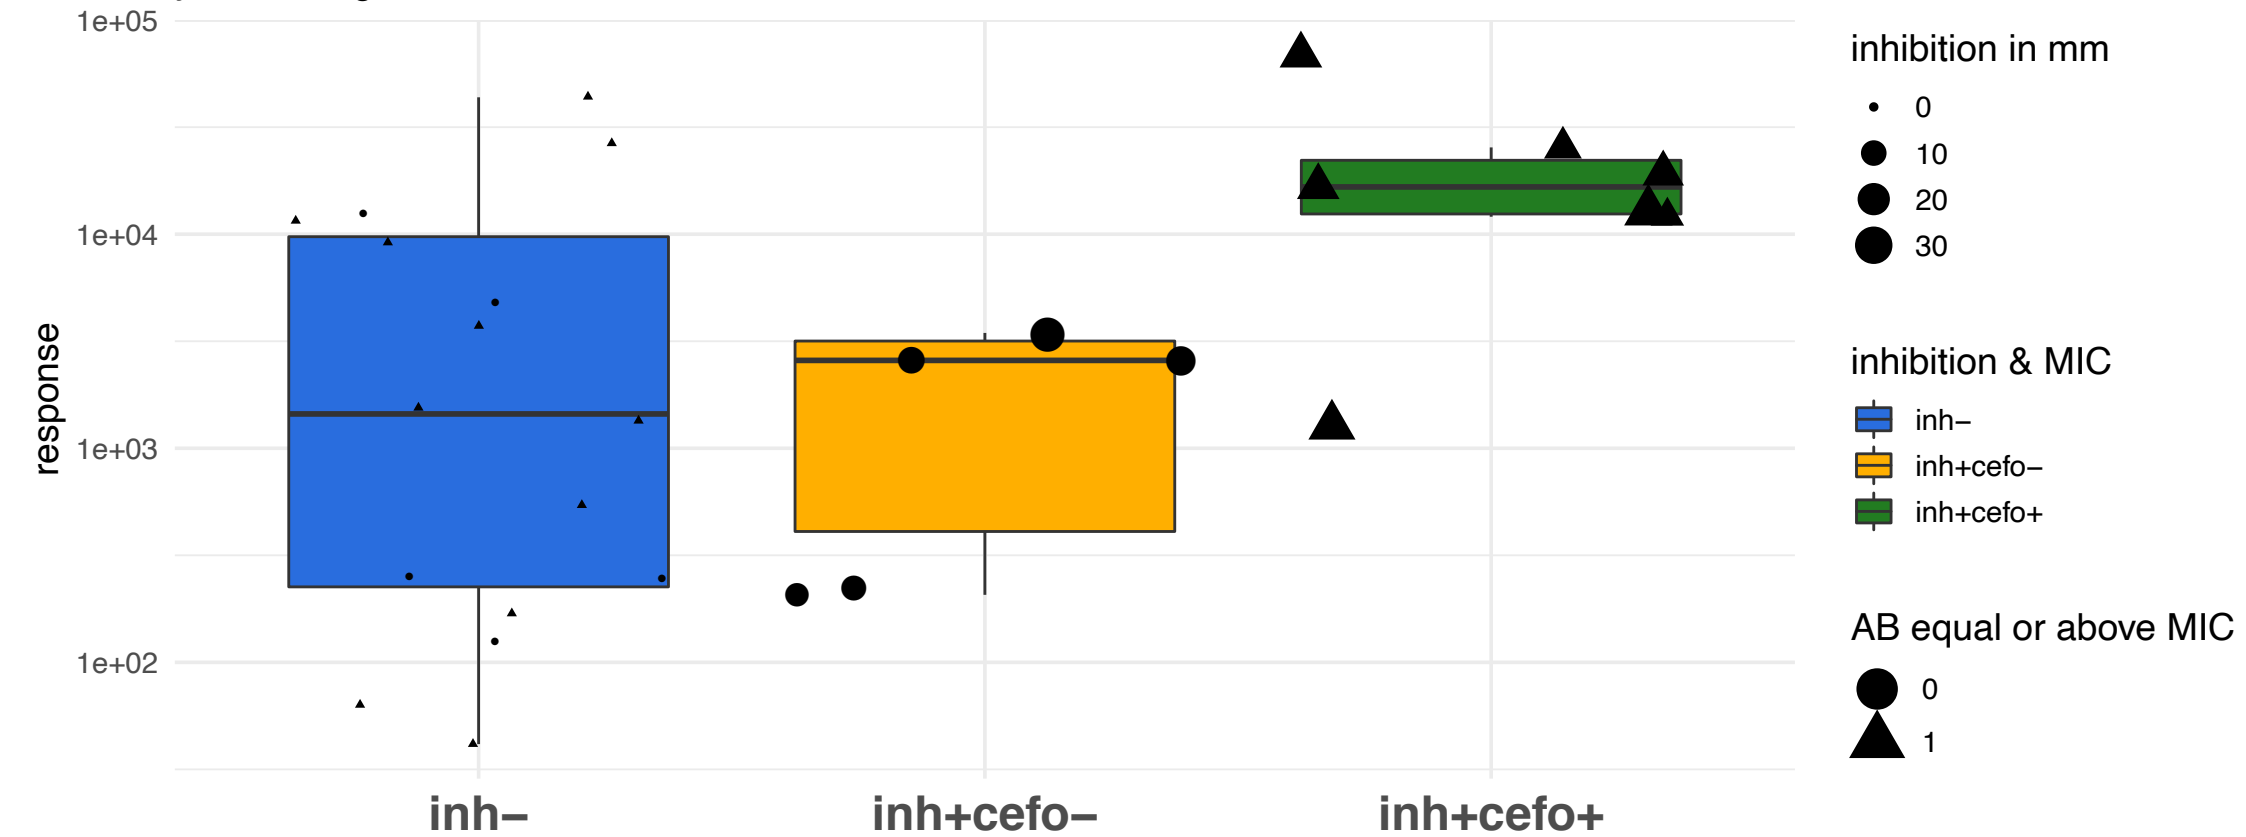



A

SP\_0148

unpaired wilcoxon test

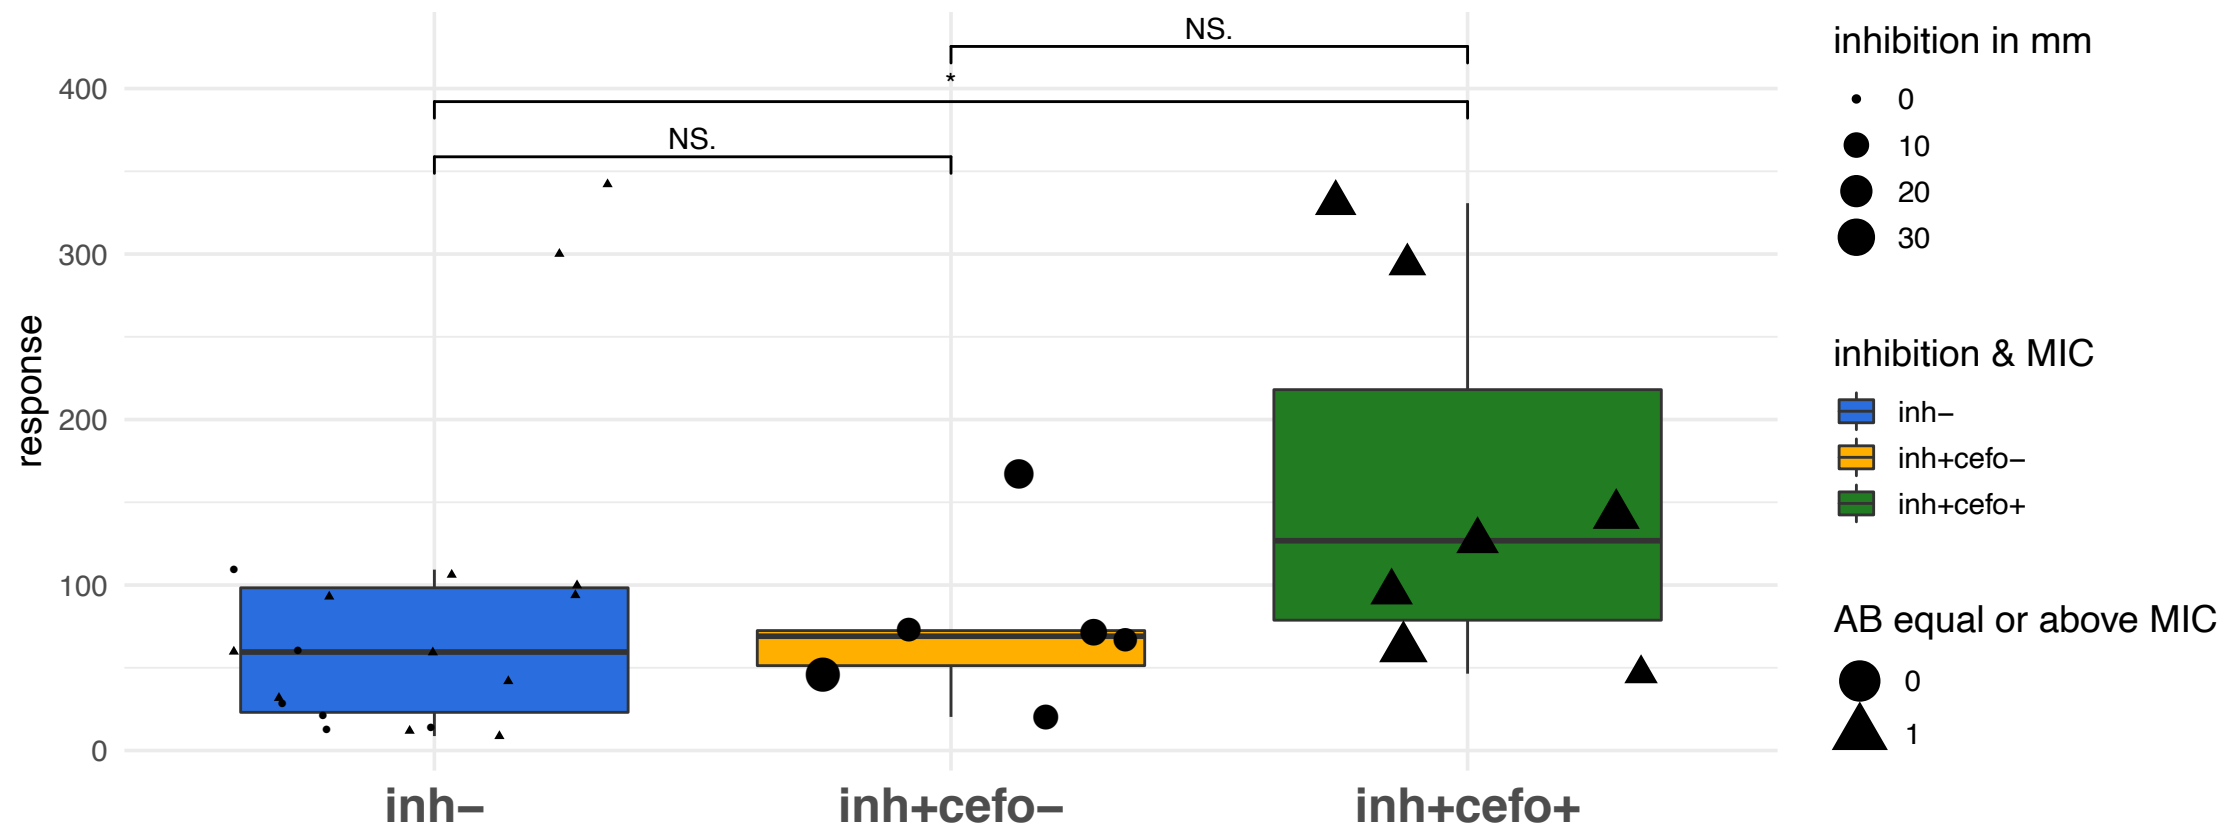

NS &gt;0.05, \* &lt;0.05, \*\* &lt;0.01, \*\*\* &lt;0.001

B

SP\_0148

y-axis = log<sub>10</sub>-scale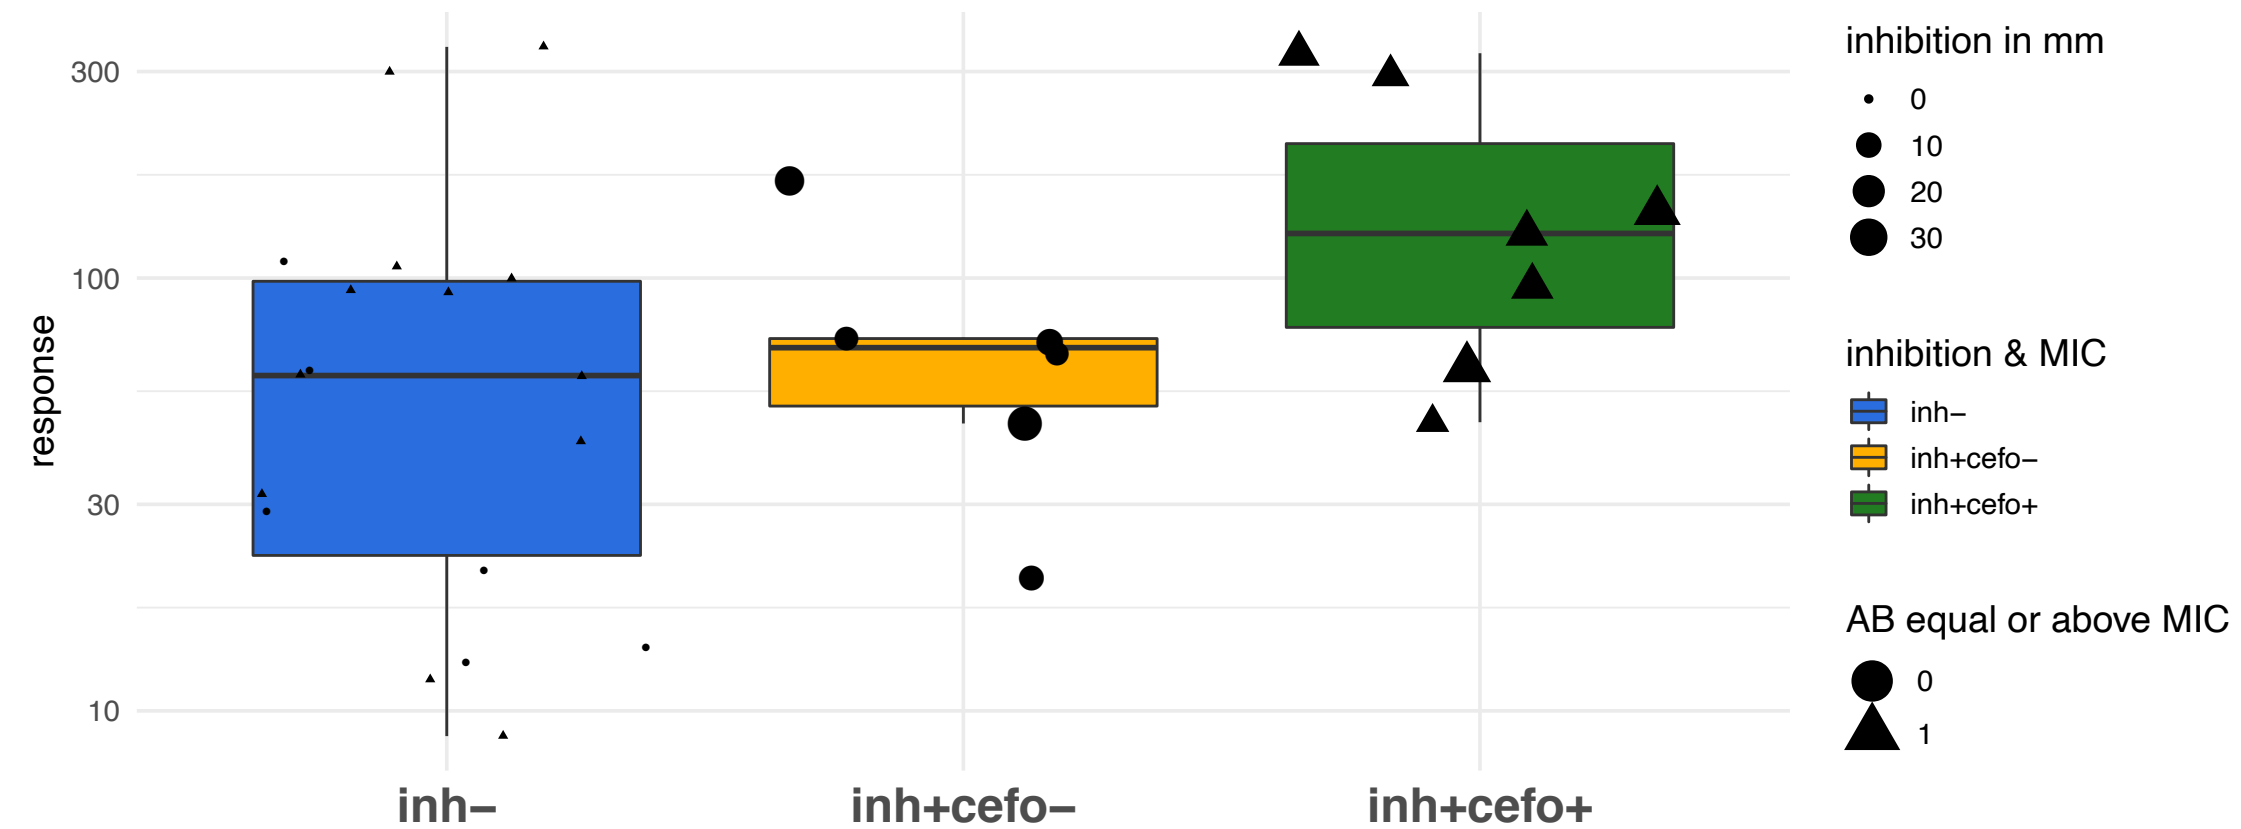

A

## SP\_0191

unpaired wilcoxon test

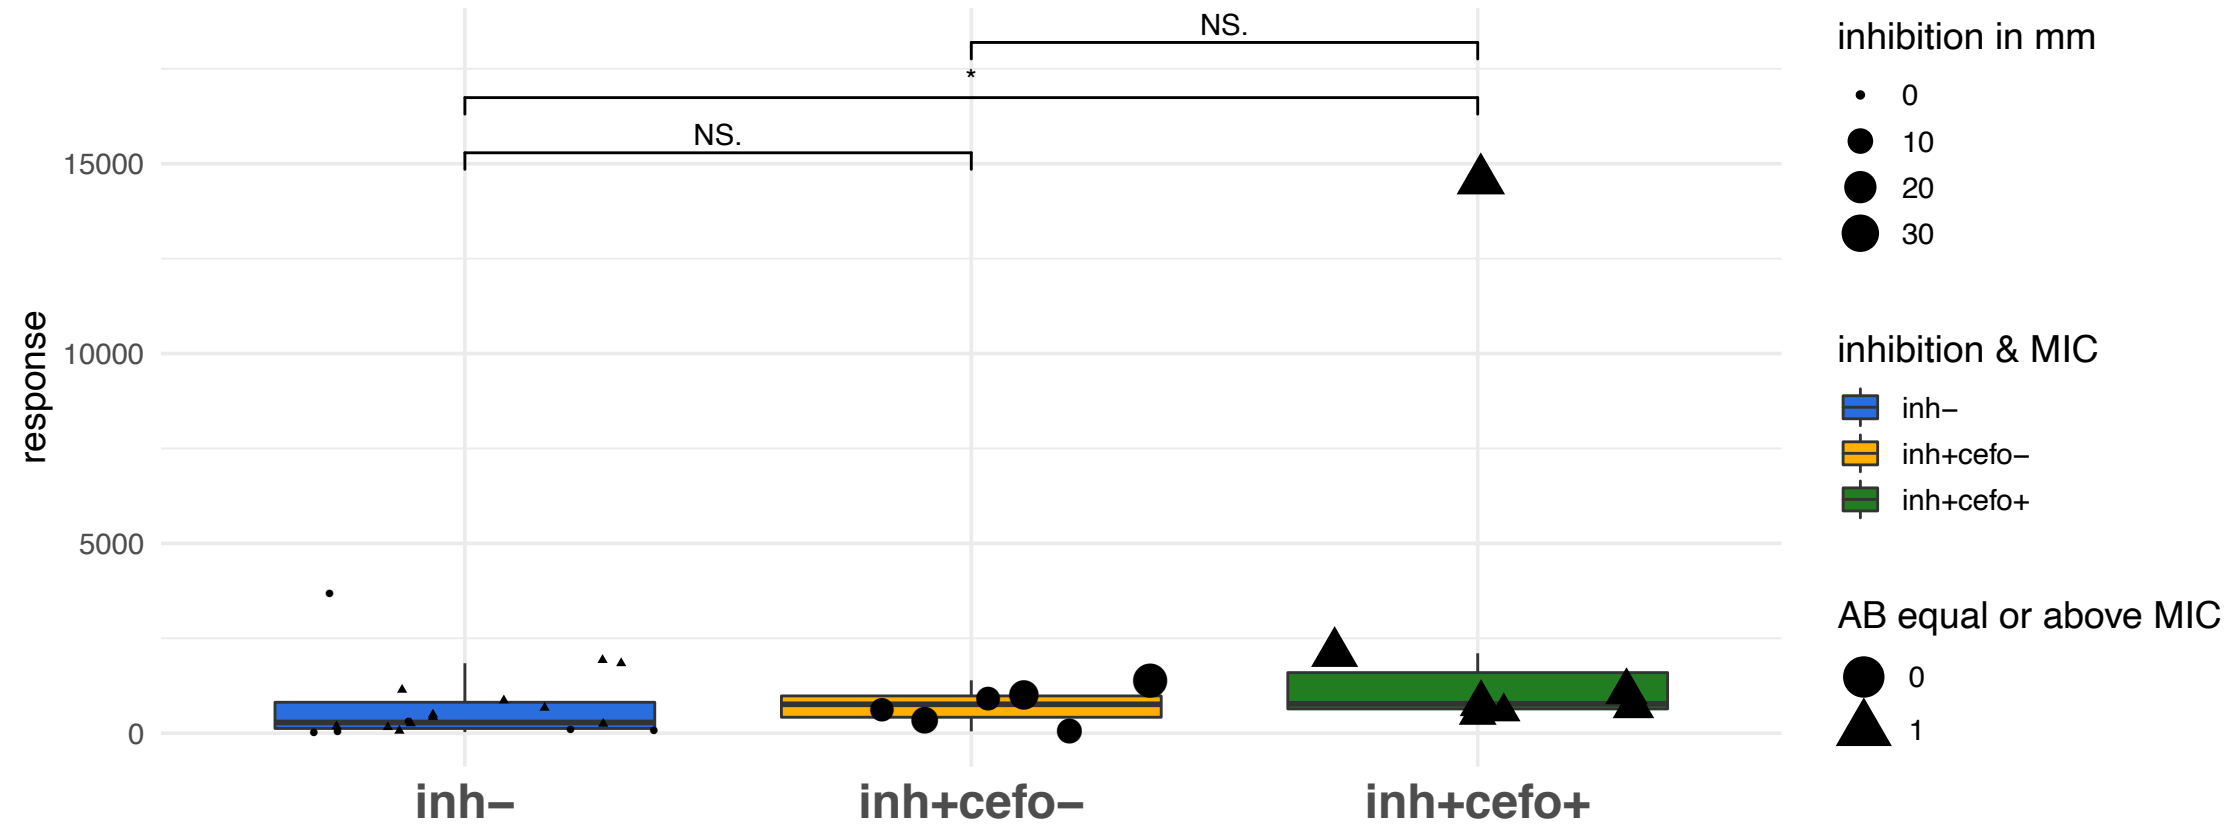

NS &gt;0.05, \* &lt;0.05, \*\* &lt;0.01, \*\*\* &lt;0.001

B

## SP\_0191

y-axis = log<sub>10</sub>-scale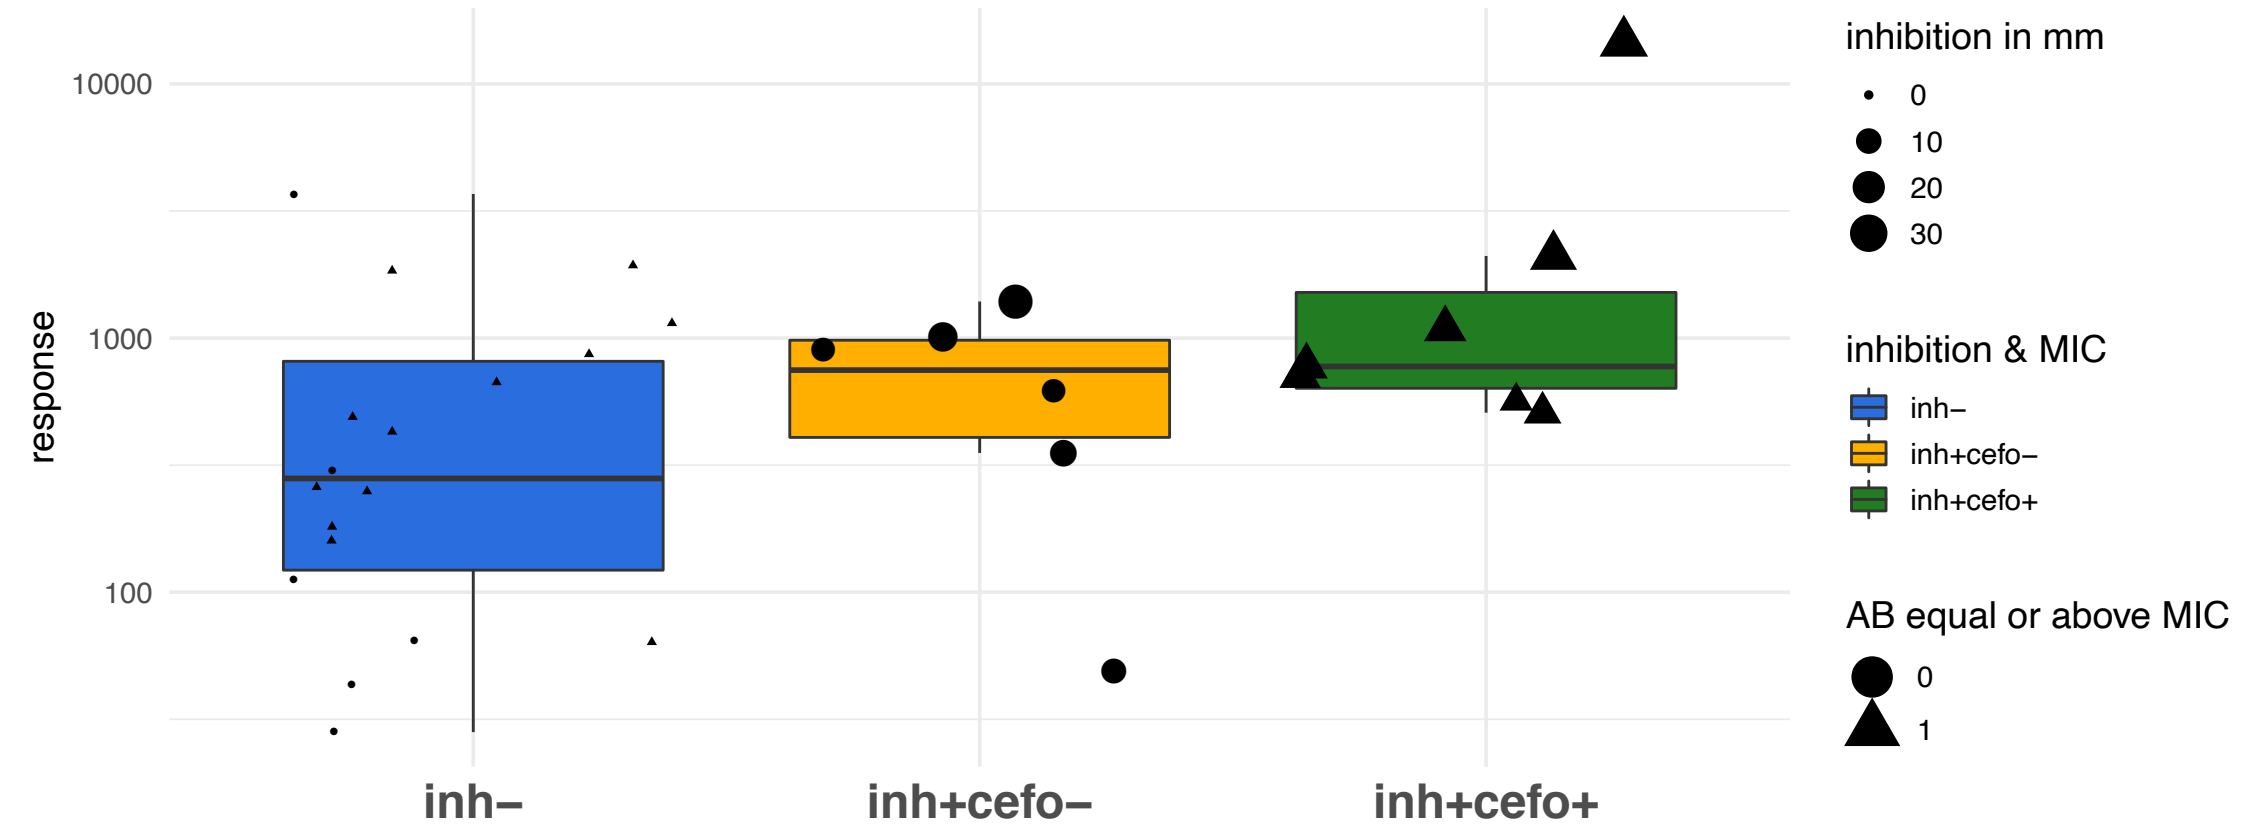

A

## SP\_1069

unpaired wilcoxon test

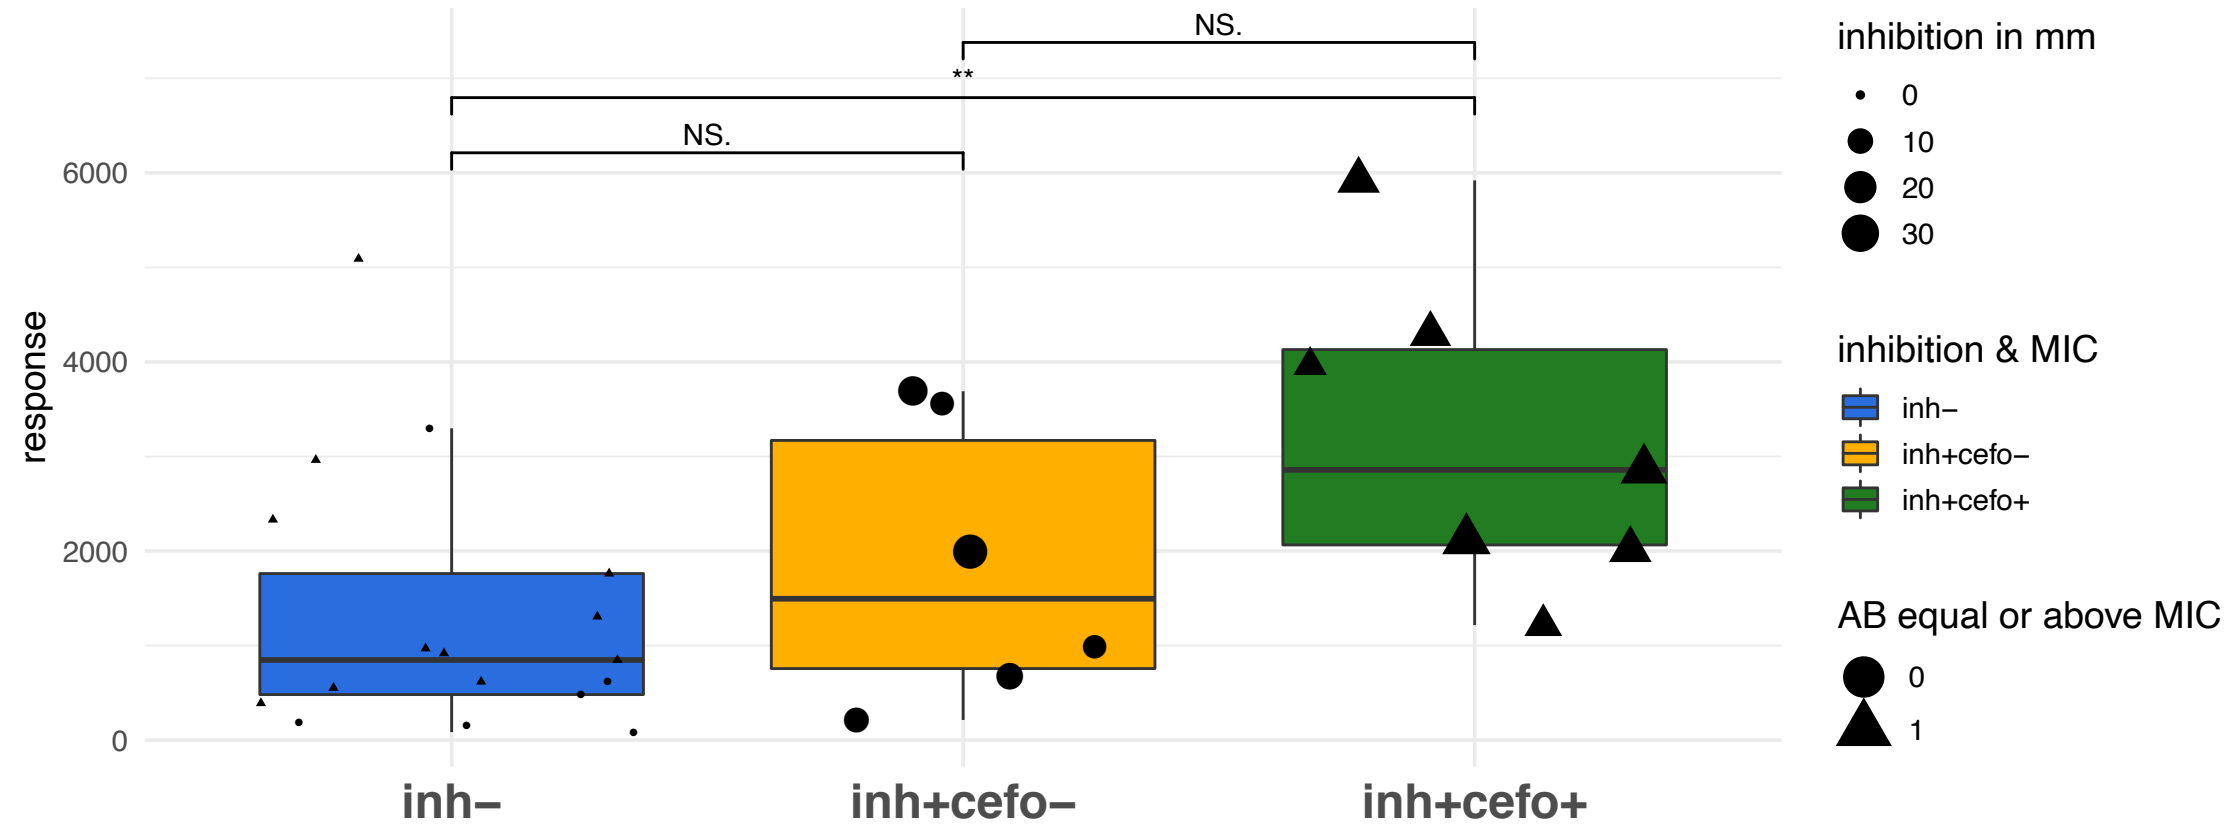

B

## SP\_1069

y-axis = log<sub>10</sub>-scale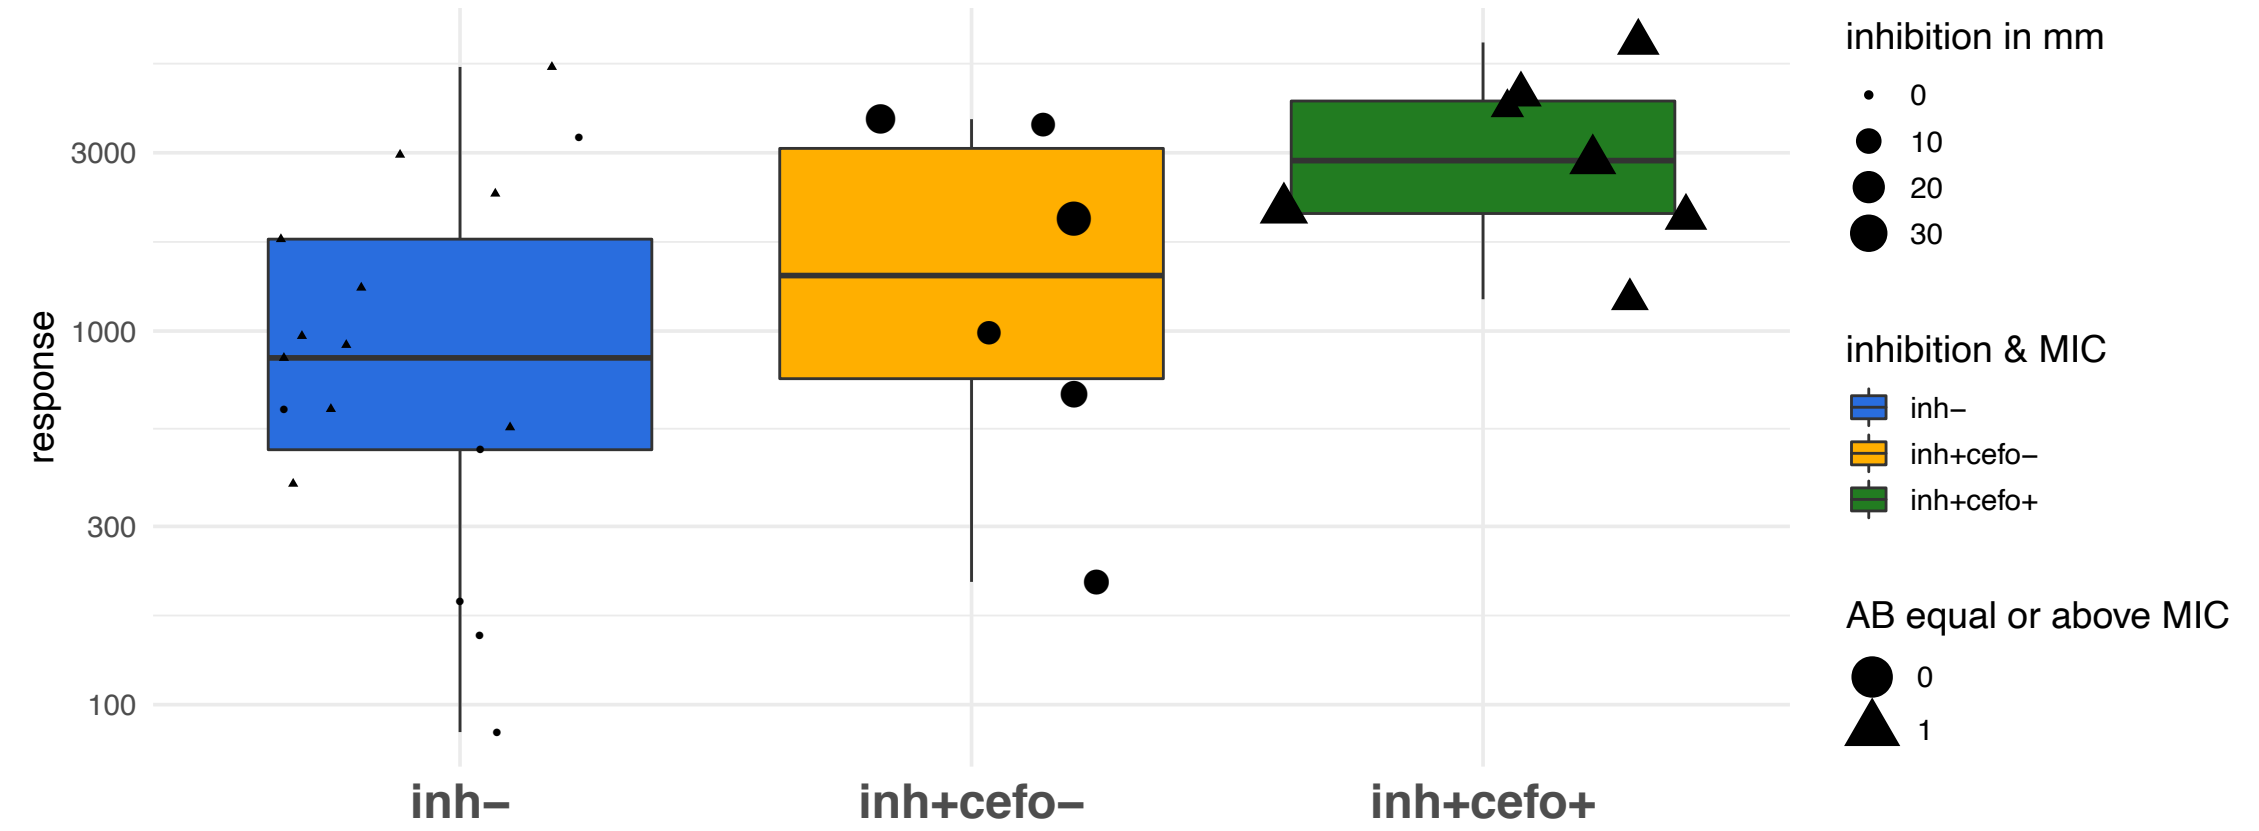

A

SP\_1992

unpaired wilcoxon test

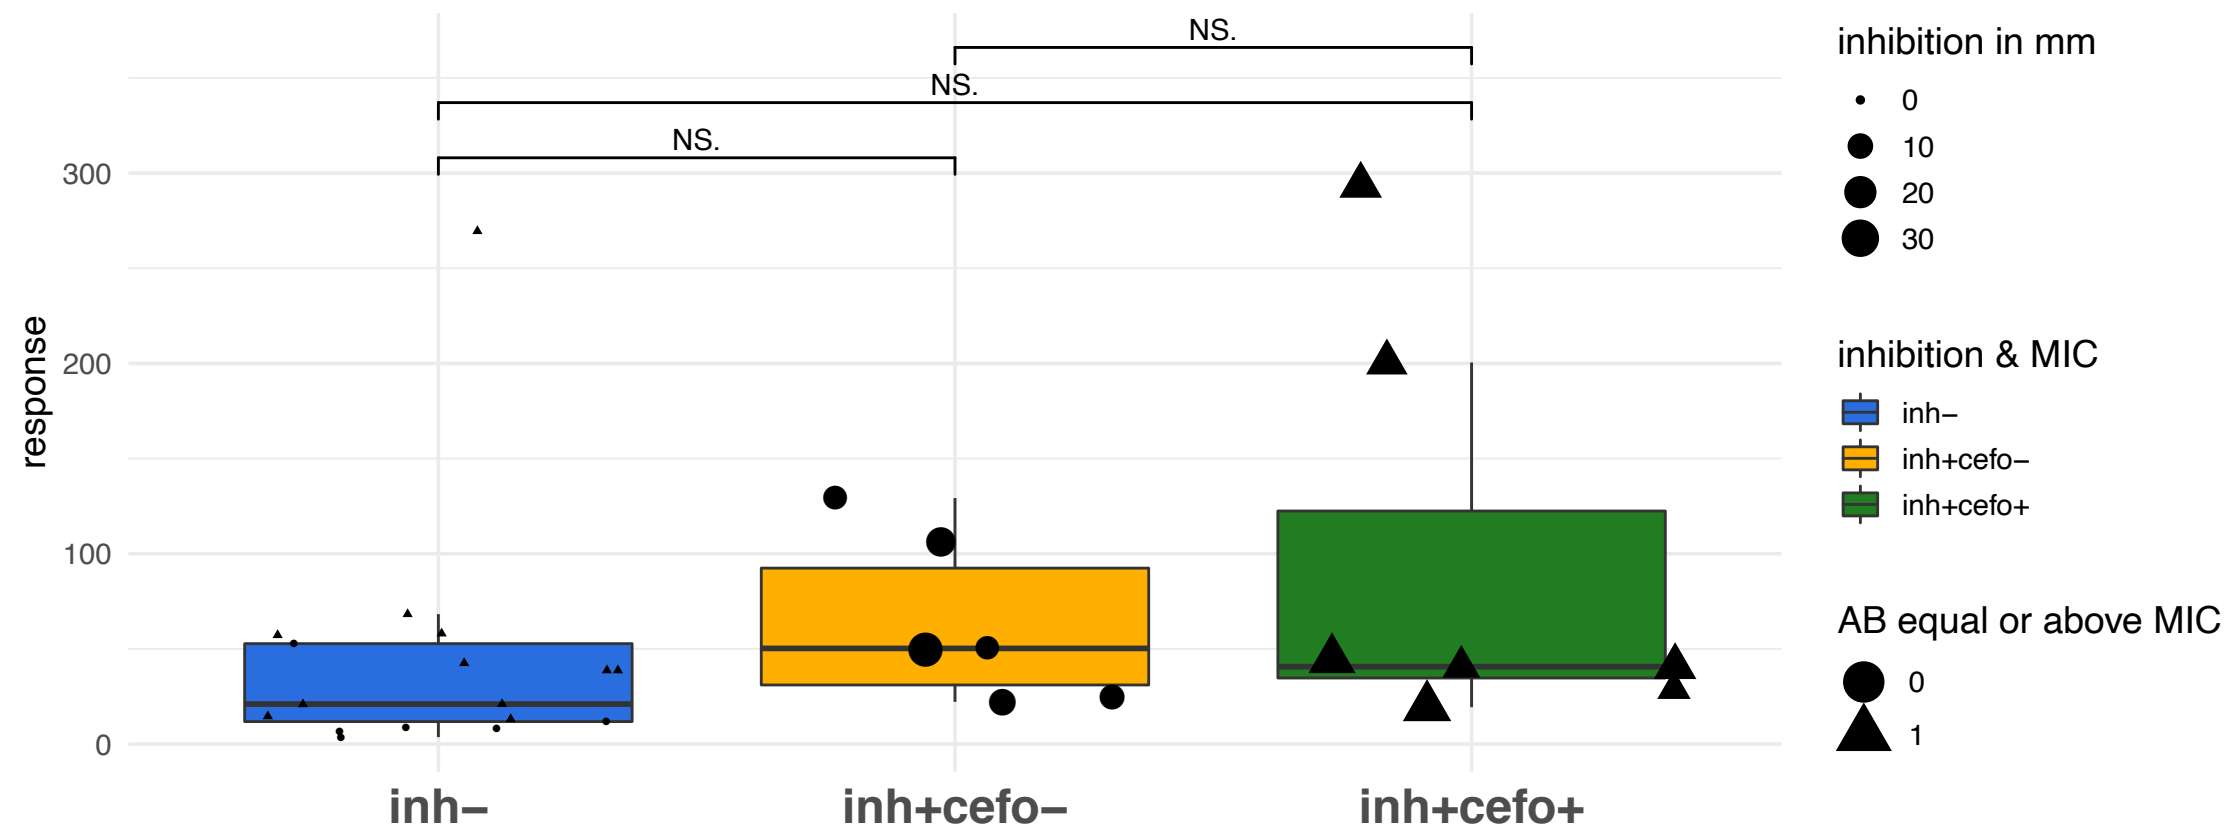

NS &gt;0.05, \* &lt;0.05, \*\* &lt;0.01, \*\*\* &lt;0.001

B

SP\_1992

y-axis = log<sub>10</sub>-scale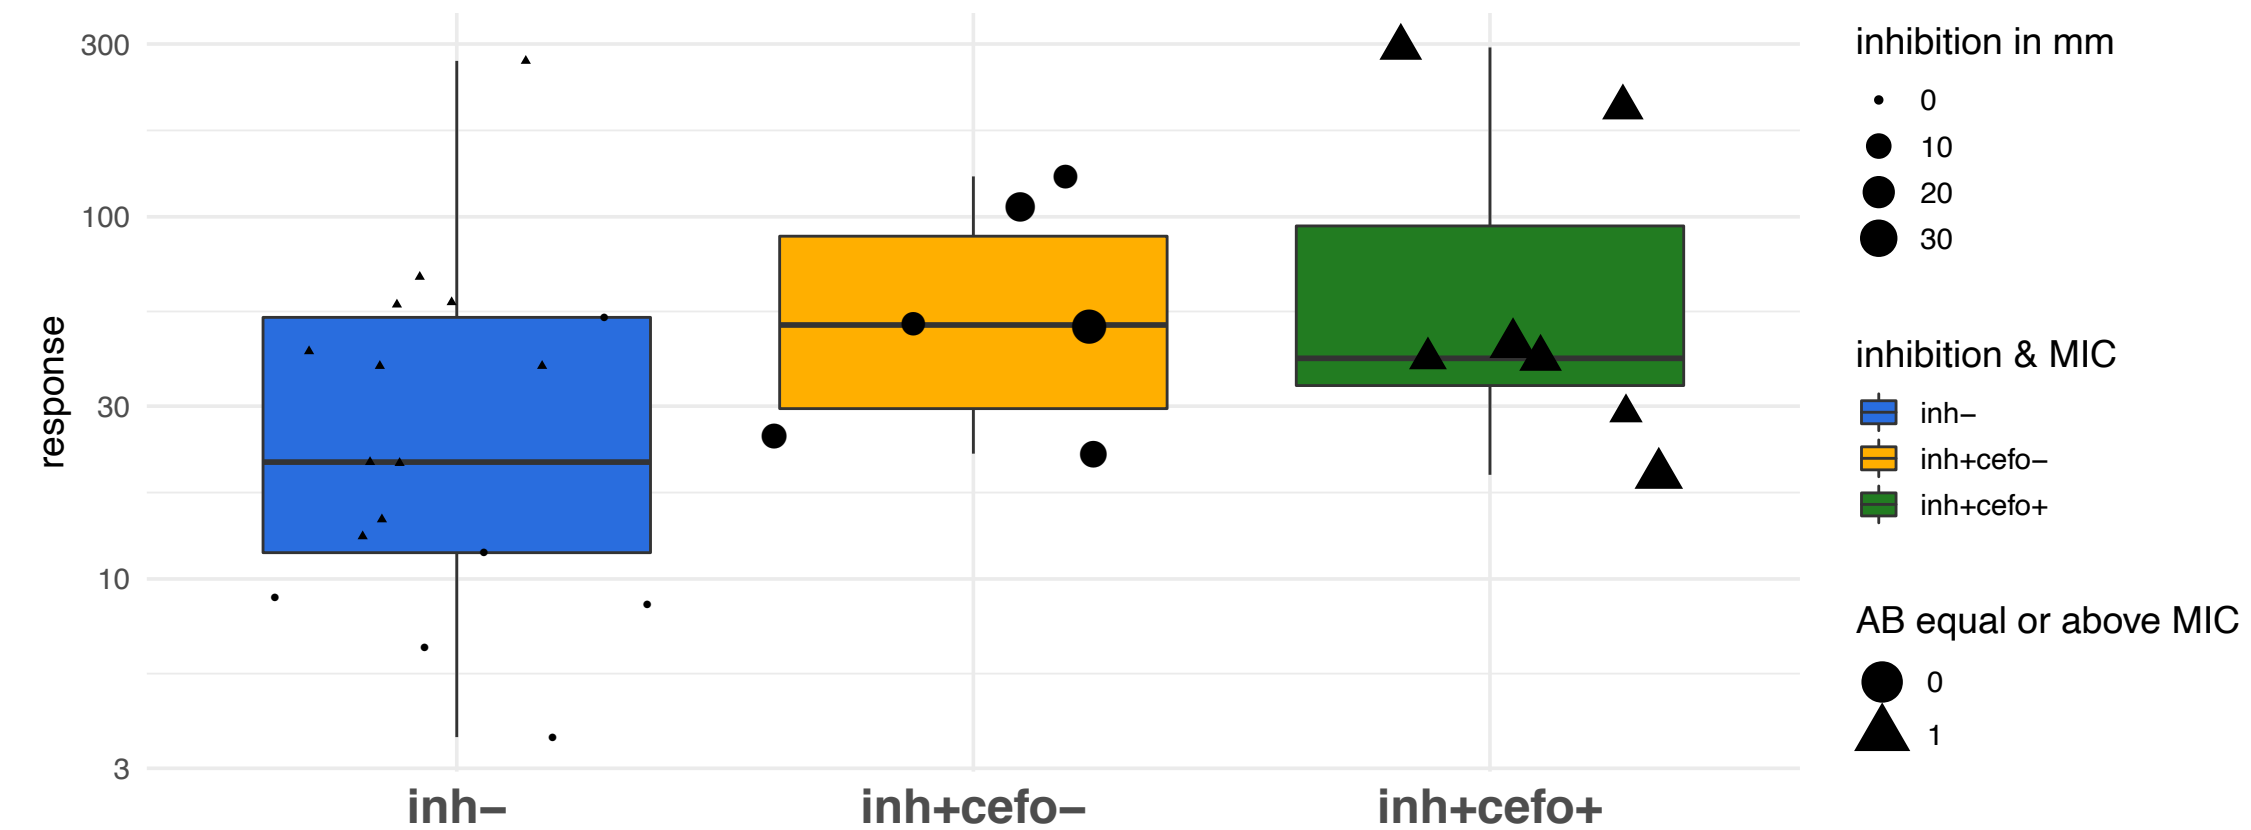

A

## SP\_2063

unpaired wilcoxon test

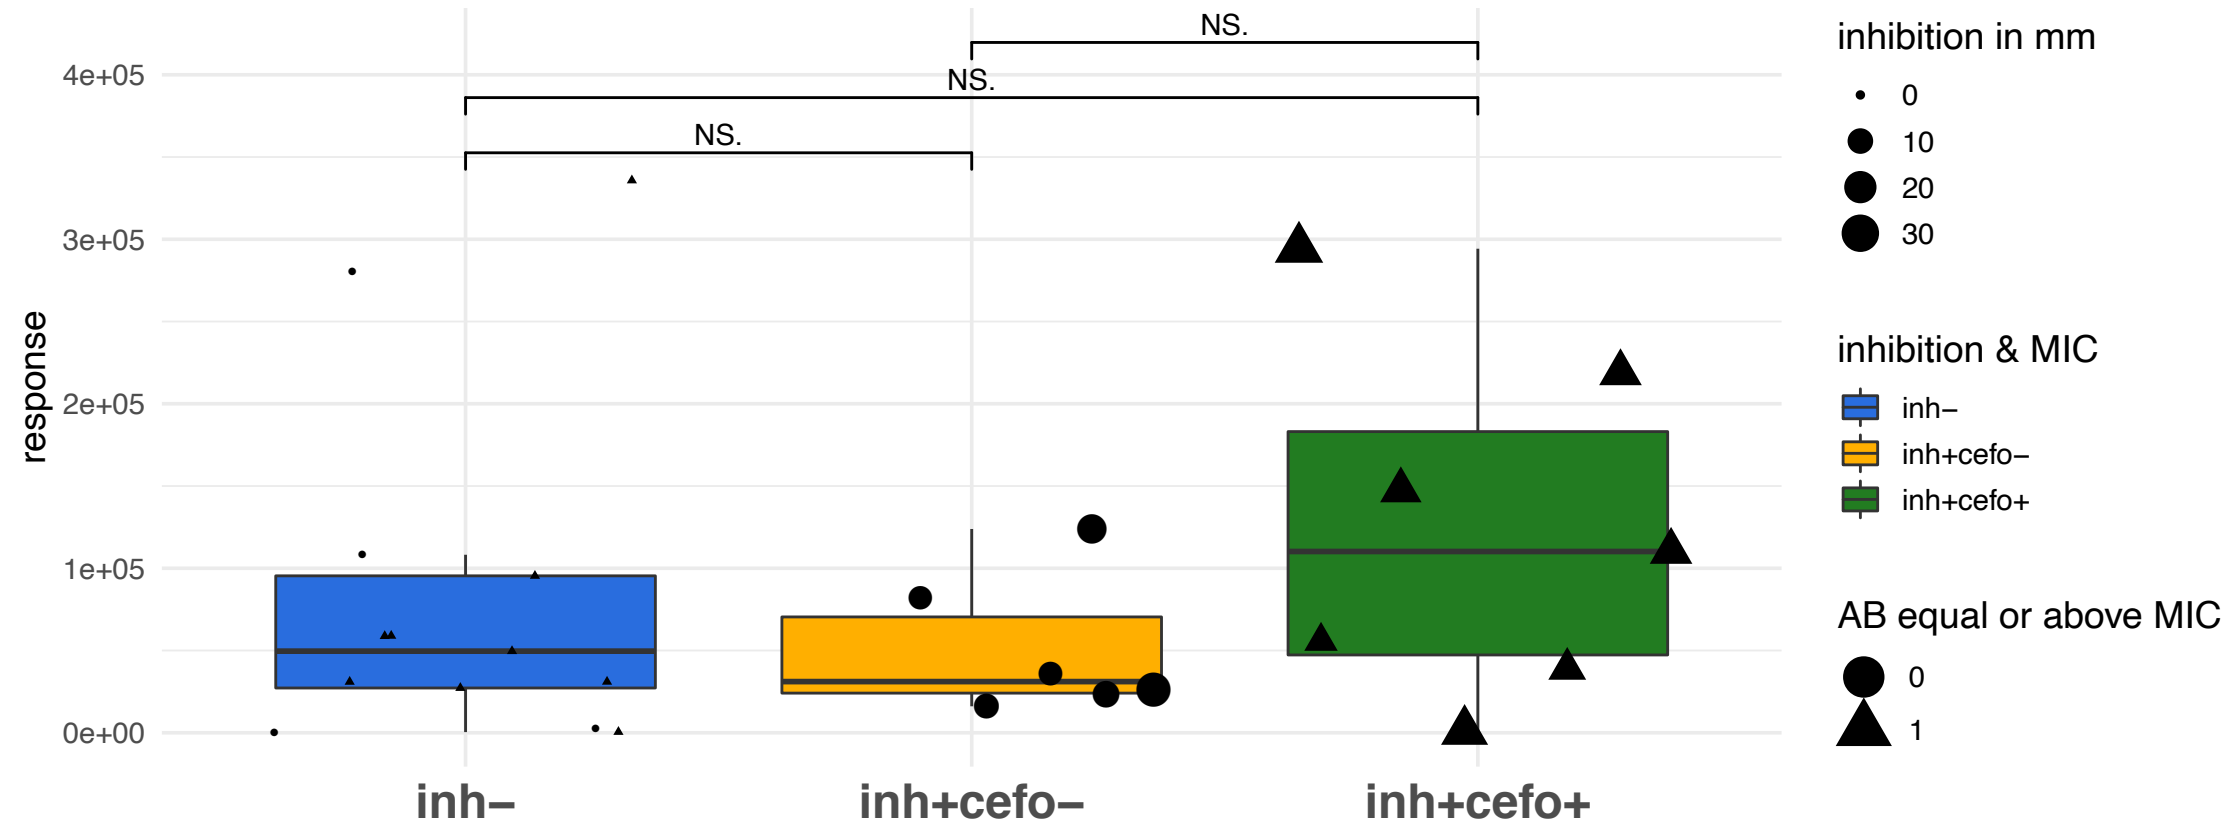

NS &gt;0.05, \* &lt;0.05, \*\* &lt;0.01, \*\*\* &lt;0.001

B

## SP\_2063

y-axis = log<sub>10</sub>-scale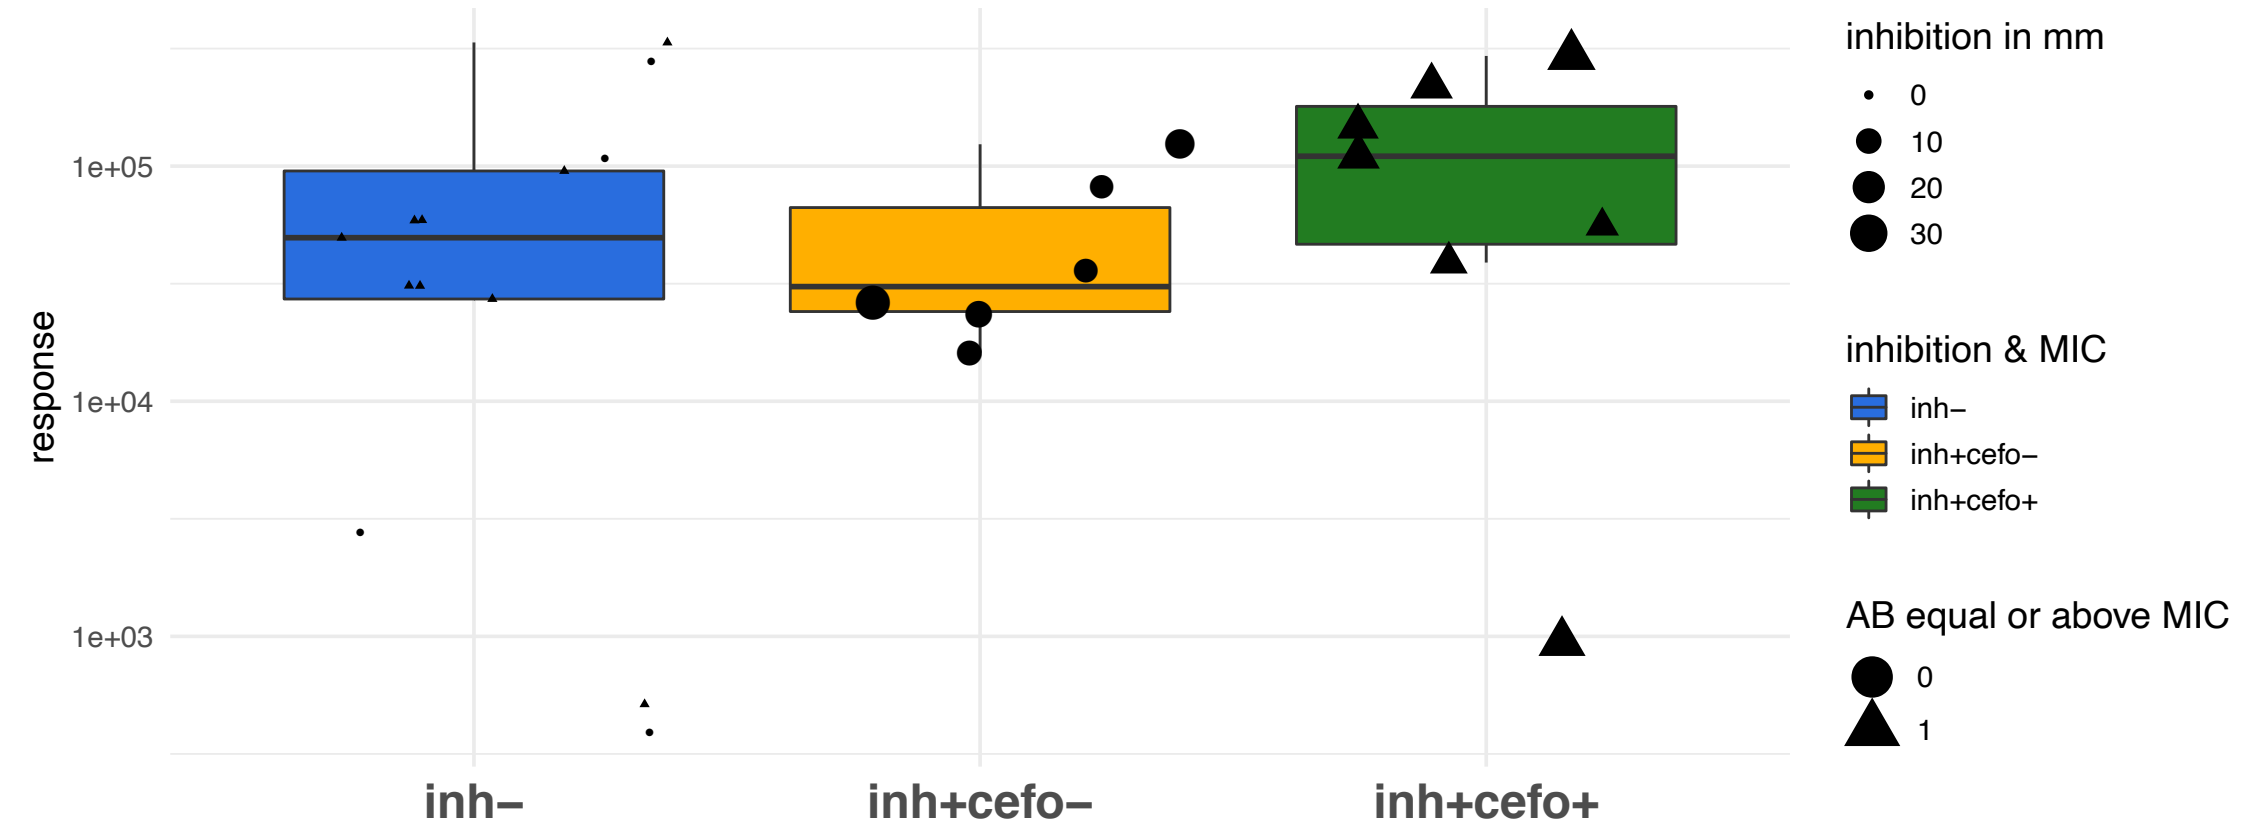

A

## Sp0899

unpaired wilcoxon test

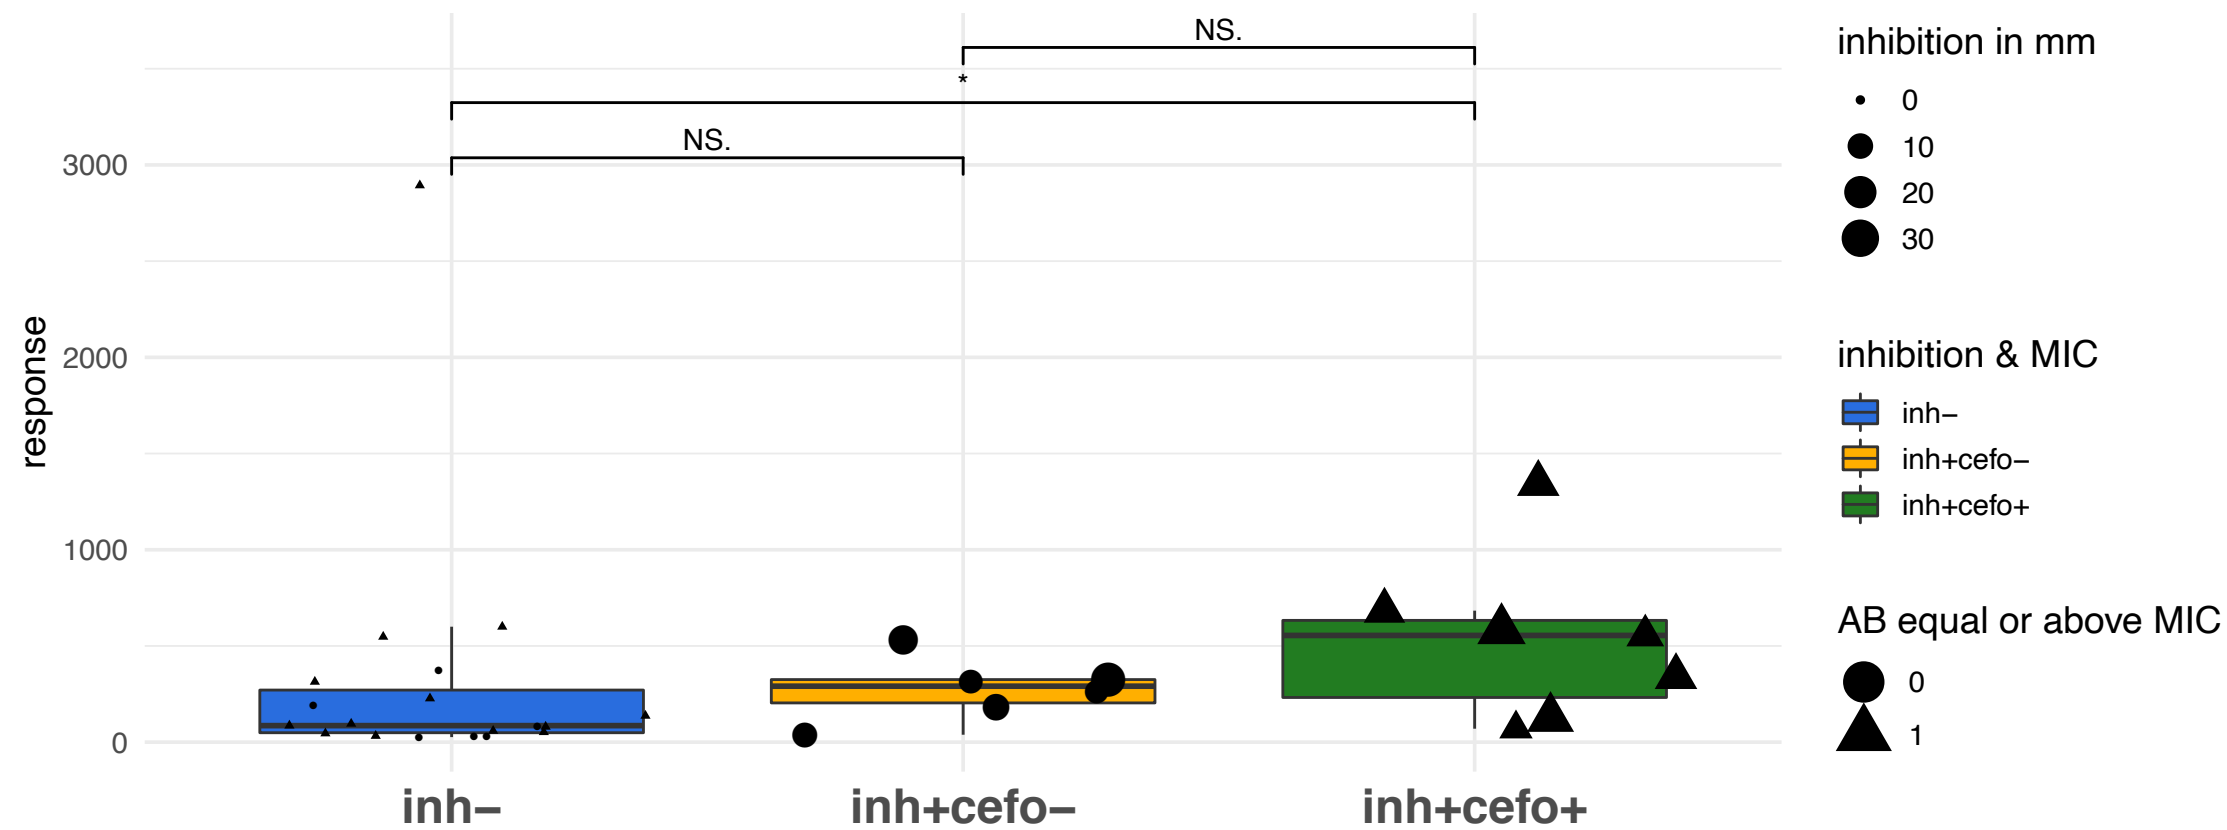

NS &gt;0.05, \* &lt;0.05, \*\* &lt;0.01, \*\*\* &lt;0.001

B

## Sp0899

y-axis = log<sub>10</sub>-scale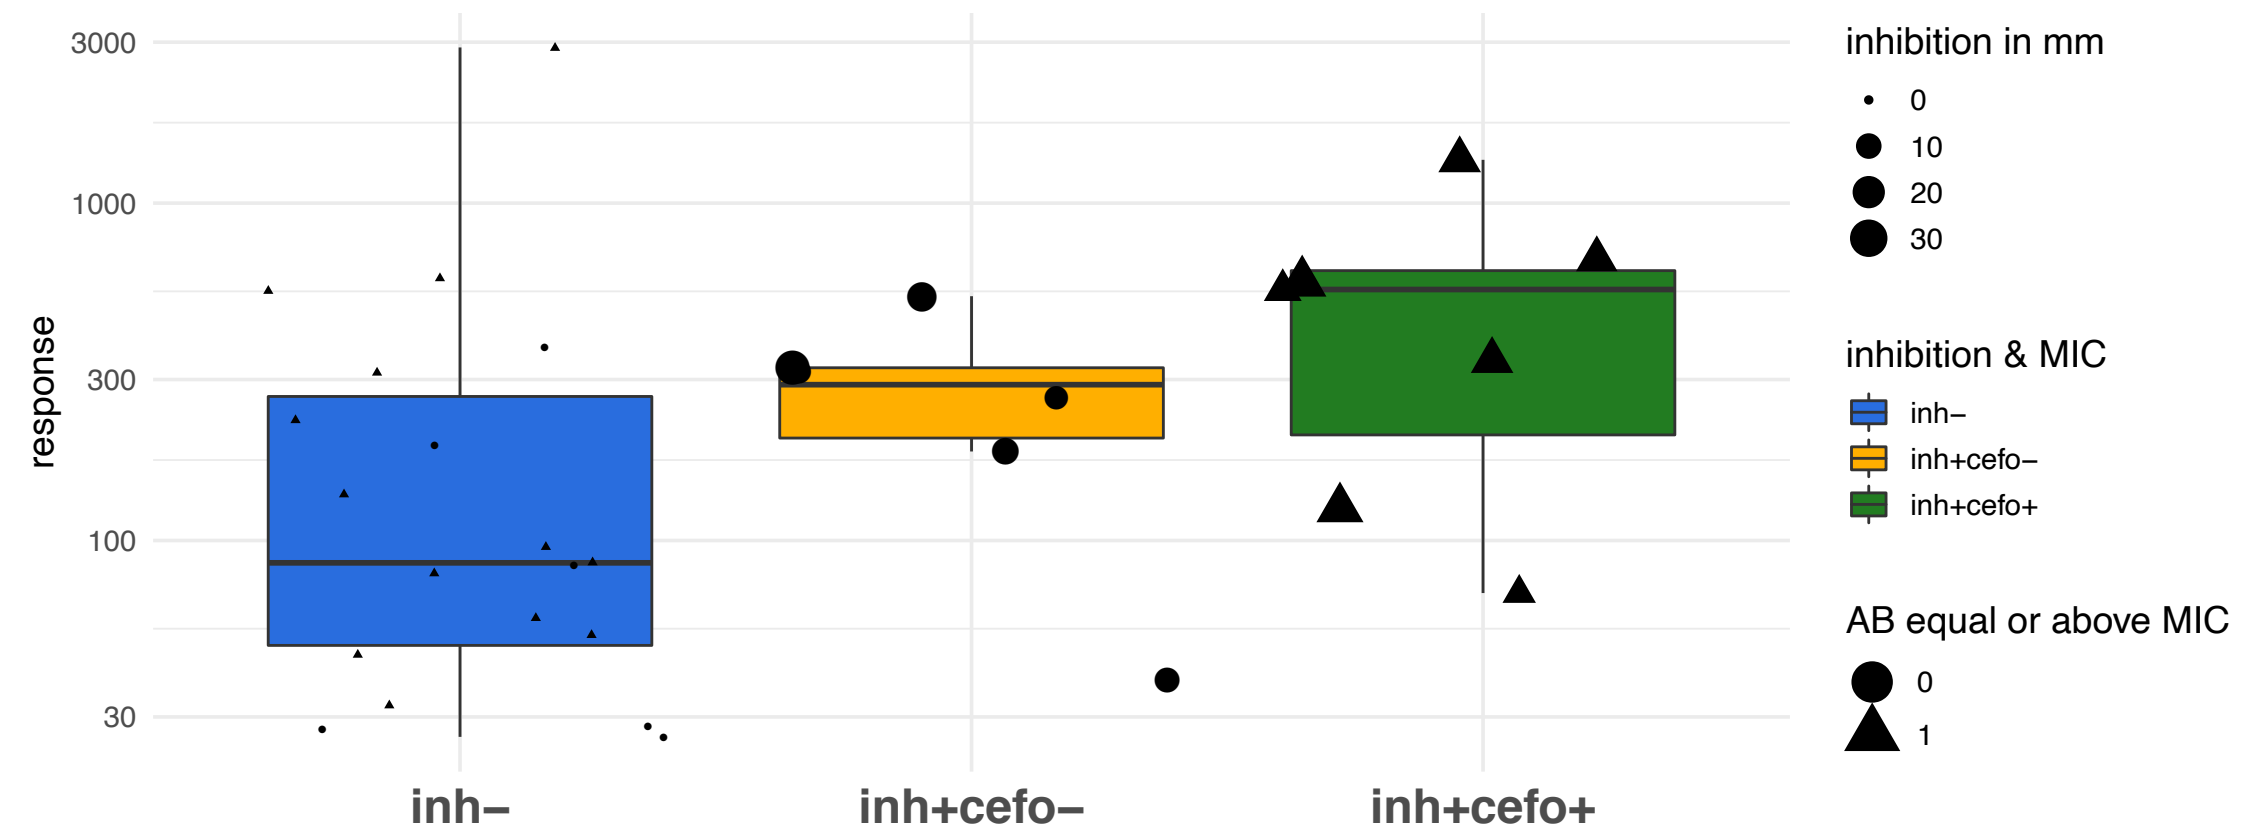

A

## TrxB

unpaired wilcoxon test

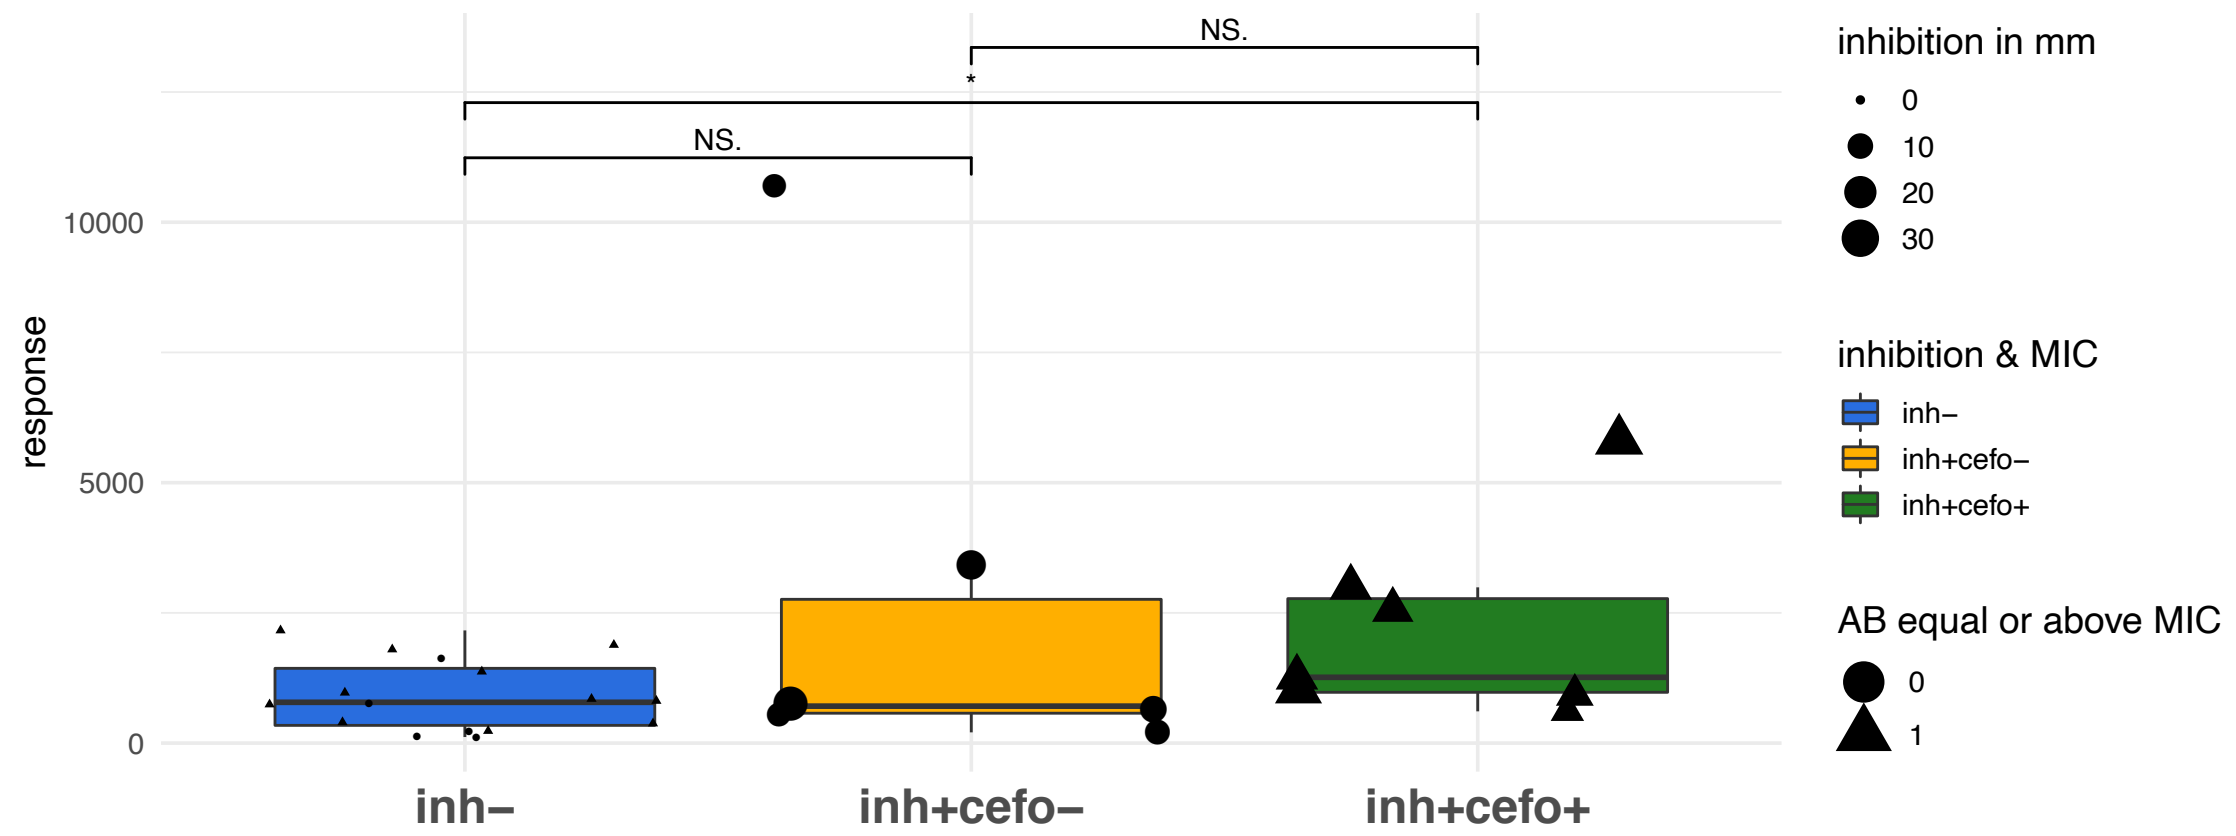

B

## TrxB

y-axis = log<sub>10</sub>-scale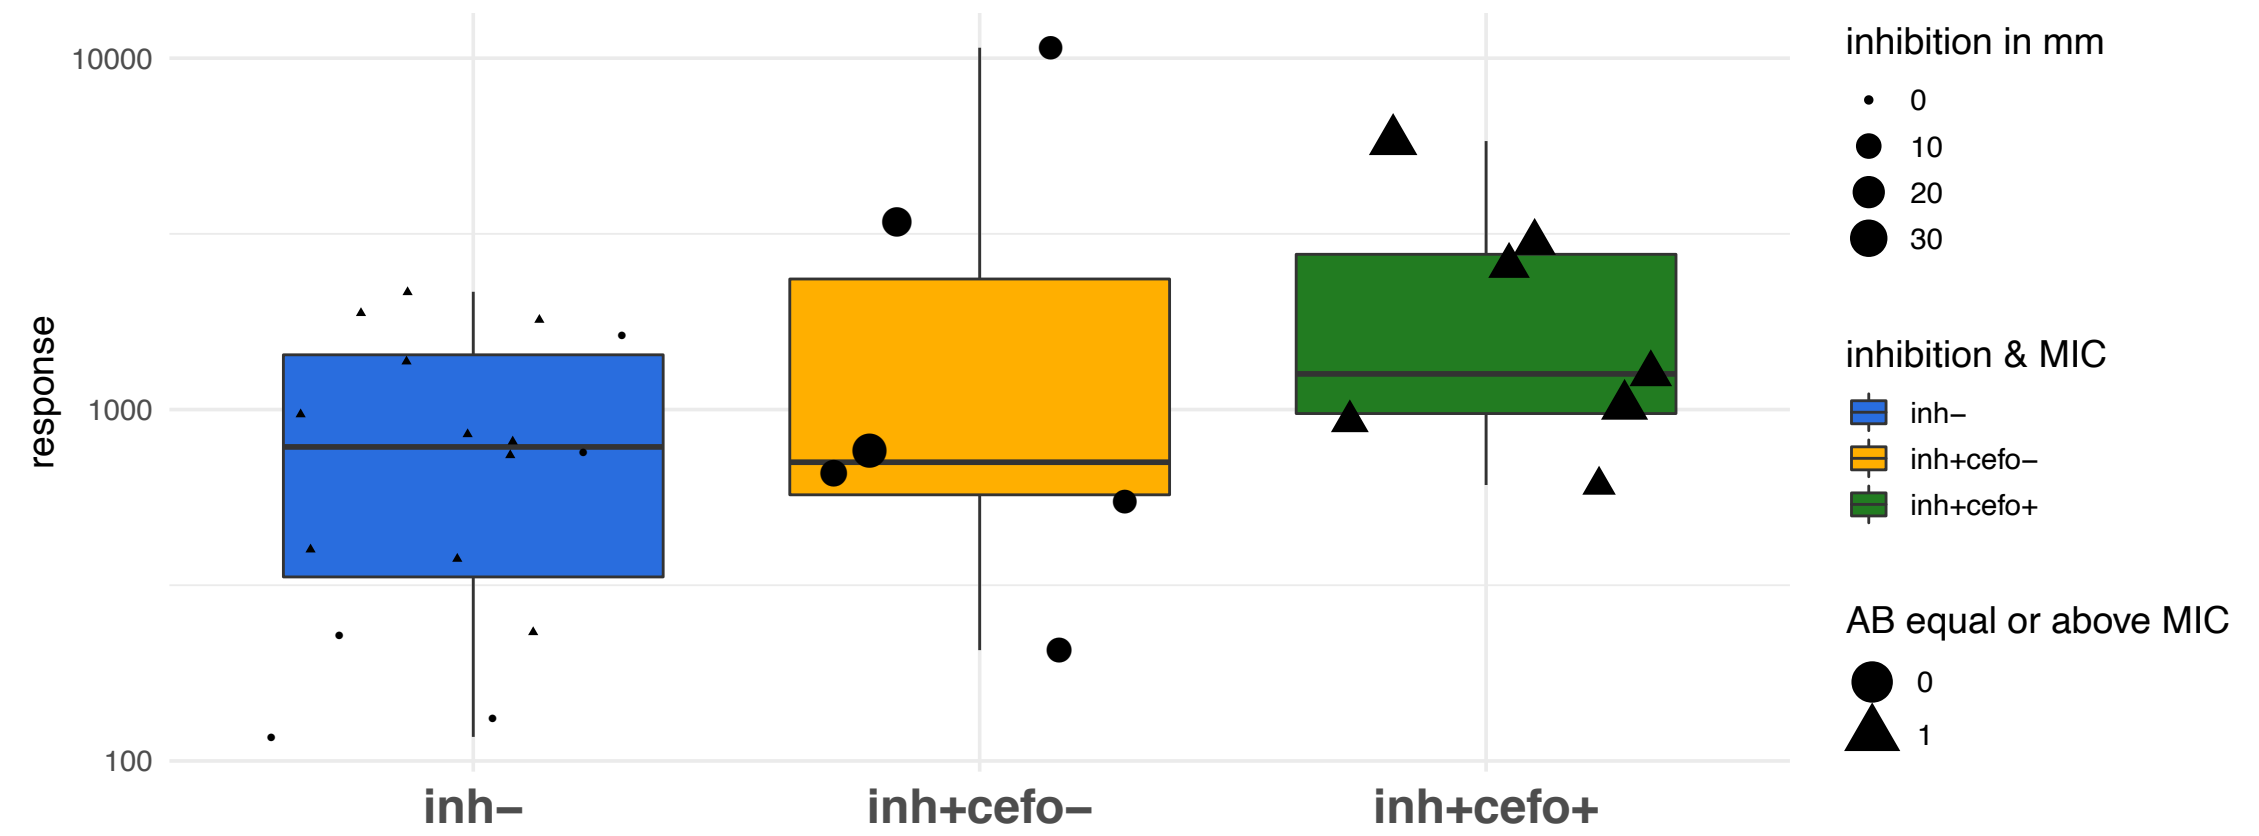

**FIG S5 Individual boxplot graphs of quantified IgG levels against the respective pneumococcal antigens.** The Luminex xMAP technology and xMAPr app were used to quantify the levels of sputum IgGs specific for 55 *S. pneumoniae* antigens. The sizes of the symbols in the boxplots are proportional with the previously measured diameters of pneumococcal growth inhibition zones in mm (1). The colours of the boxes refer to the PLS-identified sputum sample groups as in Fig. 1A. The symbol shape indicates whether the quantified cefotaxime concentration was below (circle, 0), or equal/above (triangle, 1) the MIC for *S. pneumoniae* TIGR4. (A) Boxplot showing the response for a particular antigen on a non-log scale and the statistical outcome of the respective Wilcoxon rank sum test. (B) Boxplot with the response for a particular antigen on a  $\log_{10}$  scale.

## References

1. Seinen J, Dieperink W, Mekonnen SA, Lisotto P, Harmsen HJM, Hiemstra B, Ott A, Schultz D, Lalk M, Oswald S, Hammerschmidt S, de Smet A, van Dijk JM. 2019. Heterogeneous antimicrobial activity in broncho-alveolar aspirates from mechanically ventilated intensive care unit patients. *Virulence* 10:879-891.
